# Supplementary material
Source: publisher figshare collection journal article supplement (https://acs.figshare.com/ndownloader/files/9688300)
Supplement: Supplementary file 1 [file 9688300]

 
data_sba134 
  
_audit_creation_method            'SHELXL-2014/7' 
_shelx_SHELXL_version_number      '2014/7' 
_chemical_name_systematic         ? 
_chemical_name_common             ? 
_chemical_melting_point           ? 
_chemical_formula_moiety          ? 
_chemical_formula_sum 
 'C30 H30 N2 O2' 
_chemical_formula_weight          450.56 
  
loop_ 
 _atom_type_symbol 
 _atom_type_description 
 _atom_type_scat_dispersion_real 
 _atom_type_scat_dispersion_imag 
 _atom_type_scat_source 
 'C'  'C'   0.0033   0.0016 
 'International Tables Vol C Tables 4.2.6.8 and 6.1.1.4' 
 'H'  'H'   0.0000   0.0000 
 'International Tables Vol C Tables 4.2.6.8 and 6.1.1.4' 
 'N'  'N'   0.0061   0.0033 
 'International Tables Vol C Tables 4.2.6.8 and 6.1.1.4' 
 'O'  'O'   0.0106   0.0060 
 'International Tables Vol C Tables 4.2.6.8 and 6.1.1.4' 
  
_space_group_crystal_system       triclinic 
_space_group_IT_number            2 
_space_group_name_H-M_alt         'P -1' 
_space_group_name_Hall            '-P 1' 
  
_shelx_space_group_comment 
; 
The symmetry employed for this shelxl refinement is uniquely defined 
by the following loop, which should always be used as a source of 
symmetry information in preference to the above space-group names. 
They are only intended as comments. 
; 
  
loop_ 
 _space_group_symop_operation_xyz 
 'x, y, z' 
 '-x, -y, -z' 
  
_cell_length_a                    9.0717(11) 
_cell_length_b                    11.0319(12) 
_cell_length_c                    13.5250(18) 
_cell_angle_alpha                 89.234(3) 
_cell_angle_beta                  71.160(3) 
_cell_angle_gamma                 75.601(3) 
_cell_volume                      1237.5(3) 
_cell_formula_units_Z             2 
_cell_measurement_temperature     110(2) 
_cell_measurement_reflns_used     1856 
_cell_measurement_theta_min       2.40 
_cell_measurement_theta_max       22.86 
  
_exptl_crystal_description        polyhedron 
_exptl_crystal_colour             colourless 
_exptl_crystal_density_meas       ? 
_exptl_crystal_density_method     ? 
_exptl_crystal_density_diffrn     1.209 
_exptl_crystal_F_000              480 
_exptl_transmission_factor_min    ? 
_exptl_transmission_factor_max    ? 
_exptl_crystal_size_max           0.190 
_exptl_crystal_size_mid           0.160 
_exptl_crystal_size_min           0.110 
_exptl_absorpt_coefficient_mu     0.076 
_shelx_estimated_absorpt_T_min    0.986 
_shelx_estimated_absorpt_T_max    0.992 
_exptl_absorpt_correction_type    multi-scan 
_exptl_absorpt_correction_T_min   0.9255 
_exptl_absorpt_correction_T_max   0.9579 
_exptl_absorpt_process_details
;
Sheldrick, G. M. (2008). <i>SADABS</i>. University of G\"ottingen, Germany.
; 
_exptl_absorpt_special_details    ? 
_diffrn_ambient_temperature       110(2) 
_diffrn_radiation_wavelength      0.71073 
_diffrn_radiation_type            MoK\a 
_diffrn_source                    ? 
_diffrn_measurement_device_type   'Bruker APEX-II CCD' 
_diffrn_measurement_method        '\f and \w scans' 
_diffrn_detector_area_resol_mean  ? 
_diffrn_reflns_number             10960 
_diffrn_reflns_av_unetI/netI      0.0629 
_diffrn_reflns_av_R_equivalents   0.0389 
_diffrn_reflns_limit_h_min        -10 
_diffrn_reflns_limit_h_max        10 
_diffrn_reflns_limit_k_min        -10 
_diffrn_reflns_limit_k_max        13 
_diffrn_reflns_limit_l_min        -16 
_diffrn_reflns_limit_l_max        16 
_diffrn_reflns_theta_min          1.911 
_diffrn_reflns_theta_max          25.119 
_diffrn_reflns_theta_full         25.119 
_diffrn_measured_fraction_theta_max   0.993 
_diffrn_measured_fraction_theta_full  0.993 
_diffrn_reflns_Laue_measured_fraction_max    0.993 
_diffrn_reflns_Laue_measured_fraction_full   0.993 
_diffrn_reflns_point_group_measured_fraction_max   0.993 
_diffrn_reflns_point_group_measured_fraction_full  0.993 
_reflns_number_total              4388 
_reflns_number_gt                 3215 
_reflns_threshold_expression      'I > 2\s(I)' 
_reflns_Friedel_coverage          0.000 
_reflns_Friedel_fraction_max      . 
_reflns_Friedel_fraction_full     . 
  
_reflns_special_details 
; 
 Reflections were merged by SHELXL according to the crystal 
 class for the calculation of statistics and refinement. 
  
 _reflns_Friedel_fraction is defined as the number of unique 
 Friedel pairs measured divided by the number that would be 
 possible theoretically, ignoring centric projections and 
 systematic absences. 
; 
  
_computing_data_collection        'Bruker APEX2' 
_computing_cell_refinement        'Bruker SAINT' 
_computing_data_reduction         'Bruker SAINT' 
_computing_structure_solution     'SHELXS-97 (Sheldrick 2008)' 
_computing_structure_refinement 'SHELXL-2014/7 (Sheldrick, 2014)' 
_computing_molecular_graphics     'Bruker SHELXTL' 
_computing_publication_material   'Bruker SHELXTL' 
_refine_special_details           ? 
_refine_ls_structure_factor_coef  Fsqd 
_refine_ls_matrix_type            full 
_refine_ls_weighting_scheme       calc 
_refine_ls_weighting_details 
'w=1/[\s^2^(Fo^2^)+(0.0366P)^2^+0.5306P] where P=(Fo^2^+2Fc^2^)/3' 
_atom_sites_solution_primary      ? 
_atom_sites_solution_secondary    ? 
_atom_sites_solution_hydrogens    geom 
_refine_ls_hydrogen_treatment     constr 
_refine_ls_extinction_method      none 
_refine_ls_extinction_coef        . 
_refine_ls_number_reflns          4388 
_refine_ls_number_parameters      308 
_refine_ls_number_restraints      0 
_refine_ls_R_factor_all           0.0846 
_refine_ls_R_factor_gt            0.0557 
_refine_ls_wR_factor_ref          0.1310 
_refine_ls_wR_factor_gt           0.1107 
_refine_ls_goodness_of_fit_ref    1.111 
_refine_ls_restrained_S_all       1.111 
_refine_ls_shift/su_max           0.000 
_refine_ls_shift/su_mean          0.000 
  
loop_ 
 _atom_site_label 
 _atom_site_type_symbol 
 _atom_site_fract_x 
 _atom_site_fract_y 
 _atom_site_fract_z 
 _atom_site_U_iso_or_equiv 
 _atom_site_adp_type 
 _atom_site_occupancy 
 _atom_site_site_symmetry_order 
 _atom_site_calc_flag 
 _atom_site_refinement_flags_posn 
 _atom_site_refinement_flags_adp 
 _atom_site_refinement_flags_occupancy 
 _atom_site_disorder_assembly 
 _atom_site_disorder_group 
N1 N 0.5369(2) 0.63090(17) 0.73946(15) 0.0185(4) Uani 1 1 d . . . . . 
C2 C 0.4621(3) 0.7540(2) 0.76918(17) 0.0201(5) Uani 1 1 d . . . . . 
O2 O 0.31721(19) 0.79504(15) 0.81629(13) 0.0255(4) Uani 1 1 d . . . . . 
C3 C 0.5718(3) 0.8424(2) 0.73814(17) 0.0185(5) Uani 1 1 d . . . . . 
H3 H 0.5010 0.9294 0.7450 0.022 Uiso 1 1 calc R U . . . 
N4 N 0.6689(2) 0.81315(17) 0.62732(14) 0.0188(4) Uani 1 1 d . . . . . 
C5 C 0.7575(3) 0.6912(2) 0.59809(18) 0.0209(5) Uani 1 1 d . . . . . 
O5 O 0.87158(19) 0.65934(15) 0.51694(12) 0.0264(4) Uani 1 1 d . . . . . 
C6 C 0.7037(3) 0.5991(2) 0.67460(17) 0.0192(5) Uani 1 1 d . . . . . 
C11 C 0.4434(3) 0.5364(2) 0.74090(19) 0.0226(5) Uani 1 1 d . . . . . 
H11 H 0.5239 0.4531 0.7190 0.027 Uiso 1 1 calc R U . . . 
C12 C 0.3265(3) 0.5240(2) 0.8482(2) 0.0300(6) Uani 1 1 d . . . . . 
H12A H 0.2401 0.6029 0.8719 0.036 Uiso 1 1 calc R U . . . 
H12B H 0.3842 0.5080 0.8999 0.036 Uiso 1 1 calc R U . . . 
C13 C 0.2534(3) 0.4153(3) 0.8402(2) 0.0419(7) Uani 1 1 d . . . . . 
H13A H 0.3396 0.3359 0.8218 0.050 Uiso 1 1 calc R U . . . 
H13B H 0.1744 0.4085 0.9091 0.050 Uiso 1 1 calc R U . . . 
C14 C 0.1697(3) 0.4338(3) 0.7578(3) 0.0468(8) Uani 1 1 d . . . . . 
H14A H 0.0754 0.5076 0.7804 0.056 Uiso 1 1 calc R U . . . 
H14B H 0.1302 0.3593 0.7514 0.056 Uiso 1 1 calc R U . . . 
C15 C 0.2836(3) 0.4534(3) 0.6514(2) 0.0422(8) Uani 1 1 d . . . . . 
H15A H 0.3704 0.3753 0.6243 0.051 Uiso 1 1 calc R U . . . 
H15B H 0.2235 0.4722 0.6012 0.051 Uiso 1 1 calc R U . . . 
C16 C 0.3579(3) 0.5607(2) 0.6597(2) 0.0286(6) Uani 1 1 d . . . . . 
H16A H 0.2724 0.6404 0.6801 0.034 Uiso 1 1 calc R U . . . 
H16B H 0.4358 0.5686 0.5908 0.034 Uiso 1 1 calc R U . . . 
C31 C 0.6699(3) 0.8400(2) 0.81151(17) 0.0197(5) Uani 1 1 d . . . . . 
C32 C 0.8348(3) 0.8273(2) 0.77503(19) 0.0234(6) Uani 1 1 d . . . . . 
H32 H 0.8913 0.8178 0.7018 0.028 Uiso 1 1 calc R U . . . 
C33 C 0.9180(3) 0.8286(2) 0.84549(19) 0.0266(6) Uani 1 1 d . . . . . 
H33 H 1.0311 0.8195 0.8195 0.032 Uiso 1 1 calc R U . . . 
C34 C 0.8387(3) 0.8429(2) 0.9526(2) 0.0287(6) Uani 1 1 d . . . . . 
C35 C 0.6742(3) 0.8537(2) 0.98796(19) 0.0299(6) Uani 1 1 d . . . . . 
H35 H 0.6177 0.8614 1.0611 0.036 Uiso 1 1 calc R U . . . 
C36 C 0.5907(3) 0.8537(2) 0.91862(19) 0.0255(6) Uani 1 1 d . . . . . 
H36 H 0.4776 0.8631 0.9448 0.031 Uiso 1 1 calc R U . . . 
C38 C 0.9259(4) 0.8494(3) 1.0289(2) 0.0498(8) Uani 1 1 d . . . . . 
H38A H 0.8752 0.9281 1.0731 0.075 Uiso 1 1 calc R U . . . 
H38B H 1.0389 0.8462 0.9904 0.075 Uiso 1 1 calc R U . . . 
H38C H 0.9206 0.7783 1.0729 0.075 Uiso 1 1 calc R U . . . 
C41 C 0.6929(3) 0.9116(2) 0.55889(18) 0.0210(5) Uani 1 1 d . . . . . 
C42 C 0.7091(3) 0.8919(2) 0.45390(19) 0.0252(6) Uani 1 1 d . . . . . 
H42 H 0.7060 0.8133 0.4280 0.030 Uiso 1 1 calc R U . . . 
C43 C 0.7296(3) 0.9875(2) 0.3876(2) 0.0294(6) Uani 1 1 d . . . . . 
H43 H 0.7421 0.9739 0.3158 0.035 Uiso 1 1 calc R U . . . 
C44 C 0.7321(3) 1.1025(3) 0.4250(2) 0.0354(7) Uani 1 1 d . . . . . 
H44 H 0.7461 1.1678 0.3792 0.042 Uiso 1 1 calc R U . . . 
C45 C 0.7143(3) 1.1223(3) 0.5292(2) 0.0361(7) Uani 1 1 d . . . . . 
H45 H 0.7152 1.2017 0.5550 0.043 Uiso 1 1 calc R U . . . 
C46 C 0.6952(3) 1.0270(2) 0.5966(2) 0.0289(6) Uani 1 1 d . . . . . 
H46 H 0.6837 1.0409 0.6682 0.035 Uiso 1 1 calc R U . . . 
C60 C 0.8124(3) 0.4909(2) 0.67242(18) 0.0205(5) Uani 1 1 d . . . . . 
H60 H 0.9138 0.4798 0.6189 0.025 Uiso 1 1 calc R U . . . 
C61 C 0.7976(3) 0.3865(2) 0.74100(18) 0.0204(5) Uani 1 1 d . . . . . 
C62 C 0.7107(3) 0.4049(2) 0.84811(18) 0.0253(6) Uani 1 1 d . . . . . 
H62 H 0.6595 0.4876 0.8797 0.030 Uiso 1 1 calc R U . . . 
C63 C 0.6990(3) 0.3032(2) 0.9085(2) 0.0303(6) Uani 1 1 d . . . . . 
H63 H 0.6391 0.3163 0.9812 0.036 Uiso 1 1 calc R U . . . 
C64 C 0.7743(3) 0.1821(2) 0.8633(2) 0.0293(6) Uani 1 1 d . . . . . 
H64 H 0.7632 0.1124 0.9044 0.035 Uiso 1 1 calc R U . . . 
C65 C 0.8653(3) 0.1630(2) 0.7583(2) 0.0279(6) Uani 1 1 d . . . . . 
H65 H 0.9193 0.0801 0.7278 0.033 Uiso 1 1 calc R U . . . 
C66 C 0.8779(3) 0.2645(2) 0.69744(19) 0.0226(5) Uani 1 1 d . . . . . 
H66 H 0.9419 0.2509 0.6255 0.027 Uiso 1 1 calc R U . . . 
  
loop_ 
 _atom_site_aniso_label 
 _atom_site_aniso_U_11 
 _atom_site_aniso_U_22 
 _atom_site_aniso_U_33 
 _atom_site_aniso_U_23 
 _atom_site_aniso_U_13 
 _atom_site_aniso_U_12 
N1 0.0148(10) 0.0159(10) 0.0246(10) 0.0015(8) -0.0047(8) -0.0058(8) 
C2 0.0184(13) 0.0216(13) 0.0200(12) 0.0018(10) -0.0066(10) -0.0045(10) 
O2 0.0160(9) 0.0289(10) 0.0287(9) -0.0010(7) -0.0040(7) -0.0047(7) 
C3 0.0155(12) 0.0181(12) 0.0197(12) 0.0011(9) -0.0035(10) -0.0037(10) 
N4 0.0185(10) 0.0170(10) 0.0180(10) 0.0014(8) -0.0042(8) -0.0019(8) 
C5 0.0185(13) 0.0234(13) 0.0212(12) 0.0012(10) -0.0078(10) -0.0048(10) 
O5 0.0245(10) 0.0264(10) 0.0216(9) 0.0015(7) -0.0007(8) -0.0039(8) 
C6 0.0151(12) 0.0216(13) 0.0198(12) 0.0001(10) -0.0037(10) -0.0056(10) 
C11 0.0209(13) 0.0206(13) 0.0299(13) 0.0012(10) -0.0104(11) -0.0088(10) 
C12 0.0260(14) 0.0325(15) 0.0343(15) 0.0087(12) -0.0092(12) -0.0141(12) 
C13 0.0346(17) 0.0360(17) 0.060(2) 0.0135(14) -0.0152(15) -0.0199(14) 
C14 0.0354(17) 0.0412(19) 0.076(2) 0.0073(16) -0.0262(17) -0.0205(15) 
C15 0.0395(17) 0.0352(17) 0.066(2) -0.0032(15) -0.0324(16) -0.0141(14) 
C16 0.0293(15) 0.0299(15) 0.0317(14) 0.0025(11) -0.0153(12) -0.0100(12) 
C31 0.0209(13) 0.0170(12) 0.0212(12) 0.0018(10) -0.0066(10) -0.0055(10) 
C32 0.0220(13) 0.0252(14) 0.0232(13) 0.0023(10) -0.0071(10) -0.0066(11) 
C33 0.0236(14) 0.0259(14) 0.0330(14) 0.0026(11) -0.0130(11) -0.0063(11) 
C34 0.0375(16) 0.0234(14) 0.0342(15) 0.0079(11) -0.0202(12) -0.0131(12) 
C35 0.0371(16) 0.0347(16) 0.0207(13) 0.0026(11) -0.0090(12) -0.0150(13) 
C36 0.0249(14) 0.0247(14) 0.0260(13) 0.0014(10) -0.0053(11) -0.0088(11) 
C38 0.059(2) 0.054(2) 0.053(2) 0.0125(16) -0.0342(17) -0.0241(17) 
C41 0.0173(12) 0.0217(13) 0.0247(13) 0.0075(10) -0.0071(10) -0.0065(10) 
C42 0.0213(13) 0.0267(14) 0.0271(13) 0.0029(11) -0.0108(11) -0.0016(11) 
C43 0.0241(14) 0.0376(16) 0.0263(14) 0.0115(12) -0.0110(11) -0.0043(12) 
C44 0.0333(16) 0.0358(17) 0.0409(16) 0.0192(13) -0.0164(13) -0.0108(13) 
C45 0.0428(17) 0.0249(15) 0.0495(18) 0.0132(13) -0.0227(14) -0.0154(13) 
C46 0.0357(16) 0.0254(14) 0.0319(14) 0.0058(11) -0.0177(12) -0.0103(12) 
C60 0.0168(12) 0.0211(13) 0.0231(12) 0.0008(10) -0.0058(10) -0.0052(10) 
C61 0.0162(12) 0.0200(13) 0.0260(13) 0.0024(10) -0.0083(10) -0.0048(10) 
C62 0.0265(14) 0.0227(13) 0.0251(13) -0.0008(10) -0.0088(11) -0.0031(11) 
C63 0.0325(15) 0.0318(15) 0.0221(13) 0.0061(11) -0.0053(11) -0.0050(12) 
C64 0.0299(15) 0.0261(14) 0.0308(14) 0.0084(11) -0.0086(12) -0.0074(12) 
C65 0.0228(14) 0.0231(14) 0.0353(15) 0.0040(11) -0.0065(11) -0.0059(11) 
C66 0.0183(13) 0.0236(13) 0.0235(13) 0.0013(10) -0.0042(10) -0.0044(10) 
  
_geom_special_details 
; 
 All esds (except the esd in the dihedral angle between two l.s. planes) 
 are estimated using the full covariance matrix.  The cell esds are taken 
 into account individually in the estimation of esds in distances, angles 
 and torsion angles; correlations between esds in cell parameters are only 
 used when they are defined by crystal symmetry.  An approximate (isotropic) 
 treatment of cell esds is used for estimating esds involving l.s. planes. 
; 
  
loop_ 
 _geom_bond_atom_site_label_1 
 _geom_bond_atom_site_label_2 
 _geom_bond_distance 
 _geom_bond_site_symmetry_2 
 _geom_bond_publ_flag 
N1 C2 1.359(3) . ? 
N1 C6 1.438(3) . ? 
N1 C11 1.495(3) . ? 
C2 O2 1.229(3) . ? 
C2 C3 1.523(3) . ? 
C3 N4 1.465(3) . ? 
C3 C31 1.528(3) . ? 
C3 H3 1.0000 . ? 
N4 C5 1.373(3) . ? 
N4 C41 1.430(3) . ? 
C5 O5 1.223(3) . ? 
C5 C6 1.495(3) . ? 
C6 C60 1.339(3) . ? 
C11 C16 1.523(3) . ? 
C11 C12 1.524(3) . ? 
C11 H11 1.0000 . ? 
C12 C13 1.529(3) . ? 
C12 H12A 0.9900 . ? 
C12 H12B 0.9900 . ? 
C13 C14 1.524(4) . ? 
C13 H13A 0.9900 . ? 
C13 H13B 0.9900 . ? 
C14 C15 1.526(4) . ? 
C14 H14A 0.9900 . ? 
C14 H14B 0.9900 . ? 
C15 C16 1.522(3) . ? 
C15 H15A 0.9900 . ? 
C15 H15B 0.9900 . ? 
C16 H16A 0.9900 . ? 
C16 H16B 0.9900 . ? 
C31 C36 1.385(3) . ? 
C31 C32 1.386(3) . ? 
C32 C33 1.396(3) . ? 
C32 H32 0.9500 . ? 
C33 C34 1.385(3) . ? 
C33 H33 0.9500 . ? 
C34 C35 1.386(4) . ? 
C34 C38 1.501(4) . ? 
C35 C36 1.383(3) . ? 
C35 H35 0.9500 . ? 
C36 H36 0.9500 . ? 
C38 H38A 0.9800 . ? 
C38 H38B 0.9800 . ? 
C38 H38C 0.9800 . ? 
C41 C46 1.385(3) . ? 
C41 C42 1.394(3) . ? 
C42 C43 1.384(3) . ? 
C42 H42 0.9500 . ? 
C43 C44 1.380(4) . ? 
C43 H43 0.9500 . ? 
C44 C45 1.380(4) . ? 
C44 H44 0.9500 . ? 
C45 C46 1.389(3) . ? 
C45 H45 0.9500 . ? 
C46 H46 0.9500 . ? 
C60 C61 1.474(3) . ? 
C60 H60 0.9500 . ? 
C61 C66 1.395(3) . ? 
C61 C62 1.397(3) . ? 
C62 C63 1.385(3) . ? 
C62 H62 0.9500 . ? 
C63 C64 1.386(3) . ? 
C63 H63 0.9500 . ? 
C64 C65 1.380(3) . ? 
C64 H64 0.9500 . ? 
C65 C66 1.388(3) . ? 
C65 H65 0.9500 . ? 
C66 H66 0.9500 . ? 
  
loop_ 
 _geom_angle_atom_site_label_1 
 _geom_angle_atom_site_label_2 
 _geom_angle_atom_site_label_3 
 _geom_angle 
 _geom_angle_site_symmetry_1 
 _geom_angle_site_symmetry_3 
 _geom_angle_publ_flag 
C2 N1 C6 117.92(18) . . ? 
C2 N1 C11 121.54(19) . . ? 
C6 N1 C11 117.43(18) . . ? 
O2 C2 N1 124.5(2) . . ? 
O2 C2 C3 120.6(2) . . ? 
N1 C2 C3 114.88(19) . . ? 
N4 C3 C2 108.45(18) . . ? 
N4 C3 C31 114.43(18) . . ? 
C2 C3 C31 111.77(18) . . ? 
N4 C3 H3 107.3 . . ? 
C2 C3 H3 107.3 . . ? 
C31 C3 H3 107.3 . . ? 
C5 N4 C41 121.78(18) . . ? 
C5 N4 C3 116.66(18) . . ? 
C41 N4 C3 120.49(18) . . ? 
O5 C5 N4 123.5(2) . . ? 
O5 C5 C6 122.2(2) . . ? 
N4 C5 C6 114.28(19) . . ? 
C60 C6 N1 125.6(2) . . ? 
C60 C6 C5 117.2(2) . . ? 
N1 C6 C5 117.07(19) . . ? 
N1 C11 C16 110.95(19) . . ? 
N1 C11 C12 114.62(19) . . ? 
C16 C11 C12 111.0(2) . . ? 
N1 C11 H11 106.6 . . ? 
C16 C11 H11 106.6 . . ? 
C12 C11 H11 106.6 . . ? 
C11 C12 C13 108.8(2) . . ? 
C11 C12 H12A 109.9 . . ? 
C13 C12 H12A 109.9 . . ? 
C11 C12 H12B 109.9 . . ? 
C13 C12 H12B 109.9 . . ? 
H12A C12 H12B 108.3 . . ? 
C14 C13 C12 111.5(2) . . ? 
C14 C13 H13A 109.3 . . ? 
C12 C13 H13A 109.3 . . ? 
C14 C13 H13B 109.3 . . ? 
C12 C13 H13B 109.3 . . ? 
H13A C13 H13B 108.0 . . ? 
C13 C14 C15 111.4(2) . . ? 
C13 C14 H14A 109.3 . . ? 
C15 C14 H14A 109.3 . . ? 
C13 C14 H14B 109.3 . . ? 
C15 C14 H14B 109.3 . . ? 
H14A C14 H14B 108.0 . . ? 
C16 C15 C14 111.0(2) . . ? 
C16 C15 H15A 109.4 . . ? 
C14 C15 H15A 109.4 . . ? 
C16 C15 H15B 109.4 . . ? 
C14 C15 H15B 109.4 . . ? 
H15A C15 H15B 108.0 . . ? 
C15 C16 C11 110.1(2) . . ? 
C15 C16 H16A 109.6 . . ? 
C11 C16 H16A 109.6 . . ? 
C15 C16 H16B 109.6 . . ? 
C11 C16 H16B 109.6 . . ? 
H16A C16 H16B 108.2 . . ? 
C36 C31 C32 118.6(2) . . ? 
C36 C31 C3 118.8(2) . . ? 
C32 C31 C3 122.6(2) . . ? 
C31 C32 C33 120.2(2) . . ? 
C31 C32 H32 119.9 . . ? 
C33 C32 H32 119.9 . . ? 
C34 C33 C32 121.2(2) . . ? 
C34 C33 H33 119.4 . . ? 
C32 C33 H33 119.4 . . ? 
C33 C34 C35 117.9(2) . . ? 
C33 C34 C38 121.6(2) . . ? 
C35 C34 C38 120.5(2) . . ? 
C36 C35 C34 121.2(2) . . ? 
C36 C35 H35 119.4 . . ? 
C34 C35 H35 119.4 . . ? 
C35 C36 C31 120.9(2) . . ? 
C35 C36 H36 119.6 . . ? 
C31 C36 H36 119.6 . . ? 
C34 C38 H38A 109.5 . . ? 
C34 C38 H38B 109.5 . . ? 
H38A C38 H38B 109.5 . . ? 
C34 C38 H38C 109.5 . . ? 
H38A C38 H38C 109.5 . . ? 
H38B C38 H38C 109.5 . . ? 
C46 C41 C42 120.0(2) . . ? 
C46 C41 N4 120.7(2) . . ? 
C42 C41 N4 119.3(2) . . ? 
C43 C42 C41 119.7(2) . . ? 
C43 C42 H42 120.2 . . ? 
C41 C42 H42 120.2 . . ? 
C44 C43 C42 120.4(2) . . ? 
C44 C43 H43 119.8 . . ? 
C42 C43 H43 119.8 . . ? 
C45 C44 C43 119.8(2) . . ? 
C45 C44 H44 120.1 . . ? 
C43 C44 H44 120.1 . . ? 
C44 C45 C46 120.5(3) . . ? 
C44 C45 H45 119.8 . . ? 
C46 C45 H45 119.8 . . ? 
C41 C46 C45 119.6(2) . . ? 
C41 C46 H46 120.2 . . ? 
C45 C46 H46 120.2 . . ? 
C6 C60 C61 129.4(2) . . ? 
C6 C60 H60 115.3 . . ? 
C61 C60 H60 115.3 . . ? 
C66 C61 C62 118.7(2) . . ? 
C66 C61 C60 118.4(2) . . ? 
C62 C61 C60 122.8(2) . . ? 
C63 C62 C61 120.4(2) . . ? 
C63 C62 H62 119.8 . . ? 
C61 C62 H62 119.8 . . ? 
C62 C63 C64 120.2(2) . . ? 
C62 C63 H63 119.9 . . ? 
C64 C63 H63 119.9 . . ? 
C65 C64 C63 120.0(2) . . ? 
C65 C64 H64 120.0 . . ? 
C63 C64 H64 120.0 . . ? 
C64 C65 C66 120.1(2) . . ? 
C64 C65 H65 120.0 . . ? 
C66 C65 H65 120.0 . . ? 
C65 C66 C61 120.6(2) . . ? 
C65 C66 H66 119.7 . . ? 
C61 C66 H66 119.7 . . ? 
  
loop_ 
 _geom_torsion_atom_site_label_1 
 _geom_torsion_atom_site_label_2 
 _geom_torsion_atom_site_label_3 
 _geom_torsion_atom_site_label_4 
 _geom_torsion 
 _geom_torsion_site_symmetry_1 
 _geom_torsion_site_symmetry_2 
 _geom_torsion_site_symmetry_3 
 _geom_torsion_site_symmetry_4 
 _geom_torsion_publ_flag 
C6 N1 C2 O2 173.1(2) . . . . ? 
C11 N1 C2 O2 13.6(3) . . . . ? 
C6 N1 C2 C3 -5.9(3) . . . . ? 
C11 N1 C2 C3 -165.46(19) . . . . ? 
O2 C2 C3 N4 -130.7(2) . . . . ? 
N1 C2 C3 N4 48.4(2) . . . . ? 
O2 C2 C3 C31 102.2(2) . . . . ? 
N1 C2 C3 C31 -78.7(2) . . . . ? 
C2 C3 N4 C5 -55.1(2) . . . . ? 
C31 C3 N4 C5 70.4(2) . . . . ? 
C2 C3 N4 C41 136.5(2) . . . . ? 
C31 C3 N4 C41 -97.9(2) . . . . ? 
C41 N4 C5 O5 6.8(3) . . . . ? 
C3 N4 C5 O5 -161.4(2) . . . . ? 
C41 N4 C5 C6 -173.6(2) . . . . ? 
C3 N4 C5 C6 18.2(3) . . . . ? 
C2 N1 C6 C60 151.0(2) . . . . ? 
C11 N1 C6 C60 -48.7(3) . . . . ? 
C2 N1 C6 C5 -33.3(3) . . . . ? 
C11 N1 C6 C5 127.1(2) . . . . ? 
O5 C5 C6 C60 22.9(3) . . . . ? 
N4 C5 C6 C60 -156.7(2) . . . . ? 
O5 C5 C6 N1 -153.2(2) . . . . ? 
N4 C5 C6 N1 27.2(3) . . . . ? 
C2 N1 C11 C16 66.8(3) . . . . ? 
C6 N1 C11 C16 -92.8(2) . . . . ? 
C2 N1 C11 C12 -59.9(3) . . . . ? 
C6 N1 C11 C12 140.4(2) . . . . ? 
N1 C11 C12 C13 -174.0(2) . . . . ? 
C16 C11 C12 C13 59.3(3) . . . . ? 
C11 C12 C13 C14 -57.1(3) . . . . ? 
C12 C13 C14 C15 55.3(3) . . . . ? 
C13 C14 C15 C16 -54.4(3) . . . . ? 
C14 C15 C16 C11 56.1(3) . . . . ? 
N1 C11 C16 C15 171.9(2) . . . . ? 
C12 C11 C16 C15 -59.5(3) . . . . ? 
N4 C3 C31 C36 -173.5(2) . . . . ? 
C2 C3 C31 C36 -49.7(3) . . . . ? 
N4 C3 C31 C32 8.0(3) . . . . ? 
C2 C3 C31 C32 131.7(2) . . . . ? 
C36 C31 C32 C33 0.0(3) . . . . ? 
C3 C31 C32 C33 178.5(2) . . . . ? 
C31 C32 C33 C34 -0.3(4) . . . . ? 
C32 C33 C34 C35 1.1(4) . . . . ? 
C32 C33 C34 C38 -177.5(2) . . . . ? 
C33 C34 C35 C36 -1.7(4) . . . . ? 
C38 C34 C35 C36 177.0(2) . . . . ? 
C34 C35 C36 C31 1.4(4) . . . . ? 
C32 C31 C36 C35 -0.5(4) . . . . ? 
C3 C31 C36 C35 -179.1(2) . . . . ? 
C5 N4 C41 C46 -137.5(2) . . . . ? 
C3 N4 C41 C46 30.2(3) . . . . ? 
C5 N4 C41 C42 44.5(3) . . . . ? 
C3 N4 C41 C42 -147.7(2) . . . . ? 
C46 C41 C42 C43 0.9(3) . . . . ? 
N4 C41 C42 C43 178.9(2) . . . . ? 
C41 C42 C43 C44 -0.8(4) . . . . ? 
C42 C43 C44 C45 0.1(4) . . . . ? 
C43 C44 C45 C46 0.5(4) . . . . ? 
C42 C41 C46 C45 -0.3(4) . . . . ? 
N4 C41 C46 C45 -178.2(2) . . . . ? 
C44 C45 C46 C41 -0.4(4) . . . . ? 
N1 C6 C60 C61 -7.9(4) . . . . ? 
C5 C6 C60 C61 176.3(2) . . . . ? 
C6 C60 C61 C66 145.5(2) . . . . ? 
C6 C60 C61 C62 -36.5(4) . . . . ? 
C66 C61 C62 C63 -2.9(4) . . . . ? 
C60 C61 C62 C63 179.1(2) . . . . ? 
C61 C62 C63 C64 0.4(4) . . . . ? 
C62 C63 C64 C65 1.9(4) . . . . ? 
C63 C64 C65 C66 -1.7(4) . . . . ? 
C64 C65 C66 C61 -0.8(4) . . . . ? 
C62 C61 C66 C65 3.2(3) . . . . ? 
C60 C61 C66 C65 -178.8(2) . . . . ? 
  
_refine_diff_density_max    0.198 
_refine_diff_density_min   -0.303 
_refine_diff_density_rms    0.051 
  
_shelx_res_file 
; 
  
    sba134.res created by SHELXL-2014/7 
  
  
TITL sba134 in P-1 
REM  sch�ne Messung, problemlose Struktur, aber nicht die Zielverbindung, 
REM  sondern ein Isomer, Wasserstoffatome gesehen, alle an konstruierten 
REM  Positionen ber�cksichtigt. 
REM 
REM 
REM 
CELL 0.71073   9.07170  11.03190  13.52500  89.2338  71.1596  75.6010 
ZERR    2.00   0.00110   0.00120   0.00180   0.0034   0.0033   0.0030 
LATT  1 
SFAC C H N O 
UNIT 60 60 4 4 
TEMP -163.000 
SIZE 0.11 0.16 0.19 
  
L.S. 4 
ACTA 
BOND $H 
CONF 
LIST 6 
FMAP 2 
PLAN 20 
WGHT    0.036600    0.530600 
FVAR       0.25002 
N1    3    0.536914    0.630897    0.739456    11.00000    0.01475    0.01589 = 
         0.02465    0.00145   -0.00467   -0.00581 
C2    1    0.462127    0.754037    0.769184    11.00000    0.01843    0.02165 = 
         0.02000    0.00182   -0.00662   -0.00455 
O2    4    0.317212    0.795038    0.816291    11.00000    0.01597    0.02886 = 
         0.02869   -0.00100   -0.00399   -0.00469 
C3    1    0.571830    0.842383    0.738143    11.00000    0.01546    0.01811 = 
         0.01972    0.00108   -0.00345   -0.00373 
AFIX  13 
H3    2    0.501046    0.929416    0.745036    11.00000   -1.20000 
AFIX   0 
N4    3    0.668857    0.813154    0.627316    11.00000    0.01851    0.01703 = 
         0.01798    0.00141   -0.00422   -0.00193 
C5    1    0.757482    0.691154    0.598088    11.00000    0.01854    0.02342 = 
         0.02124    0.00124   -0.00783   -0.00479 
O5    4    0.871578    0.659338    0.516938    11.00000    0.02449    0.02635 = 
         0.02159    0.00154   -0.00067   -0.00389 
C6    1    0.703652    0.599055    0.674602    11.00000    0.01508    0.02165 = 
         0.01982    0.00014   -0.00369   -0.00563 
C11   1    0.443387    0.536404    0.740901    11.00000    0.02088    0.02059 = 
         0.02987    0.00115   -0.01042   -0.00876 
AFIX  13 
H11   2    0.523933    0.453081    0.719021    11.00000   -1.20000 
AFIX   0 
C12   1    0.326508    0.524038    0.848218    11.00000    0.02600    0.03251 = 
         0.03431    0.00867   -0.00918   -0.01406 
AFIX  23 
H12A  2    0.240096    0.602898    0.871918    11.00000   -1.20000 
H12B  2    0.384174    0.507952    0.899885    11.00000   -1.20000 
AFIX   0 
C13   1    0.253382    0.415297    0.840200    11.00000    0.03463    0.03596 = 
         0.06042    0.01348   -0.01521   -0.01988 
AFIX  23 
H13A  2    0.339611    0.335917    0.821844    11.00000   -1.20000 
H13B  2    0.174445    0.408499    0.909072    11.00000   -1.20000 
AFIX   0 
C14   1    0.169730    0.433819    0.757795    11.00000    0.03536    0.04119 = 
         0.07578    0.00727   -0.02621   -0.02052 
AFIX  23 
H14A  2    0.075407    0.507649    0.780392    11.00000   -1.20000 
H14B  2    0.130199    0.359318    0.751400    11.00000   -1.20000 
AFIX   0 
C15   1    0.283647    0.453353    0.651377    11.00000    0.03949    0.03519 = 
         0.06581   -0.00323   -0.03242   -0.01406 
AFIX  23 
H15A  2    0.370384    0.375291    0.624323    11.00000   -1.20000 
H15B  2    0.223504    0.472169    0.601212    11.00000   -1.20000 
AFIX   0 
C16   1    0.357855    0.560661    0.659695    11.00000    0.02930    0.02994 = 
         0.03166    0.00249   -0.01529   -0.00995 
AFIX  23 
H16A  2    0.272356    0.640374    0.680103    11.00000   -1.20000 
H16B  2    0.435847    0.568595    0.590759    11.00000   -1.20000 
AFIX   0 
C31   1    0.669855    0.839956    0.811507    11.00000    0.02089    0.01704 = 
         0.02120    0.00176   -0.00658   -0.00551 
C32   1    0.834755    0.827335    0.775029    11.00000    0.02200    0.02517 = 
         0.02320    0.00229   -0.00715   -0.00656 
AFIX  43 
H32   2    0.891299    0.817803    0.701820    11.00000   -1.20000 
AFIX   0 
C33   1    0.918022    0.828582    0.845487    11.00000    0.02365    0.02591 = 
         0.03304    0.00263   -0.01302   -0.00632 
AFIX  43 
H33   2    1.031086    0.819467    0.819489    11.00000   -1.20000 
AFIX   0 
C34   1    0.838684    0.842876    0.952636    11.00000    0.03751    0.02341 = 
         0.03423    0.00794   -0.02024   -0.01307 
C35   1    0.674156    0.853748    0.987955    11.00000    0.03713    0.03471 = 
         0.02073    0.00262   -0.00905   -0.01504 
AFIX  43 
H35   2    0.617731    0.861395    1.061144    11.00000   -1.20000 
AFIX   0 
C36   1    0.590696    0.853666    0.918623    11.00000    0.02493    0.02468 = 
         0.02604    0.00143   -0.00533   -0.00879 
AFIX  43 
H36   2    0.477566    0.863139    0.944814    11.00000   -1.20000 
AFIX   0 
C38   1    0.925909    0.849442    1.028894    11.00000    0.05939    0.05419 = 
         0.05267    0.01250   -0.03421   -0.02412 
AFIX 137 
H38A  2    0.875183    0.928122    1.073119    11.00000   -1.50000 
H38B  2    1.038904    0.846153    0.990405    11.00000   -1.50000 
H38C  2    0.920593    0.778339    1.072948    11.00000   -1.50000 
AFIX   0 
C41   1    0.692947    0.911641    0.558889    11.00000    0.01729    0.02168 = 
         0.02472    0.00747   -0.00711   -0.00647 
C42   1    0.709077    0.891943    0.453899    11.00000    0.02130    0.02671 = 
         0.02710    0.00290   -0.01081   -0.00161 
AFIX  43 
H42   2    0.705986    0.813308    0.428009    11.00000   -1.20000 
AFIX   0 
C43   1    0.729617    0.987508    0.387560    11.00000    0.02409    0.03759 = 
         0.02630    0.01154   -0.01101   -0.00428 
AFIX  43 
H43   2    0.742061    0.973877    0.315781    11.00000   -1.20000 
AFIX   0 
C44   1    0.732140    1.102492    0.425015    11.00000    0.03326    0.03577 = 
         0.04087    0.01919   -0.01641   -0.01077 
AFIX  43 
H44   2    0.746097    1.167808    0.379165    11.00000   -1.20000 
AFIX   0 
C45   1    0.714342    1.122325    0.529199    11.00000    0.04280    0.02489 = 
         0.04953    0.01324   -0.02265   -0.01543 
AFIX  43 
H45   2    0.715173    1.201724    0.555029    11.00000   -1.20000 
AFIX   0 
C46   1    0.695210    1.026996    0.596617    11.00000    0.03569    0.02539 = 
         0.03189    0.00580   -0.01774   -0.01031 
AFIX  43 
H46   2    0.683746    1.040879    0.668195    11.00000   -1.20000 
AFIX   0 
C60   1    0.812371    0.490894    0.672424    11.00000    0.01676    0.02113 = 
         0.02310    0.00081   -0.00578   -0.00522 
AFIX  43 
H60   2    0.913813    0.479849    0.618865    11.00000   -1.20000 
AFIX   0 
C61   1    0.797552    0.386533    0.741004    11.00000    0.01624    0.01998 = 
         0.02600    0.00243   -0.00831   -0.00476 
C62   1    0.710742    0.404908    0.848108    11.00000    0.02649    0.02275 = 
         0.02514   -0.00078   -0.00884   -0.00314 
AFIX  43 
H62   2    0.659498    0.487640    0.879661    11.00000   -1.20000 
AFIX   0 
C63   1    0.698980    0.303162    0.908542    11.00000    0.03246    0.03175 = 
         0.02205    0.00612   -0.00526   -0.00501 
AFIX  43 
H63   2    0.639144    0.316332    0.981245    11.00000   -1.20000 
AFIX   0 
C64   1    0.774271    0.182140    0.863255    11.00000    0.02994    0.02606 = 
         0.03080    0.00841   -0.00859   -0.00735 
AFIX  43 
H64   2    0.763233    0.112435    0.904444    11.00000   -1.20000 
AFIX   0 
C65   1    0.865253    0.162961    0.758329    11.00000    0.02275    0.02314 = 
         0.03529    0.00402   -0.00646   -0.00589 
AFIX  43 
H65   2    0.919258    0.080134    0.727760    11.00000   -1.20000 
AFIX   0 
C66   1    0.877928    0.264530    0.697440    11.00000    0.01825    0.02357 = 
         0.02351    0.00132   -0.00423   -0.00438 
AFIX  43 
H66   2    0.941886    0.250871    0.625471    11.00000   -1.20000 
AFIX   0 
HKLF 4 
  
REM  sba134 in P-1 
REM R1 =  0.0557 for    3215 Fo > 4sig(Fo)  and  0.0846 for all    4388 data 
REM    308 parameters refined using      0 restraints 
  
END 
  
WGHT      0.0364      0.5370 
  
REM Highest difference peak  0.198,  deepest hole -0.303,  1-sigma level  0.051 
Q1    1   0.5139  0.3799  1.0792  11.00000  0.05    0.20 
Q2    1   0.6320  0.6105  0.7081  11.00000  0.05    0.19 
Q3    1   0.5239  0.8011  0.7571  11.00000  0.05    0.19 
Q4    1   0.7772  0.7257  1.0152  11.00000  0.05    0.18 
Q5    1   0.7749  1.2174  0.5452  11.00000  0.05    0.18 
Q6    1   0.7031  1.2447  0.4092  11.00000  0.05    0.18 
Q7    1   0.7927  0.5997  0.7515  11.00000  0.05    0.17 
Q8    1   0.9730  0.5598  0.5311  11.00000  0.05    0.17 
Q9    1   1.0817  0.7168  0.8681  11.00000  0.05    0.17 
Q10   1   0.8247  1.0365  0.4993  11.00000  0.05    0.17 
Q11   1   0.7231  0.5353  0.6450  11.00000  0.05    0.17 
Q12   1   0.6347  0.8285  0.6797  11.00000  0.05    0.17 
Q13   1   0.2268  0.9155  0.8744  11.00000  0.05    0.17 
Q14   1   0.8846  0.8620  0.3968  11.00000  0.05    0.17 
Q15   1   0.8944  0.9540  0.3578  11.00000  0.05    0.16 
Q16   1   0.5321  0.3194  1.0056  11.00000  0.05    0.16 
Q17   1   1.0517  0.8725  0.7966  11.00000  0.05    0.16 
Q18   1   0.6987  0.0007  0.9613  11.00000  0.05    0.16 
Q19   1   0.8523  0.8358  1.1402  11.00000  0.05    0.16 
Q20   1   0.3780  0.3308  0.8437  11.00000  0.05    0.16 
; 
_shelx_res_checksum    6878 
  
_shelx_hkl_file 
; 
  -1   0   0  112.21    2.09 
  -1   0   0  114.89    2.18 
  -1   0   0  115.04    1.60 
   1   0   0  113.23    1.60 
   1   0   0  111.22    2.08 
   1   0   0  114.89    2.17 
  -2   0   0  956.60   13.16 
  -2   0   0  973.84   12.50 
  -2   0   0  946.40   13.35 
   2   0   0 1000.00   13.45 
   2   0   0  943.78   11.93 
   2   0   0  953.09   13.14 
  -3   0   0   41.69    1.92 
  -3   0   0   42.05    1.02 
   3   0   0   41.92    1.03 
  -4   0   0   -0.07    0.36 
  -4   0   0   -0.21    0.31 
  -4   0   0    0.27    0.11 
   4   0   0    0.19    0.12 
  -5   0   0  153.48    2.58 
  -5   0   0  150.42    4.86 
  -5   0   0  149.76    4.58 
   5   0   0  150.09    2.58 
   5   0   0  154.58    2.64 
  -6   0   0    6.80    1.34 
  -6   0   0    7.43    1.28 
  -7   0   0   34.72    2.68 
  -7   0   0   36.34    2.46 
  -8   0   0   21.31    1.94 
  -8   0   0   21.72    2.24 
  -9   0   0    1.72    0.56 
  -9   0   0    0.95    0.52 
  -9   1   0    1.38    0.51 
  -9   1   0    1.03    0.59 
  -8   1   0    0.30    0.32 
  -8   1   0    0.44    0.38 
  -7   1   0    3.28    0.94 
  -7   1   0    2.20    0.74 
  -6   1   0    0.41    0.50 
  -6   1   0    0.49    0.41 
  -5   1   0   25.88    1.97 
  -5   1   0   27.31    1.94 
  -4   1   0    0.60    0.46 
  -4   1   0    0.21    0.40 
  -3   1   0  159.74    4.12 
  -3   1   0  165.72    4.20 
  -2   1   0   -0.10    0.33 
  -2   1   0   -0.11    0.33 
   1  -1   0   60.36    1.67 
   1  -1   0   60.94    1.55 
  -1   1   0   59.85    1.08 
  -1   1   0   59.77    1.67 
  -1   1   0   63.18    1.60 
  -1   1   0   61.01    1.08 
   0  -1   0    1.55    0.13 
   0  -1   0    1.66    0.14 
   0  -1   0    1.27    0.19 
   0   1   0    1.50    0.13 
   0   1   0    1.42    0.21 
   0   1   0    1.68    0.23 
  -1  -1   0   18.39    0.68 
  -1  -1   0   18.46    0.71 
  -1  -1   0   18.21    0.51 
   1   1   0   18.78    0.71 
   1   1   0   18.33    0.51 
   1   1   0   18.66    0.70 
  -2  -1   0    2.97    0.54 
  -2  -1   0    3.47    0.50 
   2   1   0    3.25    0.55 
   2   1   0    3.17    0.41 
   2   1   0    3.38    0.48 
  -3  -1   0    1.06    0.27 
  -3  -1   0    0.77    0.41 
  -3  -1   0    0.55    0.42 
   3   1   0    1.04    0.29 
  -4  -1   0    0.26    0.10 
  -4  -1   0   -0.32    0.29 
  -4  -1   0    0.12    0.27 
   4   1   0   -0.01    0.14 
  -5  -1   0    4.01    0.82 
  -5  -1   0    4.73    0.97 
  -5  -1   0    3.77    0.28 
   5   1   0    4.60    0.58 
  -6  -1   0    1.79    0.58 
  -6  -1   0    2.22    0.78 
   6   1   0    1.54    0.30 
  -7  -1   0    2.26    0.83 
  -7  -1   0    2.51    0.65 
  -8  -1   0    1.75    0.40 
  -8  -1   0    0.20    0.34 
  -9  -1   0    1.37    0.67 
  -9  -1   0   -0.02    0.35 
 -10  -1   0    0.88    0.35 
 -10  -1   0    0.39    0.47 
  -9   2   0   37.99    3.20 
  -9   2   0   34.16    2.97 
  -8   2   0    2.43    0.85 
  -8   2   0    1.26    0.56 
  -7   2   0   10.86    1.83 
  -7   2   0   12.01    1.89 
  -6   2   0    3.88    1.02 
  -6   2   0    3.35    0.85 
  -5   2   0    3.82    0.87 
  -5   2   0    3.84    0.90 
  -4   2   0   45.22    2.43 
  -4   2   0   46.12    2.41 
  -3   2   0   78.33    1.31 
  -3   2   0   81.97    1.34 
  -3   2   0   76.41    2.91 
  -3   2   0   78.05    2.83 
  -2   2   0  169.96    4.06 
  -2   2   0  171.87    2.74 
  -2   2   0  166.21    2.68 
  -2   2   0  162.92    3.74 
   1  -2   0    0.37    0.20 
   1  -2   0    0.12    0.14 
   1  -2   0    0.50    0.31 
  -1   2   0    0.39    0.21 
  -1   2   0    0.23    0.41 
  -1   2   0    0.59    0.30 
   0  -2   0    3.16    0.28 
   0  -2   0    2.78    0.26 
   0  -2   0    3.49    0.46 
   0   2   0    3.35    0.46 
   0   2   0    3.14    0.45 
  -1  -2   0   92.93    2.17 
  -1  -2   0   92.88    1.79 
   1   2   0   93.20    1.79 
   1   2   0   92.32    2.17 
   1   2   0   90.61    1.35 
  -2  -2   0    2.28    0.32 
  -2  -2   0    2.79    0.48 
  -2  -2   0    2.48    0.50 
   2   2   0    2.72    0.34 
   2   2   0    2.02    0.44 
   2   2   0    3.61    0.55 
  -3  -2   0   18.87    0.97 
  -3  -2   0   18.81    1.23 
   3   2   0   17.96    0.92 
   3   2   0   18.83    1.04 
  -4  -2   0    6.67    1.07 
  -4  -2   0    6.48    0.88 
   4   2   0    5.88    0.74 
  -5  -2   0   30.46    1.73 
  -5  -2   0   32.49    2.06 
   5   2   0   31.52    1.44 
  -6  -2   0   11.72    1.15 
  -6  -2   0   10.32    1.54 
   6   2   0   11.27    0.88 
  -7  -2   0    6.32    1.20 
  -7  -2   0    5.14    1.14 
  -8  -2   0    0.73    0.28 
  -8  -2   0    0.41    0.32 
  -9  -2   0    1.95    0.67 
  -9  -2   0    3.88    0.70 
 -10  -2   0   -0.22    0.42 
 -10  -2   0   -0.80    0.46 
  -9   3   0    1.02    0.44 
  -9   3   0    1.33    0.47 
  -8   3   0   23.65    2.32 
  -8   3   0   16.28    2.42 
  -7   3   0    2.59    0.99 
  -7   3   0    3.62    1.06 
  -6   3   0   44.33    2.91 
  -6   3   0   46.34    2.96 
  -5   3   0    0.32    0.26 
  -5   3   0   -0.25    0.29 
  -4   3   0   37.15    2.20 
  -4   3   0   39.56    2.40 
  -3   3   0    5.46    0.38 
  -3   3   0    6.31    1.03 
  -3   3   0    5.40    0.39 
  -3   3   0    5.22    1.03 
  -2   3   0    5.82    0.52 
  -2   3   0    6.88    1.07 
  -2   3   0    6.37    0.49 
  -2   3   0    7.01    0.91 
   1  -3   0   46.59    1.55 
   1  -3   0   55.17    1.63 
  -1   3   0   52.30    1.61 
  -1   3   0   53.07    2.00 
  -1   3   0   52.60    1.64 
   0  -3   0  570.24    7.49 
   0  -3   0  541.42    8.28 
   0  -3   0  556.20    7.39 
   0   3   0  544.87    8.07 
   0   3   0  560.01    8.34 
  -1  -3   0   20.04    0.69 
  -1  -3   0   19.57    0.75 
   1   3   0   19.47    0.69 
   1   3   0   19.92    0.73 
   1   3   0   19.75    1.14 
  -2  -3   0    4.62    0.62 
   2   3   0    4.79    0.25 
   2   3   0    5.65    0.80 
   2   3   0    5.37    0.26 
   2   3   0    5.89    0.59 
  -3  -3   0   27.34    0.97 
  -3  -3   0   26.41    1.43 
   3   3   0   27.93    0.96 
   3   3   0   29.16    1.48 
  -4  -3   0   27.41    1.27 
  -4  -3   0   25.54    1.64 
   4   3   0   26.41    1.16 
   4   3   0   29.19    1.53 
  -5  -3   0    0.76    0.39 
  -5  -3   0    0.81    0.31 
   5   3   0    0.10    0.21 
  -6  -3   0    3.32    0.73 
  -6  -3   0    4.74    0.99 
   6   3   0    4.18    0.74 
  -7  -3   0    1.15    0.39 
  -7  -3   0    2.28    0.84 
   7   3   0    0.94    0.25 
  -8  -3   0   14.95    1.39 
  -8  -3   0   14.14    2.12 
  -9  -3   0    0.21    0.29 
  -9  -3   0   -0.16    0.30 
 -10  -3   0    1.17    0.59 
  -8   4   0    0.66    0.50 
  -8   4   0    0.56    0.36 
  -7   4   0    6.06    1.28 
  -7   4   0    6.60    1.45 
  -6   4   0    1.31    0.60 
  -6   4   0    0.06    0.26 
  -5   4   0    4.70    1.08 
  -5   4   0    2.43    0.83 
  -4   4   0    2.47    0.71 
  -4   4   0    1.71    0.11 
  -4   4   0    4.28    1.05 
  -4   4   0    2.58    0.33 
  -3   4   0    1.57    0.59 
  -3   4   0    0.90    0.25 
  -3   4   0    1.04    0.10 
  -3   4   0    0.46    0.43 
  -2   4   0    9.03    0.90 
  -2   4   0    8.82    0.71 
  -2   4   0    8.98    1.25 
   1  -4   0    3.43    0.35 
  -1   4   0    3.44    0.77 
  -1   4   0    3.41    0.55 
  -1   4   0    4.11    0.65 
   0  -4   0  170.71    2.98 
   0  -4   0  166.50    2.91 
   0   4   0  161.64    3.78 
   0   4   0  165.92    3.61 
  -1  -4   0   10.93    0.66 
  -1  -4   0   10.17    0.57 
   1   4   0   10.09    0.93 
   1   4   0   10.54    0.56 
   1   4   0   10.00    0.65 
  -2  -4   0   28.10    1.16 
   2   4   0   26.43    1.51 
   2   4   0   27.82    0.61 
   2   4   0   27.27    1.14 
   2   4   0   27.11    0.62 
  -3  -4   0    2.51    0.58 
   3   4   0    2.36    0.20 
   3   4   0    2.39    0.21 
   3   4   0    2.32    0.61 
  -4  -4   0    6.34    0.50 
  -4  -4   0    6.45    0.97 
   4   4   0    5.98    0.95 
   4   4   0    5.58    0.44 
  -5  -4   0    0.55    0.34 
  -5  -4   0    0.26    0.17 
   5   4   0    0.07    0.25 
  -6  -4   0    0.74    0.44 
  -6  -4   0    1.39    0.43 
   6   4   0    1.27    0.42 
  -7  -4   0    0.97    0.34 
  -7  -4   0    0.02    0.28 
   7   4   0    0.64    0.34 
  -8  -4   0    7.41    1.14 
  -8  -4   0    8.40    1.61 
  -9  -4   0    1.23    0.61 
 -10  -4   0    5.74    1.45 
  -8   5   0    0.12    0.33 
  -8   5   0    0.91    0.48 
  -7   5   0   10.66    1.93 
  -7   5   0    8.45    1.76 
  -6   5   0   12.77    1.93 
  -6   5   0   13.48    2.20 
  -5   5   0    1.16    0.47 
  -5   5   0    0.63    0.43 
  -4   5   0    0.05    0.27 
  -4   5   0    0.27    0.10 
  -4   5   0    0.31    0.35 
  -3   5   0   78.54    2.35 
  -3   5   0   79.54    3.52 
  -3   5   0   79.46    3.08 
  -2   5   0    3.20    0.66 
  -2   5   0    4.29    0.67 
  -2   5   0    3.78    0.92 
   1  -5   0   71.49    2.10 
  -1   5   0   72.12    2.20 
  -1   5   0   69.22    2.44 
  -1   5   0   70.67    2.73 
   0  -5   0   36.59    1.20 
   0  -5   0   36.96    1.22 
   0   5   0   34.64    1.66 
   0   5   0   36.71    1.80 
  -1  -5   0   63.96    1.56 
  -1  -5   0   66.93    1.87 
   1   5   0   66.47    1.57 
   1   5   0   63.96    2.51 
   1   5   0   66.87    1.93 
  -2  -5   0   51.07    1.18 
  -2  -5   0   50.80    1.59 
   2   5   0   50.88    1.20 
   2   5   0   51.79    1.58 
   2   5   0   51.80    2.32 
  -3  -5   0  182.72    4.02 
   3   5   0  169.02    4.62 
  -4  -5   0    0.42    0.29 
   4   5   0    0.03    0.05 
   4   5   0    0.05    0.32 
   4   5   0   -0.06    0.05 
  -5  -5   0    8.30    1.22 
  -5  -5   0    6.06    0.50 
   5   5   0    5.64    0.39 
   5   5   0    6.89    1.12 
  -6  -5   0    2.44    0.42 
  -6  -5   0    3.80    0.94 
   6   5   0    3.42    0.77 
  -7  -5   0    7.04    1.32 
   7   5   0    5.34    1.04 
  -8  -5   0   16.20    2.27 
   8   5   0   17.06    1.47 
  -9  -5   0   -0.14    0.32 
 -10  -5   0    0.54    0.52 
  -7   6   0    0.19    0.32 
  -7   6   0   -0.02    0.39 
  -6   6   0    0.27    0.28 
  -6   6   0    0.61    0.45 
  -5   6   0    1.23    0.65 
  -5   6   0    0.19    0.27 
  -4   6   0   21.55    1.76 
  -4   6   0   21.66    2.01 
  -3   6   0    3.20    0.87 
  -3   6   0    3.54    0.80 
  -3   6   0    2.88    0.55 
  -2   6   0    0.35    0.27 
  -2   6   0    0.60    0.42 
  -2   6   0    0.52    0.26 
   1  -6   0    0.31    0.20 
  -1   6   0    0.12    0.22 
  -1   6   0    0.47    0.46 
   0  -6   0   77.28    1.99 
   0  -6   0   77.57    1.96 
   0   6   0   76.33    2.90 
   0   6   0   77.87    2.72 
  -1  -6   0   15.96    0.74 
  -1  -6   0   15.96    0.73 
   1   6   0   15.37    0.69 
   1   6   0   14.15    0.97 
   1   6   0   16.32    1.35 
  -2  -6   0    0.38    0.11 
  -2  -6   0    0.46    0.22 
   2   6   0    0.35    0.12 
   2   6   0    0.31    0.34 
   2   6   0    0.48    0.18 
  -3  -6   0   34.81    1.54 
   3   6   0   33.75    2.06 
  -4  -6   0   33.93    1.76 
   4   6   0   30.61    2.02 
  -5  -6   0    1.09    0.41 
   5   6   0    1.05    0.49 
  -6  -6   0   16.39    1.52 
   6   6   0   14.58    1.42 
  -7  -6   0    1.05    0.52 
   7   6   0    1.19    0.46 
  -8  -6   0    0.33    0.28 
   8   6   0    0.20    0.27 
  -9  -6   0   -0.36    0.30 
 -10  -6   0    0.64    0.41 
  -6   7   0    1.59    0.68 
  -6   7   0    2.14    0.66 
  -5   7   0    0.13    0.32 
  -5   7   0    0.29    0.27 
  -4   7   0    1.97    0.77 
  -4   7   0    3.28    0.86 
  -3   7   0    4.50    0.86 
  -3   7   0    5.90    1.29 
  -3   7   0    3.91    0.72 
   2  -7   0    2.62    0.55 
  -2   7   0    2.94    0.67 
  -2   7   0    1.95    0.67 
  -2   7   0    1.73    0.51 
   1  -7   0    6.75    0.63 
  -1   7   0    6.69    1.10 
  -1   7   0    6.70    1.02 
   0  -7   0   27.21    1.04 
   0  -7   0   26.93    1.11 
   0   7   0   27.08    1.68 
   0   7   0   27.07    1.78 
  -1  -7   0    7.74    0.52 
  -1  -7   0    8.38    0.51 
   1   7   0    8.43    0.82 
   1   7   0    8.64    1.24 
  -2  -7   0   54.08    1.59 
  -2  -7   0   58.00    1.68 
   2   7   0   61.48    2.89 
   2   7   0   57.65    1.63 
   2   7   0   58.40    1.77 
  -3  -7   0    0.46    0.20 
   3   7   0    0.47    0.36 
  -4  -7   0    0.15    0.16 
   4   7   0    0.57    0.42 
  -5  -7   0    0.35    0.21 
   5   7   0    0.19    0.30 
  -6  -7   0    8.75    1.40 
   6   7   0    7.67    1.36 
  -7  -7   0   18.12    1.67 
   7   7   0   17.37    1.68 
  -8  -7   0   -0.12    0.29 
   8   7   0   -0.36    0.24 
  -9  -7   0    8.95    1.67 
  -6   8   0    0.72    0.51 
  -5   8   0    0.24    0.35 
  -4   8   0    1.45    0.47 
   3  -8   0   -0.30    0.17 
  -3   8   0   -0.23    0.16 
  -3   8   0    0.95    0.48 
  -2   8   0    1.42    0.56 
  -2   8   0    0.92    0.43 
   1  -8   0    1.45    0.30 
  -1   8   0    1.42    0.68 
  -1   8   0    1.14    0.45 
   0  -8   0    1.05    0.16 
   0   8   0    1.93    0.60 
   0   8   0    1.39    0.51 
  -1  -8   0   17.27    0.73 
   1   8   0   16.53    1.52 
   1   8   0   18.67    1.27 
  -2  -8   0   37.59    1.27 
   2   8   0   38.84    2.41 
   2   8   0   36.82    1.50 
  -3  -8   0   15.28    0.92 
   3   8   0   13.51    1.78 
  -4  -8   0    6.04    0.81 
   4   8   0    8.42    1.44 
  -5  -8   0    2.78    0.64 
   5   8   0    3.21    0.92 
  -6  -8   0    8.54    1.28 
   6   8   0    7.33    1.37 
  -7  -8   0    0.90    0.34 
   7   8   0    0.12    0.24 
  -8  -8   0   -0.37    0.27 
   8   8   0    0.23    0.31 
  -9  -8   0    1.12    0.39 
   9   8   0   -0.02    0.30 
  -5   9   0    1.37    0.49 
  -4   9   0    2.45    0.76 
  -3   9   0    8.44    1.46 
  -2   9   0    1.53    0.40 
  -2   9   0    2.48    0.72 
  -1   9   0    5.92    1.21 
  -1   9   0    4.91    0.91 
   0   9   0   12.44    1.69 
   0   9   0   10.34    1.46 
   1   9   0    0.52    0.31 
   1   9   0    0.88    0.43 
   2   9   0   -0.14    0.21 
   3   9   0    2.36    0.73 
   4   9   0    7.23    1.40 
   5   9   0    3.96    1.04 
   6   9   0    4.81    1.23 
   7   9   0    7.22    1.39 
   8   9   0    2.01    0.52 
   9   9   0    1.37    0.46 
  -4  10   0    3.01    0.78 
  -3  10   0    3.76    1.03 
  -2  10   0    9.53    1.59 
  -2  10   0    6.57    1.09 
  -1  10   0    0.05    0.28 
  -1  10   0   -0.51    0.24 
   0  10   0    0.14    0.26 
   0  10   0    0.36    0.24 
   1  10   0   -0.02    0.27 
   2  10   0   94.44    4.33 
   3  10   0   21.86    2.01 
   4  10   0   64.33    3.71 
   5  10   0    2.75    0.81 
   6  10   0    1.42    0.69 
   7  10   0    4.17    1.07 
   8  10   0    0.55    0.33 
  -3  11   0   -0.06    0.38 
  -2  11   0    0.81    0.46 
  -1  11   0   13.62    1.82 
   0  11   0    1.48    0.43 
   1  11   0   22.74    2.02 
   2  11   0   -0.18    0.33 
   3  11   0    1.39    0.58 
   4  11   0    0.39    0.31 
   5  11   0    6.07    1.36 
   6  11   0    0.76    0.38 
   7  11   0    6.07    1.43 
   0  12   0    2.88    0.63 
   1  12   0    4.35    0.93 
   2  12   0    1.21    0.55 
   3  12   0    2.06    0.68 
   4  12   0    1.37    0.76 
   5  12   0    0.91    0.38 
   6  12   0    0.69    0.38 
   1  13   0    2.93    0.89 
   2  13   0    1.45    0.63 
   3  13   0   -0.20    0.45 
   4  13   0    2.77    0.75 
   3  13  -1   -0.90    0.33 
   2  13  -1    2.45    0.72 
   1  13  -1    6.40    1.18 
   6  12  -1   -0.58    0.36 
   5  12  -1    5.73    1.33 
   4  12  -1    2.78    0.96 
   3  12  -1    3.30    0.96 
   1  12  -1    9.13    1.66 
   0  12  -1    1.18    0.51 
  -1  12  -1    2.54    0.56 
   7  11  -1    0.64    0.42 
   6  11  -1    0.41    0.35 
   5  11  -1    0.73    0.58 
   4  11  -1    0.63    0.38 
   3  11  -1    0.47    0.31 
   2  11  -1    1.41    0.62 
   1  11  -1   10.85    1.71 
   0  11  -1    9.58    1.62 
  -1  11  -1    0.03    0.29 
  -2  11  -1    0.65    0.37 
  -3  11  -1    6.39    1.02 
   8  10  -1    8.80    1.52 
   7  10  -1   -0.10    0.28 
   6  10  -1    0.20    0.29 
   5  10  -1    6.24    1.44 
   4  10  -1    7.42    1.51 
   3  10  -1    9.15    1.62 
   2  10  -1   10.95    1.76 
   1  10  -1    8.11    1.44 
   0  10  -1   20.00    1.57 
   0  10  -1   23.44    1.94 
  -1  10  -1    4.31    0.98 
  -1  10  -1    3.45    0.77 
  -2  10  -1    0.74    0.33 
  -2  10  -1    1.08    0.38 
  -3  10  -1    0.97    0.44 
  -4  10  -1   -0.41    0.34 
   8   9  -1    2.84    0.72 
   7   9  -1   23.58    2.13 
   6   9  -1    4.31    1.06 
   5   9  -1   31.84    2.50 
   4   9  -1   -0.26    0.19 
   3   9  -1    4.27    1.01 
   2   9  -1   55.28    3.10 
   1   9  -1  227.73    6.66 
   1   9  -1  227.20    5.45 
   0   9  -1   24.49    1.92 
   0   9  -1   23.52    1.71 
  -1   9  -1   65.72    3.21 
  -1   9  -1   58.26    3.02 
  -2   9  -1    8.02    1.41 
  -2   9  -1    6.71    1.11 
  -3   9  -1    8.81    1.65 
  -4   9  -1    2.60    0.77 
  -5   9  -1    2.14    0.51 
  -9  -8   1    0.10    0.33 
   8   8  -1    0.39    0.28 
  -8  -8   1    0.03    0.30 
   7   8  -1    7.79    1.47 
  -7  -8   1    7.08    1.30 
   6   8  -1    5.95    1.30 
  -6  -8   1    4.82    0.91 
   5   8  -1   27.12    2.20 
  -5  -8   1   26.89    1.69 
   4   8  -1   42.55    2.69 
  -4  -8   1   43.68    1.88 
   3   8  -1    2.53    0.78 
  -3  -8   1    2.07    0.35 
   2   8  -1    8.95    1.37 
   2   8  -1   10.14    0.79 
   1   8  -1   19.15    1.30 
   1   8  -1   20.63    1.74 
   0   8  -1   10.92    1.47 
   0   8  -1   12.03    1.19 
  -1   8  -1    6.58    1.23 
  -1   8  -1    6.56    1.13 
  -2   8  -1   10.29    1.56 
  -2   8  -1    9.85    1.32 
  -3   8  -1    3.29    0.74 
  -3   8  -1    3.89    1.06 
  -4   8  -1   -0.33    0.31 
  -5   8  -1    1.57    0.64 
  -6   8  -1    1.44    0.40 
  -9  -7   1    2.71    0.62 
   8   7  -1    4.56    1.02 
  -8  -7   1    4.00    0.96 
   7   7  -1   11.83    1.77 
  -7  -7   1   10.51    1.59 
   6   7  -1    1.36    0.47 
  -6  -7   1    2.00    0.54 
   5   7  -1   -0.03    0.22 
  -5  -7   1    0.21    0.19 
   4   7  -1    8.36    1.35 
  -4  -7   1    7.63    0.77 
   3   7  -1    0.22    0.29 
   3   7  -1    0.18    0.07 
  -3  -7   1    0.39    0.18 
   2   7  -1    2.89    0.80 
   2   7  -1    2.81    0.23 
   2   7  -1    3.39    0.52 
  -2  -7   1    2.72    0.27 
   1   7  -1   25.16    1.38 
   1   7  -1   23.58    1.75 
   0   7  -1   52.48    2.32 
   0   7  -1   51.19    2.54 
   0  -7   1   51.14    1.10 
   0  -7   1   50.39    1.11 
  -1   7  -1    0.69    0.38 
  -1   7  -1    1.25    0.38 
   1  -7   1    1.09    0.24 
  -2   7  -1    0.64    0.40 
  -2   7  -1    0.53    0.28 
  -2   7  -1    1.03    0.38 
   2  -7   1    0.15    0.17 
  -3   7  -1   -0.13    0.17 
  -3   7  -1   -0.19    0.16 
  -3   7  -1    0.26    0.30 
  -4   7  -1   32.63    2.57 
  -4   7  -1   32.72    2.11 
  -5   7  -1    0.60    0.31 
  -5   7  -1    1.30    0.58 
  -6   7  -1    5.85    1.29 
  -6   7  -1    2.87    0.67 
  -7   7  -1    1.80    0.54 
  -9  -6   1   -1.07    0.33 
   8   6  -1   14.08    1.81 
  -8  -6   1   12.86    2.01 
   7   6  -1    4.01    0.91 
  -7  -6   1    4.65    1.06 
   6   6  -1   14.43    1.42 
  -6  -6   1   15.72    1.48 
   5   6  -1   39.92    1.22 
   5   6  -1   40.49    2.38 
  -5  -6   1   40.33    2.19 
   4   6  -1   38.89    2.27 
   4   6  -1   36.72    1.02 
   4   6  -1   38.14    1.01 
  -4  -6   1   39.11    1.91 
   3   6  -1   52.10    1.27 
   3   6  -1   51.49    2.58 
   3   6  -1   50.78    1.24 
  -3  -6   1   51.98    1.87 
   2   6  -1    0.92    0.28 
   2   6  -1    1.22    0.54 
   2   6  -1    0.87    0.21 
  -2  -6   1    0.70    0.23 
   1   6  -1   58.83    2.61 
   1   6  -1   65.15    2.12 
   0   6  -1   23.12    1.46 
   0   6  -1   24.93    1.61 
   0  -6   1   24.37    0.70 
   0  -6   1   23.92    0.69 
  -1   6  -1   65.08    2.76 
  -1   6  -1   66.97    2.64 
   1  -6   1   69.10    1.86 
   1  -6   1   65.92    1.83 
  -2   6  -1    0.28    0.23 
  -2   6  -1   -0.25    0.28 
  -2   6  -1    0.23    0.22 
  -3   6  -1    1.08    0.37 
  -3   6  -1    0.88    0.28 
  -3   6  -1    0.95    0.53 
  -4   6  -1    4.39    1.10 
  -4   6  -1    5.35    0.50 
  -4   6  -1    5.16    0.96 
  -5   6  -1    5.67    1.36 
  -5   6  -1    5.31    1.13 
  -6   6  -1    2.67    0.80 
  -6   6  -1    3.03    0.92 
  -7   6  -1    0.02    0.39 
  -7   6  -1    0.19    0.36 
  -9  -5   1    2.98    1.08 
  -8  -5   1    0.62    0.40 
   7   5  -1    4.57    0.96 
  -7  -5   1    4.24    1.01 
   6   5  -1    5.76    1.03 
  -6  -5   1    7.06    1.23 
  -6  -5   1    7.14    0.71 
   5   5  -1    1.17    0.47 
  -5  -5   1    2.04    0.62 
  -5  -5   1    1.66    0.38 
   4   5  -1   24.46    0.93 
   4   5  -1   23.93    0.96 
   4   5  -1   25.90    1.71 
  -4  -5   1   24.37    1.53 
   3   5  -1    0.28    0.15 
   3   5  -1   -0.04    0.06 
   3   5  -1    0.07    0.35 
  -3  -5   1    0.00    0.23 
   2   5  -1   33.12    1.85 
   2   5  -1   33.58    1.11 
   2   5  -1   33.03    1.18 
  -2  -5   1   33.80    1.22 
  -2  -5   1   34.25    1.02 
   1   5  -1   28.26    1.67 
   1   5  -1   29.27    0.70 
   1   5  -1   30.67    1.30 
  -1  -5   1   29.49    0.70 
  -1  -5   1   28.95    1.16 
   0   5  -1    3.08    0.70 
   0   5  -1    3.00    0.68 
   0  -5   1    2.95    0.22 
   0  -5   1    2.77    0.22 
  -1   5  -1    4.59    0.92 
  -1   5  -1    3.94    0.72 
  -1   5  -1    5.07    0.49 
   1  -5   1    4.05    0.39 
  -2   5  -1    2.51    0.57 
  -2   5  -1    2.38    0.70 
  -2   5  -1    2.52    0.55 
  -3   5  -1    3.63    0.94 
  -3   5  -1    4.60    0.84 
  -3   5  -1    5.18    0.71 
  -4   5  -1    1.81    0.57 
  -4   5  -1    0.86    0.26 
  -4   5  -1    1.39    0.61 
  -5   5  -1    0.48    0.38 
  -5   5  -1    0.21    0.38 
  -6   5  -1   -0.22    0.42 
  -6   5  -1    0.64    0.33 
  -7   5  -1    4.95    1.14 
  -7   5  -1    6.29    1.37 
  -8   5  -1    1.47    0.66 
  -8   5  -1    0.13    0.38 
  -9  -4   1    0.18    0.36 
  -8  -4   1   21.75    1.71 
  -8  -4   1   27.26    2.36 
   7   4  -1   11.26    1.37 
  -7  -4   1    9.91    1.35 
  -7  -4   1   11.61    1.73 
   6   4  -1    1.60    0.48 
  -6  -4   1    0.95    0.36 
  -6  -4   1    2.54    0.73 
   5   4  -1    6.42    1.01 
  -5  -4   1    8.70    1.29 
  -5  -4   1    6.08    0.84 
   4   4  -1   49.79    2.24 
   4   4  -1   52.21    1.67 
  -4  -4   1   51.77    1.73 
  -4  -4   1   50.98    2.30 
   3   4  -1   26.48    1.57 
   3   4  -1   27.66    0.94 
  -3  -4   1   26.92    1.44 
  -3  -4   1   27.86    1.03 
   2   4  -1   31.42    1.20 
   2   4  -1   31.73    1.68 
   2   4  -1   32.17    1.01 
   2   4  -1   32.56    1.01 
  -2  -4   1   32.00    1.24 
   1   4  -1    1.26    0.48 
   1   4  -1    1.27    0.34 
   1   4  -1    1.35    0.21 
  -1  -4   1    1.29    0.32 
  -1  -4   1    1.22    0.20 
   0   4  -1   95.47    2.56 
   0   4  -1   93.50    2.77 
   0  -4   1   93.89    1.47 
   0  -4   1   95.83    1.46 
  -1   4  -1   41.99    1.71 
  -1   4  -1   38.80    1.85 
  -1   4  -1   39.99    1.32 
   1  -4   1   40.01    1.28 
  -2   4  -1  143.06    3.32 
  -2   4  -1  141.37    3.44 
  -2   4  -1  140.94    4.10 
  -3   4  -1   27.44    1.92 
  -3   4  -1   29.04    1.68 
  -3   4  -1   27.88    1.24 
  -4   4  -1   21.86    1.84 
  -4   4  -1   18.87    0.86 
  -4   4  -1   23.57    1.03 
  -4   4  -1   23.51    1.70 
  -5   4  -1    5.39    1.23 
  -5   4  -1    7.49    1.34 
  -6   4  -1   18.79    2.46 
  -6   4  -1   12.73    1.86 
  -7   4  -1   20.75    2.07 
  -7   4  -1   16.51    2.41 
  -8   4  -1    1.88    0.70 
  -8   4  -1    4.25    1.15 
  -9  -3   1    0.58    0.65 
  -9  -3   1    0.74    0.36 
  -8  -3   1   -0.44    0.24 
  -8  -3   1    0.79    0.45 
   7   3  -1    7.36    0.97 
  -7  -3   1    7.00    1.15 
  -7  -3   1    7.56    1.43 
   6   3  -1   17.20    1.21 
  -6  -3   1   17.32    1.34 
  -6  -3   1   16.49    1.62 
   5   3  -1    6.43    0.90 
  -5  -3   1    5.25    0.88 
  -5  -3   1    6.14    1.10 
   4   3  -1   25.62    1.44 
  -4  -3   1   26.11    1.34 
  -4  -3   1   23.50    1.58 
   3   3  -1    0.45    0.31 
   3   3  -1    0.95    0.23 
  -3  -3   1    0.29    0.23 
  -3  -3   1    0.98    0.41 
   2   3  -1    3.42    0.42 
   2   3  -1    2.77    0.59 
   2   3  -1    2.77    0.34 
   2   3  -1    3.47    0.50 
  -2  -3   1    3.04    0.51 
   1   3  -1  144.81    2.38 
   1   3  -1  143.55    2.59 
   1   3  -1  142.58    3.32 
  -1  -3   1  143.74    2.58 
  -1  -3   1  143.09    2.38 
   0   3  -1  264.98    4.71 
   0   3  -1  262.62    4.44 
   0  -3   1  230.97    4.31 
  -1   3  -1    2.52    0.42 
  -1   3  -1    2.71    0.42 
  -1   3  -1    2.51    0.63 
  -1   3  -1    2.25    0.45 
   1  -3   1    3.14    0.44 
  -2   3  -1   98.08    2.34 
  -2   3  -1   92.78    3.05 
  -2   3  -1   95.45    2.31 
  -2   3  -1   93.70    2.63 
  -3   3  -1   29.03    1.10 
  -3   3  -1   30.29    1.88 
  -3   3  -1   29.15    1.10 
  -3   3  -1   28.34    1.67 
  -4   3  -1    9.86    0.54 
  -4   3  -1   10.12    1.38 
  -4   3  -1   11.79    1.62 
  -4   3  -1    9.47    0.53 
  -5   3  -1    3.74    0.95 
  -5   3  -1    3.75    0.93 
  -6   3  -1   11.30    1.75 
  -6   3  -1   10.10    1.62 
  -7   3  -1    1.02    0.53 
  -7   3  -1    0.77    0.57 
  -8   3  -1   -0.04    0.37 
  -8   3  -1   -0.63    0.26 
  -9   3  -1    0.37    0.54 
  -9   3  -1   -0.16    0.32 
  -9  -2   1    0.82    0.58 
  -9  -2   1    1.40    0.47 
  -8  -2   1    3.51    0.99 
  -8  -2   1    4.73    1.01 
  -7  -2   1   10.26    1.73 
  -7  -2   1    9.06    1.47 
   6   2  -1   18.52    1.11 
  -6  -2   1   18.73    1.53 
  -6  -2   1   19.15    1.77 
   5   2  -1   10.07    0.81 
  -5  -2   1   10.27    1.33 
  -5  -2   1   12.36    1.60 
   4   2  -1   29.33    1.37 
  -4  -2   1   28.35    1.80 
  -4  -2   1   30.16    1.59 
   3   2  -1   35.57    1.42 
   3   2  -1   35.94    1.46 
  -3  -2   1   36.15    1.74 
  -3  -2   1   36.66    1.50 
   2   2  -1   40.86    1.31 
   2   2  -1   38.27    1.46 
   2   2  -1   40.48    1.47 
   2   2  -1   38.20    1.40 
  -2  -2   1   38.53    1.48 
  -2  -2   1   37.28    1.38 
  -2  -2   1   39.65    1.29 
   1   2  -1  330.33    5.36 
   1   2  -1  329.56    4.77 
   1   2  -1  334.42    4.82 
   1   2  -1  322.30    4.61 
   1   2  -1  328.87    5.36 
  -1  -2   1  341.84    4.86 
  -1  -2   1  332.13    5.36 
   0   2  -1    1.08    0.35 
   0   2  -1    1.09    0.34 
   0   2  -1    1.02    0.32 
   0  -2   1    0.93    0.34 
   0  -2   1    1.19    0.30 
  -1   2  -1  601.30    8.10 
  -1   2  -1  585.80    8.76 
   1  -2   1  591.02    8.24 
   1  -2   1  578.59    8.73 
   1  -2   1  601.92    8.10 
  -2   2  -1    7.62    0.54 
  -2   2  -1    7.72    0.75 
  -2   2  -1    7.05    0.95 
   2  -2   1    8.47    0.67 
   2  -2   1    7.28    0.53 
  -3   2  -1    7.37    1.01 
  -3   2  -1    8.01    1.21 
  -3   2  -1    7.36    0.48 
   3  -2   1    7.33    0.48 
  -4   2  -1    5.30    1.03 
  -4   2  -1    4.06    0.96 
  -4   2  -1    5.64    0.35 
   4  -2   1    5.27    0.35 
  -5   2  -1    2.24    0.70 
  -5   2  -1    3.12    0.92 
  -6   2  -1    4.09    1.05 
  -6   2  -1    4.76    1.07 
  -7   2  -1   14.91    2.13 
  -7   2  -1   14.10    2.01 
  -8   2  -1    1.58    0.75 
  -8   2  -1    1.78    0.62 
  -9   2  -1    4.40    1.25 
  -9   2  -1    5.28    1.18 
  -9  -1   1    8.70    1.53 
  -9  -1   1    5.74    1.53 
  -8  -1   1    8.11    1.39 
  -8  -1   1    9.19    1.75 
  -7  -1   1    3.48    1.01 
   6   1  -1    0.32    0.09 
  -6  -1   1   -0.05    0.20 
  -6  -1   1    0.47    0.39 
   5   1  -1    0.58    0.09 
   5   1  -1    0.34    0.17 
  -5  -1   1    1.44    0.57 
  -5  -1   1    1.48    0.49 
   4   1  -1    9.42    0.64 
   4   1  -1   10.07    0.61 
  -4  -1   1   12.03    1.49 
  -4  -1   1   10.35    1.03 
   3   1  -1   11.20    0.65 
   3   1  -1   12.04    0.71 
  -3  -1   1   10.70    0.94 
  -3  -1   1   11.08    1.04 
  -3  -1   1   12.37    0.67 
   2   1  -1   64.22    1.61 
   2   1  -1   64.33    1.85 
   2   1  -1   63.48    1.58 
   2   1  -1   63.55    2.11 
  -2  -1   1   64.68    1.88 
  -2  -1   1   66.69    2.11 
   1   1  -1    8.77    0.55 
   1   1  -1    9.74    0.60 
   1   1  -1    9.32    0.56 
   1   1  -1    9.39    0.56 
  -1  -1   1    9.31    0.57 
  -1  -1   1    8.76    0.56 
  -1  -1   1    9.21    0.60 
   0   1  -1  101.78    1.94 
   0   1  -1   97.88    1.48 
   0   1  -1   97.25    1.80 
   0  -1   1   96.66    1.48 
   0  -1   1   98.85    1.92 
  -1   1  -1  305.08    4.58 
  -1   1  -1  309.60    4.89 
   1  -1   1  308.55    4.45 
   1  -1   1  310.61    4.89 
  -2   1  -1  425.99    5.83 
  -2   1  -1  415.83    6.91 
  -2   1  -1  420.15    6.78 
   2  -1   1  423.04    6.76 
   2  -1   1  419.98    5.80 
  -3   1  -1   14.88    1.22 
  -3   1  -1   14.84    1.16 
  -3   1  -1   15.10    0.62 
   3  -1   1   14.97    0.62 
  -4   1  -1   64.67    1.39 
  -4   1  -1   61.16    2.67 
  -4   1  -1   62.19    2.67 
   4  -1   1   62.16    1.40 
  -5   1  -1   29.31    0.81 
  -5   1  -1   29.60    1.98 
  -5   1  -1   30.83    2.09 
   5  -1   1   28.71    0.82 
  -6   1  -1   18.16    1.65 
  -6   1  -1   15.51    1.98 
  -7   1  -1   10.95    1.71 
  -7   1  -1    9.70    1.71 
  -8   1  -1    2.21    0.80 
  -8   1  -1    4.23    0.93 
  -9   1  -1    2.54    0.85 
  -9   1  -1    0.51    0.42 
  -9   0   1    3.03    0.79 
  -9   0   1    2.04    0.75 
  -8   0   1    1.89    0.65 
  -8   0   1    4.10    0.96 
  -7   0   1    8.30    1.42 
  -7   0   1    5.38    1.33 
  -6   0   1    0.53    0.28 
  -6   0   1   -0.08    0.26 
   5   0  -1    4.57    0.28 
   5   0  -1    4.95    0.26 
  -5   0   1    5.41    1.00 
  -5   0   1    3.99    0.92 
   4   0  -1   32.74    0.88 
   4   0  -1   32.90    0.89 
  -4   0   1   35.35    2.09 
   3   0  -1    1.96    0.25 
   3   0  -1    1.66    0.25 
  -3   0   1    1.22    0.50 
  -3   0   1    1.14    0.53 
   2   0  -1  297.61    4.06 
   2   0  -1  297.18    4.05 
   2   0  -1  274.77    5.53 
  -2   0   1  295.67    5.45 
  -2   0   1  295.64    5.30 
   1   0  -1  146.26    2.24 
   1   0  -1  145.97    2.86 
  -1   0   1  149.87    2.90 
  -1   0   1  146.87    2.23 
  -1   0   1  147.15    2.83 
  -1   0  -1   87.99    1.77 
  -1   0  -1   88.21    1.82 
   1   0   1   87.04    1.63 
   1   0   1   90.51    1.84 
   1   0   1   87.87    1.77 
  -2   0  -1    3.31    0.38 
  -2   0  -1    3.30    0.59 
  -2   0  -1    3.87    0.64 
   2   0   1    3.86    0.59 
   2   0   1    3.08    0.36 
   2   0   1    3.30    0.57 
  -3   0  -1   26.30    1.48 
  -3   0  -1   24.29    1.38 
  -3   0  -1   26.44    0.91 
   3   0   1   25.90    0.93 
  -4   0  -1    1.88    0.62 
  -4   0  -1    2.45    0.34 
  -4   0  -1    2.95    0.76 
   4   0   1    2.25    0.37 
  -5   0  -1   46.62    1.36 
  -5   0  -1   47.41    2.39 
  -5   0  -1   45.39    2.52 
   5   0   1   44.79    1.38 
  -6   0  -1    3.13    0.82 
  -6   0  -1    2.15    0.72 
   6   0   1    3.08    0.40 
  -7   0  -1   18.77    1.72 
  -7   0  -1   17.60    2.30 
  -8   0  -1    0.47    0.31 
  -8   0  -1    1.36    0.67 
  -9   0  -1    7.10    1.56 
  -9   0  -1    8.22    1.53 
 -10   0  -1    1.20    0.45 
 -10   0  -1    2.12    0.80 
  -9   1   1    0.76    0.49 
  -9   1   1   -0.61    0.37 
  -8   1   1   15.05    2.34 
  -8   1   1   11.28    2.01 
  -7   1   1    7.64    1.51 
  -7   1   1    5.37    1.32 
  -6   1   1    0.69    0.41 
  -6   1   1    1.01    0.42 
  -5   1   1    8.60    1.41 
  -5   1   1    8.92    1.41 
  -4   1   1   37.50    2.16 
  -4   1   1   38.06    2.21 
  -3   1   1    0.53    0.49 
  -3   1   1    1.20    0.57 
  -2   1   1    9.35    0.93 
  -2   1   1    7.41    0.96 
   1  -1  -1  408.07    5.44 
   1  -1  -1  419.87    6.56 
   1  -1  -1  429.10    6.52 
  -1   1   1  419.95    6.49 
  -1   1   1  415.57    5.45 
  -1   1   1  411.68    6.52 
   0  -1  -1  126.58    2.13 
   0  -1  -1  127.15    2.22 
   0  -1  -1  110.19    2.19 
   0   1   1  126.19    2.22 
   0   1   1  128.13    2.14 
   0   1   1  125.40    2.24 
  -1  -1  -1  214.12    3.41 
  -1  -1  -1  209.47    3.42 
  -1  -1  -1  209.79    2.98 
   1   1   1  213.67    3.43 
   1   1   1  212.65    2.99 
   1   1   1  213.17    3.42 
  -2  -1  -1   16.90    0.81 
  -2  -1  -1   17.11    0.79 
  -2  -1  -1   15.22    0.93 
   2   1   1   15.99    0.80 
   2   1   1   16.23    0.78 
   2   1   1   17.18    0.98 
  -3  -1  -1  584.93    8.76 
  -3  -1  -1  576.70    9.40 
   3   1   1  584.03    8.74 
   3   1   1  582.96    8.37 
  -4  -1  -1   22.09    1.38 
  -4  -1  -1   22.93    1.60 
  -4  -1  -1   21.89    0.95 
   4   1   1   22.09    1.07 
  -5  -1  -1   86.35    3.12 
  -5  -1  -1   92.21    3.60 
   5   1   1   91.61    2.40 
  -6  -1  -1   17.42    1.67 
  -6  -1  -1   17.54    1.47 
   6   1   1   17.39    1.01 
  -7  -1  -1    4.06    1.07 
  -7  -1  -1    4.20    0.93 
  -8  -1  -1   11.32    1.72 
  -8  -1  -1    9.52    1.75 
  -9  -1  -1   -0.21    0.32 
  -9  -1  -1    1.05    0.50 
 -10  -1  -1    0.22    0.39 
 -10  -1  -1    0.24    0.36 
  -9   2   1   -0.16    0.44 
  -9   2   1    0.49    0.42 
  -8   2   1   23.96    2.40 
  -8   2   1   26.09    2.44 
  -7   2   1   -0.26    0.33 
  -7   2   1    1.79    0.52 
  -6   2   1    5.77    1.23 
  -6   2   1    8.09    1.45 
  -5   2   1    0.84    0.47 
  -5   2   1    0.16    0.32 
  -4   2   1    2.10    0.71 
  -4   2   1    2.40    0.78 
  -3   2   1   15.87    1.41 
  -3   2   1   13.83    1.25 
   2  -2  -1   96.83    1.71 
  -2   2   1   98.32    1.74 
  -2   2   1   99.40    3.07 
  -2   2   1   95.68    2.92 
   1  -2  -1    0.23    0.18 
   1  -2  -1    0.02    0.19 
  -1   2   1    0.16    0.18 
  -1   2   1    0.22    0.34 
  -1   2   1    0.10    0.34 
   0  -2  -1  432.52    6.29 
   0  -2  -1  434.43    6.35 
   0  -2  -1  420.73    6.16 
   0   2   1  420.84    6.14 
   0   2   1  430.00    6.34 
   0   2   1  429.68    6.27 
  -1  -2  -1    2.27    0.43 
  -1  -2  -1    1.92    0.26 
  -1  -2  -1    1.84    0.35 
   1   2   1    1.66    0.24 
   1   2   1    1.83    0.43 
   1   2   1    2.27    0.38 
  -2  -2  -1  115.60    2.67 
  -2  -2  -1  114.82    1.92 
  -2  -2  -1  117.04    2.71 
   2   2   1  119.69    2.71 
   2   2   1  115.70    1.92 
   2   2   1  110.93    2.66 
  -3  -2  -1   38.22    1.30 
  -3  -2  -1   39.08    1.75 
   3   2   1   36.56    1.50 
   3   2   1   36.48    1.25 
  -4  -2  -1    7.40    1.08 
  -4  -2  -1    7.89    0.77 
   4   2   1    7.03    0.83 
  -5  -2  -1    0.16    0.31 
  -5  -2  -1    0.42    0.35 
   5   2   1    0.74    0.33 
  -6  -2  -1    0.54    0.32 
  -6  -2  -1    0.62    0.44 
   6   2   1    0.49    0.26 
  -7  -2  -1    7.15    1.22 
  -7  -2  -1    5.50    1.15 
   7   2   1    6.78    0.66 
  -8  -2  -1   13.44    2.03 
  -8  -2  -1   12.08    1.67 
  -9  -2  -1   17.50    1.61 
  -9  -2  -1   14.72    2.26 
 -10  -2  -1   -0.02    0.55 
 -10  -2  -1    1.06    0.37 
  -8   3   1    9.75    1.90 
  -8   3   1    9.38    1.97 
  -7   3   1    0.29    0.42 
  -7   3   1   -0.03    0.53 
  -6   3   1    2.97    0.86 
  -6   3   1    1.81    0.75 
  -5   3   1    8.90    1.51 
  -5   3   1    8.31    1.43 
  -4   3   1   38.28    2.40 
  -4   3   1   39.01    2.35 
  -3   3   1    0.85    0.53 
  -3   3   1    0.70    0.49 
  -3   3   1    0.84    0.16 
  -3   3   1    0.82    0.16 
   2  -3  -1  138.04    2.66 
  -2   3   1  136.95    3.70 
  -2   3   1  138.85    2.70 
  -2   3   1  136.62    3.98 
   1  -3  -1    0.48    0.20 
  -1   3   1    0.57    0.32 
  -1   3   1    0.20    0.41 
  -1   3   1    0.52    0.26 
   0  -3  -1   70.48    2.00 
   0  -3  -1   67.43    1.79 
   0  -3  -1   67.60    1.96 
   0   3   1   70.42    2.01 
   0   3   1   68.90    1.78 
   0   3   1   67.28    1.99 
  -1  -3  -1    4.42    0.52 
  -1  -3  -1    3.57    0.42 
   1   3   1    3.81    0.49 
   1   3   1    4.00    0.63 
   1   3   1    3.58    0.43 
  -2  -3  -1    0.66    0.35 
   2   3   1    0.63    0.39 
   2   3   1    0.91    0.32 
  -3  -3  -1   16.96    0.66 
  -3  -3  -1   15.60    1.10 
   3   3   1   16.29    0.66 
   3   3   1   16.61    1.15 
  -4  -3  -1   32.17    1.82 
  -4  -3  -1   30.78    1.25 
   4   3   1   29.69    1.18 
   4   3   1   29.25    1.59 
  -5  -3  -1    4.72    0.74 
  -5  -3  -1    4.15    0.91 
   5   3   1    6.47    0.92 
  -6  -3  -1    4.37    0.82 
  -6  -3  -1    5.47    1.07 
   6   3   1    4.78    0.81 
  -7  -3  -1    1.36    0.47 
  -7  -3  -1    1.91    0.61 
   7   3   1    1.53    0.43 
  -8  -3  -1    0.65    0.37 
  -8  -3  -1    0.24    0.25 
  -9  -3  -1   12.61    1.18 
  -9  -3  -1   12.10    2.05 
 -10  -3  -1    1.40    0.75 
  -8   4   1    1.97    0.89 
  -8   4   1    3.55    0.70 
  -7   4   1   -0.49    0.55 
  -7   4   1    0.36    0.37 
  -6   4   1   25.92    2.27 
  -6   4   1   26.74    2.34 
  -5   4   1   28.29    2.23 
  -5   4   1   29.26    2.36 
  -4   4   1    1.95    0.13 
  -4   4   1    1.65    0.66 
  -4   4   1    2.99    0.85 
  -3   4   1    9.17    0.55 
  -3   4   1    8.99    0.59 
  -3   4   1   10.14    1.52 
  -3   4   1    9.56    1.28 
   2  -4  -1   10.05    0.64 
  -2   4   1   11.04    0.76 
  -2   4   1   10.39    1.26 
  -2   4   1   11.38    1.43 
   1  -4  -1  257.56    4.96 
  -1   4   1  255.71    5.57 
  -1   4   1  262.72    4.92 
  -1   4   1  259.48    5.12 
   0  -4  -1   20.65    1.01 
   0  -4  -1   19.87    0.98 
   0   4   1   19.42    1.17 
   0   4   1   19.94    1.21 
  -1  -4  -1   16.58    0.82 
  -1  -4  -1   17.28    0.88 
   1   4   1   17.40    0.87 
   1   4   1   17.42    0.85 
   1   4   1   17.97    1.20 
  -2  -4  -1    3.25    0.53 
   2   4   1    2.75    0.63 
   2   4   1    4.04    0.55 
  -3  -4  -1  265.98    5.27 
   3   4   1  268.76    5.71 
  -4  -4  -1   60.17    1.47 
  -4  -4  -1   62.88    2.54 
   4   4   1   56.82    2.40 
   4   4   1   63.14    1.50 
  -5  -4  -1   14.74    0.88 
  -5  -4  -1   16.69    1.43 
   5   4   1   15.19    1.29 
   5   4   1   12.61    0.74 
  -6  -4  -1    0.36    0.16 
  -6  -4  -1    0.56    0.34 
   6   4   1    0.51    0.33 
  -7  -4  -1   20.76    1.90 
  -7  -4  -1   21.04    1.44 
   7   4   1   21.21    1.54 
  -8  -4  -1   15.95    2.18 
  -8  -4  -1   15.78    1.33 
   8   4   1   17.53    1.70 
  -9  -4  -1    3.40    1.00 
 -10  -4  -1    0.46    0.48 
  -7   5   1    3.17    1.04 
  -7   5   1    3.92    1.11 
  -6   5   1    6.28    1.45 
  -6   5   1    5.33    1.26 
  -5   5   1    2.21    0.79 
  -5   5   1    3.49    0.90 
  -4   5   1    0.68    0.34 
  -4   5   1    0.15    0.33 
  -3   5   1    1.30    0.59 
  -3   5   1    0.52    0.21 
  -3   5   1    0.47    0.41 
  -2   5   1   11.23    1.47 
  -2   5   1   11.78    0.90 
  -2   5   1   10.61    1.04 
   1  -5  -1   14.75    1.03 
  -1   5   1   15.87    1.36 
  -1   5   1   15.58    1.12 
   0  -5  -1  120.98    2.88 
   0  -5  -1  123.10    2.85 
   0   5   1  118.63    3.30 
   0   5   1  118.96    3.40 
  -1  -5  -1   24.64    1.05 
  -1  -5  -1   25.52    1.13 
   1   5   1   25.73    1.57 
   1   5   1   26.27    1.10 
   1   5   1   26.66    1.22 
  -2  -5  -1   64.73    1.40 
  -2  -5  -1   65.16    1.99 
   2   5   1   64.89    1.41 
   2   5   1   62.17    1.91 
   2   5   1   61.66    2.54 
  -3  -5  -1   30.65    1.51 
   3   5   1   30.67    1.85 
  -4  -5  -1   24.23    1.55 
   4   5   1   25.12    1.71 
  -5  -5  -1    2.72    0.37 
  -5  -5  -1    2.62    0.69 
   5   5   1    2.53    0.23 
   5   5   1    3.36    0.77 
  -6  -5  -1    1.67    0.61 
  -6  -5  -1    1.35    0.33 
   6   5   1    1.78    0.57 
  -7  -5  -1    6.63    1.27 
   7   5   1    8.06    1.30 
  -8  -5  -1    4.38    1.10 
   8   5   1    2.94    0.74 
  -9  -5  -1    9.97    1.83 
 -10  -5  -1   -0.58    0.40 
  -7   6   1    0.27    0.36 
  -7   6   1    1.47    0.55 
  -6   6   1    1.06    0.54 
  -6   6   1    0.98    0.52 
  -5   6   1    6.64    1.29 
  -5   6   1    6.49    1.43 
  -4   6   1   14.75    2.18 
  -4   6   1   11.10    1.60 
  -3   6   1    9.11    1.37 
  -3   6   1    8.54    0.73 
  -3   6   1    8.60    1.48 
   2  -6  -1    0.65    0.33 
  -2   6   1   -0.05    0.22 
  -2   6   1    0.39    0.38 
  -2   6   1    0.45    0.24 
   1  -6  -1    3.04    0.63 
  -1   6   1    2.47    0.62 
  -1   6   1    2.34    0.69 
   0  -6  -1    5.68    0.71 
   0   6   1    5.61    0.94 
   0   6   1    4.48    0.83 
  -1  -6  -1   27.89    1.21 
   1   6   1   28.36    1.40 
   1   6   1   29.00    1.18 
   1   6   1   30.47    1.83 
  -2  -6  -1    3.69    0.57 
  -2  -6  -1    3.13    0.39 
   2   6   1    3.15    0.44 
   2   6   1    3.20    0.77 
  -3  -6  -1   12.15    0.95 
   3   6   1   11.90    1.47 
  -4  -6  -1   10.19    0.96 
   4   6   1   11.39    1.51 
  -5  -6  -1    8.21    1.21 
   5   6   1    7.39    1.22 
  -6  -6  -1    4.21    0.91 
   6   6   1    3.47    0.87 
  -7  -6  -1   11.51    1.67 
   7   6   1   10.22    1.50 
  -8  -6  -1    0.84    0.35 
   8   6   1    1.85    0.50 
  -9  -6  -1   -0.64    0.26 
 -10  -6  -1    0.98    0.42 
  -6   7   1    1.57    0.40 
  -6   7   1    1.39    0.50 
  -5   7   1    4.13    1.14 
  -5   7   1    3.56    0.89 
  -4   7   1    9.41    1.52 
  -4   7   1    6.93    1.42 
   3  -7  -1    0.25    0.26 
  -3   7   1    0.60    0.34 
  -3   7   1    0.34    0.16 
  -3   7   1    0.69    0.46 
   2  -7  -1    1.20    0.41 
  -2   7   1    2.32    0.76 
  -2   7   1    2.35    0.56 
   1  -7  -1    0.28    0.18 
  -1   7   1   -0.18    0.22 
  -1   7   1    0.55    0.25 
   0  -7  -1    0.56    0.23 
   0   7   1    0.59    0.34 
   0   7   1    1.45    0.45 
  -1  -7  -1    1.03    0.29 
   1   7   1    1.71    0.47 
   1   7   1    2.39    0.69 
  -2  -7  -1    6.27    0.61 
  -2  -7  -1    4.28    0.36 
   2   7   1    6.29    0.55 
   2   7   1    6.67    1.11 
  -3  -7  -1   35.39    1.61 
   3   7   1   32.86    2.16 
  -4  -7  -1    6.86    0.96 
   4   7   1    5.06    1.07 
  -5  -7  -1    1.27    0.45 
   5   7   1    1.13    0.52 
  -6  -7  -1    8.14    1.28 
   6   7   1    7.78    1.39 
  -7  -7  -1   -0.11    0.23 
   7   7   1   -0.39    0.22 
  -8  -7  -1    1.89    0.72 
   8   7   1    0.75    0.42 
  -9  -7  -1    1.36    0.87 
   9   7   1    2.48    0.63 
  -5   8   1    7.55    1.51 
   4  -8  -1    0.22    0.23 
  -4   8   1   -0.21    0.41 
   3  -8  -1    4.70    0.94 
  -3   8   1    5.87    1.22 
   2  -8  -1    0.02    0.16 
  -2   8   1   -0.26    0.17 
  -2   8   1    0.69    0.34 
   1  -8  -1    6.97    0.96 
  -1   8   1    5.76    1.19 
  -1   8   1    7.58    1.14 
   0  -8  -1    1.74    0.40 
   0   8   1    1.21    0.47 
   0   8   1    1.48    0.51 
  -1  -8  -1   40.93    1.58 
   1   8   1   36.21    1.84 
   1   8   1   40.56    2.41 
  -2  -8  -1    0.03    0.15 
   2   8   1    0.06    0.12 
   2   8   1   -0.43    0.17 
  -3  -8  -1    4.16    0.67 
   3   8   1    4.15    1.01 
  -4  -8  -1    0.60    0.30 
   4   8   1    0.55    0.42 
  -5  -8  -1    6.15    0.96 
   5   8   1    7.30    1.36 
  -6  -8  -1    5.34    0.98 
   6   8   1    7.18    1.40 
  -7  -8  -1    8.40    1.37 
   7   8   1   10.01    1.62 
  -8  -8  -1    2.18    0.60 
   8   8   1    0.93    0.52 
  -9  -8  -1   22.28    2.06 
   9   8   1   19.59    1.84 
  -5   9   1    1.08    0.41 
  -4   9   1    0.05    0.31 
  -3   9   1   -0.01    0.31 
  -2   9   1    6.08    1.02 
  -2   9   1    5.11    1.13 
  -1   9   1    1.66    0.67 
  -1   9   1    2.55    0.66 
   0   9   1   27.86    2.06 
   0   9   1   29.63    1.96 
   1   9   1   30.89    1.80 
   1   9   1   28.36    2.13 
   2   9   1    2.66    0.78 
   3   9   1   11.02    1.71 
   4   9   1   22.33    2.02 
  -5  -9  -1    0.12    0.15 
   5   9   1    0.16    0.30 
  -6  -9  -1    1.71    0.37 
   6   9   1    1.04    0.50 
  -7  -9  -1    2.23    0.44 
   7   9   1    1.87    0.72 
  -8  -9  -1    0.74    0.28 
   8   9   1    0.47    0.33 
   9   9   1    1.94    0.47 
  -4  10   1   -0.26    0.41 
  -3  10   1    3.73    1.05 
  -2  10   1    0.86    0.40 
  -1  10   1    0.23    0.25 
  -1  10   1    0.03    0.32 
   0  10   1   -0.45    0.23 
   0  10   1    0.00    0.26 
   1  10   1   12.55    1.81 
   2  10   1   22.99    2.02 
   3  10   1   11.73    1.74 
   4  10   1    0.58    0.53 
   5  10   1    6.95    1.42 
   6  10   1    0.16    0.32 
   7  10   1    1.14    0.37 
   8  10   1    0.30    0.37 
  -2  11   1    5.91    1.12 
  -1  11   1    2.59    0.53 
   0  11   1   -0.34    0.31 
   1  11   1    7.74    1.41 
   2  11   1    6.07    1.28 
   3  11   1   12.57    1.94 
   4  11   1    6.46    1.43 
   5  11   1    9.32    1.70 
   6  11   1    0.50    0.29 
   7  11   1    0.97    0.44 
   0  12   1    1.92    0.40 
   1  12   1    6.00    1.32 
   2  12   1   -0.77    0.50 
   3  12   1   -0.95    0.28 
   4  12   1    0.39    0.44 
   5  12   1    0.85    0.33 
   6  12   1    0.64    0.40 
   2  13   1    1.59    0.44 
   3  13   1    0.01    0.38 
   4  13   1    0.98    0.41 
   3  13  -2    0.43    0.39 
   2  13  -2    0.28    0.40 
   5  12  -2    4.10    0.94 
   4  12  -2    0.89    0.45 
   3  12  -2   -0.09    0.56 
   2  12  -2    0.68    0.37 
   1  12  -2    2.69    0.83 
   0  12  -2    1.10    0.36 
  -1  12  -2    1.25    0.37 
   7  11  -2    5.23    1.20 
   5  11  -2    1.12    0.40 
   4  11  -2    1.83    0.56 
   3  11  -2    1.10    0.52 
   2  11  -2   -0.72    0.34 
   1  11  -2    4.11    1.10 
   0  11  -2    3.30    0.72 
  -1  11  -2    0.92    0.35 
  -2  11  -2   15.69    1.35 
  -2  11  -2   14.97    1.52 
  -3  11  -2    4.76    0.94 
   7  10  -2    1.41    0.38 
   6  10  -2    2.69    0.69 
   5  10  -2    0.60    0.37 
   4  10  -2    1.91    0.76 
   3  10  -2    0.50    0.44 
   2  10  -2    8.95    1.62 
   1  10  -2   20.12    2.42 
   0  10  -2    0.76    0.28 
   0  10  -2   -0.07    0.25 
  -1  10  -2    8.42    1.43 
  -1  10  -2    6.33    1.22 
  -2  10  -2    1.83    0.50 
  -2  10  -2    2.90    0.72 
  -3  10  -2    4.05    0.94 
  -4  10  -2    2.41    0.72 
   8   9  -2   -0.65    0.27 
   7   9  -2    7.87    1.57 
   6   9  -2    0.03    0.23 
   5   9  -2    7.63    1.52 
   4   9  -2    9.63    1.58 
   3   9  -2    1.83    0.64 
   2   9  -2  111.26    4.59 
   1   9  -2    4.72    1.04 
   1   9  -2    2.59    0.65 
   0   9  -2  150.70    5.27 
   0   9  -2  148.98    4.68 
  -1   9  -2   -0.45    0.23 
  -1   9  -2   -0.41    0.24 
  -2   9  -2   15.23    1.83 
  -2   9  -2   14.54    1.51 
  -3   9  -2    9.31    1.30 
  -3   9  -2   13.12    2.06 
  -4   9  -2    1.16    0.44 
  -5   9  -2    8.73    1.73 
   8   8  -2    2.03    0.46 
  -8  -8   2    1.57    0.29 
   7   8  -2    4.05    1.03 
  -7  -8   2    3.53    0.92 
   6   8  -2    4.36    1.01 
  -6  -8   2    4.41    0.87 
   5   8  -2    0.12    0.40 
  -5  -8   2   -0.14    0.18 
   4   8  -2    2.26    0.78 
  -4  -8   2    2.27    0.41 
   3   8  -2    0.33    0.26 
   2   8  -2   21.03    1.80 
   2   8  -2   21.05    1.20 
   1   8  -2    5.91    1.12 
   1   8  -2    8.10    1.08 
   0   8  -2    2.16    0.62 
   0   8  -2    2.03    0.64 
  -1   8  -2   -0.14    0.30 
  -1   8  -2    0.02    0.32 
  -2   8  -2   13.18    1.81 
  -2   8  -2   12.61    1.58 
  -3   8  -2    4.00    0.75 
  -3   8  -2    7.15    1.46 
  -4   8  -2   16.02    2.34 
  -5   8  -2    0.62    0.41 
  -6   8  -2    1.92    0.71 
  -9  -7   2   22.28    2.11 
   8   7  -2   14.22    1.89 
  -8  -7   2   14.72    2.05 
   7   7  -2   16.83    1.62 
  -7  -7   2   15.01    1.54 
   6   7  -2    1.45    0.52 
  -6  -7   2    1.34    0.38 
   5   7  -2   43.04    2.63 
  -5  -7   2   43.64    2.30 
   4   7  -2   25.59    1.99 
  -4  -7   2   26.43    1.53 
   3   7  -2   15.42    1.50 
   3   7  -2   15.77    0.85 
  -3  -7   2   15.98    0.94 
   2   7  -2   30.15    2.03 
   2   7  -2   26.98    0.75 
   2   7  -2   25.15    1.25 
  -2  -7   2   26.95    0.79 
   1   7  -2    6.28    0.91 
   1   7  -2    6.35    1.17 
   0   7  -2   16.62    1.45 
   0   7  -2   15.93    1.30 
  -1   7  -2   39.64    2.20 
  -1   7  -2   42.90    2.31 
   1  -7   2   36.31    1.03 
   1  -7   2   38.91    1.08 
  -2   7  -2    2.71    0.50 
  -2   7  -2    3.81    0.94 
  -2   7  -2    2.39    0.55 
  -3   7  -2    8.90    1.21 
  -3   7  -2    8.73    0.89 
  -3   7  -2    9.63    1.62 
  -4   7  -2    1.34    0.66 
  -4   7  -2    1.47    0.42 
  -5   7  -2    0.07    0.33 
  -5   7  -2    0.16    0.24 
  -6   7  -2    1.32    0.56 
  -7   7  -2    6.15    1.53 
  -9  -6   2    0.93    0.44 
  -8  -6   2    1.48    0.47 
   7   6  -2    2.31    0.66 
  -7  -6   2    2.61    0.66 
   6   6  -2    9.87    1.48 
  -6  -6   2    6.51    1.15 
   5   6  -2    2.89    0.80 
   5   6  -2    1.96    0.35 
  -5  -6   2    2.46    0.63 
   4   6  -2    2.52    0.72 
   4   6  -2    2.94    0.45 
  -4  -6   2    2.63    0.61 
   3   6  -2   11.17    1.51 
   3   6  -2   11.37    0.67 
   3   6  -2   11.40    0.72 
  -3  -6   2   11.71    0.87 
   2   6  -2    0.55    0.15 
   2   6  -2    0.45    0.24 
   2   6  -2    1.45    0.56 
  -2  -6   2    0.81    0.20 
   1   6  -2    6.58    1.09 
   1   6  -2    6.19    0.86 
   0   6  -2    1.96    0.57 
   0   6  -2    2.39    0.65 
  -1   6  -2   -0.16    0.33 
  -1   6  -2    0.13    0.17 
   1  -6   2    0.12    0.12 
   1  -6   2    0.26    0.08 
  -2   6  -2    1.23    0.35 
  -2   6  -2    1.24    0.45 
  -2   6  -2    0.98    0.55 
  -3   6  -2   16.55    1.63 
  -3   6  -2   14.94    1.17 
  -3   6  -2   15.09    1.16 
  -4   6  -2    2.53    0.83 
  -4   6  -2    2.64    0.52 
  -4   6  -2    3.16    0.74 
  -5   6  -2    4.97    1.23 
  -5   6  -2    5.77    1.09 
  -6   6  -2    0.83    0.38 
  -6   6  -2    0.90    0.58 
  -7   6  -2   -0.50    0.30 
  -7   6  -2   -0.53    0.40 
  -9  -5   2    1.81    0.55 
  -8  -5   2    7.09    1.54 
   7   5  -2   24.29    1.77 
  -7  -5   2   25.07    2.11 
   6   5  -2    9.94    1.40 
  -6  -5   2    8.25    0.85 
  -6  -5   2    9.54    1.47 
   5   5  -2    5.28    1.00 
  -5  -5   2    6.55    0.66 
  -5  -5   2    6.60    1.14 
   4   5  -2    1.39    0.49 
   4   5  -2    1.10    0.29 
  -4  -5   2    1.27    0.44 
   3   5  -2    9.90    1.28 
   3   5  -2   11.11    0.73 
   3   5  -2   11.06    0.67 
  -3  -5   2   11.91    0.93 
   2   5  -2  240.11    4.41 
   2   5  -2  249.86    4.29 
   2   5  -2  241.58    4.38 
   2   5  -2  249.06    5.78 
  -2  -5   2  245.01    4.31 
   1   5  -2   15.61    1.02 
   1   5  -2   15.46    1.28 
   0   5  -2   96.58    2.89 
   0   5  -2   94.84    3.12 
  -1   5  -2    0.92    0.38 
  -1   5  -2    1.27    0.58 
  -1   5  -2    1.18    0.24 
   1  -5   2    1.37    0.24 
  -2   5  -2   41.97    1.66 
  -2   5  -2   44.23    1.94 
  -2   5  -2   42.02    2.30 
  -3   5  -2    0.05    0.34 
  -3   5  -2    0.00    0.20 
  -3   5  -2    0.30    0.22 
  -4   5  -2    2.63    0.55 
  -4   5  -2    2.72    0.70 
  -4   5  -2    1.61    0.70 
  -5   5  -2    8.38    1.60 
  -5   5  -2   10.49    1.47 
  -6   5  -2   15.55    2.34 
  -6   5  -2   15.74    2.08 
  -7   5  -2    3.40    0.91 
  -7   5  -2    8.31    1.68 
  -8   5  -2    0.59    0.69 
  -8   5  -2    0.00    0.69 
  -9  -4   2    1.91    0.77 
  -8  -4   2   -0.11    0.28 
  -8  -4   2    0.88    0.50 
   7   4  -2    6.02    0.97 
  -7  -4   2    6.78    1.40 
  -7  -4   2    5.45    0.98 
   6   4  -2    0.21    0.21 
  -6  -4   2   -0.14    0.23 
  -6  -4   2    0.41    0.21 
   5   4  -2   52.20    2.38 
  -5  -4   2   50.25    2.63 
  -5  -4   2   50.86    2.19 
   4   4  -2    5.31    0.90 
  -4  -4   2    6.38    0.82 
  -4  -4   2    5.85    1.00 
   3   4  -2   13.10    1.16 
   3   4  -2   12.17    0.77 
  -3  -4   2   12.17    0.84 
  -3  -4   2   11.81    0.97 
   2   4  -2    5.08    0.47 
   2   4  -2    4.62    0.44 
   2   4  -2    3.89    0.79 
   2   4  -2    5.02    0.62 
  -2  -4   2    4.43    0.60 
   1   4  -2   53.86    1.19 
   1   4  -2   51.79    2.12 
   1   4  -2   50.72    1.68 
  -1  -4   2   53.90    1.20 
  -1  -4   2   54.07    1.63 
   0   4  -2   78.54    2.37 
   0   4  -2   77.44    2.57 
  -1   4  -2   11.73    0.62 
  -1   4  -2   11.49    1.10 
  -1   4  -2   11.24    0.96 
   1  -4   2   13.23    0.65 
  -2   4  -2   21.80    1.24 
  -2   4  -2   21.65    1.59 
  -2   4  -2   22.39    1.17 
  -3   4  -2    0.12    0.17 
  -3   4  -2   -0.23    0.19 
  -3   4  -2    0.09    0.44 
  -4   4  -2    2.25    0.74 
  -4   4  -2    1.41    0.34 
  -4   4  -2    1.76    0.57 
  -5   4  -2    3.22    0.91 
  -5   4  -2    2.01    0.71 
  -5   4  -2    2.55    0.37 
  -6   4  -2    0.61    0.55 
  -6   4  -2    0.67    0.44 
  -7   4  -2    5.96    1.36 
  -8   4  -2    1.93    0.92 
  -8   4  -2    0.46    0.47 
  -9  -3   2    3.06    0.62 
  -9  -3   2    3.39    1.04 
  -8  -3   2    1.09    0.40 
  -8  -3   2   -0.32    0.27 
  -7  -3   2   13.87    2.05 
  -7  -3   2   13.30    1.30 
   6   3  -2    3.02    0.65 
  -6  -3   2    3.42    0.87 
  -6  -3   2    3.16    0.72 
   5   3  -2    2.25    0.53 
  -5  -3   2    3.27    0.71 
  -5  -3   2    3.14    0.78 
   4   3  -2    7.03    0.95 
  -4  -3   2    5.46    0.83 
  -4  -3   2    6.05    1.03 
   3   3  -2   16.15    1.14 
  -3  -3   2   16.83    1.07 
  -3  -3   2   17.19    1.23 
   2   3  -2   10.98    0.73 
   2   3  -2   11.85    0.72 
   2   3  -2   10.68    0.91 
   2   3  -2   11.01    0.74 
  -2  -3   2   10.80    0.83 
  -2  -3   2   12.65    0.82 
   1   3  -2    0.25    0.27 
   1   3  -2   -0.09    0.14 
   1   3  -2    0.28    0.36 
  -1  -3   2    0.07    0.16 
  -1  -3   2    0.24    0.12 
   0   3  -2    3.43    0.64 
   0   3  -2    2.79    0.56 
   0   3  -2    3.35    0.20 
   0   3  -2    3.21    0.20 
   0  -3   2    2.52    0.54 
   0  -3   2    3.75    0.56 
  -1   3  -2   13.06    1.08 
  -1   3  -2   12.53    0.65 
   1  -3   2   13.40    0.66 
   1  -3   2   12.70    0.90 
  -2   3  -2    4.60    0.66 
  -2   3  -2    4.17    0.92 
   2  -3   2    2.59    0.27 
   2  -3   2    4.94    0.67 
  -3   3  -2    3.93    0.77 
  -3   3  -2    3.84    0.88 
   3  -3   2    4.81    0.65 
  -4   3  -2   26.91    1.74 
  -4   3  -2   23.37    1.01 
  -4   3  -2   26.65    1.92 
   4  -3   2   28.49    1.17 
  -5   3  -2    1.82    0.61 
  -5   3  -2    2.89    0.40 
  -5   3  -2    4.29    1.02 
   5  -3   2    1.89    0.35 
  -6   3  -2   16.09    2.10 
  -6   3  -2   17.06    1.76 
  -7   3  -2    1.59    0.56 
  -7   3  -2    2.32    0.79 
  -8   3  -2    0.23    0.30 
  -8   3  -2   -0.20    0.43 
  -9   3  -2    0.69    0.61 
  -9   3  -2    0.73    0.39 
  -9  -2   2    1.56    0.69 
  -9  -2   2    1.81    0.55 
  -8  -2   2    0.33    0.46 
  -8  -2   2    0.39    0.41 
  -7  -2   2    0.73    0.31 
  -7  -2   2    1.47    0.55 
   6   2  -2    0.17    0.18 
  -6  -2   2    0.41    0.40 
  -6  -2   2    0.77    0.36 
   5   2  -2   12.00    0.89 
  -5  -2   2   12.37    1.17 
  -5  -2   2   11.91    1.61 
   4   2  -2    6.03    0.79 
  -4  -2   2    5.51    0.92 
  -4  -2   2    5.86    1.04 
   3   2  -2   10.33    0.83 
  -3  -2   2    9.04    0.87 
  -3  -2   2    9.39    1.17 
   2   2  -2    3.26    0.58 
   2   2  -2    3.56    0.54 
  -2  -2   2    2.93    0.60 
  -2  -2   2    2.86    0.55 
   1   2  -2   24.94    1.06 
   1   2  -2   23.32    0.96 
   1   2  -2   23.89    0.99 
   1   2  -2   24.24    1.16 
  -1  -2   2   22.83    1.12 
  -1  -2   2   25.22    1.03 
   0   2  -2  112.53    1.93 
   0   2  -2  114.58    2.67 
   0   2  -2  113.63    2.52 
   0  -2   2  113.14    2.67 
   0  -2   2  114.11    2.50 
   0  -2   2  112.49    1.93 
  -1   2  -2    6.23    0.70 
  -1   2  -2    6.15    0.51 
  -1   2  -2    5.68    0.84 
   1  -2   2    5.30    0.47 
   1  -2   2    5.14    0.65 
   1  -2   2    5.39    0.77 
  -2   2  -2    2.56    0.52 
  -2   2  -2    3.08    0.71 
   2  -2   2    3.67    0.53 
   2  -2   2    3.33    0.50 
  -3   2  -2   21.60    1.37 
  -3   2  -2   22.06    0.98 
  -3   2  -2   20.40    1.54 
   3  -2   2   21.01    0.99 
  -4   2  -2   -0.05    0.35 
  -4   2  -2    0.40    0.11 
  -4   2  -2    0.57    0.43 
   4  -2   2    0.41    0.18 
  -5   2  -2   40.04    1.24 
  -5   2  -2   43.48    2.47 
  -5   2  -2   38.92    2.40 
   5  -2   2   41.80    1.33 
  -6   2  -2    0.33    0.20 
  -6   2  -2   -0.42    0.32 
  -7   2  -2   39.28    2.73 
  -7   2  -2   40.03    2.82 
  -8   2  -2    0.61    0.37 
  -8   2  -2    0.57    0.41 
  -9   2  -2    4.77    1.34 
  -9   2  -2    5.11    1.35 
  -9  -1   2    2.41    0.98 
  -9  -1   2    1.82    0.66 
  -8  -1   2    5.45    1.27 
  -8  -1   2    6.96    1.29 
  -7  -1   2   -0.11    0.29 
  -7  -1   2    0.22    0.34 
  -6  -1   2   16.07    1.55 
  -6  -1   2   14.07    1.93 
   5   1  -2   10.08    0.58 
   5   1  -2   10.85    0.71 
  -5  -1   2    9.85    1.46 
  -5  -1   2   10.49    1.43 
   4   1  -2   22.02    0.98 
   4   1  -2   22.94    1.06 
  -4  -1   2   22.61    1.56 
  -4  -1   2   24.75    1.76 
   3   1  -2   20.20    0.94 
   3   1  -2   20.12    0.97 
  -3  -1   2   19.55    1.42 
  -3  -1   2   20.98    1.36 
   2   1  -2    1.01    0.27 
   2   1  -2    0.97    0.31 
  -2  -1   2    0.93    0.43 
  -2  -1   2    1.07    0.32 
  -2  -1   2    0.94    0.43 
   1   1  -2   20.56    0.99 
   1   1  -2   21.41    1.02 
   1   1  -2   21.76    0.96 
  -1  -1   2   20.35    1.04 
  -1  -1   2   20.22    0.94 
  -1  -1   2   21.24    1.04 
   0   1  -2  258.29    4.01 
   0   1  -2  263.54    4.35 
   0  -1   2  271.48    4.41 
   0  -1   2  267.33    4.18 
  -1   1  -2    7.41    0.61 
  -1   1  -2    7.04    0.69 
  -1   1  -2    7.05    0.56 
   1  -1   2    7.29    0.69 
   1  -1   2    6.75    0.57 
  -2   1  -2    1.82    0.45 
  -2   1  -2    1.69    0.57 
   2  -1   2    2.11    0.47 
   2  -1   2    1.80    0.39 
  -3   1  -2   36.64    1.80 
  -3   1  -2   35.91    1.74 
  -3   1  -2   39.02    1.30 
   3  -1   2   36.51    1.29 
  -4   1  -2   28.79    1.79 
  -4   1  -2   28.19    1.78 
  -4   1  -2   31.81    1.14 
   4  -1   2   31.55    1.20 
  -5   1  -2   48.30    1.45 
  -5   1  -2   47.37    2.56 
  -5   1  -2   51.25    2.58 
   5  -1   2   49.77    1.52 
  -6   1  -2    0.14    0.31 
  -6   1  -2    0.47    0.39 
   6  -1   2    0.56    0.11 
  -7   1  -2    6.24    1.24 
  -7   1  -2    7.45    1.49 
  -8   1  -2   27.14    2.27 
  -8   1  -2   24.56    2.31 
  -9   1  -2    1.89    0.73 
  -9   1  -2    1.49    0.62 
 -10   1  -2   15.19    2.51 
 -10   1  -2   14.70    2.17 
  -9   0   2    2.85    1.05 
  -9   0   2    2.40    0.80 
  -8   0   2   17.37    1.77 
  -8   0   2   16.38    2.40 
  -7   0   2    5.01    1.26 
  -7   0   2    4.20    0.98 
  -6   0   2    1.52    0.57 
  -6   0   2    2.74    0.81 
   5   0  -2   -0.05    0.05 
   5   0  -2    0.00    0.05 
  -5   0   2    0.35    0.31 
  -5   0   2    0.11    0.25 
   4   0  -2    3.01    0.29 
   4   0  -2    3.02    0.26 
  -4   0   2    2.65    0.79 
  -4   0   2    2.55    0.74 
   3   0  -2   59.51    1.43 
   3   0  -2   61.11    1.46 
  -3   0   2   59.82    2.48 
  -3   0   2   61.39    2.57 
   2   0  -2   33.56    1.05 
  -2   0   2   33.65    1.66 
  -2   0   2   35.61    1.65 
  -2   0   2   35.57    1.07 
   1   0  -2   24.58    1.18 
   1   0  -2   26.11    1.21 
   1   0  -2   26.53    0.93 
  -1   0   2   25.30    0.90 
  -1   0   2   23.81    1.18 
  -1   0   2   24.05    1.19 
   0   0  -2  182.72    3.23 
   0   0  -2  194.76    3.22 
   0   0  -2  182.22    3.31 
   0   0   2  182.99    3.22 
   0   0   2  179.48    3.30 
   0   0   2  186.22    3.18 
  -1   0  -2   38.38    1.25 
  -1   0  -2   36.98    1.20 
  -1   0  -2   36.68    1.19 
   1   0   2   36.52    1.18 
   1   0   2   37.90    1.19 
   1   0   2   38.45    1.22 
  -2   0  -2   18.60    1.03 
  -2   0  -2   18.36    0.88 
  -2   0  -2   19.10    1.10 
   2   0   2   17.49    0.99 
   2   0   2   18.01    1.01 
   2   0   2   18.88    0.91 
  -3   0  -2  142.75    3.49 
  -3   0  -2  148.78    2.95 
  -3   0  -2  146.69    3.69 
   3   0   2  145.83    2.99 
  -4   0  -2    5.08    0.88 
  -4   0  -2    6.31    1.04 
  -4   0  -2    5.27    0.43 
   4   0   2    6.15    0.59 
  -5   0  -2   26.96    1.11 
  -5   0  -2   33.21    2.10 
  -5   0  -2   31.60    1.92 
   5   0   2   31.55    1.29 
  -6   0  -2   12.27    1.27 
  -6   0  -2   11.85    1.69 
   6   0   2   11.09    0.76 
  -7   0  -2   16.83    1.63 
  -7   0  -2   11.65    1.76 
  -8   0  -2   -0.07    0.28 
  -8   0  -2   -0.08    0.37 
  -9   0  -2    6.66    1.37 
  -9   0  -2    8.01    1.68 
 -10   0  -2   12.27    2.21 
 -10   0  -2   14.88    2.20 
  -9   1   2    0.71    0.48 
  -9   1   2   -0.54    0.40 
  -8   1   2    5.15    1.24 
  -7   1   2    1.50    0.68 
  -7   1   2    0.65    0.46 
  -6   1   2    0.60    0.33 
  -6   1   2    1.39    0.61 
  -5   1   2    2.24    0.77 
  -5   1   2    2.98    0.85 
  -4   1   2   29.54    2.02 
  -4   1   2   26.69    1.88 
   3  -1  -2    9.30    0.35 
   3  -1  -2    9.53    0.35 
  -3   1   2    9.88    1.37 
  -3   1   2    9.56    1.32 
   2  -1  -2    5.91    0.37 
  -2   1   2    5.27    0.37 
  -2   1   2    5.71    0.97 
  -2   1   2    5.68    0.87 
   1  -1  -2   18.18    1.63 
   1  -1  -2   17.52    0.72 
  -1   1   2   17.72    1.09 
  -1   1   2   17.93    0.73 
  -1   1   2   19.02    1.17 
   0  -1  -2  454.62    6.83 
   0  -1  -2  445.40    6.80 
   0  -1  -2  462.04    6.54 
   0   1   2  457.52    6.81 
   0   1   2  462.49    6.83 
   0   1   2  462.07    6.56 
  -1  -1  -2  412.00    6.07 
  -1  -1  -2  423.95    6.32 
  -1  -1  -2  429.23    5.93 
  -1  -1  -2  428.16    6.38 
   1   1   2  420.24    6.31 
   1   1   2  432.33    6.39 
   1   1   2  423.32    5.90 
  -2  -1  -2  844.96   11.82 
  -2  -1  -2  830.03   11.46 
  -2  -1  -2  838.36   11.22 
   2   1   2  837.26   11.48 
   2   1   2  833.28   11.22 
   2   1   2  822.18   11.77 
  -3  -1  -2   12.18    0.75 
  -3  -1  -2   12.28    1.03 
  -3  -1  -2   12.28    0.90 
   3   1   2   11.74    0.84 
   3   1   2   11.93    0.81 
  -4  -1  -2  164.97    3.97 
  -4  -1  -2  164.98    4.45 
   4   1   2  166.01    3.57 
  -5  -1  -2    0.61    0.42 
  -5  -1  -2    0.53    0.46 
   5   1   2    0.57    0.27 
  -6  -1  -2    0.05    0.32 
  -6  -1  -2    0.20    0.29 
   6   1   2   -0.03    0.15 
  -7  -1  -2    7.29    1.26 
  -7  -1  -2    7.56    1.44 
   7   1   2    7.86    0.68 
  -8  -1  -2    0.38    0.30 
  -8  -1  -2   -0.18    0.38 
  -9  -1  -2    1.83    0.68 
  -9  -1  -2    3.89    0.97 
 -10  -1  -2    0.60    0.39 
 -10  -1  -2    0.27    0.35 
  -8   2   2    0.40    0.30 
  -8   2   2    1.64    0.62 
  -7   2   2    0.76    0.31 
  -7   2   2    1.83    0.54 
  -6   2   2    4.49    1.12 
  -6   2   2    4.93    1.19 
  -5   2   2    0.53    0.34 
  -5   2   2    0.70    0.46 
  -4   2   2   11.41    1.54 
  -4   2   2   14.63    1.47 
  -3   2   2    2.35    0.74 
  -3   2   2    2.72    0.75 
   2  -2  -2    0.65    0.19 
  -2   2   2    0.62    0.19 
  -2   2   2    0.16    0.41 
  -2   2   2    0.52    0.43 
   1  -2  -2    9.89    0.62 
  -1   2   2   10.04    0.92 
  -1   2   2   10.77    0.99 
  -1   2   2    9.97    0.62 
   0  -2  -2  163.08    3.13 
   0  -2  -2  161.89    3.35 
   0  -2  -2  162.56    3.33 
   0   2   2  160.68    3.28 
   0   2   2  155.17    3.10 
   0   2   2  161.19    3.36 
  -1  -2  -2    0.06    0.08 
  -1  -2  -2    0.47    0.26 
  -1  -2  -2    0.18    0.30 
   1   2   2   -0.01    0.24 
   1   2   2    0.10    0.24 
   1   2   2    0.26    0.32 
  -2  -2  -2  123.54    2.97 
  -2  -2  -2  122.49    2.29 
   2   2   2  125.87    2.97 
   2   2   2  125.66    2.97 
  -3  -2  -2   11.68    0.76 
  -3  -2  -2   11.93    1.06 
   3   2   2   12.22    0.75 
   3   2   2   12.49    0.96 
  -4  -2  -2   36.28    1.54 
  -4  -2  -2   33.16    1.86 
   4   2   2   34.20    1.59 
  -5  -2  -2    0.24    0.29 
  -5  -2  -2   -0.16    0.31 
   5   2   2    0.27    0.29 
  -6  -2  -2   15.25    1.28 
  -6  -2  -2   16.00    1.54 
   6   2   2   15.66    1.13 
  -7  -2  -2    3.91    0.78 
  -7  -2  -2    4.32    1.00 
   7   2   2    3.26    0.65 
  -8  -2  -2    0.85    0.33 
  -8  -2  -2   -0.36    0.24 
  -9  -2  -2   -0.05    0.37 
  -9  -2  -2    0.81    0.32 
 -10  -2  -2    1.00    0.35 
 -10  -2  -2    0.02    0.53 
  -8   3   2   -0.39    0.50 
  -8   3   2    0.34    0.41 
  -7   3   2   21.40    2.19 
  -7   3   2   17.27    2.45 
  -6   3   2    5.52    1.35 
  -6   3   2    3.52    1.00 
  -5   3   2   18.92    1.81 
  -5   3   2   17.79    1.78 
  -4   3   2    0.48    0.44 
  -4   3   2   -0.19    0.29 
   3  -3  -2    4.83    0.31 
  -3   3   2    5.52    1.04 
  -3   3   2    4.84    0.34 
  -3   3   2    5.55    1.11 
   2  -3  -2   20.57    0.87 
  -2   3   2   17.39    1.47 
  -2   3   2   20.80    1.50 
  -2   3   2   19.54    0.87 
   1  -3  -2    1.75    0.48 
   1  -3  -2    2.11    0.38 
  -1   3   2    1.90    0.56 
  -1   3   2    1.13    0.36 
  -1   3   2    1.39    0.54 
   0  -3  -2   93.92    2.48 
   0  -3  -2   91.42    2.88 
   0   3   2   95.16    2.62 
   0   3   2   91.66    2.59 
   0   3   2   91.76    2.43 
  -1  -3  -2   34.57    1.21 
  -1  -3  -2   35.54    1.40 
   1   3   2   35.10    1.37 
   1   3   2   33.27    1.47 
   1   3   2   34.96    1.25 
  -2  -3  -2    9.09    0.50 
  -2  -3  -2    9.93    0.84 
   2   3   2    8.61    0.85 
  -3  -3  -2    5.31    0.80 
  -3  -3  -2    6.79    0.48 
   3   3   2    6.51    0.45 
   3   3   2    6.10    0.86 
  -4  -3  -2  102.69    2.44 
  -4  -3  -2  100.76    3.32 
   4   3   2  105.44    2.43 
   4   3   2  104.24    3.13 
  -5  -3  -2    5.10    0.76 
  -5  -3  -2    4.73    0.94 
   5   3   2    5.03    0.86 
  -6  -3  -2    1.54    0.45 
  -6  -3  -2    2.16    0.55 
   6   3   2    2.10    0.59 
  -7  -3  -2   -0.14    0.22 
  -7  -3  -2   -0.10    0.20 
   7   3   2   -0.30    0.17 
  -8  -3  -2    0.35    0.23 
  -8  -3  -2    0.12    0.21 
  -9  -3  -2   20.07    2.73 
  -9  -3  -2   17.66    1.54 
 -10  -3  -2    4.07    1.21 
  -8   4   2   -0.76    0.33 
  -8   4   2    0.41    0.44 
  -7   4   2    5.65    1.40 
  -7   4   2    4.19    1.09 
  -6   4   2    0.35    0.35 
  -6   4   2   -0.56    0.30 
  -5   4   2    5.67    1.31 
  -5   4   2    5.52    1.29 
  -4   4   2    0.35    0.31 
  -4   4   2    0.20    0.34 
   3  -4  -2    7.57    0.47 
  -3   4   2    9.66    1.40 
  -3   4   2    7.91    0.54 
  -3   4   2    8.36    1.35 
   2  -4  -2   17.37    1.10 
  -2   4   2   21.15    1.06 
  -2   4   2   22.54    1.68 
  -2   4   2   20.16    1.51 
   1  -4  -2    8.29    1.02 
  -1   4   2    6.24    0.99 
  -1   4   2    7.67    0.74 
   0  -4  -2   12.07    0.89 
   0   4   2   13.25    1.01 
   0   4   2   11.51    1.00 
  -1  -4  -2   24.23    1.08 
  -1  -4  -2   24.51    1.22 
   1   4   2   23.40    1.13 
   1   4   2   23.03    1.40 
  -2  -4  -2   13.20    0.61 
  -2  -4  -2   14.46    1.00 
   2   4   2   14.23    0.64 
   2   4   2   14.47    1.17 
  -3  -4  -2    0.69    0.14 
  -3  -4  -2    0.88    0.44 
   3   4   2    0.82    0.53 
  -4  -4  -2    7.53    1.07 
  -4  -4  -2    8.60    0.50 
   4   4   2    8.68    0.47 
   4   4   2   10.30    1.26 
  -5  -4  -2    0.01    0.30 
  -5  -4  -2    0.05    0.15 
   5   4   2   -0.14    0.08 
   5   4   2   -0.24    0.19 
  -6  -4  -2    1.10    0.28 
  -6  -4  -2    0.87    0.44 
   6   4   2    1.49    0.51 
  -7  -4  -2    4.90    1.13 
  -7  -4  -2    4.45    0.78 
   7   4   2    3.35    0.79 
  -8  -4  -2   10.36    1.68 
  -8  -4  -2   11.56    1.06 
   8   4   2   10.65    1.41 
  -9  -4  -2    4.19    1.10 
 -10  -4  -2    3.21    1.11 
  -7   5   2    1.29    0.40 
  -7   5   2   -0.15    0.58 
  -6   5   2    0.47    0.37 
  -6   5   2    0.31    0.35 
  -5   5   2   44.53    2.99 
  -5   5   2   49.45    3.26 
  -4   5   2   39.40    2.60 
  -4   5   2   39.29    2.71 
  -3   5   2    1.38    0.33 
  -3   5   2    0.49    0.36 
  -3   5   2    0.38    0.45 
   2  -5  -2   30.30    1.78 
  -2   5   2   28.99    1.85 
  -2   5   2   27.62    1.98 
  -2   5   2   28.38    1.39 
   1  -5  -2   -0.05    0.21 
  -1   5   2    0.00    0.18 
  -1   5   2   -0.41    0.33 
   0  -5  -2  175.26    3.98 
   0   5   2  171.45    4.28 
   0   5   2  174.90    4.31 
  -1  -5  -2    4.20    0.64 
   1   5   2    4.87    0.72 
   1   5   2    3.92    0.78 
  -2  -5  -2  153.82    2.87 
  -2  -5  -2  155.65    3.62 
   2   5   2  156.49    4.30 
   2   5   2  153.81    2.92 
  -3  -5  -2   47.18    2.05 
   3   5   2   49.68    2.37 
  -4  -5  -2    0.09    0.30 
   4   5   2   -0.06    0.32 
  -5  -5  -2    1.09    0.21 
  -5  -5  -2    2.06    0.64 
   5   5   2    1.80    0.54 
   5   5   2    1.23    0.20 
  -6  -5  -2    0.91    0.25 
  -6  -5  -2    2.30    0.73 
   6   5   2    0.71    0.41 
  -7  -5  -2   12.22    1.24 
  -7  -5  -2   13.66    1.88 
   7   5   2   13.40    1.66 
  -8  -5  -2   19.13    1.91 
   8   5   2   19.84    1.65 
  -9  -5  -2    1.89    0.83 
 -10  -5  -2   -0.59    0.38 
  -7   6   2    0.83    0.36 
  -7   6   2    1.83    0.55 
  -6   6   2    1.44    0.45 
  -6   6   2   -0.62    0.34 
  -5   6   2    0.26    0.34 
  -5   6   2    0.04    0.36 
  -4   6   2   -0.08    0.34 
  -4   6   2    0.69    0.45 
   3  -6  -2   16.35    1.43 
  -3   6   2   14.27    1.45 
  -3   6   2   15.54    2.12 
  -3   6   2   15.43    0.99 
   2  -6  -2   10.39    1.03 
  -2   6   2    9.64    1.31 
  -2   6   2    8.26    1.01 
  -2   6   2    8.42    1.38 
   1  -6  -2    7.59    1.02 
  -1   6   2    7.54    1.23 
  -1   6   2    7.01    0.94 
   0  -6  -2    4.95    0.77 
   0   6   2    5.58    0.92 
   0   6   2    5.47    0.94 
  -1  -6  -2    0.28    0.25 
   1   6   2    0.83    0.42 
   1   6   2    0.29    0.26 
  -2  -6  -2    7.97    0.77 
  -2  -6  -2    8.10    0.53 
   2   6   2    8.53    0.63 
   2   6   2    8.33    1.19 
  -3  -6  -2    1.65    0.48 
   3   6   2    0.89    0.46 
  -4  -6  -2    2.58    0.63 
   4   6   2    3.04    0.82 
  -5  -6  -2    2.51    0.66 
   5   6   2    3.08    0.85 
  -6  -6  -2    0.33    0.25 
   6   6   2    0.14    0.30 
  -7  -6  -2    4.96    1.06 
   7   6   2    4.66    1.01 
  -8  -6  -2   -0.11    0.21 
   8   6   2    0.42    0.29 
  -9  -6  -2    0.67    0.35 
 -10  -6  -2    0.15    0.42 
  -6   7   2    0.68    0.40 
  -6   7   2    0.69    0.45 
  -5   7   2   -0.43    0.31 
  -5   7   2   -0.04    0.31 
   4  -7  -2    6.90    1.25 
  -4   7   2    4.46    1.14 
  -4   7   2    5.13    1.17 
   3  -7  -2    0.05    0.24 
  -3   7   2    0.24    0.23 
  -3   7   2    0.15    0.24 
   2  -7  -2   -0.03    0.21 
  -2   7   2    0.08    0.32 
  -2   7   2    0.52    0.26 
   1  -7  -2    4.64    0.83 
  -1   7   2    5.67    1.12 
  -1   7   2    5.26    0.92 
   0  -7  -2    3.04    0.63 
   0   7   2    3.15    0.76 
   0   7   2    2.66    0.70 
  -1  -7  -2   42.28    1.82 
   1   7   2   43.41    2.00 
   1   7   2   42.35    2.31 
  -2  -7  -2   33.10    1.57 
   2   7   2   35.55    2.18 
   2   7   2   32.75    1.40 
  -3  -7  -2    5.60    0.26 
  -3  -7  -2    6.35    0.91 
   3   7   2    7.74    1.22 
   3   7   2    5.87    0.31 
  -4  -7  -2    0.67    0.33 
   4   7   2    0.53    0.41 
  -5  -7  -2   24.16    1.70 
   5   7   2   24.47    1.98 
  -6  -7  -2    2.86    0.74 
   6   7   2    2.48    0.84 
  -7  -7  -2   28.80    2.16 
   7   7   2   29.58    2.26 
  -8  -7  -2   -0.24    0.24 
   8   7   2    0.05    0.25 
  -9  -7  -2    5.40    1.32 
   9   7   2    4.03    0.84 
 -10  -7  -2    1.93    0.67 
   5  -8  -2    0.65    0.28 
  -5   8   2   -0.07    0.35 
   4  -8  -2    1.40    0.35 
  -4   8   2    0.92    0.27 
  -4   8   2    0.83    0.39 
   3  -8  -2    2.96    0.76 
  -3   8   2    2.42    0.75 
   2  -8  -2    6.87    1.13 
  -2   8   2    7.43    1.11 
  -2   8   2    6.49    1.30 
   1  -8  -2    6.61    1.03 
  -1   8   2    4.15    1.02 
  -1   8   2    4.78    0.87 
   0  -8  -2    0.97    0.38 
   0   8   2    0.51    0.36 
   0   8   2    0.87    0.38 
  -1  -8  -2    6.11    0.86 
   1   8   2    4.95    0.97 
   1   8   2    6.43    1.01 
  -2  -8  -2   27.58    1.46 
   2   8   2   28.79    2.05 
   2   8   2   26.42    1.36 
  -3  -8  -2   35.17    1.78 
   3   8   2   35.99    2.36 
  -4  -8  -2    0.76    0.30 
   4   8   2    0.16    0.29 
  -5  -8  -2    3.42    0.77 
   5   8   2    1.59    0.64 
  -6  -8  -2    1.53    0.54 
   6   8   2    0.50    0.43 
  -7  -8  -2   15.59    1.54 
   7   8   2   14.28    2.01 
  -8  -8  -2    2.41    0.67 
   8   8   2    1.31    0.53 
  -9  -8  -2   15.71    2.33 
   9   8   2   16.65    2.18 
  -4   9   2    3.01    0.69 
  -3   9   2    4.74    1.22 
  -2   9   2   10.47    1.71 
  -2   9   2    7.91    1.09 
  -1   9   2   13.93    1.90 
  -1   9   2   16.31    1.46 
   0   9   2    5.41    1.03 
   0   9   2    3.98    0.93 
   1   9   2    0.38    0.28 
   1   9   2    0.73    0.39 
  -2  -9  -2    5.17    0.82 
   2   9   2    4.85    1.12 
  -3  -9  -2   20.38    1.24 
   3   9   2   23.10    1.98 
   4   9   2    0.95    0.46 
  -5  -9  -2    0.61    0.30 
   5   9   2    0.39    0.38 
  -6  -9  -2    0.31    0.24 
   6   9   2   -0.70    0.24 
  -7  -9  -2    1.15    0.36 
   7   9   2    0.61    0.38 
  -8  -9  -2    0.78    0.29 
   8   9   2    0.01    0.24 
   9   9   2    0.72    0.47 
  -3  10   2    0.52    0.45 
  -2  10   2    1.84    0.49 
  -1  10   2    9.18    1.39 
  -1  10   2   10.54    1.64 
   0  10   2    2.48    0.57 
   0  10   2    1.86    0.56 
   1  10   2    5.79    1.16 
   2  10   2    1.25    0.54 
   3  10   2   10.21    1.69 
   4  10   2   -0.86    0.23 
   5  10   2    5.02    1.22 
   6  10   2   -0.44    0.31 
   7  10   2    2.76    0.82 
   8  10   2    2.27    0.64 
  -2  11   2   -0.02    0.37 
  -1  11   2    3.78    0.43 
   0  11   2    5.14    1.12 
   1  11   2    0.53    0.35 
   2  11   2   -0.05    0.26 
   3  11   2   14.23    2.19 
   4  11   2    5.51    1.38 
   5  11   2    5.17    1.29 
   6  11   2   13.78    2.21 
   7  11   2    0.55    0.40 
   0  12   2    0.65    0.33 
   1  12   2    0.14    0.30 
   2  12   2    3.64    0.90 
   3  12   2   -0.24    0.35 
   4  12   2   11.89    1.95 
   5  12   2    7.47    1.64 
   6  12   2    4.93    1.11 
   2  13   2    2.09    0.50 
   3  13   2    0.94    0.42 
   4  13   2    1.27    0.40 
   5  12  -3    0.83    0.63 
   4  12  -3   -0.74    0.28 
   3  12  -3    1.79    0.82 
   2  12  -3    1.53    0.60 
   1  12  -3    2.00    0.51 
   0  12  -3    1.74    0.65 
  -1  12  -3    0.64    0.39 
   6  11  -3    0.67    0.31 
   5  11  -3    2.23    0.73 
   4  11  -3    0.33    0.37 
   3  11  -3    1.21    0.47 
   2  11  -3    4.07    1.10 
   1  11  -3   30.55    2.52 
   0  11  -3    3.38    0.93 
  -1  11  -3    4.52    0.96 
  -2  11  -3   -0.10    0.31 
  -2  11  -3    0.75    0.36 
  -3  11  -3   -0.04    0.37 
   7  10  -3    0.21    0.31 
   6  10  -3    0.20    0.27 
   5  10  -3    5.20    1.12 
   4  10  -3    1.76    0.72 
   3  10  -3   22.73    2.13 
   2  10  -3    3.68    0.96 
   1  10  -3    0.25    0.21 
   0  10  -3    5.04    1.04 
   0  10  -3    4.82    1.13 
  -1  10  -3    0.12    0.30 
  -1  10  -3    1.04    0.32 
  -2  10  -3   19.46    1.70 
  -2  10  -3   18.00    1.80 
  -3  10  -3    6.80    1.38 
  -3  10  -3   11.45    1.79 
  -4  10  -3    1.26    0.50 
   8   9  -3   -0.27    0.33 
   7   9  -3   -0.07    0.30 
   6   9  -3    1.07    0.44 
   5   9  -3    0.65    0.34 
   4   9  -3   17.32    2.26 
   3   9  -3    8.71    1.57 
   2   9  -3    4.60    1.03 
   1   9  -3   11.78    1.10 
   1   9  -3   13.73    1.84 
   0   9  -3   19.20    1.73 
   0   9  -3   19.30    1.58 
  -1   9  -3    0.21    0.25 
  -1   9  -3    0.18    0.28 
  -2   9  -3    2.92    0.64 
  -2   9  -3    1.65    0.56 
  -3   9  -3    0.31    0.25 
  -3   9  -3    0.36    0.44 
  -4   9  -3    1.31    0.46 
  -5   9  -3    8.37    1.74 
   8   8  -3    0.12    0.29 
   7   8  -3    1.00    0.38 
  -7  -8   3    0.65    0.33 
   6   8  -3    0.36    0.36 
  -6  -8   3    0.61    0.24 
   5   8  -3    1.74    0.63 
   4   8  -3    0.55    0.27 
   3   8  -3   11.02    1.64 
   2   8  -3    0.14    0.21 
   2   8  -3    0.49    0.40 
   1   8  -3    4.13    0.93 
   1   8  -3    4.72    0.86 
   0   8  -3    2.25    0.67 
   0   8  -3    3.59    0.79 
  -1   8  -3   49.77    2.73 
  -1   8  -3   50.12    2.71 
  -2   8  -3    4.67    1.06 
  -2   8  -3    7.67    1.16 
  -3   8  -3   47.42    2.99 
  -3   8  -3   47.83    2.54 
  -4   8  -3    1.71    0.61 
  -5   8  -3    7.81    1.61 
  -6   8  -3    2.13    0.79 
  -8  -7   3    4.50    0.94 
   7   7  -3    1.69    0.51 
  -7  -7   3    0.81    0.39 
   6   7  -3    3.46    0.88 
  -6  -7   3    3.66    0.89 
   5   7  -3    6.83    1.28 
  -5  -7   3    5.00    0.94 
   4   7  -3   32.35    2.26 
  -4  -7   3   32.69    1.76 
   3   7  -3    6.03    1.14 
   3   7  -3    5.64    0.75 
  -3  -7   3    6.63    0.60 
   2   7  -3    4.39    0.27 
   2   7  -3    4.85    0.77 
   2   7  -3    4.80    0.99 
   1   7  -3    0.87    0.36 
   1   7  -3    0.96    0.45 
   0   7  -3    4.84    0.92 
   0   7  -3    4.35    0.86 
  -1   7  -3    0.58    0.41 
  -1   7  -3    0.12    0.20 
  -2   7  -3    2.11    0.71 
  -2   7  -3    1.77    0.48 
  -2   7  -3    1.63    0.30 
  -3   7  -3   -0.49    0.21 
  -3   7  -3    0.18    0.13 
  -3   7  -3   -0.07    0.17 
  -4   7  -3    0.25    0.39 
  -4   7  -3   -0.06    0.18 
  -4   7  -3    0.14    0.31 
  -5   7  -3    8.70    1.74 
  -6   7  -3    0.89    0.46 
  -7   7  -3    2.22    0.59 
  -9  -6   3    0.94    0.40 
  -8  -6   3    6.69    1.30 
   7   6  -3    8.37    1.34 
  -7  -6   3    7.25    1.35 
   6   6  -3    0.13    0.25 
  -6  -6   3    0.47    0.24 
   5   6  -3    5.65    0.75 
   5   6  -3    5.24    1.09 
  -5  -6   3    6.47    1.13 
   4   6  -3   28.47    1.37 
   4   6  -3   25.96    1.91 
  -4  -6   3   26.77    1.63 
   3   6  -3    0.61    0.26 
   3   6  -3   -0.15    0.24 
  -3  -6   3   -0.05    0.11 
   2   6  -3   -0.07    0.16 
   2   6  -3    0.16    0.33 
   2   6  -3    0.03    0.07 
  -2  -6   3   -0.11    0.09 
   1   6  -3    1.77    0.63 
   1   6  -3    1.98    0.55 
   0   6  -3    7.72    1.17 
   0   6  -3    5.12    0.92 
  -1   6  -3    2.39    0.62 
  -1   6  -3    1.76    0.60 
  -1   6  -3    1.65    0.21 
   1  -6   3    1.45    0.14 
  -2   6  -3   13.10    1.17 
  -2   6  -3   13.48    1.70 
  -2   6  -3   11.91    0.81 
  -3   6  -3   11.13    1.65 
  -3   6  -3   11.55    1.04 
  -3   6  -3   10.67    0.95 
  -4   6  -3    3.10    0.67 
  -4   6  -3    2.52    0.57 
  -4   6  -3    2.83    0.92 
  -5   6  -3    0.01    0.34 
  -5   6  -3    0.09    0.26 
  -6   6  -3    3.60    1.02 
  -6   6  -3    2.21    0.67 
  -7   6  -3    8.28    1.46 
  -7   6  -3    9.57    1.76 
  -8   6  -3    5.93    1.53 
  -9  -5   3   -0.92    0.37 
  -8  -5   3    0.77    0.40 
   7   5  -3    0.12    0.24 
  -7  -5   3    0.05    0.28 
   6   5  -3   10.96    1.44 
  -6  -5   3   12.63    1.76 
  -6  -5   3   12.44    1.12 
   5   5  -3   11.43    1.48 
  -5  -5   3    9.76    0.91 
  -5  -5   3   10.80    1.46 
   4   5  -3    0.34    0.23 
   4   5  -3    1.45    0.48 
  -4  -5   3    0.77    0.32 
  -4  -5   3    0.83    0.36 
   3   5  -3   18.21    1.47 
  -3  -5   3   16.98    1.18 
   2   5  -3    0.59    0.13 
   2   5  -3    0.93    0.48 
   2   5  -3    0.75    0.35 
  -2  -5   3    0.68    0.25 
   1   5  -3   13.22    1.00 
   1   5  -3   12.75    0.52 
   1   5  -3   12.78    0.51 
   1   5  -3   13.05    1.22 
   0   5  -3   10.04    1.23 
   0   5  -3    9.44    1.18 
  -1   5  -3    2.11    0.67 
  -1   5  -3    1.50    0.25 
  -1   5  -3    1.67    0.51 
   1  -5   3    1.87    0.24 
   1  -5   3    1.71    0.57 
  -2   5  -3    1.97    0.41 
  -2   5  -3    2.25    0.58 
  -2   5  -3    1.69    0.66 
   2  -5   3    1.99    0.57 
  -3   5  -3   10.07    0.94 
  -3   5  -3    9.28    0.89 
  -3   5  -3    8.50    1.35 
  -4   5  -3    1.53    0.67 
  -4   5  -3    2.91    0.57 
  -4   5  -3    2.43    0.63 
  -5   5  -3    0.05    0.12 
  -5   5  -3    0.00    0.22 
  -5   5  -3   -0.15    0.35 
  -6   5  -3    0.57    0.28 
  -6   5  -3   -0.02    0.41 
  -7   5  -3    1.34    0.73 
  -7   5  -3    0.19    0.40 
  -8   5  -3    0.57    0.37 
  -8   5  -3   -1.03    0.47 
  -9  -4   3    0.80    0.63 
  -8  -4   3    0.46    0.52 
  -7  -4   3   38.77    2.74 
  -7  -4   3   40.34    2.42 
   6   4  -3   89.95    3.31 
  -6  -4   3   82.42    3.88 
  -6  -4   3   90.43    3.50 
   5   4  -3    0.94    0.32 
  -5  -4   3    0.85    0.37 
  -5  -4   3    0.82    0.35 
   4   4  -3   22.57    1.54 
  -4  -4   3   25.01    1.70 
  -4  -4   3   20.97    1.35 
   3   4  -3    6.30    0.75 
   3   4  -3    7.35    1.09 
  -3  -4   3    6.93    0.92 
  -3  -4   3    6.12    0.89 
   2   4  -3   74.98    2.78 
  -2  -4   3   76.04    2.28 
   1   4  -3  181.36    4.45 
   1   4  -3  180.69    3.89 
   1   4  -3  178.40    3.15 
   1   4  -3  183.49    3.21 
  -1  -4   3  178.74    4.47 
   0   4  -3   39.02    0.90 
   0   4  -3   37.70    1.84 
   0   4  -3   42.55    0.91 
   0   4  -3   37.47    1.73 
   0  -4   3   37.69    1.88 
  -1   4  -3   39.76    1.93 
  -1   4  -3   41.25    1.19 
   1  -4   3   41.69    1.17 
   1  -4   3   39.23    1.83 
  -2   4  -3    0.41    0.54 
  -2   4  -3    0.33    0.24 
   2  -4   3    0.32    0.32 
  -3   4  -3    4.73    0.83 
  -3   4  -3    3.91    0.94 
   3  -4   3    4.07    0.70 
  -4   4  -3    1.34    0.56 
  -4   4  -3    1.54    0.68 
   4  -4   3    1.30    0.41 
  -5   4  -3    3.93    1.00 
  -5   4  -3    3.64    0.55 
  -5   4  -3    2.70    0.74 
   5  -4   3    3.03    0.56 
  -6   4  -3    1.16    0.55 
  -6   4  -3    1.48    0.52 
  -7   4  -3    3.64    0.96 
  -7   4  -3    4.95    1.19 
  -8   4  -3    3.83    1.12 
  -8   4  -3    3.84    0.94 
  -9   4  -3    0.86    0.48 
  -9   4  -3    0.83    0.38 
  -9  -3   3    0.86    0.54 
  -8  -3   3    2.56    0.61 
  -8  -3   3   -0.08    0.30 
  -7  -3   3    1.24    0.42 
  -7  -3   3    1.61    0.57 
   6   3  -3    2.80    0.62 
  -6  -3   3    3.34    0.75 
  -6  -3   3    1.86    0.64 
   5   3  -3    6.03    0.91 
  -5  -3   3    6.07    1.10 
  -5  -3   3    7.62    1.14 
   4   3  -3   13.62    1.11 
  -4  -3   3   12.69    1.24 
  -4  -3   3   14.45    1.19 
   3   3  -3    3.36    0.68 
  -3  -3   3    3.99    0.79 
  -3  -3   3    3.54    0.70 
   2   3  -3   25.41    1.44 
   2   3  -3   22.42    1.15 
  -2  -3   3   24.50    1.33 
  -2  -3   3   22.81    1.28 
  -2  -3   3   22.74    1.39 
   1   3  -3    1.76    0.37 
   1   3  -3    1.98    0.49 
   1   3  -3    1.86    0.37 
  -1  -3   3    1.91    0.55 
  -1  -3   3    1.92    0.41 
   0   3  -3   17.72    0.74 
   0   3  -3   17.70    1.13 
   0   3  -3   17.47    0.74 
   0  -3   3   17.77    1.19 
   0  -3   3   18.02    0.71 
  -1   3  -3   11.47    1.06 
  -1   3  -3   11.75    0.69 
   1  -3   3   11.20    0.64 
   1  -3   3   12.46    1.03 
  -2   3  -3   28.46    1.31 
  -2   3  -3   30.26    1.77 
   2  -3   3   28.25    1.20 
   2  -3   3   28.16    1.45 
  -3   3  -3   12.98    1.33 
  -3   3  -3   16.72    1.21 
   3  -3   3   17.74    1.14 
  -4   3  -3    3.24    0.79 
  -4   3  -3    3.66    0.92 
   4  -3   3    2.84    0.53 
  -5   3  -3    3.75    0.94 
  -5   3  -3    4.22    0.99 
   5  -3   3    3.19    0.56 
  -6   3  -3    0.61    0.44 
  -6   3  -3    0.41    0.38 
  -7   3  -3    1.20    0.51 
  -7   3  -3    0.41    0.47 
  -8   3  -3    1.09    0.48 
  -8   3  -3    2.23    0.90 
  -9   3  -3    0.68    0.36 
  -9   3  -3    0.82    0.55 
  -9  -2   3    8.50    1.96 
  -9  -2   3    9.99    1.70 
  -8  -2   3    2.08    0.78 
  -8  -2   3    1.88    0.59 
  -7  -2   3    8.66    1.51 
  -7  -2   3    6.30    1.36 
   6   2  -3    0.63    0.16 
  -6  -2   3    0.33    0.34 
  -6  -2   3    0.73    0.29 
   5   2  -3    6.28    0.83 
  -5  -2   3    5.17    0.98 
  -5  -2   3    7.83    1.34 
   4   2  -3    0.47    0.30 
  -4  -2   3    0.40    0.31 
  -4  -2   3    0.24    0.34 
   3   2  -3   14.08    1.01 
  -3  -2   3   12.97    1.21 
  -3  -2   3   13.94    1.16 
  -2  -2   3    4.15    0.73 
  -2  -2   3    4.42    0.74 
  -2  -2   3    3.90    0.66 
   1   2  -3  201.59    3.86 
   1   2  -3  208.36    4.04 
   1   2  -3  206.22    3.92 
  -1  -2   3  204.84    4.01 
  -1  -2   3  203.17    4.26 
   0   2  -3   36.06    1.47 
   0   2  -3   35.50    1.18 
   0  -2   3   34.20    1.51 
   0  -2   3   35.94    1.17 
   0  -2   3   35.42    1.58 
  -1   2  -3    9.52    0.96 
  -1   2  -3    9.90    0.67 
   1  -2   3   10.54    0.66 
   1  -2   3    9.95    0.83 
  -2   2  -3    0.25    0.32 
  -2   2  -3    0.00    0.40 
   2  -2   3    0.32    0.31 
   2  -2   3    0.03    0.05 
  -3   2  -3    0.80    0.43 
  -3   2  -3    1.10    0.60 
   3  -2   3    1.14    0.39 
  -4   2  -3   -0.10    0.40 
  -4   2  -3   -0.19    0.27 
   4  -2   3    0.21    0.19 
  -5   2  -3    8.37    1.34 
  -5   2  -3    5.31    1.11 
   5  -2   3    6.10    0.73 
  -6   2  -3    7.47    1.34 
  -6   2  -3    7.43    1.36 
   6  -2   3    6.59    0.57 
  -7   2  -3    0.10    0.31 
  -7   2  -3    0.58    0.31 
  -8   2  -3    9.66    1.83 
  -8   2  -3    7.45    1.55 
  -9   2  -3    4.28    1.11 
  -9   2  -3    2.32    0.61 
  -9  -1   3   -1.13    0.39 
  -9  -1   3    0.61    0.52 
  -8  -1   3    4.84    1.22 
  -8  -1   3    3.39    0.94 
  -7  -1   3    1.09    0.37 
  -7  -1   3    0.64    0.40 
  -6  -1   3    1.85    0.61 
  -6  -1   3    1.52    0.60 
   5   1  -3    4.38    0.60 
  -5  -1   3    5.38    1.05 
  -5  -1   3    2.96    0.78 
   4   1  -3   40.19    1.52 
  -4  -1   3   42.37    2.24 
  -4  -1   3   38.62    2.31 
   3   1  -3    3.10    0.51 
  -3  -1   3    2.60    0.47 
  -3  -1   3    3.48    0.73 
  -3  -1   3    3.44    0.81 
   2   1  -3    1.89    0.35 
  -2  -1   3    1.80    0.56 
  -2  -1   3    2.08    0.45 
  -2  -1   3    1.89    0.59 
   1   1  -3   13.44    0.91 
   1   1  -3   11.81    0.98 
   1   1  -3   14.38    0.84 
  -1  -1   3   14.40    0.92 
  -1  -1   3   13.73    0.96 
  -1  -1   3   14.55    1.06 
   0   1  -3   21.39    1.07 
   0   1  -3   23.13    1.14 
   0   1  -3   20.75    1.01 
   0   1  -3   21.50    1.00 
   0  -1   3   21.32    1.01 
   0  -1   3   22.11    1.10 
   0  -1   3   21.75    0.99 
  -1   1  -3  226.12    4.29 
  -1   1  -3  219.35    3.94 
  -1   1  -3  210.82    4.14 
   1  -1   3  219.94    4.63 
   1  -1   3  221.17    4.18 
   1  -1   3  229.89    3.99 
  -2   1  -3   28.38    1.25 
  -2   1  -3   29.24    1.52 
  -2   1  -3   28.23    1.38 
   2  -1   3   31.91    1.58 
   2  -1   3   29.11    1.32 
  -3   1  -3   40.12    1.93 
  -3   1  -3   40.68    1.84 
   3  -1   3   43.59    1.62 
  -4   1  -3   12.37    1.23 
  -4   1  -3   10.92    1.38 
   4  -1   3   12.59    0.88 
  -5   1  -3   20.16    1.64 
  -5   1  -3   23.21    1.79 
   5  -1   3   21.87    1.15 
  -6   1  -3    9.52    1.52 
  -6   1  -3    9.92    1.50 
   6  -1   3    8.98    0.70 
  -7   1  -3    0.77    0.29 
  -7   1  -3    0.87    0.46 
  -8   1  -3   32.99    2.64 
  -8   1  -3   36.41    2.62 
  -9   1  -3   -0.38    0.34 
  -9   1  -3    0.36    0.44 
 -10   1  -3    1.68    0.54 
 -10   1  -3    0.68    0.45 
  -9   0   3    4.62    0.80 
  -9   0   3    1.13    0.70 
  -8   0   3   -0.01    0.43 
  -8   0   3   -0.02    0.37 
  -7   0   3    0.80    0.56 
  -7   0   3    0.26    0.54 
  -6   0   3   -0.15    0.27 
  -6   0   3    0.17    0.26 
   5   0  -3    4.79    0.33 
  -5   0   3    5.40    1.08 
  -5   0   3    5.99    1.16 
   4   0  -3    3.62    0.32 
   4   0  -3    3.63    0.45 
  -4   0   3    3.30    0.85 
  -4   0   3    4.54    0.94 
   3   0  -3    7.57    0.52 
  -3   0   3    6.57    1.08 
  -3   0   3    6.58    1.10 
  -3   0   3    8.35    0.58 
   2   0  -3    2.17    0.38 
  -2   0   3    1.91    0.37 
  -2   0   3    2.51    0.65 
  -2   0   3    2.18    0.61 
   1   0  -3    1.73    0.53 
   1   0  -3    1.51    0.35 
  -1   0   3    2.42    0.61 
  -1   0   3    1.73    0.40 
  -1   0   3    1.58    0.53 
   0   0  -3    4.65    0.58 
   0   0  -3    5.19    0.66 
   0   0  -3    5.55    0.70 
   0   0   3    4.36    0.58 
   0   0   3    4.89    0.63 
   0   0   3    5.23    0.74 
  -1   0  -3   13.88    0.91 
  -1   0  -3   14.94    0.88 
  -1   0  -3   14.05    0.89 
   1   0   3   14.63    0.81 
   1   0   3   14.76    0.88 
   1   0   3   14.90    0.92 
  -2   0  -3  111.83    2.69 
  -2   0  -3  113.82    2.90 
  -2   0  -3  113.93    2.83 
   2   0   3  113.57    2.72 
  -3   0  -3   -0.17    0.31 
  -3   0  -3    0.19    0.42 
   3   0   3    0.40    0.29 
  -4   0  -3   22.52    1.52 
  -4   0  -3   23.97    1.62 
   4   0   3   23.87    1.24 
  -5   0  -3   25.82    1.87 
  -5   0  -3   27.03    1.80 
   5   0   3   28.65    1.38 
  -6   0  -3   -0.31    0.23 
  -6   0  -3   -0.08    0.25 
   6   0   3    0.29    0.23 
  -7   0  -3   12.69    1.76 
  -7   0  -3   10.58    1.69 
  -8   0  -3    0.33    0.35 
  -8   0  -3   -0.34    0.23 
  -9   0  -3    0.22    0.34 
  -9   0  -3    0.51    0.32 
 -10   0  -3    1.07    0.70 
 -10   0  -3    2.66    0.67 
  -8   1   3    7.12    1.50 
  -8   1   3    5.45    1.42 
  -7   1   3   26.38    2.44 
  -7   1   3   22.16    2.07 
  -6   1   3    0.26    0.33 
  -6   1   3    0.96    0.32 
  -5   1   3    1.76    0.60 
  -5   1   3    3.88    1.07 
   4  -1  -3   25.62    0.71 
   4  -1  -3   24.19    0.68 
  -4   1   3   24.02    1.91 
  -4   1   3   26.57    1.93 
   3  -1  -3   14.67    0.66 
  -3   1   3   15.06    1.39 
  -3   1   3   18.20    1.49 
  -3   1   3   15.25    0.69 
   2  -1  -3   36.40    1.18 
  -2   1   3   35.51    1.18 
  -2   1   3   33.60    1.86 
  -2   1   3   36.11    1.94 
   1  -1  -3    1.02    0.43 
   1  -1  -3    1.65    0.34 
  -1   1   3    1.15    0.33 
  -1   1   3    1.52    0.59 
  -1   1   3    0.91    0.44 
   0  -1  -3    0.43    0.28 
   0  -1  -3    1.26    0.39 
   0  -1  -3    0.47    0.34 
   0   1   3    0.60    0.39 
   0   1   3    0.00    0.28 
  -1  -1  -3  113.03    2.62 
  -1  -1  -3  110.71    2.42 
  -1  -1  -3  113.44    2.76 
  -1  -1  -3  110.95    2.65 
   1   1   3  112.03    2.67 
   1   1   3  108.52    2.67 
  -2  -1  -3  419.13    6.56 
  -2  -1  -3  418.91    6.99 
   2   1   3  419.47    6.57 
   2   1   3  422.21    6.86 
  -3  -1  -3  108.84    3.18 
  -3  -1  -3  106.52    2.80 
   3   1   3  108.54    2.87 
  -4  -1  -3   -0.10    0.41 
  -4  -1  -3    0.65    0.44 
   4   1   3    0.11    0.28 
  -5  -1  -3   16.60    1.33 
  -5  -1  -3   13.83    1.38 
   5   1   3   15.61    1.11 
  -6  -1  -3    3.14    0.76 
  -6  -1  -3    2.49    0.79 
   6   1   3    2.35    0.55 
  -7  -1  -3   15.56    1.49 
  -7  -1  -3   15.10    1.99 
   7   1   3   15.99    1.14 
  -8  -1  -3    0.51    0.34 
  -8  -1  -3    0.97    0.61 
  -9  -1  -3   10.40    1.92 
  -9  -1  -3   14.80    1.52 
 -10  -1  -3    4.53    1.18 
 -10  -1  -3    4.93    0.84 
  -8   2   3    1.75    0.68 
  -8   2   3    1.54    0.57 
  -7   2   3    2.84    0.85 
  -7   2   3    2.86    1.03 
  -6   2   3   -0.55    0.29 
  -6   2   3    0.12    0.40 
  -5   2   3    0.88    0.43 
  -5   2   3    0.99    0.45 
  -4   2   3    5.83    1.17 
  -4   2   3    4.41    1.07 
   3  -2  -3   10.98    0.52 
  -3   2   3   10.03    0.51 
  -3   2   3    8.97    1.33 
  -3   2   3   11.29    1.49 
   2  -2  -3   -0.05    0.07 
  -2   2   3    0.08    0.14 
  -2   2   3    0.18    0.37 
  -2   2   3   -0.20    0.33 
   1  -2  -3   15.53    0.84 
   1  -2  -3   15.96    1.16 
  -1   2   3   12.97    1.15 
  -1   2   3   15.38    1.23 
  -1   2   3   15.80    0.88 
   0  -2  -3   43.46    1.54 
   0  -2  -3   45.24    1.77 
   0   2   3   44.25    1.78 
   0   2   3   44.10    1.59 
  -1  -2  -3   11.10    0.88 
  -1  -2  -3   12.05    0.82 
   1   2   3   13.06    0.89 
   1   2   3   12.68    0.92 
  -2  -2  -3  223.30    3.94 
  -2  -2  -3  225.68    4.60 
   2   2   3  220.54    3.76 
   2   2   3  219.50    4.47 
  -3  -2  -3  128.01    2.87 
  -3  -2  -3  128.61    3.50 
   3   2   3  124.50    2.77 
   3   2   3  126.26    3.28 
  -4  -2  -3   40.16    2.06 
  -4  -2  -3   40.61    1.69 
   4   2   3   39.60    1.80 
  -5  -2  -3   62.47    2.87 
  -5  -2  -3   64.53    2.41 
   5   2   3   63.37    2.40 
  -6  -2  -3    0.65    0.34 
  -6  -2  -3    0.10    0.25 
   6   2   3    0.43    0.34 
  -7  -2  -3    2.07    0.65 
  -7  -2  -3    2.20    0.70 
   7   2   3    1.58    0.46 
  -8  -2  -3    1.38    0.55 
  -8  -2  -3    1.85    0.61 
  -9  -2  -3    4.34    0.86 
  -9  -2  -3    2.56    0.81 
 -10  -2  -3   -0.29    0.47 
  -8   3   3    6.63    1.42 
  -8   3   3    5.33    1.36 
  -7   3   3   -0.91    0.39 
  -7   3   3    1.68    0.52 
  -6   3   3   18.50    2.44 
  -6   3   3   17.46    2.52 
  -5   3   3   12.43    1.90 
  -5   3   3   13.84    2.05 
  -4   3   3   30.02    2.26 
  -4   3   3   26.95    2.13 
   3  -3  -3    8.60    0.48 
  -3   3   3    9.54    1.41 
  -3   3   3    8.62    0.53 
  -3   3   3    7.30    1.29 
   2  -3  -3    5.42    0.43 
  -2   3   3    5.96    1.01 
  -2   3   3    5.14    0.51 
  -2   3   3    5.32    1.04 
   1  -3  -3    1.63    0.55 
  -1   3   3    1.66    0.61 
  -1   3   3    1.76    0.42 
   0  -3  -3    0.36    0.33 
   0   3   3    0.39    0.40 
   0   3   3   -0.25    0.22 
  -1  -3  -3   32.12    1.51 
   1   3   3   31.07    1.39 
   1   3   3   33.20    1.56 
  -2  -3  -3   42.70    1.29 
  -2  -3  -3   43.54    1.41 
  -2  -3  -3   42.65    1.82 
   2   3   3   42.11    1.85 
  -3  -3  -3   69.87    1.81 
  -3  -3  -3   69.72    2.54 
   3   3   3   67.49    2.48 
   3   3   3   72.01    1.71 
  -4  -3  -3    0.25    0.46 
  -4  -3  -3    0.82    0.34 
   4   3   3    1.09    0.22 
   4   3   3    0.53    0.40 
  -5  -3  -3   13.45    0.99 
  -5  -3  -3   12.46    1.28 
   5   3   3   12.10    1.16 
  -6  -3  -3    1.73    0.49 
  -6  -3  -3    2.60    0.75 
   6   3   3    2.34    0.66 
  -7  -3  -3    8.83    1.48 
  -7  -3  -3   10.06    0.99 
   7   3   3    8.08    1.16 
  -8  -3  -3    9.61    1.68 
  -8  -3  -3   10.54    1.44 
   8   3   3   11.69    1.13 
  -9  -3  -3    3.03    1.05 
  -9  -3  -3    3.31    0.83 
 -10  -3  -3   -0.35    0.50 
  -7   4   3    2.03    0.62 
  -7   4   3    1.75    0.78 
  -6   4   3    7.73    1.61 
  -6   4   3    4.85    1.26 
  -5   4   3    3.12    0.89 
  -5   4   3    5.47    1.21 
  -4   4   3   37.44    2.60 
  -4   4   3   36.71    2.56 
  -3   4   3    1.75    0.32 
  -3   4   3    1.92    0.70 
  -3   4   3    2.25    0.72 
   2  -4  -3   11.18    1.12 
  -2   4   3   10.27    1.47 
  -2   4   3   11.41    0.79 
  -2   4   3   12.09    1.53 
   1  -4  -3    0.12    0.26 
  -1   4   3    0.06    0.42 
  -1   4   3   -0.10    0.20 
   0  -4  -3   15.03    1.12 
   0   4   3   14.12    1.18 
   0   4   3   12.03    0.98 
  -1  -4  -3   63.64    2.25 
   1   4   3   65.82    2.41 
   1   4   3   64.95    2.16 
  -2  -4  -3   28.89    1.53 
  -2  -4  -3   26.85    1.10 
   2   4   3   27.71    1.16 
   2   4   3   27.81    1.63 
  -3  -4  -3   36.79    1.15 
  -3  -4  -3   35.30    1.12 
  -3  -4  -3   34.70    1.79 
   3   4   3   35.61    1.91 
  -4  -4  -3   41.40    1.30 
  -4  -4  -3   39.13    2.12 
   4   4   3   40.37    1.18 
   4   4   3   40.60    2.10 
  -5  -4  -3   64.29    1.95 
  -5  -4  -3   66.46    2.93 
   5   4   3   63.82    2.73 
   5   4   3   63.73    1.87 
  -6  -4  -3    0.52    0.23 
  -6  -4  -3    2.69    0.75 
   6   4   3    0.17    0.30 
  -7  -4  -3    1.99    0.61 
  -7  -4  -3    2.05    0.52 
   7   4   3    2.55    0.69 
  -8  -4  -3   21.01    1.50 
  -8  -4  -3   22.69    2.13 
   8   4   3   23.88    1.75 
  -9  -4  -3   18.07    2.50 
 -10  -4  -3   17.34    2.65 
  -7   5   3    2.09    0.57 
  -7   5   3    1.02    0.77 
  -6   5   3    1.59    0.55 
  -6   5   3    0.26    0.31 
  -5   5   3    9.70    1.80 
  -5   5   3    5.75    1.24 
  -4   5   3    3.49    0.88 
  -4   5   3    5.14    1.19 
   3  -5  -3    4.02    0.94 
  -3   5   3    4.20    1.05 
  -3   5   3    1.90    0.69 
  -3   5   3    3.43    0.50 
   2  -5  -3    0.15    0.26 
  -2   5   3   -0.55    0.19 
  -2   5   3    0.14    0.20 
  -2   5   3    0.36    0.34 
   1  -5  -3   24.16    1.57 
  -1   5   3   24.00    1.78 
  -1   5   3   23.87    1.39 
   0  -5  -3    1.09    0.43 
   0   5   3    0.65    0.35 
   0   5   3    1.42    0.53 
  -1  -5  -3    0.20    0.30 
   1   5   3    0.04    0.30 
   1   5   3   -0.06    0.27 
  -2  -5  -3    0.00    0.28 
  -2  -5  -3    0.18    0.07 
   2   5   3    0.14    0.19 
   2   5   3    0.12    0.37 
  -3  -5  -3   18.37    1.35 
  -3  -5  -3   18.43    0.75 
  -3  -5  -3   18.72    0.75 
   3   5   3   18.92    1.50 
  -4  -5  -3   28.08    0.81 
  -4  -5  -3   28.35    0.81 
  -4  -5  -3   28.96    1.80 
   4   5   3   27.90    1.84 
  -5  -5  -3    0.96    0.22 
  -5  -5  -3    0.98    0.48 
   5   5   3    1.38    0.57 
   5   5   3    0.65    0.13 
  -6  -5  -3    4.11    0.98 
  -6  -5  -3    4.22    0.41 
   6   5   3    3.31    0.88 
  -7  -5  -3    7.10    1.36 
  -7  -5  -3    6.63    0.68 
   7   5   3    7.56    1.24 
  -8  -5  -3    0.48    0.34 
   8   5   3   -0.32    0.22 
  -9  -5  -3    0.55    0.44 
 -10  -5  -3    0.36    0.46 
  -6   6   3   -0.47    0.36 
  -6   6   3    0.25    0.44 
  -5   6   3   -0.20    0.36 
  -5   6   3    0.43    0.36 
   4  -6  -3   21.88    1.87 
  -4   6   3   23.93    2.06 
  -4   6   3   24.20    2.22 
   3  -6  -3    5.15    1.01 
  -3   6   3    5.42    1.21 
  -3   6   3    3.09    0.73 
  -3   6   3    4.95    1.06 
   2  -6  -3   10.70    1.10 
  -2   6   3   10.44    0.90 
  -2   6   3   11.84    1.70 
   1  -6  -3    0.45    0.27 
  -1   6   3    0.49    0.38 
  -1   6   3    0.48    0.25 
   0  -6  -3    4.63    0.84 
   0   6   3    3.97    0.79 
   0   6   3    3.85    0.82 
  -1  -6  -3   35.56    1.78 
   1   6   3   34.02    1.74 
   1   6   3   34.31    1.96 
  -2  -6  -3    0.10    0.25 
   2   6   3    0.08    0.25 
   2   6   3    0.10    0.15 
  -3  -6  -3    0.45    0.10 
  -3  -6  -3    0.23    0.09 
  -3  -6  -3    0.81    0.37 
   3   6   3    0.60    0.34 
  -4  -6  -3    9.48    1.23 
   4   6   3   11.01    1.49 
  -5  -6  -3    3.31    0.86 
   5   6   3    3.17    0.79 
  -6  -6  -3    3.31    0.86 
   6   6   3    3.02    0.80 
  -7  -6  -3    7.41    1.31 
   7   6   3    6.37    1.25 
  -8  -6  -3    2.10    0.75 
   8   6   3    2.26    0.79 
  -9  -6  -3    5.05    1.33 
   9   6   3    3.89    0.90 
 -10  -6  -3    7.58    1.68 
   6  -7  -3    0.68    0.38 
  -6   7   3    0.52    0.38 
  -6   7   3    1.92    0.55 
   5  -7  -3   -0.63    0.27 
  -5   7   3   -0.39    0.32 
  -5   7   3    0.30    0.55 
   4  -7  -3    6.00    1.20 
  -4   7   3    6.23    1.35 
  -4   7   3    3.66    0.98 
   3  -7  -3    0.09    0.21 
  -3   7   3    0.42    0.35 
   2  -7  -3    7.04    1.17 
  -2   7   3    7.30    1.03 
  -2   7   3    6.48    1.34 
   1  -7  -3    0.73    0.26 
  -1   7   3   -0.11    0.20 
  -1   7   3   -0.17    0.28 
   0  -7  -3   17.32    1.30 
   0   7   3   18.82    1.47 
   0   7   3   15.57    1.39 
  -1  -7  -3    1.21    0.41 
   1   7   3    1.68    0.52 
   1   7   3    0.95    0.46 
  -2  -7  -3    2.58    0.59 
   2   7   3    1.97    0.48 
   2   7   3    3.07    0.84 
  -3  -7  -3   34.73    1.10 
  -3  -7  -3   38.23    1.93 
   3   7   3   37.03    2.29 
   3   7   3   34.94    1.21 
  -4  -7  -3   -0.18    0.31 
   4   7   3    0.23    0.33 
  -5  -7  -3    8.40    1.29 
   5   7   3    7.76    1.41 
  -6  -7  -3    2.01    0.65 
   6   7   3    0.03    0.36 
  -7  -7  -3    0.18    0.24 
   7   7   3    0.97    0.47 
  -8  -7  -3    4.26    1.07 
   8   7   3    3.77    0.97 
  -9  -7  -3    0.83    0.41 
   9   7   3    0.41    0.40 
 -10  -7  -3    2.00    0.46 
   5  -8  -3    1.92    0.40 
  -5   8   3    2.29    0.61 
  -5   8   3    0.76    0.33 
  -4   8   3    1.15    0.59 
   3  -8  -3    4.83    1.04 
  -3   8   3    4.51    1.07 
   2  -8  -3    0.61    0.34 
  -2   8   3    0.31    0.31 
  -2   8   3    0.38    0.24 
   1  -8  -3   -0.26    0.19 
  -1   8   3   -0.23    0.26 
  -1   8   3    0.06    0.27 
   0  -8  -3    2.65    0.66 
   0   8   3    2.43    0.63 
   0   8   3    2.76    0.74 
  -1  -8  -3   23.53    1.49 
   1   8   3   24.62    1.63 
   1   8   3   23.65    1.83 
  -2  -8  -3   17.73    1.27 
   2   8   3   17.79    1.64 
   2   8   3   16.80    1.14 
  -3  -8  -3    6.03    0.95 
   3   8   3    3.57    0.88 
  -4  -8  -3    3.60    0.76 
   4   8   3    5.06    1.16 
  -5  -8  -3    0.26    0.29 
   5   8   3    0.21    0.33 
  -6  -8  -3    2.34    0.70 
  -7  -8  -3    0.13    0.33 
   7   8   3    0.43    0.45 
  -8  -8  -3   17.87    1.81 
   8   8   3   20.46    1.98 
  -9  -8  -3    0.36    0.39 
   9   8   3    0.15    0.29 
  -4   9   3    0.67    0.41 
  -3   9   3    9.86    1.67 
  -2   9   3    4.37    0.92 
   1  -9  -3    3.16    0.68 
  -1   9   3    3.44    0.95 
  -1   9   3    2.65    0.65 
   0  -9  -3    0.59    0.24 
   0   9   3    0.39    0.33 
   0   9   3    1.51    0.55 
  -1  -9  -3   13.03    1.08 
   1   9   3   17.01    1.57 
   1   9   3   15.91    1.34 
  -2  -9  -3   -0.32    0.15 
   2   9   3   -0.52    0.19 
  -3  -9  -3    1.26    0.44 
   3   9   3    0.93    0.50 
  -4  -9  -3   36.11    2.02 
   4   9   3   35.57    2.55 
  -5  -9  -3    0.18    0.27 
   5   9   3   -0.42    0.27 
  -6  -9  -3    2.55    0.69 
   6   9   3    2.52    0.83 
  -7  -9  -3    7.75    1.32 
   7   9   3   11.98    1.91 
  -8  -9  -3    0.48    0.32 
   8   9   3    0.18    0.29 
  -9  -9  -3    0.56    0.32 
   9   9   3    0.44    0.33 
  -3  10   3    0.21    0.38 
  -2  10   3   -0.11    0.34 
  -1  10   3    3.55    0.83 
  -1  10   3    3.97    0.92 
   0  10   3    1.55    0.49 
   0  10   3    1.35    0.41 
   1  10   3    1.12    0.41 
   2  10   3    1.88    0.56 
   3  10   3    0.18    0.24 
   4  10   3   14.65    2.07 
   5  10   3    0.53    0.48 
   6  10   3    8.30    1.70 
   7  10   3   -0.04    0.34 
   8  10   3   -0.12    0.36 
  -2  11   3    1.83    0.49 
   0  11   3    2.61    0.68 
   1  11   3    2.37    0.65 
   2  11   3   -0.76    0.30 
   3  11   3    2.03    0.72 
   4  11   3   14.95    2.12 
   5  11   3    0.15    0.26 
   6  11   3    0.03    0.30 
   7  11   3   11.67    1.97 
   8  11   3    6.72    1.33 
   0  12   3   -0.15    0.33 
   1  12   3    6.46    1.17 
   2  12   3    1.22    0.45 
   3  12   3    0.46    0.37 
   4  12   3    7.50    1.56 
   5  12   3   -1.18    0.33 
   6  12   3    0.56    0.37 
   4  12  -4    1.34    0.50 
   3  12  -4    0.43    0.55 
   2  12  -4   -1.06    0.34 
   1  12  -4   -0.56    0.33 
   0  12  -4    0.86    0.40 
  -1  12  -4    0.76    0.42 
   6  11  -4    0.90    0.39 
   5  11  -4    2.65    0.86 
   4  11  -4   -0.79    0.29 
   3  11  -4    2.04    0.91 
   2  11  -4    7.80    1.58 
   1  11  -4   -0.68    0.26 
   0  11  -4    0.57    0.32 
  -1  11  -4    0.28    0.34 
  -2  11  -4   -0.29    0.33 
  -2  11  -4   -0.25    0.28 
  -3  11  -4    0.15    0.37 
   7  10  -4    0.22    0.35 
   6  10  -4    0.00    0.31 
   5  10  -4    3.95    1.01 
   4  10  -4    2.33    0.88 
   3  10  -4   -0.01    0.29 
   2  10  -4    6.13    1.29 
   1  10  -4   12.43    1.91 
   0  10  -4    6.03    1.20 
   0  10  -4    7.05    1.28 
  -1  10  -4    1.67    0.39 
  -1  10  -4    1.20    0.60 
  -2  10  -4    1.05    0.46 
  -2  10  -4    0.17    0.26 
  -3  10  -4   26.07    2.29 
  -3  10  -4   20.53    1.69 
  -4  10  -4    4.55    0.92 
   7   9  -4    0.89    0.32 
   6   9  -4   -0.07    0.28 
   5   9  -4    0.45    0.38 
   4   9  -4   -0.04    0.31 
   3   9  -4    0.54    0.35 
   2   9  -4    0.63    0.35 
   1   9  -4    4.56    0.92 
   1   9  -4    3.70    1.02 
   0   9  -4    1.55    0.44 
   0   9  -4    1.02    0.44 
  -1   9  -4    0.24    0.24 
  -1   9  -4    0.02    0.28 
  -2   9  -4   -0.10    0.23 
  -2   9  -4    0.40    0.31 
  -3   9  -4   12.10    1.90 
  -3   9  -4    9.33    1.36 
  -4   9  -4   -0.37    0.38 
  -5   9  -4    9.52    2.06 
   7   8  -4    0.61    0.32 
   6   8  -4    0.06    0.25 
   5   8  -4   14.06    2.03 
   4   8  -4    2.40    0.83 
   3   8  -4    9.63    1.56 
   2   8  -4    0.52    0.46 
   2   8  -4    0.98    0.31 
   1   8  -4    0.34    0.31 
   1   8  -4    0.51    0.24 
   0   8  -4   69.83    3.03 
   0   8  -4   63.94    3.25 
  -1   8  -4   42.86    2.57 
  -1   8  -4   44.33    2.57 
  -2   8  -4   47.38    2.86 
  -2   8  -4   51.18    2.78 
  -3   8  -4    4.84    1.07 
  -3   8  -4    3.45    0.75 
  -4   8  -4   11.21    1.84 
  -4   8  -4   11.44    1.08 
  -5   8  -4    1.03    0.56 
  -6   8  -4   -0.11    0.42 
  -8  -7   4    2.29    0.77 
   7   7  -4   14.08    1.91 
  -7  -7   4   10.41    1.70 
   6   7  -4    0.38    0.33 
  -6  -7   4    0.31    0.22 
   5   7  -4   28.64    2.16 
  -5  -7   4   26.95    1.86 
   4   7  -4   12.56    1.69 
   4   7  -4   12.23    1.69 
  -4  -7   4   11.86    1.07 
   3   7  -4    1.66    0.61 
   3   7  -4    1.36    0.44 
  -3  -7   4    1.36    0.33 
   2   7  -4    4.50    0.78 
   2   7  -4    3.97    0.96 
   2   7  -4    3.21    0.26 
   1   7  -4    2.65    0.70 
   1   7  -4    2.31    0.60 
   0   7  -4    9.72    1.28 
   0   7  -4    8.20    1.25 
  -1   7  -4   11.65    1.54 
  -1   7  -4   12.68    1.63 
  -2   7  -4    7.14    1.29 
  -2   7  -4    7.17    1.14 
  -3   7  -4   12.56    1.83 
  -3   7  -4    9.87    1.33 
  -4   7  -4   11.29    1.08 
  -4   7  -4   10.86    1.88 
  -5   7  -4    2.27    0.86 
  -6   7  -4    7.95    1.72 
  -7   7  -4    2.76    0.73 
  -8  -6   4    2.80    0.91 
   7   6  -4   29.89    2.10 
  -7  -6   4   28.41    2.33 
   6   6  -4    9.77    1.52 
  -6  -6   4    9.98    1.57 
   5   6  -4   42.44    1.91 
   5   6  -4   42.93    2.56 
  -5  -6   4   43.16    2.46 
   4   6  -4    0.12    0.27 
  -4  -6   4   -0.05    0.14 
   3   6  -4    2.16    0.70 
   3   6  -4    3.38    0.65 
  -3  -6   4    3.52    0.65 
   2   6  -4    9.10    1.30 
   2   6  -4    8.40    0.63 
   2   6  -4    8.65    0.85 
   2   6  -4    8.52    0.51 
   1   6  -4    1.96    0.19 
   1   6  -4    2.34    0.61 
   1   6  -4    2.44    0.69 
   1   6  -4    2.26    0.17 
   0   6  -4    0.84    0.41 
   0   6  -4    2.10    0.65 
  -1   6  -4    9.61    1.38 
  -1   6  -4    9.37    1.24 
  -2   6  -4    5.26    0.91 
  -2   6  -4    6.79    1.23 
  -2   6  -4    6.22    0.55 
  -3   6  -4    2.36    0.78 
  -3   6  -4    0.15    0.21 
  -3   6  -4    0.77    0.34 
  -4   6  -4    2.52    0.62 
  -4   6  -4    2.17    0.80 
  -4   6  -4    2.72    0.61 
  -5   6  -4    7.52    1.24 
  -5   6  -4    4.99    0.78 
  -5   6  -4    5.39    1.28 
  -6   6  -4   13.26    2.11 
  -6   6  -4   15.20    1.52 
  -7   6  -4   -1.01    0.36 
  -7   6  -4    0.19    0.26 
  -8   6  -4    1.24    0.65 
  -8  -5   4    0.29    0.46 
  -7  -5   4    4.78    1.10 
   6   5  -4    6.12    1.12 
  -6  -5   4    9.71    1.30 
  -6  -5   4    6.80    1.27 
   5   5  -4   51.87    2.70 
  -5  -5   4   51.94    2.42 
  -5  -5   4   54.88    2.91 
   4   5  -4   13.75    1.65 
   4   5  -4   13.18    1.02 
  -4  -5   4   14.14    1.27 
   3   5  -4    1.71    0.56 
  -3  -5   4    3.23    0.67 
   2   5  -4    0.10    0.34 
   2   5  -4    0.46    0.25 
   2   5  -4   -0.15    0.14 
  -2  -5   4    0.27    0.17 
   1   5  -4   14.01    1.13 
   1   5  -4   14.62    0.73 
   1   5  -4   15.36    0.73 
   1   5  -4   18.73    1.47 
  -1  -5   4   15.46    1.38 
   0   5  -4   24.19    1.56 
   0   5  -4   22.57    0.71 
   0   5  -4   23.85    1.64 
   0   5  -4   23.93    0.73 
   0  -5   4   24.35    1.69 
  -1   5  -4    5.72    0.91 
  -1   5  -4    5.05    0.96 
  -1   5  -4    5.32    0.41 
   1  -5   4    5.11    0.36 
   1  -5   4    5.45    0.97 
  -2   5  -4   14.80    0.89 
  -2   5  -4   14.49    1.39 
   2  -5   4   14.30    1.23 
   2  -5   4    9.93    0.68 
  -3   5  -4   21.75    1.34 
  -3   5  -4   23.98    1.92 
   3  -5   4   23.44    1.54 
  -4   5  -4    2.35    0.63 
  -4   5  -4    2.38    0.55 
  -4   5  -4    2.16    0.82 
   4  -5   4    2.56    0.61 
  -5   5  -4   -0.07    0.29 
  -5   5  -4    0.80    0.30 
  -5   5  -4    0.39    0.24 
   5  -5   4   -0.03    0.18 
  -6   5  -4   18.75    1.74 
  -6   5  -4   16.90    2.42 
  -7   5  -4   11.71    2.02 
  -7   5  -4   12.14    1.94 
  -8   5  -4    0.16    0.50 
  -8   5  -4   -0.51    0.31 
  -9  -4   4   -0.38    0.50 
  -8  -4   4    5.60    1.28 
  -7  -4   4    2.16    0.76 
  -7  -4   4    1.24    0.38 
   6   4  -4    5.86    1.02 
  -6  -4   4    6.94    1.33 
  -6  -4   4    6.03    1.12 
   5   4  -4    1.57    0.50 
  -5  -4   4    2.57    0.75 
  -5  -4   4    1.19    0.46 
   4   4  -4    0.36    0.30 
  -4  -4   4    0.51    0.26 
  -4  -4   4    1.17    0.45 
   3   4  -4    1.27    0.42 
   3   4  -4    0.10    0.31 
  -3  -4   4    1.31    0.46 
  -3  -4   4    1.07    0.41 
   2   4  -4   96.23    2.73 
   2   4  -4   93.90    3.25 
  -2  -4   4   97.03    3.31 
  -2  -4   4   95.13    2.82 
   1   4  -4    0.65    0.39 
   1   4  -4    1.60    0.55 
   1   4  -4    2.12    0.37 
   1   4  -4    1.90    0.39 
  -1  -4   4    1.76    0.60 
   0   4  -4  190.92    3.38 
   0   4  -4  196.71    4.56 
   0   4  -4  191.26    3.40 
   0  -4   4  192.60    4.80 
  -1   4  -4    5.15    0.99 
  -1   4  -4    5.26    0.51 
   1  -4   4    5.01    0.43 
   1  -4   4    4.51    0.89 
  -2   4  -4   11.14    0.83 
  -2   4  -4   13.11    1.33 
   2  -4   4   10.83    1.05 
  -3   4  -4    1.94    0.71 
  -3   4  -4    2.27    0.58 
   3  -4   4    3.03    0.67 
  -4   4  -4    1.59    0.71 
  -4   4  -4    1.78    0.59 
   4  -4   4    2.36    0.58 
  -5   4  -4   10.37    1.45 
  -5   4  -4   10.93    1.76 
   5  -4   4    9.88    0.91 
  -6   4  -4    8.23    1.60 
  -6   4  -4    9.24    1.52 
  -7   4  -4   12.26    2.06 
  -7   4  -4   12.61    1.92 
  -8   4  -4    0.41    0.30 
  -8   4  -4   -0.28    0.41 
  -9   4  -4    0.75    0.40 
  -9   4  -4    0.90    0.57 
  -9  -3   4    0.22    0.41 
  -8  -3   4    1.24    0.43 
  -8  -3   4    0.05    0.37 
  -7  -3   4   13.94    1.90 
  -7  -3   4   11.58    1.91 
   6   3  -4    6.15    0.94 
  -6  -3   4    7.31    1.38 
  -6  -3   4    6.60    1.21 
   5   3  -4   -0.02    0.18 
  -5  -3   4   -0.29    0.20 
  -5  -3   4   -0.59    0.17 
   4   3  -4    0.18    0.20 
  -4  -3   4    0.25    0.31 
  -4  -3   4   -0.11    0.23 
   3   3  -4   -0.03    0.14 
  -3  -3   4    0.12    0.21 
  -3  -3   4   -0.49    0.19 
  -3  -3   4    0.35    0.34 
   2   3  -4    2.00    0.50 
  -2  -3   4    2.25    0.61 
  -2  -3   4    2.09    0.60 
  -2  -3   4    1.35    0.47 
   1   3  -4   40.34    1.55 
   1   3  -4   35.81    1.74 
  -1  -3   4   41.75    1.94 
   0   3  -4   43.06    1.89 
   0   3  -4   45.83    1.50 
   0   3  -4   44.06    1.46 
   0  -3   4   45.07    2.03 
   0  -3   4   44.85    1.42 
  -1   3  -4    7.21    1.02 
  -1   3  -4    7.99    0.64 
   1  -3   4    6.31    0.93 
   1  -3   4    7.20    0.56 
  -2   3  -4   10.00    0.85 
  -2   3  -4    8.48    1.29 
   2  -3   4    9.14    1.07 
  -3   3  -4    5.53    1.09 
  -3   3  -4    5.24    0.83 
   3  -3   4    5.95    0.89 
  -4   3  -4   10.80    1.53 
  -4   3  -4   11.42    1.15 
   4  -3   4   12.10    0.99 
  -5   3  -4   16.34    1.47 
  -5   3  -4   16.93    1.65 
   5  -3   4   16.71    1.14 
  -6   3  -4   -0.37    0.31 
  -6   3  -4    0.39    0.28 
   6  -3   4   -0.12    0.14 
  -7   3  -4    0.84    0.47 
  -7   3  -4   -0.38    0.30 
  -8   3  -4    1.66    0.73 
  -8   3  -4    0.42    0.33 
  -9   3  -4    6.59    1.45 
  -9   3  -4    5.26    1.43 
  -8  -2   4   -0.72    0.30 
  -8  -2   4    0.25    0.34 
  -7  -2   4    1.09    0.44 
  -7  -2   4    2.33    0.95 
  -6  -2   4    3.18    0.87 
  -6  -2   4    2.99    0.91 
   5   2  -4   10.63    0.93 
  -5  -2   4    8.95    1.46 
  -5  -2   4   12.73    1.30 
   4   2  -4    0.27    0.20 
  -4  -2   4    0.77    0.37 
  -4  -2   4    0.21    0.24 
   3   2  -4    4.61    0.76 
  -3  -2   4    3.66    0.79 
  -3  -2   4    3.99    0.69 
  -3  -2   4    3.95    0.83 
  -2  -2   4   76.95    2.55 
  -2  -2   4   74.80    2.68 
  -2  -2   4   79.70    2.76 
   1   2  -4    0.80    0.34 
   1   2  -4    1.29    0.41 
  -1  -2   4    1.61    0.51 
   0   2  -4   86.85    2.31 
   0   2  -4   85.72    2.65 
   0  -2   4   87.96    2.69 
  -1   2  -4   14.12    0.90 
  -1   2  -4   13.98    1.14 
   1  -2   4   14.06    1.08 
  -2   2  -4    4.26    0.84 
  -2   2  -4    5.05    0.72 
   2  -2   4    5.51    0.83 
  -3   2  -4   86.80    3.16 
  -3   2  -4   85.13    2.78 
   3  -2   4   83.43    2.63 
  -4   2  -4    1.18    0.57 
  -4   2  -4    0.05    0.36 
   4  -2   4   -0.23    0.18 
  -5   2  -4   52.50    2.70 
  -5   2  -4   49.65    2.73 
   5  -2   4   52.78    2.04 
  -6   2  -4    2.56    0.73 
  -6   2  -4    2.44    0.76 
   6  -2   4    3.32    0.55 
  -7   2  -4    0.75    0.40 
  -7   2  -4    0.73    0.41 
  -8   2  -4    1.09    0.51 
  -8   2  -4    0.62    0.47 
  -9   2  -4   -0.84    0.36 
  -9   2  -4    0.66    0.41 
  -8  -1   4   -0.74    0.33 
  -8  -1   4    0.16    0.34 
  -7  -1   4    3.36    1.04 
  -7  -1   4    4.18    0.98 
  -6  -1   4    0.21    0.36 
  -6  -1   4   -0.10    0.22 
   5   1  -4    7.73    0.68 
  -5  -1   4    8.63    1.37 
  -5  -1   4   10.86    1.69 
   4   1  -4    0.32    0.19 
  -4  -1   4    1.32    0.55 
  -4  -1   4    0.03    0.29 
  -3  -1   4   18.96    1.55 
  -3  -1   4   19.74    1.53 
  -3  -1   4   20.61    1.18 
  -2  -1   4   25.56    1.33 
  -2  -1   4   25.01    1.59 
  -2  -1   4   25.76    1.59 
   1   1  -4   71.05    2.36 
  -1  -1   4   71.91    2.52 
  -1  -1   4   72.42    2.29 
  -1  -1   4   72.61    2.47 
   0   1  -4   15.61    1.01 
   0   1  -4   16.07    1.01 
   0  -1   4   17.57    1.12 
  -1   1  -4    1.01    0.42 
  -1   1  -4    1.00    0.49 
   1  -1   4    1.35    0.35 
   1  -1   4    1.30    0.48 
  -2   1  -4    0.07    0.34 
  -2   1  -4    0.08    0.39 
   2  -1   4    0.14    0.31 
  -3   1  -4   19.77    1.45 
  -3   1  -4   22.46    1.45 
   3  -1   4   20.63    1.26 
  -4   1  -4    1.28    0.53 
  -4   1  -4    1.01    0.58 
   4  -1   4    2.47    0.57 
  -5   1  -4   -0.48    0.23 
  -5   1  -4   -0.23    0.33 
   5  -1   4    0.53    0.26 
  -6   1  -4    2.23    0.80 
  -6   1  -4    1.09    0.60 
   6  -1   4    2.10    0.46 
  -7   1  -4   25.05    2.17 
  -7   1  -4   27.87    2.16 
  -8   1  -4    1.14    0.46 
  -8   1  -4    0.92    0.35 
  -9   1  -4   25.45    2.31 
  -9   1  -4   23.91    2.38 
 -10   1  -4    0.03    0.37 
 -10   1  -4   -0.04    0.39 
  -8   0   4   -0.09    0.39 
  -8   0   4    0.38    0.39 
  -7   0   4    9.04    1.64 
  -7   0   4    7.10    1.55 
  -6   0   4    0.10    0.22 
  -6   0   4   -0.10    0.32 
  -5   0   4    3.90    0.95 
  -5   0   4    4.56    1.00 
   4   0  -4   33.08    1.29 
   4   0  -4   30.41    1.14 
  -4   0   4   29.98    2.16 
  -4   0   4   32.77    2.14 
  -4   0   4   32.08    1.28 
  -3   0   4  194.52    5.45 
  -3   0   4  186.64    5.17 
  -3   0   4  198.00    3.95 
  -2   0   4   95.79    2.55 
  -2   0   4   98.71    3.37 
  -2   0   4   99.20    3.31 
   1   0  -4   45.25    1.94 
  -1   0   4   48.72    1.75 
  -1   0   4   47.81    2.07 
  -1   0   4   48.53    2.12 
   0   0  -4    1.60    0.48 
   0   0   4    1.81    0.47 
   0   0   4    1.41    0.54 
  -1   0  -4    9.58    0.89 
   1   0   4   11.21    0.92 
  -2   0  -4  326.34    5.99 
  -2   0  -4  323.62    6.03 
   2   0   4  330.24    5.99 
  -3   0  -4  243.49    5.35 
  -3   0  -4  262.87    5.42 
   3   0   4  246.84    5.04 
  -4   0  -4    9.82    1.29 
  -4   0  -4   10.11    1.25 
   4   0   4    9.97    1.12 
  -5   0  -4    3.49    0.84 
  -5   0  -4    4.02    0.94 
   5   0   4    3.19    0.64 
  -6   0  -4   26.62    1.90 
  -6   0  -4   24.39    1.98 
   6   0   4   23.85    1.42 
  -7   0  -4    0.70    0.49 
  -7   0  -4    1.25    0.53 
   7   0   4    1.41    0.37 
  -8   0  -4    9.42    1.60 
  -8   0  -4    8.43    1.67 
  -9   0  -4    5.10    1.27 
  -9   0  -4    4.81    1.01 
 -10   0  -4    1.76    0.60 
 -10   0  -4    2.41    0.66 
  -8   1   4    0.66    0.58 
  -8   1   4    2.66    0.74 
  -7   1   4    1.73    0.56 
  -7   1   4    1.16    0.46 
  -6   1   4    0.60    0.55 
  -6   1   4    0.74    0.36 
  -5   1   4   13.88    1.97 
  -5   1   4   14.58    1.99 
   4  -1  -4    9.93    0.51 
   4  -1  -4    9.41    0.56 
  -4   1   4   10.56    0.59 
  -4   1   4    9.95    1.54 
  -4   1   4   10.51    1.54 
   3  -1  -4   39.84    1.35 
  -3   1   4   38.69    2.36 
  -3   1   4   41.20    2.34 
  -3   1   4   40.02    1.39 
   2  -1  -4   18.71    0.92 
  -2   1   4   19.82    1.52 
  -2   1   4   20.20    1.54 
  -2   1   4   18.90    1.00 
   1  -1  -4    9.97    0.99 
  -1   1   4    9.83    0.80 
  -1   1   4    8.26    1.11 
   0   1   4   60.24    2.23 
   0   1   4   59.15    1.98 
  -1  -1  -4   13.10    1.01 
  -1  -1  -4   12.76    0.91 
   1   1   4   12.20    0.99 
  -2  -1  -4   20.41    1.30 
  -2  -1  -4   19.67    1.17 
   2   1   4   19.23    1.22 
  -3  -1  -4   41.65    1.77 
  -3  -1  -4   44.42    2.04 
   3   1   4   42.39    1.86 
  -4  -1  -4    0.33    0.38 
  -4  -1  -4    0.49    0.49 
   4   1   4    0.07    0.30 
  -5  -1  -4   32.47    2.09 
  -5  -1  -4   29.79    1.79 
   5   1   4   29.68    1.66 
  -6  -1  -4    9.75    1.48 
  -6  -1  -4   10.95    1.45 
   6   1   4   11.04    1.02 
  -7  -1  -4    0.02    0.32 
  -7  -1  -4    0.75    0.39 
   7   1   4    0.22    0.24 
  -8  -1  -4    8.78    1.59 
  -8  -1  -4   11.49    1.70 
  -9  -1  -4    0.56    0.30 
  -9  -1  -4    0.61    0.35 
 -10  -1  -4    0.54    0.38 
 -10  -1  -4    0.67    0.40 
  -8   2   4    2.39    0.60 
  -8   2   4    0.39    0.54 
  -7   2   4    7.79    1.63 
  -7   2   4   11.20    2.07 
  -6   2   4   17.49    2.42 
  -6   2   4   16.29    2.30 
  -5   2   4    5.58    1.18 
  -5   2   4    7.32    1.55 
  -4   2   4    3.08    0.85 
  -4   2   4    3.22    0.21 
  -4   2   4    2.83    0.82 
   3  -2  -4    2.90    0.29 
  -3   2   4    3.00    0.82 
  -3   2   4    2.72    0.81 
  -3   2   4    4.11    0.50 
   2  -2  -4   10.78    1.38 
   2  -2  -4    9.52    0.61 
  -2   2   4   12.41    1.61 
  -2   2   4    8.98    0.70 
  -2   2   4    8.79    1.32 
   1  -2  -4    0.46    0.37 
  -1   2   4    0.10    0.17 
  -1   2   4    0.02    0.40 
   0  -2  -4   12.01    1.03 
   0   2   4   12.31    0.95 
   0   2   4   11.58    1.07 
  -1  -2  -4    0.28    0.33 
   1   2   4    0.14    0.36 
   1   2   4    0.49    0.37 
  -2  -2  -4    8.90    0.92 
   2   2   4    9.32    1.08 
  -3  -2  -4  196.21    4.09 
  -3  -2  -4  197.23    4.68 
   3   2   4  191.76    4.51 
  -4  -2  -4   57.25    2.14 
  -4  -2  -4   59.77    2.64 
   4   2   4   56.29    2.32 
  -5  -2  -4   36.25    2.20 
  -5  -2  -4   35.95    1.83 
   5   2   4   35.96    1.91 
  -6  -2  -4   55.00    2.93 
  -6  -2  -4   55.55    2.49 
   6   2   4   54.04    2.43 
  -7  -2  -4    9.74    1.66 
  -7  -2  -4    8.04    1.25 
   7   2   4    7.95    1.15 
  -8  -2  -4    3.85    0.90 
  -8  -2  -4    2.12    0.74 
   8   2   4    2.61    0.59 
  -9  -2  -4    5.28    1.30 
  -9  -2  -4    5.54    1.18 
 -10  -2  -4    0.41    0.30 
 -10  -2  -4   -0.09    0.33 
  -7   3   4   11.83    2.15 
  -7   3   4   10.22    1.87 
  -6   3   4    0.64    0.39 
  -6   3   4    0.33    0.39 
  -5   3   4    3.48    1.03 
  -5   3   4    4.40    1.06 
  -4   3   4    1.11    0.46 
  -4   3   4    0.00    0.38 
   3  -3  -4    0.75    0.07 
  -3   3   4    1.04    0.52 
  -3   3   4    1.07    0.52 
  -3   3   4    0.51    0.15 
   2  -3  -4    3.27    0.78 
  -2   3   4    2.23    0.74 
  -2   3   4    2.19    0.74 
  -2   3   4    2.63    0.47 
   1  -3  -4    5.13    0.91 
  -1   3   4    5.53    1.06 
  -1   3   4    7.06    0.83 
   0  -3  -4   74.32    2.63 
   0   3   4   72.00    2.66 
   0   3   4   72.95    2.41 
  -1  -3  -4   11.40    1.02 
   1   3   4   12.38    1.04 
   1   3   4   11.72    1.03 
  -2  -3  -4   29.78    1.61 
  -2  -3  -4   29.93    1.25 
   2   3   4   30.91    1.67 
  -3  -3  -4   53.85    2.30 
  -3  -3  -4   49.65    1.72 
  -3  -3  -4   51.58    1.84 
   3   3   4   51.53    2.23 
   3   3   4   51.28    1.59 
  -4  -3  -4   30.02    1.43 
  -4  -3  -4   29.74    1.89 
   4   3   4   29.66    1.74 
  -5  -3  -4   22.36    1.31 
  -5  -3  -4   21.52    1.68 
   5   3   4   22.78    1.59 
  -6  -3  -4    5.47    1.10 
  -6  -3  -4    7.15    1.02 
   6   3   4    6.47    1.07 
  -7  -3  -4   55.34    3.20 
  -7  -3  -4   59.95    2.63 
   7   3   4   63.77    2.84 
  -8  -3  -4   12.47    1.91 
  -8  -3  -4   12.60    1.22 
   8   3   4   13.55    1.29 
  -9  -3  -4    0.22    0.25 
  -9  -3  -4   -0.54    0.27 
 -10  -3  -4    6.20    1.61 
  -7   4   4    3.80    1.41 
  -7   4   4    2.40    0.78 
  -6   4   4   27.92    2.49 
  -6   4   4   27.59    2.49 
  -5   4   4    0.42    0.38 
  -5   4   4    1.61    0.60 
  -4   4   4   16.35    2.15 
  -4   4   4   17.70    1.83 
   3  -4  -4    2.44    0.73 
  -3   4   4    2.37    0.78 
  -3   4   4    2.28    0.79 
  -3   4   4    2.86    0.44 
   2  -4  -4    9.37    1.36 
  -2   4   4    7.75    1.34 
  -2   4   4    8.30    0.70 
  -2   4   4    8.25    1.37 
   1  -4  -4    0.50    0.35 
  -1   4   4    0.26    0.21 
  -1   4   4    0.20    0.39 
   0  -4  -4   30.56    1.76 
   0   4   4   30.86    1.80 
   0   4   4   31.70    1.63 
  -1  -4  -4   13.30    1.14 
   1   4   4   11.92    1.13 
   1   4   4   12.52    1.09 
  -2  -4  -4    1.00    0.49 
   2   4   4    1.05    0.40 
   2   4   4   -0.04    0.32 
  -3  -4  -4   32.72    1.32 
  -3  -4  -4   34.10    1.27 
  -3  -4  -4   31.38    1.82 
   3   4   4   33.38    1.90 
  -4  -4  -4   15.78    0.91 
  -4  -4  -4   13.59    0.73 
  -4  -4  -4   14.02    1.34 
   4   4   4   14.57    0.75 
   4   4   4   14.57    1.33 
  -5  -4  -4   34.76    2.15 
  -5  -4  -4   36.78    1.53 
   5   4   4   37.34    2.16 
  -6  -4  -4    0.30    0.17 
  -6  -4  -4    0.01    0.23 
   6   4   4   -0.14    0.26 
  -7  -4  -4    0.10    0.18 
  -7  -4  -4    0.15    0.25 
   7   4   4    0.21    0.37 
  -8  -4  -4   45.51    3.04 
  -8  -4  -4   43.43    2.23 
   8   4   4   43.08    2.47 
  -9  -4  -4    0.51    0.37 
 -10  -4  -4    5.77    1.40 
  -6   5   4    5.61    1.31 
  -6   5   4    4.06    1.15 
  -5   5   4    0.58    0.31 
  -5   5   4    0.00    0.37 
   4  -5  -4   11.48    1.75 
  -4   5   4    6.79    1.37 
  -4   5   4    7.62    1.63 
   3  -5  -4   47.87    2.74 
  -3   5   4   46.33    2.92 
  -3   5   4   44.87    2.81 
  -3   5   4   47.80    1.73 
   2  -5  -4    0.12    0.21 
  -2   5   4    0.19    0.29 
  -2   5   4    0.12    0.17 
   1  -5  -4    6.44    1.07 
  -1   5   4    7.31    1.27 
  -1   5   4    6.52    0.90 
   0  -5  -4   -0.01    0.16 
   0   5   4   -0.24    0.27 
   0   5   4   -0.02    0.22 
  -1  -5  -4    1.02    0.45 
   1   5   4    1.03    0.49 
   1   5   4    1.72    0.56 
  -2  -5  -4   20.99    1.46 
   2   5   4   21.99    1.25 
   2   5   4   20.27    1.52 
  -3  -5  -4   18.18    0.87 
  -3  -5  -4   21.49    1.48 
  -3  -5  -4   19.60    0.91 
   3   5   4   22.63    1.67 
  -4  -5  -4   22.84    0.98 
  -4  -5  -4   23.27    0.96 
  -4  -5  -4   22.57    1.63 
   4   5   4   22.96    1.71 
  -5  -5  -4   55.68    2.78 
  -5  -5  -4   56.84    1.63 
  -5  -5  -4   58.69    1.72 
   5   5   4   57.75    1.55 
   5   5   4   58.88    2.85 
  -6  -5  -4    3.55    0.90 
  -6  -5  -4    2.08    0.39 
   6   5   4    1.84    0.71 
  -7  -5  -4    5.72    1.19 
  -7  -5  -4    4.31    0.70 
   7   5   4    4.74    1.14 
  -8  -5  -4    0.95    0.42 
   8   5   4    0.74    0.44 
  -9  -5  -4    0.08    0.36 
   9   5   4    0.92    0.34 
 -10  -5  -4    0.29    0.48 
   6  -6  -4    0.04    0.36 
  -6   6   4   -0.67    0.41 
  -6   6   4    0.00    0.36 
   5  -6  -4    3.18    0.95 
  -5   6   4    1.95    0.91 
  -5   6   4    3.43    0.91 
   4  -6  -4   30.74    2.35 
  -4   6   4   33.24    2.56 
  -4   6   4   33.34    2.69 
   3  -6  -4    0.44    0.35 
  -3   6   4    0.90    0.47 
   2  -6  -4    0.45    0.34 
  -2   6   4   -0.13    0.14 
  -2   6   4    0.42    0.40 
   1  -6  -4    2.24    0.64 
  -1   6   4    1.11    0.36 
  -1   6   4    1.27    0.62 
   0  -6  -4    0.29    0.26 
   0   6   4    0.36    0.30 
   0   6   4    1.05    0.40 
  -1  -6  -4   10.04    1.28 
   1   6   4    8.36    1.18 
   1   6   4    9.73    1.01 
  -2  -6  -4   37.53    1.99 
   2   6   4   37.52    1.72 
   2   6   4   39.03    2.21 
  -3  -6  -4    5.97    1.00 
  -3  -6  -4    4.61    0.53 
   3   6   4    2.85    0.78 
  -4  -6  -4    2.55    0.66 
  -4  -6  -4    2.71    0.23 
  -4  -6  -4    2.48    0.35 
   4   6   4    3.37    0.88 
  -5  -6  -4    0.88    0.10 
  -5  -6  -4    0.85    0.42 
   5   6   4    1.04    0.51 
  -6  -6  -4    6.65    1.22 
   6   6   4    6.13    1.21 
  -7  -6  -4    4.33    1.08 
   7   6   4    3.20    0.81 
  -8  -6  -4    1.44    0.64 
   8   6   4    1.73    0.59 
  -9  -6  -4    0.62    0.40 
   9   6   4    0.61    0.35 
 -10  -6  -4    0.68    0.44 
   5  -7  -4    0.87    0.42 
  -5   7   4    0.20    0.41 
  -5   7   4    2.79    0.88 
   4  -7  -4    9.06    1.54 
  -4   7   4    9.74    1.84 
   3  -7  -4    7.32    1.35 
  -3   7   4    5.73    1.37 
   2  -7  -4    0.26    0.24 
  -2   7   4    0.42    0.42 
  -2   7   4   -0.25    0.15 
   1  -7  -4    2.13    0.57 
  -1   7   4    0.64    0.35 
  -1   7   4    0.65    0.50 
   0  -7  -4    6.25    1.08 
   0   7   4    2.62    0.67 
   0   7   4    4.70    0.99 
  -1  -7  -4    0.83    0.38 
   1   7   4    0.20    0.24 
   1   7   4    1.43    0.48 
  -2  -7  -4   35.94    1.97 
   2   7   4   36.83    2.26 
   2   7   4   34.44    1.74 
  -3  -7  -4    7.91    1.12 
   3   7   4    6.29    0.58 
   3   7   4    6.50    1.13 
  -4  -7  -4    9.05    1.26 
  -4  -7  -4    8.88    0.42 
   4   7   4    7.42    1.34 
  -5  -7  -4   -0.02    0.25 
   5   7   4    0.42    0.36 
  -6  -7  -4    8.08    1.37 
   6   7   4    7.92    1.46 
   7   7   4    0.45    0.31 
  -8  -7  -4   30.31    2.41 
   8   7   4   35.40    2.56 
  -9  -7  -4    0.65    0.40 
   9   7   4    0.80    0.33 
 -10  -7  -4    0.54    0.32 
   5  -8  -4    0.89    0.33 
   4  -8  -4    0.44    0.33 
  -4   8   4    1.17    0.43 
   3  -8  -4   -0.60    0.24 
  -3   8   4    0.39    0.38 
   2  -8  -4   -0.55    0.24 
  -2   8   4   -0.21    0.27 
   1  -8  -4    1.97    0.55 
  -1   8   4    3.72    0.78 
  -1   8   4    2.04    0.61 
   0  -8  -4   -0.31    0.19 
   0   8   4   -0.25    0.25 
   0   8   4   -0.22    0.19 
  -1  -8  -4    9.50    1.32 
   1   8   4    8.00    1.33 
   1   8   4    9.19    1.28 
  -2  -8  -4   12.44    1.19 
   2   8   4   13.61    1.10 
   2   8   4   15.91    1.52 
  -3  -8  -4    0.16    0.24 
   3   8   4    0.42    0.35 
  -4  -8  -4   12.66    1.22 
   4   8   4   13.54    1.83 
  -5  -8  -4    6.58    1.17 
   5   8   4    6.28    1.26 
  -6  -8  -4    2.24    0.63 
   6   8   4    0.58    0.60 
  -7  -8  -4   44.56    2.77 
   7   8   4   45.38    3.05 
  -8  -8  -4    0.63    0.38 
   8   8   4    0.32    0.33 
  -9  -8  -4   18.32    2.51 
   9   8   4   19.35    2.44 
  -4   9   4    3.90    1.05 
  -3   9   4    0.37    0.41 
   2  -9  -4   -0.35    0.22 
  -2   9   4    0.10    0.33 
  -1   9   4    2.09    0.55 
  -1   9   4    1.74    0.49 
   0  -9  -4    1.35    0.46 
   0   9   4    2.42    0.61 
   0   9   4    0.98    0.51 
  -1  -9  -4    2.94    0.65 
   1   9   4    2.08    0.67 
   1   9   4    2.92    0.69 
  -2  -9  -4    1.04    0.39 
   2   9   4    0.80    0.37 
  -3  -9  -4   -0.26    0.18 
   3   9   4    0.28    0.27 
  -4  -9  -4   18.31    1.48 
   4   9   4   15.84    2.14 
  -5  -9  -4    1.17    0.35 
   5   9   4    1.00    0.52 
  -6  -9  -4    1.08    0.36 
   6   9   4    0.20    0.33 
  -7  -9  -4    6.76    1.29 
   7   9   4    5.85    1.38 
  -8  -9  -4   11.89    1.82 
   8   9   4   15.76    2.32 
  -9  -9  -4   -0.19    0.38 
   9   9   4    1.36    0.44 
  -3  10   4    1.02    0.44 
  -2  10   4    2.32    0.55 
  -1  10   4    5.91    1.11 
  -1  10   4    8.69    1.55 
   0  10   4   48.40    2.89 
   0  10   4   46.57    2.78 
   1  10   4    3.96    0.85 
   2  10   4    5.72    1.21 
   3  10   4    0.85    0.32 
   4  10   4   13.69    1.98 
   5  10   4   32.92    2.64 
   6  10   4    0.46    0.36 
   7  10   4   11.27    1.88 
   8  10   4    3.16    0.91 
   0  11   4    0.03    0.40 
   1  11   4    1.58    0.45 
   2  11   4    0.52    0.47 
   3  11   4    5.74    1.21 
   4  11   4    1.81    0.81 
   5  11   4    2.01    0.94 
   6  11   4    4.51    1.31 
   7  11   4    5.07    1.26 
   1  12   4   -0.05    0.37 
   2  12   4    0.34    0.37 
   3  12   4    1.98    0.65 
   4  12   4    2.58    0.78 
   5  12   4    7.17    1.76 
   6  12   4   -1.04    0.30 
   3  12  -5    0.81    0.68 
   2  12  -5   -0.40    0.47 
   1  12  -5    0.54    0.37 
   0  12  -5   -0.66    0.35 
  -1  12  -5    0.09    0.41 
   5  11  -5    3.24    0.98 
   4  11  -5    2.38    0.80 
   3  11  -5   -0.14    0.25 
   2  11  -5   -0.31    0.33 
   1  11  -5    0.90    0.42 
   0  11  -5    2.39    0.50 
  -1  11  -5   -0.19    0.32 
  -2  11  -5    2.21    0.69 
  -2  11  -5    0.40    0.40 
  -3  11  -5   -0.25    0.52 
  -3  11  -5    0.57    0.40 
   6  10  -5    2.15    0.80 
   5  10  -5    0.58    0.40 
   4  10  -5    0.26    0.33 
   3  10  -5    2.80    0.88 
   2  10  -5   -0.29    0.35 
   1  10  -5    1.54    0.58 
   0  10  -5    0.82    0.30 
   0  10  -5    0.47    0.26 
  -1  10  -5    3.18    0.83 
  -1  10  -5    3.58    0.95 
  -2  10  -5    1.50    0.39 
  -2  10  -5   -0.10    0.32 
  -3  10  -5    0.04    0.38 
  -3  10  -5    0.48    0.30 
  -4  10  -5    2.53    0.55 
   7   9  -5    0.47    0.28 
   6   9  -5    0.46    0.30 
   5   9  -5    3.41    0.92 
   4   9  -5   11.70    1.86 
   3   9  -5    7.21    1.47 
   2   9  -5   -0.35    0.23 
   1   9  -5    4.66    1.14 
   1   9  -5    3.51    0.83 
   0   9  -5    4.93    1.01 
   0   9  -5    4.04    0.90 
  -1   9  -5   11.02    1.67 
  -1   9  -5   15.75    2.03 
  -2   9  -5    9.12    1.42 
  -2   9  -5   11.89    1.86 
  -3   9  -5    0.97    0.32 
  -3   9  -5   -0.11    0.34 
  -4   9  -5    3.42    0.78 
  -4   9  -5    5.71    1.25 
  -5   9  -5    1.20    0.52 
   7   8  -5    0.46    0.31 
   6   8  -5   -0.08    0.25 
   5   8  -5    7.15    1.46 
   4   8  -5    1.85    0.63 
   3   8  -5    4.51    1.09 
   2   8  -5    1.37    0.49 
   2   8  -5    1.54    0.59 
   1   8  -5   17.31    1.69 
   1   8  -5   17.43    1.42 
   0   8  -5    7.68    1.27 
   0   8  -5   10.22    1.54 
  -1   8  -5    0.24    0.41 
  -1   8  -5    1.89    0.58 
  -2   8  -5    1.11    0.53 
  -2   8  -5    1.75    0.53 
  -3   8  -5    1.21    0.57 
  -3   8  -5    1.25    0.34 
  -4   8  -5   10.02    1.82 
  -4   8  -5    8.07    1.23 
  -5   8  -5   -0.90    0.39 
  -6   8  -5    4.43    1.23 
  -8  -7   5    3.69    0.41 
   7   7  -5    7.24    1.28 
  -7  -7   5    5.20    0.96 
   6   7  -5    0.43    0.27 
  -6  -7   5   -0.07    0.23 
   5   7  -5    3.57    0.95 
  -5  -7   5    3.31    0.85 
   4   7  -5    0.41    0.29 
   4   7  -5    0.36    0.22 
  -4  -7   5    0.54    0.22 
   3   7  -5   13.00    1.82 
   3   7  -5   11.58    1.02 
   3   7  -5   13.91    1.03 
  -3  -7   5   12.43    0.92 
   2   7  -5    0.13    0.31 
   2   7  -5    0.97    0.35 
   1   7  -5    3.62    0.76 
   1   7  -5    3.80    0.85 
   0   7  -5    1.20    0.44 
   0   7  -5    1.47    0.53 
  -1   7  -5   14.84    1.80 
  -1   7  -5   13.49    1.74 
  -2   7  -5   15.13    1.41 
  -2   7  -5   16.37    1.66 
  -3   7  -5   29.51    1.98 
  -3   7  -5   33.45    2.48 
  -4   7  -5    8.87    1.26 
  -4   7  -5    8.21    1.59 
  -5   7  -5   20.54    2.13 
  -6   7  -5    2.21    0.77 
  -7   7  -5    7.96    1.74 
  -8  -6   5   10.30    1.77 
  -7  -6   5    0.99    0.46 
   6   6  -5   17.18    1.60 
  -6  -6   5   16.37    1.60 
   5   6  -5   29.71    2.14 
   5   6  -5   27.52    1.66 
  -5  -6   5   27.11    2.01 
   4   6  -5   -0.21    0.21 
  -4  -6   5    0.18    0.18 
   3   6  -5    9.69    1.44 
   3   6  -5   12.89    1.10 
   3   6  -5   13.63    1.07 
  -3  -6   5   10.76    0.98 
   2   6  -5    9.22    1.19 
   2   6  -5    8.35    1.32 
   2   6  -5    8.95    0.74 
   1   6  -5   42.02    1.28 
   1   6  -5   41.05    2.41 
   1   6  -5   42.13    1.33 
   1   6  -5   43.72    2.16 
   0   6  -5    5.84    0.32 
   0   6  -5    6.04    1.09 
   0   6  -5    5.57    0.28 
   0   6  -5    5.56    1.03 
   0  -6   5    7.26    1.26 
  -1   6  -5   25.79    0.86 
  -1   6  -5   28.64    1.90 
  -1   6  -5   27.13    1.88 
   1  -6   5   25.45    1.86 
   1  -6   5   24.68    0.80 
  -2   6  -5    1.96    0.72 
  -2   6  -5    1.68    0.56 
  -2   6  -5    1.55    0.32 
   2  -6   5    2.02    0.65 
  -3   6  -5    7.69    1.39 
  -3   6  -5    6.18    0.85 
  -3   6  -5    7.48    1.16 
   3  -6   5    7.44    1.21 
  -4   6  -5    0.14    0.48 
  -4   6  -5    0.37    0.21 
  -4   6  -5    0.03    0.19 
   4  -6   5    0.04    0.19 
  -5   6  -5    3.59    0.79 
  -5   6  -5    3.30    0.64 
  -5   6  -5    3.56    1.15 
   5  -6   5    2.70    0.62 
  -6   6  -5   54.21    3.04 
  -6   6  -5   61.67    3.82 
  -7   6  -5    8.77    1.75 
  -8   6  -5    0.50    0.43 
  -8  -5   5    4.98    1.04 
  -7  -5   5   11.48    1.87 
   6   5  -5    3.52    0.81 
  -6  -5   5    3.77    0.91 
  -6  -5   5    5.16    1.05 
   5   5  -5   13.78    1.27 
   5   5  -5   14.78    1.44 
  -5  -5   5   14.60    1.49 
  -5  -5   5   15.96    1.37 
   4   5  -5    0.03    0.29 
   4   5  -5   -0.04    0.19 
  -4  -5   5    0.40    0.34 
   3   5  -5    0.07    0.27 
   3   5  -5    1.19    0.40 
  -3  -5   5    0.49    0.25 
   2   5  -5   11.04    1.40 
   2   5  -5   11.34    1.05 
   2   5  -5   11.08    0.90 
  -2  -5   5    8.86    1.24 
   1   5  -5    5.08    0.89 
   1   5  -5    3.85    0.35 
   1   5  -5    4.37    0.89 
   1   5  -5    4.38    0.58 
  -1  -5   5    3.10    0.78 
   0   5  -5   28.74    1.10 
   0   5  -5   30.17    1.82 
   0   5  -5   29.31    1.11 
   0  -5   5   29.32    1.89 
  -1   5  -5    0.59    0.22 
  -1   5  -5    0.62    0.49 
   1  -5   5    0.43    0.10 
   1  -5   5    0.72    0.43 
  -2   5  -5    3.24    0.53 
  -2   5  -5    3.18    0.82 
   2  -5   5    3.54    0.82 
  -3   5  -5   43.26    2.59 
  -3   5  -5   46.28    1.99 
   3  -5   5   46.09    2.34 
  -4   5  -5    1.89    0.52 
  -4   5  -5    2.13    0.82 
   4  -5   5    4.23    0.82 
  -5   5  -5   41.38    2.38 
  -5   5  -5   45.83    3.00 
   5  -5   5   41.58    2.13 
  -6   5  -5    0.84    0.49 
  -6   5  -5   -0.08    0.30 
  -7   5  -5    0.65    0.40 
  -7   5  -5    1.22    0.55 
  -8   5  -5    2.68    1.08 
  -8  -4   5   -0.62    0.46 
  -7  -4   5    0.41    0.38 
  -7  -4   5   -0.35    0.35 
   6   4  -5    5.40    0.94 
  -6  -4   5    5.81    1.07 
  -6  -4   5    4.94    1.09 
   5   4  -5   39.26    2.21 
  -5  -4   5   40.51    2.59 
  -5  -4   5   39.50    2.34 
   4   4  -5   28.77    1.86 
  -4  -4   5   26.07    1.90 
  -4  -4   5   24.75    1.72 
   3   4  -5    1.01    0.41 
   3   4  -5    0.53    0.29 
  -3  -4   5    0.37    0.35 
  -3  -4   5    1.01    0.44 
  -3  -4   5    0.74    0.30 
   2   4  -5    0.13    0.25 
   2   4  -5    0.12    0.28 
   2   4  -5    0.61    0.32 
  -2  -4   5    0.21    0.24 
  -2  -4   5    0.28    0.21 
   1   4  -5    2.84    0.54 
   1   4  -5    2.59    0.64 
  -1  -4   5    4.46    0.88 
   0   4  -5   21.90    1.55 
   0   4  -5   23.81    1.14 
   0   4  -5   23.58    1.08 
   0  -4   5   26.70    1.73 
  -1   4  -5    0.13    0.43 
  -1   4  -5    0.01    0.20 
   1  -4   5   -0.03    0.31 
   1  -4   5    0.07    0.06 
  -2   4  -5    0.02    0.45 
  -2   4  -5    0.16    0.22 
   2  -4   5    0.11    0.37 
  -3   4  -5   40.37    2.39 
  -3   4  -5   39.03    1.85 
   3  -4   5   39.17    2.11 
  -4   4  -5   70.86    3.42 
  -4   4  -5   72.52    2.91 
   4  -4   5   79.58    3.00 
  -5   4  -5    1.54    0.79 
  -5   4  -5    1.60    0.61 
   5  -4   5    1.21    0.43 
  -6   4  -5    0.11    0.23 
  -6   4  -5    0.25    0.40 
  -7   4  -5    0.60    0.46 
  -7   4  -5   -0.25    0.26 
  -8   4  -5   -0.59    0.37 
  -8   4  -5   -0.08    0.29 
  -9   4  -5    0.51    0.39 
  -9   4  -5    1.27    0.53 
  -8  -3   5    0.53    0.37 
  -8  -3   5   -0.38    0.52 
  -7  -3   5    0.68    0.33 
  -7  -3   5    0.53    0.43 
  -6  -3   5   23.83    1.94 
  -6  -3   5   23.58    2.15 
   5   3  -5   26.45    1.69 
  -5  -3   5   26.84    1.99 
  -5  -3   5   27.50    2.16 
   4   3  -5   26.66    1.67 
  -4  -3   5   24.30    1.76 
  -4  -3   5   26.05    1.95 
   3   3  -5    0.20    0.28 
  -3  -3   5    0.52    0.33 
  -3  -3   5   -0.15    0.22 
  -3  -3   5   -0.29    0.22 
   2   3  -5   12.91    1.07 
   2   3  -5   12.10    1.06 
  -2  -3   5   12.29    1.12 
  -2  -3   5   12.52    1.12 
  -2  -3   5   12.34    1.13 
   1   3  -5   11.66    0.99 
   1   3  -5   10.88    0.91 
  -1  -3   5   11.14    1.10 
   0   3  -5   11.78    1.14 
   0   3  -5   11.19    0.86 
   0  -3   5   11.83    1.12 
  -1   3  -5   63.21    2.03 
  -1   3  -5   63.05    2.61 
   1  -3   5   58.69    2.46 
  -2   3  -5   12.79    1.31 
  -2   3  -5   11.91    0.96 
   2  -3   5   13.46    1.18 
  -3   3  -5   -0.40    0.36 
  -3   3  -5   -0.09    0.27 
   3  -3   5   -0.06    0.27 
  -4   3  -5   34.50    2.25 
  -4   3  -5   33.49    1.93 
   4  -3   5   34.16    1.82 
  -5   3  -5    1.51    0.60 
  -5   3  -5    2.70    0.80 
   5  -3   5    2.36    0.58 
  -6   3  -5   34.10    2.50 
  -6   3  -5   29.63    2.19 
   6  -3   5   31.08    1.69 
  -7   3  -5   13.67    1.95 
  -7   3  -5   13.33    2.09 
  -8   3  -5   14.21    2.31 
  -8   3  -5   10.73    1.81 
  -9   3  -5    1.58    0.64 
  -9   3  -5    1.23    0.45 
  -8  -2   5    0.39    0.39 
  -8  -2   5    0.92    0.46 
  -7  -2   5    0.25    0.42 
  -7  -2   5    0.41    0.43 
  -6  -2   5    0.88    0.39 
  -6  -2   5    2.48    0.61 
   5   2  -5   47.23    2.12 
  -5  -2   5   49.16    3.00 
  -5  -2   5   46.86    2.75 
   4   2  -5    0.94    0.35 
  -4  -2   5    0.82    0.33 
  -4  -2   5    1.14    0.57 
  -4  -2   5    0.60    0.27 
  -3  -2   5   24.98    1.51 
  -3  -2   5   28.78    1.86 
  -3  -2   5   27.52    1.88 
   2   2  -5   46.09    2.18 
  -2  -2   5   49.13    2.35 
  -2  -2   5   50.18    2.35 
  -2  -2   5   48.14    2.14 
   1   2  -5    0.05    0.27 
   1   2  -5    0.48    0.37 
  -1  -2   5    0.40    0.31 
   0   2  -5   15.37    1.06 
   0   2  -5   14.85    1.19 
   0  -2   5   13.99    1.15 
  -1   2  -5    5.97    0.99 
  -1   2  -5    5.54    0.78 
   1  -2   5    5.36    0.87 
  -2   2  -5    5.75    0.99 
  -2   2  -5    6.16    0.85 
   2  -2   5    6.71    0.96 
  -3   2  -5    2.54    0.83 
  -3   2  -5    2.14    0.64 
   3  -2   5    2.52    0.65 
  -4   2  -5   12.70    1.62 
  -4   2  -5   12.56    1.25 
   4  -2   5   11.23    1.05 
  -5   2  -5    0.06    0.32 
  -5   2  -5    0.44    0.42 
   5  -2   5    0.41    0.33 
  -6   2  -5    7.65    1.40 
  -6   2  -5    8.21    1.47 
   6  -2   5    7.13    0.99 
  -7   2  -5   20.35    1.93 
  -7   2  -5   20.35    1.94 
  -8   2  -5    6.18    1.35 
  -8   2  -5    3.12    0.90 
  -9   2  -5    2.97    0.86 
  -9   2  -5    2.87    0.91 
  -8  -1   5    7.94    1.61 
  -8  -1   5    6.38    1.68 
  -7  -1   5   10.17    1.90 
  -7  -1   5   10.75    1.83 
  -6  -1   5    3.28    0.64 
  -6  -1   5    3.42    0.91 
   5   1  -5    0.44    0.14 
  -5  -1   5    0.68    0.35 
  -5  -1   5    0.39    0.42 
   4   1  -5    8.01    0.76 
  -4  -1   5    6.47    1.21 
  -4  -1   5    6.46    1.22 
  -4  -1   5    7.84    0.94 
  -3  -1   5    0.97    0.35 
  -3  -1   5    0.96    0.43 
  -3  -1   5    0.15    0.36 
   2   1  -5    0.25    0.38 
  -2  -1   5    0.20    0.30 
  -2  -1   5   -0.28    0.16 
  -2  -1   5    0.08    0.33 
   1   1  -5   92.15    2.99 
  -1  -1   5   87.28    2.78 
  -1  -1   5   91.57    3.15 
   0   1  -5  130.26    3.42 
   0   1  -5  129.98    3.41 
   0  -1   5  129.56    3.51 
  -1   1  -5   -0.18    0.29 
  -1   1  -5    0.22    0.39 
   1  -1   5    0.24    0.37 
  -2   1  -5   14.21    1.12 
  -2   1  -5   14.00    1.25 
   2  -1   5   13.40    1.17 
  -3   1  -5   96.62    3.12 
  -3   1  -5   93.75    3.25 
   3  -1   5   94.67    3.04 
  -4   1  -5   77.98    3.06 
  -4   1  -5   83.11    3.21 
   4  -1   5   83.52    2.86 
  -5   1  -5    1.11    0.57 
  -5   1  -5    0.56    0.41 
   5  -1   5    1.01    0.37 
  -6   1  -5   25.11    2.06 
  -6   1  -5   25.63    1.98 
   6  -1   5   26.63    1.60 
  -7   1  -5    3.49    0.88 
  -7   1  -5    2.95    0.88 
   7  -1   5    2.89    0.62 
  -8   1  -5   26.01    2.19 
  -8   1  -5   28.04    2.43 
  -9   1  -5    4.35    1.12 
  -9   1  -5    2.65    0.93 
 -10   1  -5    0.82    0.37 
 -10   1  -5    0.93    0.44 
  -8   0   5    0.46    0.54 
  -8   0   5   -0.54    0.42 
  -7   0   5    1.35    0.65 
  -7   0   5    0.97    0.43 
  -6   0   5    0.32    0.34 
  -6   0   5    0.48    0.32 
  -5   0   5   21.60    2.03 
  -5   0   5   27.52    2.13 
  -4   0   5    0.55    0.21 
  -4   0   5    1.26    0.49 
  -4   0   5    0.43    0.33 
  -3   0   5   36.80    2.32 
  -3   0   5   40.64    2.34 
  -3   0   5   40.63    1.70 
   2   0  -5   37.55    2.11 
  -2   0   5   37.58    2.15 
  -2   0   5   37.04    1.65 
  -2   0   5   36.83    2.14 
   1   0  -5   10.22    1.05 
  -1   0   5   10.47    0.92 
  -1   0   5   10.64    1.34 
   0   0  -5   16.02    1.16 
   0   0  -5   15.93    1.20 
   0   0   5   16.31    1.33 
   0   0   5   15.77    1.16 
  -1   0  -5   55.20    2.14 
   1   0   5   54.06    2.14 
  -2   0  -5    6.18    0.92 
  -2   0  -5    5.36    0.83 
   2   0   5    5.79    0.89 
  -3   0  -5   97.01    3.20 
  -3   0  -5   96.44    3.13 
   3   0   5   95.74    3.05 
  -4   0  -5   25.86    1.72 
  -4   0  -5   28.13    1.88 
   4   0   5   26.75    1.60 
  -5   0  -5   -0.06    0.33 
  -5   0  -5    0.07    0.39 
   5   0   5    0.17    0.29 
  -6   0  -5   16.35    1.51 
  -6   0  -5   16.36    1.61 
   6   0   5   12.86    1.13 
  -7   0  -5    3.22    0.89 
  -7   0  -5    2.23    0.77 
   7   0   5    2.96    0.66 
  -8   0  -5   10.03    1.62 
  -8   0  -5    7.63    1.60 
  -9   0  -5    1.53    0.81 
  -9   0  -5    2.30    0.55 
 -10   0  -5   12.73    2.21 
 -10   0  -5   12.52    2.04 
  -8   1   5   -0.94    0.34 
  -8   1   5   -0.02    0.49 
  -7   1   5   -0.36    0.35 
  -7   1   5    0.30    0.56 
  -6   1   5   10.11    1.89 
  -6   1   5    9.10    1.62 
  -5   1   5   34.38    2.69 
  -5   1   5   37.41    2.62 
  -4   1   5    6.42    1.27 
  -4   1   5    6.65    0.55 
  -4   1   5    7.49    1.34 
  -3   1   5   20.04    1.75 
  -3   1   5   19.70    1.69 
  -3   1   5   20.50    1.11 
   2  -1  -5   25.36    1.78 
  -2   1   5   25.44    1.85 
  -2   1   5   24.19    1.76 
  -2   1   5   24.20    1.28 
   1  -1  -5   48.69    2.30 
  -1   1   5   50.54    1.96 
  -1   1   5   47.22    2.33 
   0  -1  -5   72.60    2.63 
   0   1   5   73.07    2.75 
   0   1   5   72.97    2.47 
  -1  -1  -5    0.42    0.32 
  -1  -1  -5   -0.08    0.33 
   1   1   5    0.45    0.35 
  -2  -1  -5  153.94    4.02 
  -2  -1  -5  150.19    3.76 
   2   1   5  150.04    3.92 
  -3  -1  -5  196.90    4.56 
  -3  -1  -5  193.58    4.79 
   3   1   5  199.96    4.75 
  -4  -1  -5    3.37    0.78 
  -4  -1  -5    2.92    0.80 
   4   1   5    2.28    0.63 
  -5  -1  -5   22.55    1.59 
  -5  -1  -5   21.05    1.71 
   5   1   5   21.50    1.51 
  -6  -1  -5   26.70    2.06 
  -6  -1  -5   27.58    1.85 
   6   1   5   25.14    1.66 
  -7  -1  -5   10.45    1.70 
  -7  -1  -5   10.29    1.50 
   7   1   5   11.07    1.06 
  -8  -1  -5   25.46    2.37 
  -8  -1  -5   28.34    2.13 
  -9  -1  -5    4.05    0.82 
  -9  -1  -5    3.58    1.07 
 -10  -1  -5    1.52    0.39 
 -10  -1  -5    1.37    0.46 
  -7   2   5    8.41    1.82 
  -7   2   5    8.05    1.83 
  -6   2   5    7.81    1.67 
  -6   2   5    6.25    1.44 
  -5   2   5   40.00    2.83 
  -5   2   5   40.56    2.96 
  -4   2   5   22.96    2.00 
  -4   2   5   19.97    1.94 
   3  -2  -5    0.31    0.34 
  -3   2   5    0.59    0.17 
  -3   2   5    0.18    0.28 
  -3   2   5   -0.37    0.25 
   2  -2  -5    0.63    0.38 
  -2   2   5    0.43    0.22 
  -2   2   5   -0.45    0.29 
  -2   2   5    0.47    0.45 
   1  -2  -5   23.22    1.67 
  -1   2   5   22.72    1.29 
  -1   2   5   21.89    1.67 
   0  -2  -5    0.15    0.37 
   0   2   5    0.24    0.33 
   0   2   5   -0.35    0.34 
  -1  -2  -5    3.36    0.73 
   1   2   5    3.73    0.68 
   1   2   5    4.67    0.84 
  -2  -2  -5   19.66    1.16 
  -2  -2  -5   21.60    1.46 
   2   2   5   21.52    1.43 
  -3  -2  -5    6.22    0.91 
  -3  -2  -5    6.49    1.01 
   3   2   5    6.01    0.96 
  -4  -2  -5   65.51    2.41 
  -4  -2  -5   62.15    2.74 
   4   2   5   62.67    2.60 
  -5  -2  -5   64.91    3.04 
  -5  -2  -5   63.41    2.56 
   5   2   5   66.25    2.74 
  -6  -2  -5   23.16    1.60 
  -6  -2  -5   22.35    1.89 
   6   2   5   23.55    1.65 
  -7  -2  -5    4.88    1.01 
  -7  -2  -5    5.27    1.18 
   7   2   5    5.82    1.01 
  -8  -2  -5   47.61    2.69 
  -8  -2  -5   46.69    3.19 
   8   2   5   44.61    2.39 
  -9  -2  -5    1.78    0.74 
  -9  -2  -5    3.78    0.74 
 -10  -2  -5    1.45    0.56 
 -10  -2  -5    1.01    0.34 
  -7   3   5    0.25    0.43 
  -7   3   5    0.39    0.54 
  -6   3   5    1.25    0.77 
  -6   3   5   -0.17    0.29 
  -5   3   5   42.63    3.03 
  -5   3   5   42.83    3.09 
  -4   3   5    1.62    0.65 
  -4   3   5    2.33    0.86 
   3  -3  -5    7.09    1.29 
  -3   3   5    6.05    0.56 
  -3   3   5    7.11    1.35 
  -3   3   5    5.85    1.24 
   2  -3  -5    1.79    0.59 
  -2   3   5    2.29    0.47 
  -2   3   5    1.97    0.71 
   1  -3  -5    0.06    0.19 
  -1   3   5    0.26    0.33 
  -1   3   5    0.15    0.22 
   0  -3  -5   36.43    1.99 
   0   3   5   33.28    1.70 
   0   3   5   35.54    2.01 
  -1  -3  -5    0.19    0.36 
   1   3   5    0.30    0.42 
   1   3   5   -0.38    0.24 
  -2  -3  -5   -0.01    0.34 
  -2  -3  -5    0.09    0.23 
   2   3   5    0.23    0.42 
  -3  -3  -5   28.20    1.45 
  -3  -3  -5   30.70    1.86 
   3   3   5   28.25    1.76 
  -4  -3  -5    5.77    1.08 
  -4  -3  -5    5.01    0.81 
   4   3   5    5.31    0.93 
  -5  -3  -5   14.69    1.12 
  -5  -3  -5   13.99    1.43 
   5   3   5   16.29    1.41 
  -6  -3  -5   43.47    2.08 
  -6  -3  -5   40.31    2.52 
   6   3   5   39.53    2.26 
  -7  -3  -5   17.81    1.42 
  -7  -3  -5   19.51    1.86 
   7   3   5   19.80    1.63 
  -8  -3  -5   45.38    2.47 
  -8  -3  -5   43.16    3.01 
   8   3   5   43.74    2.47 
  -9  -3  -5    1.79    0.68 
  -9  -3  -5    1.76    0.39 
 -10  -3  -5    6.78    1.53 
  -7   4   5    1.80    0.52 
  -7   4   5   -0.75    0.39 
  -6   4   5   10.60    1.93 
  -6   4   5   11.99    2.12 
  -5   4   5    8.59    1.69 
  -5   4   5    8.85    1.69 
   4  -4  -5   96.82    4.34 
  -4   4   5   94.08    4.51 
  -4   4   5   97.78    4.64 
   3  -4  -5   36.53    2.43 
  -3   4   5   34.66    2.54 
  -3   4   5   37.18    2.60 
  -3   4   5   35.93    1.50 
   2  -4  -5    6.24    1.18 
  -2   4   5    6.49    1.27 
  -2   4   5    6.63    0.88 
   1  -4  -5   31.47    1.97 
  -1   4   5   31.78    2.08 
  -1   4   5   29.15    1.57 
   0   4   5    0.71    0.47 
   0   4   5    0.54    0.36 
  -1  -4  -5    2.56    0.69 
   1   4   5    2.98    0.73 
   1   4   5    3.01    0.73 
  -2  -4  -5   14.04    1.30 
   2   4   5   11.78    1.16 
   2   4   5   14.65    1.15 
  -3  -4  -5    3.92    0.92 
   3   4   5    3.48    0.77 
  -4  -4  -5   11.13    0.89 
  -4  -4  -5   10.57    1.45 
   4   4   5   11.04    1.38 
  -5  -4  -5   -0.14    0.29 
  -5  -4  -5    0.30    0.23 
   5   4   5    0.50    0.37 
  -6  -4  -5   23.57    1.92 
  -6  -4  -5   21.07    1.32 
   6   4   5   21.22    1.72 
  -7  -4  -5   71.57    3.63 
  -7  -4  -5   67.59    2.67 
   7   4   5   68.57    3.19 
  -8  -4  -5    6.17    1.02 
  -8  -4  -5    4.59    1.16 
   8   4   5    4.66    1.00 
  -9  -4  -5    1.10    0.54 
   9   4   5    0.12    0.25 
 -10  -4  -5   -0.53    0.34 
   6  -5  -5    5.79    1.40 
  -6   5   5    4.90    1.09 
  -6   5   5    6.87    1.53 
   5  -5  -5    2.59    0.70 
  -5   5   5    2.40    0.60 
  -5   5   5    0.95    0.45 
   4  -5  -5   68.77    3.71 
  -4   5   5   74.32    4.06 
  -4   5   5   76.65    4.18 
   3  -5  -5   10.14    1.57 
  -3   5   5    8.53    1.68 
   2  -5  -5    6.77    1.20 
  -2   5   5    6.22    0.86 
  -2   5   5    8.02    1.45 
   1  -5  -5    6.55    1.13 
  -1   5   5    6.23    1.23 
  -1   5   5    6.17    0.95 
   0  -5  -5   19.70    1.52 
   0   5   5   17.96    1.37 
   0   5   5   18.62    1.55 
  -1  -5  -5   -0.05    0.24 
   1   5   5    0.33    0.35 
   1   5   5    0.15    0.29 
  -2  -5  -5   38.75    2.14 
   2   5   5   41.19    2.25 
   2   5   5   38.82    1.86 
  -3  -5  -5   17.31    1.01 
  -3  -5  -5   17.62    1.46 
   3   5   5   16.83    1.50 
  -4  -5  -5   19.03    1.04 
  -4  -5  -5   18.00    1.53 
   4   5   5   16.70    1.55 
  -5  -5  -5    0.42    0.39 
  -5  -5  -5    0.41    0.20 
   5   5   5   -0.22    0.26 
  -6  -5  -5   28.76    2.16 
  -6  -5  -5   33.60    1.50 
   6   5   5   34.76    2.28 
  -7  -5  -5   30.71    2.37 
  -7  -5  -5   29.73    1.53 
   7   5   5   31.86    2.23 
  -8  -5  -5   11.14    1.77 
   8   5   5    9.30    1.45 
  -9  -5  -5    8.95    1.62 
   9   5   5   10.39    1.58 
 -10  -5  -5   -0.34    0.38 
   5  -6  -5   -0.33    0.34 
  -5   6   5    0.06    0.30 
  -5   6   5    0.98    0.48 
   4  -6  -5   15.47    2.14 
  -4   6   5   13.89    2.25 
   3  -6  -5   15.83    1.60 
  -3   6   5   17.82    2.49 
   2  -6  -5    3.68    0.94 
  -2   6   5    3.07    0.63 
  -2   6   5    1.72    0.67 
   1  -6  -5    1.31    0.55 
  -1   6   5    1.39    0.41 
  -1   6   5    1.66    0.61 
   0  -6  -5    8.12    1.29 
   0   6   5    7.37    1.09 
   0   6   5    6.54    1.21 
  -1  -6  -5   11.56    1.16 
   1   6   5   11.19    1.46 
   1   6   5    8.83    1.23 
  -2  -6  -5   26.45    1.78 
   2   6   5   27.29    1.87 
   2   6   5   25.01    1.53 
  -3  -6  -5    1.22    0.50 
  -3  -6  -5    1.25    0.33 
   3   6   5    1.09    0.45 
  -4  -6  -5   28.27    1.24 
  -4  -6  -5   31.61    2.01 
   4   6   5   30.78    2.13 
  -5  -6  -5    1.51    0.57 
  -5  -6  -5    0.92    0.24 
   5   6   5    1.10    0.57 
  -6  -6  -5   11.33    1.66 
   6   6   5   10.62    1.63 
  -7  -6  -5    0.69    0.40 
   7   6   5    0.11    0.30 
  -8  -6  -5   48.42    3.16 
   8   6   5   50.04    3.00 
  -9  -6  -5    0.46    0.36 
   9   6   5   -0.30    0.25 
 -10  -6  -5    1.97    0.99 
   5  -7  -5    2.44    0.58 
  -5   7   5    1.15    0.47 
   4  -7  -5    3.72    1.00 
  -4   7   5    1.57    0.51 
   3  -7  -5    0.80    0.39 
  -3   7   5   -0.40    0.27 
   2  -7  -5    2.35    0.66 
  -2   7   5    0.73    0.24 
  -2   7   5    1.08    0.55 
   1  -7  -5   10.96    1.56 
  -1   7   5   11.21    1.76 
  -1   7   5   10.54    1.35 
   0  -7  -5    0.40    0.37 
   0   7   5    1.07    0.42 
   0   7   5    1.56    0.54 
  -1  -7  -5    5.50    0.99 
   1   7   5    5.04    0.95 
   1   7   5    5.40    1.06 
  -2  -7  -5   10.58    1.40 
   2   7   5   11.05    1.56 
   2   7   5   11.95    1.09 
  -3  -7  -5   14.06    0.94 
  -3  -7  -5   15.26    1.40 
   3   7   5   13.39    1.77 
   3   7   5   13.34    1.00 
  -4  -7  -5    2.61    0.70 
   4   7   5    2.04    0.62 
  -5  -7  -5   22.44    1.85 
   5   7   5   19.55    1.84 
  -6  -7  -5   -0.45    0.24 
   6   7   5    0.41    0.36 
  -7  -7  -5   12.17    1.80 
   7   7   5   10.25    1.74 
  -8  -7  -5    0.54    0.27 
   8   7   5   -0.07    0.29 
  -9  -7  -5   -0.48    0.29 
   9   7   5    0.11    0.32 
 -10  -7  -5    1.94    0.80 
  10   7   5    1.39    0.33 
   4  -8  -5    0.92    0.45 
  -4   8   5   -0.20    0.40 
   3  -8  -5    0.24    0.29 
  -3   8   5   -0.16    0.34 
   2  -8  -5   10.62    1.63 
  -2   8   5    6.49    1.50 
   1  -8  -5    5.93    1.12 
  -1   8   5    6.71    1.03 
  -1   8   5    4.99    1.16 
   0  -8  -5    2.80    0.70 
   0   8   5    2.65    0.68 
   0   8   5    2.51    0.68 
  -1  -8  -5    0.62    0.28 
   1   8   5    0.52    0.39 
   1   8   5    1.18    0.50 
  -2  -8  -5    1.07    0.42 
   2   8   5    2.31    0.65 
   2   8   5    0.57    0.31 
   3   8   5    1.84    0.57 
  -4  -8  -5    0.83    0.34 
   4   8   5    1.31    0.56 
  -5  -8  -5    1.87    0.66 
   5   8   5    1.80    0.64 
  -6  -8  -5    3.04    0.83 
   6   8   5    2.12    0.84 
  -7  -8  -5    2.53    0.77 
   7   8   5    4.24    1.10 
  -8  -8  -5    6.80    1.35 
   8   8   5    8.22    1.55 
  -9  -8  -5   -0.56    0.37 
   9   8   5    0.33    0.27 
   3  -9  -5   -0.45    0.30 
  -3   9   5    0.88    0.48 
   2  -9  -5    3.90    0.63 
  -2   9   5    6.81    1.50 
   1  -9  -5    1.25    0.51 
  -1   9   5    1.40    0.26 
  -1   9   5    1.71    0.56 
   0  -9  -5    4.81    0.97 
   0   9   5    2.73    0.78 
   0   9   5    5.06    1.07 
  -1  -9  -5    0.60    0.44 
   1   9   5   -0.25    0.29 
   1   9   5    0.83    0.36 
  -2  -9  -5    4.75    0.91 
   2   9   5    4.08    0.96 
  -3  -9  -5    5.49    1.03 
   3   9   5    4.22    0.94 
  -4  -9  -5   14.13    1.77 
   4   9   5   15.04    2.13 
  -5  -9  -5    2.11    0.65 
   5   9   5    1.68    0.64 
  -6  -9  -5    4.98    1.08 
   6   9   5    6.55    1.41 
  -7  -9  -5   -0.11    0.28 
   7   9   5    0.90    0.49 
  -8  -9  -5    9.61    1.64 
   8   9   5    4.88    1.15 
  -9  -9  -5    0.39    0.33 
   9   9   5   -0.25    0.29 
  -2  10   5   -0.47    0.39 
  -1  10   5   18.04    1.86 
   0  10   5    1.63    0.53 
   0  10   5    4.26    0.93 
   1  10   5    5.70    1.10 
   2  10   5   -0.17    0.30 
   3  10   5    1.09    0.45 
   4  10   5    0.85    0.38 
  -5 -10  -5    2.15    0.51 
   5  10   5    2.02    0.65 
  -6 -10  -5    7.38    1.18 
   6  10   5    6.55    1.30 
  -7 -10  -5    9.64    1.42 
   7  10   5   10.11    1.91 
  -8 -10  -5    7.36    1.14 
   8  10   5    7.10    1.63 
   0  11   5    2.23    0.56 
   1  11   5    1.43    0.50 
   2  11   5    7.62    1.52 
   3  11   5    1.18    0.67 
   4  11   5    5.84    1.40 
   5  11   5    1.01    0.54 
   6  11   5    6.07    1.41 
   7  11   5    3.50    1.01 
   1  12   5   -0.36    0.37 
   2  12   5    0.38    0.38 
   3  12   5    2.59    0.88 
   4  12   5    2.48    0.88 
   5  12   5    2.40    1.05 
   6  12   5    0.99    0.67 
   2  12  -6   -0.07    0.31 
   1  12  -6   -0.07    0.38 
   0  12  -6    0.37    0.66 
   4  11  -6   -0.06    0.32 
   3  11  -6    2.73    0.84 
   2  11  -6    2.11    0.70 
   1  11  -6    1.28    0.64 
   0  11  -6    1.64    0.54 
  -1  11  -6    1.12    0.64 
  -2  11  -6   -0.18    0.34 
  -2  11  -6    0.38    0.37 
  -3  11  -6   -0.38    0.35 
   5  10  -6    1.71    0.51 
   4  10  -6    0.95    0.56 
   3  10  -6    2.01    0.65 
   2  10  -6   10.92    1.84 
   1  10  -6   14.40    2.07 
   0  10  -6    0.54    0.37 
  -1  10  -6    2.70    0.77 
  -1  10  -6    3.60    1.08 
  -2  10  -6    3.87    1.00 
  -2  10  -6    0.95    0.57 
  -3  10  -6    5.09    1.13 
  -3  10  -6    2.26    0.69 
  -4  10  -6    1.02    0.41 
   6   9  -6    4.63    1.04 
   5   9  -6   22.66    2.13 
   4   9  -6   10.77    1.81 
   3   9  -6    3.01    0.82 
   2   9  -6    5.61    1.25 
   1   9  -6    3.26    0.75 
   1   9  -6    3.77    0.95 
   0   9  -6    4.92    1.13 
   0   9  -6    3.57    0.89 
  -1   9  -6    3.88    0.97 
  -1   9  -6    4.47    0.92 
  -2   9  -6    5.35    1.07 
  -2   9  -6    4.68    1.10 
  -3   9  -6    9.52    1.41 
  -3   9  -6    6.68    1.33 
  -4   9  -6    0.16    0.52 
  -4   9  -6    0.84    0.30 
  -5   9  -6    0.05    0.40 
   7   8  -6    0.57    0.32 
   6   8  -6   12.01    1.82 
   5   8  -6    1.66    0.53 
   4   8  -6   25.66    2.23 
   3   8  -6    0.48    0.42 
   2   8  -6    4.51    1.06 
   2   8  -6    4.73    0.88 
   1   8  -6    0.08    0.24 
   1   8  -6   -0.11    0.23 
   0   8  -6    0.59    0.32 
   0   8  -6    0.55    0.37 
  -1   8  -6   21.82    1.87 
  -1   8  -6   23.31    1.96 
  -2   8  -6   11.96    1.76 
  -2   8  -6   10.39    1.51 
  -3   8  -6    5.69    1.03 
  -3   8  -6    9.95    1.76 
  -4   8  -6    1.38    0.41 
  -4   8  -6    1.24    0.52 
  -5   8  -6    2.98    0.79 
  -6   8  -6    2.18    0.64 
   6   7  -6   14.18    1.94 
  -6  -7   6   14.09    1.36 
   5   7  -6    0.72    0.36 
  -5  -7   6    0.33    0.21 
   4   7  -6    1.59    0.60 
  -4  -7   6    1.63    0.39 
   3   7  -6   -0.13    0.25 
   3   7  -6    0.48    0.28 
   2   7  -6    0.47    0.35 
   2   7  -6    1.04    0.45 
   1   7  -6    0.78    0.43 
   1   7  -6   -0.20    0.24 
   0   7  -6    2.71    0.77 
   0   7  -6    2.94    0.78 
   0  -7   6    1.49    0.60 
  -1   7  -6    6.88    1.24 
  -1   7  -6    9.46    1.51 
   1  -7   6    8.66    1.44 
  -2   7  -6    0.09    0.53 
  -2   7  -6    0.67    0.34 
   2  -7   6    0.70    0.40 
  -3   7  -6   26.31    2.24 
  -3   7  -6   23.32    1.86 
   3  -7   6   27.83    2.04 
  -4   7  -6   24.46    1.82 
  -4   7  -6   22.58    2.14 
   4  -7   6   24.83    1.88 
  -5   7  -6    0.56    0.34 
  -5   7  -6   -0.11    0.27 
  -6   7  -6   -0.18    0.33 
  -7   7  -6   20.24    2.86 
  -7  -6   6    0.15    0.32 
   6   6  -6    1.35    0.35 
  -6  -6   6    0.60    0.33 
   5   6  -6    1.38    0.55 
   5   6  -6    1.47    0.45 
  -5  -6   6    0.75    0.40 
   4   6  -6    0.07    0.19 
  -4  -6   6   -0.44    0.20 
   3   6  -6    0.08    0.21 
   3   6  -6    0.41    0.22 
   3   6  -6    0.33    0.26 
   2   6  -6    5.85    1.18 
   2   6  -6    5.43    0.98 
   2   6  -6    4.99    0.76 
   1   6  -6   13.92    1.75 
   1   6  -6   12.64    0.84 
   1   6  -6   14.52    1.31 
  -1  -6   6   12.79    1.63 
   0   6  -6    0.62    0.31 
   0   6  -6   -0.05    0.08 
   0   6  -6    0.12    0.29 
   0  -6   6    0.05    0.25 
  -1   6  -6    0.06    0.09 
  -1   6  -6    0.40    0.40 
   1  -6   6    0.15    0.26 
  -2   6  -6   12.91    1.76 
  -2   6  -6   14.71    0.90 
   2  -6   6   14.92    1.44 
  -3   6  -6    0.58    0.48 
  -3   6  -6    0.21    0.18 
   3  -6   6    0.31    0.33 
  -4   6  -6    5.91    1.31 
  -4   6  -6    6.45    0.97 
   4  -6   6    7.27    1.19 
  -5   6  -6    5.02    0.95 
  -5   6  -6    5.06    0.84 
  -5   6  -6    8.00    1.67 
   5  -6   6    4.36    0.89 
  -6   6  -6   32.75    2.78 
  -7   6  -6   58.59    3.89 
  -8   6  -6    4.62    1.09 
  -8  -5   6    0.48    0.39 
  -7  -5   6    3.75    0.97 
   6   5  -6    9.64    1.48 
  -6  -5   6    7.66    1.25 
  -6  -5   6   10.65    1.76 
   5   5  -6  130.92    4.67 
   5   5  -6  123.18    4.17 
  -5  -5   6  128.53    4.91 
  -5  -5   6  126.61    4.54 
   4   5  -6   29.06    2.05 
   4   5  -6   27.41    1.75 
  -4  -5   6   27.92    1.95 
   3   5  -6   14.48    1.41 
   3   5  -6   13.49    1.22 
   3   5  -6   15.79    1.26 
  -3  -5   6   14.89    1.30 
   2   5  -6   45.37    2.50 
   2   5  -6   44.63    2.02 
   2   5  -6   45.97    2.31 
  -2  -5   6   46.33    2.55 
   1   5  -6    0.46    0.33 
   1   5  -6   -0.16    0.10 
  -1  -5   6   -0.07    0.22 
   0   5  -6    0.53    0.21 
   0   5  -6    1.07    0.49 
   0  -5   6    0.69    0.40 
  -1   5  -6    3.00    0.81 
  -1   5  -6    3.14    0.53 
   1  -5   6    3.91    0.88 
  -2   5  -6    8.02    0.74 
  -2   5  -6    8.02    1.40 
   2  -5   6    7.07    1.18 
  -3   5  -6    1.14    0.41 
  -3   5  -6    1.68    0.71 
   3  -5   6    1.18    0.49 
  -4   5  -6   11.74    1.12 
  -4   5  -6   13.75    1.95 
   4  -5   6   12.71    1.57 
  -5   5  -6   26.11    2.29 
  -5   5  -6   26.88    1.88 
   5  -5   6   27.13    1.80 
  -6   5  -6   29.77    2.54 
  -6   5  -6   28.83    2.13 
  -7   5  -6   -0.26    0.30 
  -7   5  -6    0.21    0.53 
  -8   5  -6    6.84    1.76 
  -8   5  -6    5.92    1.13 
  -8  -4   6    0.18    0.42 
  -7  -4   6    0.32    0.41 
  -7  -4   6    0.28    0.34 
  -6  -4   6    6.45    1.36 
   5   4  -6   55.11    2.74 
  -5  -4   6   53.33    3.13 
  -5  -4   6   54.55    2.93 
   4   4  -6    0.50    0.34 
  -4  -4   6    1.00    0.57 
  -4  -4   6    1.77    0.57 
   3   4  -6   13.12    1.27 
   3   4  -6   14.90    1.24 
   3   4  -6   15.39    1.34 
  -3  -4   6   14.92    1.33 
  -3  -4   6   14.30    1.34 
   2   4  -6   21.03    1.43 
   2   4  -6   21.54    1.46 
  -2  -4   6   22.29    1.66 
   1   4  -6    4.09    0.69 
   1   4  -6    4.33    0.87 
  -1  -4   6    4.77    0.93 
   0   4  -6   16.21    1.38 
   0   4  -6   15.36    1.03 
   0  -4   6   15.69    1.41 
  -1   4  -6   17.23    1.08 
  -1   4  -6   18.26    1.54 
   1  -4   6   18.80    1.58 
  -2   4  -6   15.80    1.55 
  -2   4  -6   13.31    1.01 
   2  -4   6   13.96    1.30 
  -3   4  -6   40.50    2.48 
  -3   4  -6   38.60    1.89 
   3  -4   6   40.01    2.19 
  -4   4  -6    2.11    0.64 
  -4   4  -6    2.02    0.80 
   4  -4   6    3.34    0.72 
  -5   4  -6   -0.08    0.20 
  -5   4  -6    0.26    0.41 
   5  -4   6   -0.41    0.16 
  -6   4  -6    9.75    1.69 
  -6   4  -6    8.79    1.42 
   6  -4   6   11.13    1.42 
  -7   4  -6    1.01    0.56 
  -7   4  -6    1.33    0.44 
  -8   4  -6    5.59    1.49 
  -8   4  -6    5.44    1.19 
  -9   4  -6    0.12    0.35 
  -9   4  -6    0.23    0.43 
  -8  -3   6    0.98    0.41 
  -8  -3   6    0.16    0.36 
  -7  -3   6   10.08    1.84 
  -7  -3   6    7.65    1.34 
  -6  -3   6    0.27    0.31 
  -6  -3   6   -0.45    0.26 
   5   3  -6   39.24    2.13 
  -5  -3   6   37.82    2.67 
  -5  -3   6   42.26    2.61 
   4   3  -6   14.54    1.26 
  -4  -3   6   15.14    1.45 
  -4  -3   6   15.64    1.53 
  -4  -3   6   14.75    1.31 
   3   3  -6    7.69    1.22 
  -3  -3   6    8.31    1.18 
  -3  -3   6    8.74    1.35 
  -3  -3   6    7.96    1.32 
   2   3  -6   13.37    1.18 
   2   3  -6   13.03    1.18 
  -2  -3   6   12.94    1.19 
   1   3  -6   11.33    1.28 
   1   3  -6   10.19    0.98 
  -1  -3   6   10.51    1.33 
   0   3  -6   77.29    2.97 
   0   3  -6   79.32    2.58 
   0  -3   6   71.02    2.91 
  -1   3  -6   45.39    2.30 
  -1   3  -6   46.63    1.91 
   1  -3   6   45.81    2.28 
  -2   3  -6   51.11    2.57 
  -2   3  -6   49.59    2.05 
   2  -3   6   47.87    2.34 
  -3   3  -6   66.75    2.62 
  -3   3  -6   67.59    3.13 
   3  -3   6   67.55    2.81 
  -4   3  -6    4.82    1.09 
  -4   3  -6    5.32    0.96 
   4  -3   6    4.67    0.90 
  -5   3  -6    2.99    0.90 
  -5   3  -6    2.54    0.70 
   5  -3   6    3.79    0.79 
  -6   3  -6   23.68    2.10 
  -6   3  -6   24.59    2.01 
   6  -3   6   24.51    1.63 
  -7   3  -6   11.04    1.75 
  -7   3  -6   12.07    1.95 
  -8   3  -6   12.77    2.12 
  -8   3  -6   11.78    1.92 
  -9   3  -6    2.19    0.70 
  -9   3  -6    2.13    0.57 
  -8  -2   6    1.44    0.83 
  -8  -2   6    0.65    0.43 
  -7  -2   6    0.32    0.36 
  -7  -2   6    0.42    0.40 
  -6  -2   6    0.47    0.39 
  -6  -2   6    1.72    0.59 
   5   2  -6    1.65    0.48 
  -5  -2   6    2.88    0.84 
  -5  -2   6    4.24    0.98 
   4   2  -6    3.41    0.69 
  -4  -2   6    4.53    0.98 
  -4  -2   6    3.17    0.68 
  -4  -2   6    4.50    1.00 
   3   2  -6    2.06    0.70 
  -3  -2   6    1.76    0.56 
  -3  -2   6    2.72    0.75 
  -3  -2   6    2.45    0.64 
   2   2  -6   21.82    1.59 
  -2  -2   6   27.39    1.73 
  -2  -2   6   24.55    1.75 
   1   2  -6    5.97    0.91 
   1   2  -6    5.21    0.85 
  -1  -2   6    6.01    0.95 
   0   2  -6   54.23    2.21 
   0  -2   6   53.99    2.40 
  -1   2  -6   20.34    1.33 
  -1   2  -6   18.51    1.44 
   1  -2   6   17.22    1.36 
  -2   2  -6   32.65    1.74 
  -2   2  -6   27.21    1.82 
   2  -2   6   31.38    1.85 
  -3   2  -6    4.03    0.79 
  -3   2  -6    5.00    1.02 
   3  -2   6    4.66    0.93 
  -4   2  -6   12.52    1.27 
  -4   2  -6   12.71    1.68 
   4  -2   6   12.66    1.19 
  -5   2  -6    2.52    0.74 
  -5   2  -6    2.91    0.89 
   5  -2   6    3.47    0.75 
  -6   2  -6   33.43    2.41 
  -6   2  -6   33.32    2.36 
   6  -2   6   33.41    1.92 
  -7   2  -6    4.52    1.10 
  -7   2  -6    4.29    1.07 
   7  -2   6    4.22    0.80 
  -8   2  -6    2.95    0.83 
  -9   2  -6    4.46    1.11 
  -9   2  -6    2.49    0.68 
  -8  -1   6    0.11    0.47 
  -8  -1   6    1.12    0.44 
  -7  -1   6    0.93    0.51 
  -7  -1   6    1.81    0.54 
  -6  -1   6    8.13    1.59 
  -6  -1   6    7.33    1.62 
  -5  -1   6    0.95    0.50 
  -5  -1   6    0.95    0.40 
  -4  -1   6    1.91    0.74 
  -4  -1   6    2.51    0.52 
  -4  -1   6    2.58    0.84 
   3   1  -6    2.47    0.78 
  -3  -1   6    2.26    0.50 
  -3  -1   6    2.06    0.67 
  -3  -1   6    3.00    0.88 
   2   1  -6    9.55    1.33 
  -2  -1   6    7.31    0.98 
  -2  -1   6    7.76    1.23 
  -2  -1   6    7.05    1.25 
   1   1  -6    0.04    0.33 
  -1  -1   6    0.16    0.36 
  -1  -1   6    0.06    0.24 
   0   1  -6    2.45    0.66 
   0   1  -6    1.96    0.58 
   0  -1   6    2.78    0.66 
  -1   1  -6   10.78    1.33 
  -1   1  -6   11.15    1.08 
   1  -1   6   10.54    1.26 
  -2   1  -6    6.16    0.94 
  -2   1  -6    7.44    1.17 
   2  -1   6    7.13    1.03 
  -3   1  -6    6.58    1.18 
  -3   1  -6    6.78    1.02 
   3  -1   6    4.95    0.89 
  -4   1  -6   30.67    1.95 
  -4   1  -6   33.59    2.13 
   4  -1   6   32.98    1.89 
  -5   1  -6   25.18    1.87 
  -5   1  -6   26.77    1.95 
   5  -1   6   22.93    1.59 
  -6   1  -6    9.33    1.57 
  -6   1  -6    7.83    1.36 
   6  -1   6    9.61    1.28 
  -7   1  -6   27.19    2.26 
  -7   1  -6   25.99    2.13 
   7  -1   6   24.67    1.66 
  -8   1  -6   10.39    1.81 
  -8   1  -6   12.89    1.93 
  -9   1  -6   10.03    1.76 
  -9   1  -6    8.21    1.72 
 -10   1  -6    1.13    0.39 
 -10   1  -6    2.07    0.61 
  -7   0   6    0.15    0.47 
  -7   0   6    2.03    0.68 
  -6   0   6   13.00    1.98 
  -6   0   6   11.74    1.97 
  -5   0   6   32.47    2.43 
  -5   0   6   31.71    2.54 
  -4   0   6    5.71    1.20 
  -4   0   6    7.38    1.37 
  -4   0   6    6.53    0.84 
   3   0  -6   30.52    2.13 
  -3   0   6   28.66    2.10 
  -3   0   6   30.62    2.20 
  -3   0   6   30.46    1.59 
   2   0  -6   38.69    2.24 
  -2   0   6   37.97    2.29 
  -2   0   6   38.23    1.84 
  -2   0   6   37.98    2.30 
   1   0  -6    3.96    0.85 
  -1   0   6    3.45    0.82 
  -1   0   6    2.84    0.66 
   0   0  -6    2.35    0.65 
   0   0  -6    2.69    0.72 
   0   0   6    2.00    0.71 
   0   0   6    2.09    0.59 
  -1   0  -6   79.50    2.70 
  -1   0  -6   79.90    2.84 
   1   0   6   75.25    2.78 
  -2   0  -6   13.84    1.26 
  -2   0  -6   14.69    1.31 
   2   0   6   13.28    1.19 
  -3   0  -6  160.98    4.45 
  -3   0  -6  166.09    4.50 
   3   0   6  163.46    4.46 
  -4   0  -6    7.51    1.20 
  -4   0  -6    7.50    1.20 
   4   0   6    8.20    1.25 
  -5   0  -6    0.86    0.47 
  -5   0  -6    0.14    0.34 
   5   0   6    0.55    0.35 
  -6   0  -6    0.33    0.34 
  -6   0  -6    0.19    0.36 
   6   0   6    0.04    0.23 
  -7   0  -6   22.29    2.04 
  -7   0  -6   23.89    1.98 
   7   0   6   23.33    1.64 
  -8   0  -6    0.25    0.34 
  -8   0  -6    0.00    0.28 
  -9   0  -6    0.38    0.41 
  -9   0  -6   -0.39    0.33 
 -10   0  -6    1.14    0.53 
 -10   0  -6   -0.34    0.30 
  -7   1   6    0.45    0.45 
  -7   1   6   -0.06    0.56 
  -6   1   6   14.45    2.23 
  -6   1   6   10.88    1.89 
  -5   1   6    1.34    0.53 
  -5   1   6    1.01    0.37 
  -4   1   6    2.75    0.87 
  -4   1   6    2.09    0.36 
  -4   1   6    3.12    0.86 
   3  -1  -6   14.51    1.85 
  -3   1   6   13.83    1.86 
  -3   1   6   14.98    1.03 
  -3   1   6   16.22    1.57 
   2  -1  -6  172.50    5.18 
  -2   1   6  175.01    5.38 
  -2   1   6  176.66    4.24 
   1  -1  -6   29.68    1.90 
  -1   1   6   27.99    1.58 
  -1   1   6   28.53    1.97 
   0  -1  -6  190.11    5.02 
   0   1   6  198.41    4.76 
   0   1   6  201.15    5.21 
  -1  -1  -6    0.22    0.30 
  -1  -1  -6   -0.12    0.33 
   1   1   6    0.40    0.34 
  -2  -1  -6  116.90    3.52 
  -2  -1  -6  125.91    3.81 
   2   1   6  123.55    3.68 
  -3  -1  -6   36.14    1.91 
  -3  -1  -6   30.39    1.91 
   3   1   6   32.46    1.89 
  -4  -1  -6   16.78    1.53 
  -4  -1  -6   17.55    1.42 
   4   1   6   16.75    1.39 
  -5  -1  -6   66.79    3.17 
  -5  -1  -6   74.63    3.04 
   5   1   6   69.96    2.89 
  -6  -1  -6    1.07    0.52 
   6   1   6    1.81    0.55 
  -7  -1  -6   33.12    2.22 
  -7  -1  -6   34.58    2.57 
   7   1   6   33.27    2.02 
  -8  -1  -6    0.34    0.32 
  -8  -1  -6    0.66    0.45 
   8   1   6    0.04    0.21 
  -9  -1  -6    0.16    0.32 
  -9  -1  -6    1.88    0.45 
 -10  -1  -6   -0.44    0.30 
 -10  -1  -6    0.29    0.36 
  -7   2   6   -0.39    0.32 
  -7   2   6   -0.25    0.44 
  -6   2   6    7.17    1.44 
  -6   2   6    6.79    1.54 
  -5   2   6    4.48    1.14 
  -5   2   6    6.88    1.56 
   4  -2  -6    7.23    1.42 
  -4   2   6    8.40    1.58 
  -4   2   6    9.56    1.70 
   3  -2  -6    3.37    0.87 
  -3   2   6    4.05    1.05 
  -3   2   6    1.66    0.69 
  -3   2   6    2.49    0.52 
   2  -2  -6   11.55    1.57 
  -2   2   6    8.18    1.40 
  -2   2   6   10.12    0.91 
   1  -2  -6    4.40    0.90 
  -1   2   6    4.97    1.06 
  -1   2   6    4.55    0.79 
   0  -2  -6   30.53    1.91 
   0   2   6   27.75    1.63 
   0   2   6   31.70    1.97 
  -1  -2  -6    6.67    1.08 
  -1  -2  -6    6.29    0.92 
   1   2   6    5.46    0.92 
   1   2   6    6.14    1.06 
  -2  -2  -6    0.02    0.37 
  -2  -2  -6    0.23    0.21 
   2   2   6   -0.08    0.30 
  -3  -2  -6   30.04    1.92 
  -3  -2  -6   29.49    1.63 
   3   2   6   27.55    1.77 
  -4  -2  -6    0.20    0.31 
  -4  -2  -6   -0.17    0.33 
   4   2   6   -0.50    0.26 
  -5  -2  -6    7.42    1.15 
  -5  -2  -6    7.90    1.34 
   5   2   6    7.36    1.18 
  -6  -2  -6   10.88    1.40 
  -6  -2  -6   12.45    1.75 
   6   2   6   10.57    1.41 
  -7  -2  -6    1.35    0.64 
  -7  -2  -6    3.31    0.88 
   7   2   6    4.34    0.90 
  -8  -2  -6   37.10    2.87 
  -8  -2  -6   43.05    2.57 
   8   2   6   39.13    2.36 
  -9  -2  -6   12.62    1.31 
  -9  -2  -6   10.59    1.94 
 -10  -2  -6   -0.67    0.32 
 -10  -2  -6    0.43    0.34 
  -7   3   6    0.85    0.53 
  -7   3   6    1.11    0.47 
  -6   3   6    1.30    0.53 
  -6   3   6    1.57    0.46 
   5  -3  -6   13.57    2.05 
  -5   3   6   12.56    2.07 
  -5   3   6   12.18    2.04 
   4  -3  -6    7.00    1.34 
  -4   3   6    7.07    1.49 
  -4   3   6    5.11    1.18 
   3  -3  -6   49.47    2.89 
  -3   3   6   48.52    1.91 
  -3   3   6   48.61    2.99 
  -3   3   6   46.75    2.97 
   2  -3  -6   28.55    2.06 
  -2   3   6   27.95    2.13 
  -2   3   6   27.67    1.50 
   1  -3  -6    1.57    0.59 
  -1   3   6    1.96    0.53 
  -1   3   6    1.94    0.68 
   0  -3  -6    0.28    0.39 
   0   3   6    0.00    0.24 
   0   3   6   -0.12    0.31 
  -1  -3  -6    0.70    0.46 
   1   3   6    0.32    0.38 
   1   3   6   -0.09    0.25 
  -2  -3  -6   15.97    1.16 
  -2  -3  -6   16.31    1.42 
   2   3   6   17.11    1.39 
  -3  -3  -6    5.80    1.09 
  -3  -3  -6    5.79    0.94 
   3   3   6    6.40    1.05 
  -4  -3  -6   56.71    2.30 
  -4  -3  -6   51.77    2.63 
   4   3   6   52.90    2.62 
  -5  -3  -6   31.95    2.18 
  -5  -3  -6   31.16    1.75 
   5   3   6   32.06    2.09 
  -6  -3  -6   19.41    1.40 
  -6  -3  -6   19.02    1.77 
   6   3   6   16.81    1.55 
  -7  -3  -6   95.06    4.32 
  -7  -3  -6   96.57    3.57 
   7   3   6   98.20    3.89 
  -8  -3  -6    9.01    1.36 
  -8  -3  -6    9.40    1.69 
   8   3   6    7.66    1.30 
  -9  -3  -6    4.11    1.14 
  -9  -3  -6    5.85    1.07 
   9   3   6    3.05    0.99 
 -10  -3  -6    5.82    1.57 
   6  -4  -6   10.41    2.06 
  -6   4   6    7.78    1.83 
  -6   4   6    8.49    1.78 
   5  -4  -6    2.33    0.84 
  -5   4   6   -0.03    0.49 
  -5   4   6    0.63    0.37 
   4  -4  -6    1.81    0.62 
  -4   4   6    2.75    0.90 
  -4   4   6    4.36    1.15 
   3  -4  -6    0.44    0.29 
  -3   4   6    0.66    0.53 
   2  -4  -6   13.36    1.83 
  -2   4   6   14.72    1.99 
  -2   4   6   13.81    1.06 
   1  -4  -6    1.34    0.49 
  -1   4   6    1.54    0.61 
  -1   4   6    1.68    0.45 
   0  -4  -6   30.99    2.00 
   0   4   6   30.13    2.05 
   0   4   6   31.95    1.84 
  -1  -4  -6    7.04    1.11 
   1   4   6    6.64    1.18 
   1   4   6    7.15    1.08 
  -2  -4  -6    3.36    0.86 
  -2  -4  -6    3.15    0.66 
   2   4   6    2.91    0.73 
   2   4   6    3.62    0.80 
  -3  -4  -6   20.70    1.62 
   3   4   6   22.56    1.68 
  -4  -4  -6    4.38    0.95 
  -4  -4  -6    3.70    0.70 
   4   4   6    4.03    0.90 
  -5  -4  -6   41.82    2.48 
  -5  -4  -6   40.36    1.88 
   5   4   6   40.04    2.39 
  -6  -4  -6   12.49    1.05 
  -6  -4  -6   13.62    1.88 
   6   4   6   12.38    1.64 
  -7  -4  -6    4.91    1.20 
  -7  -4  -6    5.39    0.96 
   7   4   6    6.40    1.27 
  -8  -4  -6    4.47    0.87 
  -8  -4  -6    5.46    1.27 
   8   4   6    4.93    1.10 
  -9  -4  -6    8.32    1.69 
   9   4   6    9.46    1.52 
 -10  -4  -6    0.38    0.47 
   6  -5  -6    0.58    0.50 
  -6   5   6    1.06    0.49 
  -6   5   6   -0.74    0.39 
   5  -5  -6    0.18    0.51 
  -5   5   6    0.64    0.36 
  -5   5   6    0.27    0.39 
   4  -5  -6    0.08    0.42 
  -4   5   6    0.07    0.35 
   3  -5  -6   58.95    3.35 
  -3   5   6   59.34    3.54 
   2  -5  -6   62.85    3.28 
  -2   5   6   65.82    3.51 
  -2   5   6   65.65    2.58 
   1  -5  -6   25.42    1.95 
  -1   5   6   23.63    1.99 
  -1   5   6   24.87    1.59 
   0  -5  -6   16.56    1.51 
   0   5   6   15.97    1.49 
   0   5   6   16.61    1.38 
  -1  -5  -6   -0.21    0.15 
   1   5   6    0.33    0.29 
   1   5   6    0.08    0.31 
  -2  -5  -6   27.33    1.87 
   2   5   6   27.68    1.87 
   2   5   6   30.24    1.80 
  -3  -5  -6   50.84    2.59 
  -3  -5  -6   52.72    2.03 
   3   5   6   52.23    2.67 
  -4  -5  -6   95.84    3.73 
  -4  -5  -6  100.24    2.91 
   4   5   6   96.58    3.83 
  -5  -5  -6   57.49    2.15 
  -5  -5  -6   54.69    2.92 
   5   5   6   57.99    2.98 
  -6  -5  -6    6.69    1.30 
  -6  -5  -6    6.00    0.87 
   6   5   6    6.34    1.22 
  -7  -5  -6    1.64    0.56 
  -7  -5  -6    1.18    0.25 
   7   5   6    1.53    0.63 
  -8  -5  -6   11.74    1.92 
   8   5   6   14.29    1.93 
  -9  -5  -6    0.30    0.64 
   9   5   6    1.07    0.38 
 -10  -5  -6   -0.77    0.49 
   5  -6  -6   10.29    1.84 
  -5   6   6   12.93    2.20 
   4  -6  -6    0.24    0.49 
  -4   6   6    0.92    0.38 
   3  -6  -6    0.77    0.33 
  -3   6   6    0.06    0.28 
   2  -6  -6    0.99    0.46 
  -2   6   6   -0.05    0.34 
  -2   6   6   -0.58    0.16 
   1  -6  -6   22.35    1.84 
  -1   6   6   19.72    1.49 
  -1   6   6   19.77    1.83 
   0  -6  -6    0.42    0.30 
   0   6   6   -0.27    0.28 
   0   6   6    0.21    0.25 
  -1  -6  -6    1.82    0.59 
   1   6   6   -0.05    0.24 
   1   6   6    0.50    0.31 
  -2  -6  -6    0.92    0.42 
   2   6   6    0.63    0.37 
  -3  -6  -6    2.72    0.52 
  -3  -6  -6    1.46    0.54 
   3   6   6    1.73    0.64 
  -4  -6  -6    0.67    0.27 
  -4  -6  -6    1.84    0.66 
   4   6   6    0.69    0.49 
  -5  -6  -6   21.35    1.16 
  -5  -6  -6   23.30    1.89 
   5   6   6   21.39    1.85 
  -6  -6  -6    0.78    0.45 
   6   6   6    0.38    0.29 
  -7  -6  -6   19.50    1.85 
   7   6   6   17.44    1.72 
  -8  -6  -6    0.92    0.38 
   8   6   6    1.53    0.55 
  -9  -6  -6   -0.47    0.51 
   9   6   6    0.32    0.25 
 -10  -6  -6    0.43    0.36 
  10   6   6    0.74    0.41 
   4  -7  -6    5.75    1.44 
  -4   7   6    5.20    1.41 
   3  -7  -6    4.34    1.07 
  -3   7   6    7.18    1.50 
   2  -7  -6    5.39    1.13 
  -2   7   6    3.07    0.94 
  -1   7   6    1.63    0.81 
  -1   7   6   -0.20    0.22 
   0  -7  -6    0.42    0.32 
   0   7   6    0.23    0.29 
   0   7   6    0.28    0.33 
  -1  -7  -6    0.48    0.33 
   1   7   6    1.12    0.49 
   1   7   6    1.58    0.58 
  -2  -7  -6    3.33    0.83 
   2   7   6    2.40    0.68 
   2   7   6    3.65    0.85 
  -3  -7  -6   -0.04    0.26 
  -3  -7  -6    0.25    0.32 
   3   7   6    0.77    0.43 
   3   7   6    0.46    0.28 
  -4  -7  -6   -0.08    0.21 
  -4  -7  -6    0.15    0.13 
   4   7   6    0.31    0.28 
  -5  -7  -6    8.15    1.40 
   5   7   6    6.21    1.34 
  -6  -7  -6    1.12    0.58 
   6   7   6    0.63    0.42 
  -7  -7  -6    4.27    1.05 
   7   7   6    1.60    0.65 
  -8  -7  -6    1.42    0.53 
   8   7   6    1.14    0.58 
  -9  -7  -6    0.31    0.39 
   9   7   6   -0.25    0.28 
 -10  -7  -6    0.39    0.39 
  10   7   6    0.47    0.37 
   4  -8  -6   14.67    2.18 
  -4   8   6   12.53    2.09 
   3  -8  -6    3.24    0.97 
  -3   8   6    5.84    1.27 
   2  -8  -6    1.04    0.44 
  -2   8   6    0.63    0.40 
   1  -8  -6    3.72    0.90 
  -1   8   6    3.77    0.94 
  -1   8   6    3.57    0.81 
   0  -8  -6   10.45    1.60 
   0   8   6    7.35    1.31 
   0   8   6    6.77    1.18 
  -1  -8  -6    0.49    0.33 
   1   8   6    0.09    0.23 
   1   8   6    0.77    0.31 
  -2  -8  -6   -0.11    0.24 
   2   8   6    0.77    0.36 
   2   8   6    0.61    0.33 
  -3  -8  -6    8.98    1.41 
   3   8   6    9.90    1.36 
   3   8   6   12.82    1.82 
  -4  -8  -6   23.97    1.89 
   4   8   6   26.67    2.21 
  -5  -8  -6    9.08    1.51 
   5   8   6    4.94    1.12 
  -6  -8  -6    3.09    0.94 
   6   8   6    3.10    0.89 
  -7  -8  -6    4.01    0.88 
   7   8   6    4.20    1.11 
  -8  -8  -6    0.13    0.27 
   8   8   6    0.73    0.38 
  -9  -8  -6    0.24    0.28 
   9   8   6    0.60    0.31 
   3  -9  -6    0.66    0.32 
  -3   9   6    0.52    0.41 
   2  -9  -6    0.17    0.30 
  -2   9   6    0.19    0.35 
   1  -9  -6    0.92    0.36 
  -1   9   6    0.05    0.41 
   0  -9  -6    4.80    0.95 
   0   9   6    4.18    0.97 
   0   9   6    3.70    0.82 
  -1  -9  -6    0.46    0.38 
   1   9   6    0.15    0.31 
   1   9   6    0.12    0.31 
  -2  -9  -6    0.93    0.42 
   2   9   6    0.31    0.30 
  -3  -9  -6    0.37    0.34 
   3   9   6    1.00    0.40 
  -4  -9  -6    1.54    0.51 
   4   9   6    1.11    0.63 
  -5  -9  -6    2.28    0.64 
   5   9   6    1.48    0.65 
  -6  -9  -6   -0.11    0.29 
   6   9   6    1.10    0.59 
  -7  -9  -6    0.14    0.28 
   7   9   6    1.22    0.52 
  -8  -9  -6    6.72    1.41 
   8   9   6    8.26    1.67 
  -9  -9  -6    1.98    0.59 
   9   9   6    4.40    0.94 
  -2  10   6    0.44    0.41 
  -1  10   6    0.90    0.38 
   0  10   6    0.78    0.31 
   0  10   6    0.97    0.38 
   1  10   6    0.37    0.31 
  -2 -10  -6    0.18    0.34 
   2  10   6    0.18    0.28 
  -3 -10  -6   13.23    1.26 
   3  10   6   16.89    2.26 
   4  10   6    1.50    0.59 
  -5 -10  -6    1.10    0.33 
   5  10   6   -0.01    0.48 
  -6 -10  -6    6.87    1.26 
   6  10   6    5.43    1.23 
  -7 -10  -6    3.20    0.72 
   7  10   6    3.76    0.94 
  -8 -10  -6    0.56    0.35 
   8  10   6   -0.02    0.34 
   1  11   6    0.39    0.42 
   2  11   6    4.08    0.99 
   3  11   6   -0.18    0.33 
   4  11   6   -0.37    0.43 
   5  11   6    1.36    0.84 
   6  11   6    0.37    0.41 
   7  11   6    6.04    1.26 
   2  12   6    0.54    0.38 
   3  12   6   -0.58    0.39 
   4  12   6    2.40    0.82 
   5  12   6    0.23    0.45 
   3  11  -7   -0.50    0.31 
   1  11  -7    0.98    0.47 
   0  11  -7   -0.17    0.42 
  -1  11  -7    0.56    0.50 
  -2  11  -7    2.47    0.67 
   5  10  -7    1.85    0.58 
   4  10  -7   -0.38    0.27 
   3  10  -7    0.37    0.37 
   2  10  -7    0.27    0.31 
   1  10  -7   12.70    1.95 
   0  10  -7    7.55    1.58 
  -1  10  -7    2.21    0.64 
  -1  10  -7    4.02    1.00 
  -2  10  -7    1.15    0.43 
  -2  10  -7    0.53    0.35 
  -3  10  -7    3.40    0.70 
  -3  10  -7    6.77    1.45 
  -4  10  -7    0.68    0.42 
   6   9  -7   -0.03    0.35 
   5   9  -7    2.98    0.86 
   4   9  -7    0.07    0.32 
   3   9  -7    2.80    0.89 
   2   9  -7    2.66    0.86 
   1   9  -7    3.48    0.92 
   1   9  -7    3.14    0.84 
   0   9  -7    6.36    1.26 
   0   9  -7    7.52    1.45 
  -1   9  -7    0.16    0.35 
  -1   9  -7   -0.35    0.26 
  -2   9  -7    8.91    1.66 
  -2   9  -7   14.83    2.08 
  -3   9  -7    0.82    0.34 
  -3   9  -7    0.24    0.28 
  -4   9  -7    2.69    0.74 
  -4   9  -7    2.26    0.65 
  -5   9  -7    1.43    0.48 
   6   8  -7    8.99    1.53 
   5   8  -7    9.61    1.65 
   4   8  -7   -0.67    0.26 
   3   8  -7    2.16    0.59 
   2   8  -7   17.89    1.51 
   2   8  -7   15.24    2.10 
   1   8  -7    5.03    1.03 
   1   8  -7    4.28    1.03 
   0   8  -7    9.94    1.59 
   0   8  -7    8.98    1.50 
  -1   8  -7   15.73    2.04 
  -1   8  -7   16.15    2.11 
  -2   8  -7    0.87    0.49 
  -2   8  -7    1.22    0.57 
   2  -8   7    0.37    0.32 
  -3   8  -7   14.33    2.05 
  -3   8  -7   16.26    1.58 
  -4   8  -7    2.08    0.70 
  -4   8  -7    2.07    0.54 
  -5   8  -7   -0.27    0.36 
  -6   8  -7   16.87    2.62 
   6   7  -7    3.95    0.92 
   5   7  -7   30.47    2.41 
   4   7  -7    0.38    0.30 
   3   7  -7    0.51    0.33 
   3   7  -7    1.27    0.52 
   2   7  -7    9.58    1.40 
   2   7  -7    9.21    1.52 
   1   7  -7   14.19    1.89 
   1   7  -7   16.62    1.51 
  -1  -7   7   20.11    1.82 
   0   7  -7    4.84    1.09 
   0   7  -7    4.75    1.09 
   0  -7   7    5.51    1.28 
  -1   7  -7   -0.15    0.21 
  -1   7  -7    0.87    0.58 
   1  -7   7    0.42    0.37 
  -2   7  -7    6.00    1.17 
  -2   7  -7    5.88    1.27 
   2  -7   7    5.69    1.26 
  -3   7  -7    5.15    1.03 
  -3   7  -7    3.65    1.01 
   3  -7   7    4.11    1.04 
  -4   7  -7    2.09    0.81 
  -4   7  -7    0.74    0.37 
   4  -7   7    1.87    0.63 
  -5   7  -7    7.43    1.59 
  -5   7  -7    5.68    0.98 
   5  -7   7    6.32    1.19 
  -6   7  -7    6.57    1.52 
  -7   7  -7    7.81    1.50 
  -7  -6   7    1.55    0.46 
   6   6  -7   -0.17    0.27 
  -6  -6   7   -0.33    0.31 
   5   6  -7    0.82    0.32 
   5   6  -7    0.66    0.35 
   5   6  -7    0.60    0.35 
  -5  -6   7    1.26    0.31 
   4   6  -7    9.94    1.56 
   4   6  -7   11.26    1.52 
  -4  -6   7   10.26    1.48 
   3   6  -7    4.74    0.94 
   3   6  -7    3.86    0.77 
   3   6  -7    3.42    0.87 
   2   6  -7    4.00    1.03 
   2   6  -7    4.54    0.77 
   2   6  -7    4.25    0.90 
  -2  -6   7    5.26    1.14 
   1   6  -7    0.40    0.26 
   1   6  -7    0.10    0.14 
   1   6  -7    0.31    0.33 
  -1  -6   7    0.30    0.27 
   0   6  -7    0.11    0.27 
   0   6  -7    0.10    0.14 
   0  -6   7    0.30    0.30 
  -1   6  -7    2.99    0.46 
  -1   6  -7    1.97    0.78 
   1  -6   7    3.22    0.86 
  -2   6  -7    0.96    0.28 
  -2   6  -7    0.25    0.51 
   2  -6   7    0.26    0.29 
  -3   6  -7   18.76    1.83 
  -3   6  -7   17.92    2.33 
   3  -6   7   15.89    1.55 
  -4   6  -7    2.68    0.84 
   4  -6   7    1.51    0.64 
  -5   6  -7    5.95    1.39 
   5  -6   7    3.92    0.87 
  -6   6  -7   38.45    3.01 
  -7   6  -7    0.11    0.42 
  -7  -5   7    1.55    0.74 
   6   5  -7   18.77    1.70 
  -6  -5   7   20.96    1.99 
  -6  -5   7   17.69    1.60 
   5   5  -7   14.72    1.87 
   5   5  -7   16.14    1.47 
  -5  -5   7   16.10    1.58 
  -5  -5   7   14.95    1.53 
   4   5  -7   40.40    2.43 
   4   5  -7   39.33    2.25 
   4   5  -7   38.91    2.47 
  -4  -5   7   41.30    2.53 
   3   5  -7    0.01    0.17 
   3   5  -7    0.66    0.31 
   3   5  -7   -0.10    0.14 
  -3  -5   7    0.09    0.26 
   2   5  -7   -0.33    0.28 
   2   5  -7    0.35    0.33 
   2   5  -7    0.00    0.16 
  -2  -5   7   -0.45    0.16 
   1   5  -7   10.22    1.47 
   1   5  -7    8.05    1.04 
  -1  -5   7   10.15    1.51 
   0   5  -7    3.51    0.89 
   0   5  -7    2.54    0.52 
   0  -5   7    1.93    0.62 
  -1   5  -7    0.44    0.18 
  -1   5  -7    0.77    0.52 
   1  -5   7    0.36    0.30 
  -2   5  -7    1.27    0.66 
  -2   5  -7    0.98    0.44 
   2  -5   7    1.85    0.64 
  -3   5  -7    7.91    1.07 
  -3   5  -7    7.20    1.37 
   3  -5   7    7.25    1.26 
  -4   5  -7    2.19    0.62 
  -4   5  -7    2.31    0.83 
   4  -5   7    3.34    0.84 
  -5   5  -7    1.99    0.51 
  -5   5  -7    0.56    0.53 
   5  -5   7    4.00    0.92 
  -6   5  -7    0.02    0.22 
  -6   5  -7   -0.31    0.26 
   6  -5   7    0.81    0.35 
  -7   5  -7    1.73    0.62 
  -7   5  -7    1.29    0.33 
  -8   5  -7    5.78    1.63 
  -8   5  -7    4.20    0.77 
  -7  -4   7    0.29    0.46 
  -7  -4   7    0.47    0.41 
  -6  -4   7    0.40    0.33 
  -6  -4   7    0.60    0.33 
   5   4  -7   16.10    1.47 
  -5  -4   7   19.03    1.69 
  -5  -4   7   19.27    1.85 
   4   4  -7   60.64    3.11 
   4   4  -7   62.97    3.03 
   4   4  -7   62.53    2.95 
  -4  -4   7   61.31    3.23 
  -4  -4   7   61.58    3.15 
   3   4  -7   12.26    1.47 
   3   4  -7   13.24    1.27 
   3   4  -7   11.82    1.51 
  -3  -4   7   16.26    1.44 
   2   4  -7   47.10    2.32 
   2   4  -7   46.75    2.33 
  -2  -4   7   44.89    2.51 
   1   4  -7    8.33    1.12 
   1   4  -7    8.53    1.32 
  -1  -4   7    8.60    1.35 
   0   4  -7   11.16    1.48 
   0   4  -7   12.70    1.02 
   0  -4   7   11.59    1.58 
  -1   4  -7   10.99    0.96 
  -1   4  -7   13.28    1.72 
   1  -4   7   11.67    1.53 
  -2   4  -7    0.91    0.40 
  -2   4  -7    1.26    0.64 
   2  -4   7    1.28    0.54 
  -3   4  -7   56.53    2.46 
  -3   4  -7   53.66    2.98 
   3  -4   7   58.64    2.84 
  -4   4  -7    7.49    1.13 
  -4   4  -7    7.53    1.45 
   4  -4   7    7.00    1.17 
  -5   4  -7    5.82    1.30 
  -5   4  -7    7.30    1.22 
   5  -4   7    6.73    1.12 
  -6   4  -7    4.06    1.11 
  -6   4  -7    3.45    0.93 
   6  -4   7    2.82    0.74 
  -7   4  -7   24.09    2.32 
  -7   4  -7   23.94    2.07 
  -8   4  -7    3.30    1.00 
  -8   4  -7    1.98    0.60 
  -9   4  -7    0.93    0.35 
  -9   4  -7    1.87    0.54 
  -7  -3   7    4.37    1.15 
  -7  -3   7    1.88    0.48 
  -6  -3   7    1.81    0.55 
  -6  -3   7    1.87    0.61 
   5   3  -7    5.88    1.02 
  -5  -3   7    6.54    1.31 
  -5  -3   7    4.87    1.02 
   4   3  -7    1.54    0.55 
   4   3  -7    0.65    0.35 
  -4  -3   7    1.09    0.38 
  -4  -3   7    0.95    0.43 
  -4  -3   7    1.10    0.52 
   3   3  -7   -0.47    0.26 
   3   3  -7   -0.20    0.19 
  -3  -3   7    0.23    0.30 
  -3  -3   7   -0.05    0.27 
  -3  -3   7   -0.16    0.24 
   2   3  -7    3.18    0.77 
   2   3  -7    2.94    0.71 
  -2  -3   7    3.37    0.78 
   1   3  -7    1.52    0.52 
   1   3  -7    2.44    0.60 
  -1  -3   7    2.25    0.64 
   0   3  -7    2.43    0.77 
   0   3  -7    1.88    0.52 
   0  -3   7    2.79    0.65 
  -1   3  -7    1.05    0.43 
  -1   3  -7    0.64    0.41 
   1  -3   7    0.62    0.42 
  -2   3  -7    2.65    0.80 
  -2   3  -7    2.91    0.70 
   2  -3   7    2.35    0.70 
  -3   3  -7   18.54    1.68 
  -3   3  -7   19.08    1.43 
   3  -3   7   20.04    1.60 
  -4   3  -7   23.11    1.69 
  -4   3  -7   24.13    1.98 
   4  -3   7   25.28    1.80 
  -5   3  -7    6.36    1.27 
  -5   3  -7    5.60    1.05 
   5  -3   7    3.96    0.85 
  -6   3  -7   40.57    2.62 
  -6   3  -7   40.54    2.83 
   6  -3   7   42.46    2.33 
  -7   3  -7    1.00    0.42 
  -7   3  -7    2.29    1.00 
  -8   3  -7    2.93    0.74 
  -8   3  -7    4.90    1.29 
  -9   3  -7   -0.21    0.44 
  -9   3  -7    0.54    0.32 
  -7  -2   7   -0.21    0.45 
  -7  -2   7   -0.86    0.45 
  -6  -2   7   17.83    2.48 
  -6  -2   7   19.09    2.52 
  -5  -2   7    0.20    0.24 
  -5  -2   7    0.70    0.31 
   4   2  -7    3.70    0.99 
  -4  -2   7    3.20    0.71 
  -4  -2   7    5.55    1.16 
  -4  -2   7    4.65    1.15 
   3   2  -7    4.64    1.03 
  -3  -2   7    3.51    0.73 
  -3  -2   7    3.78    0.94 
  -3  -2   7    4.45    1.01 
   2   2  -7    5.56    1.07 
   2   2  -7    2.88    0.75 
  -2  -2   7    5.58    1.10 
  -2  -2   7    3.32    0.75 
   1   2  -7    0.55    0.33 
   1   2  -7    1.44    0.53 
  -1  -2   7    0.97    0.38 
   0   2  -7    4.08    0.83 
   0  -2   7    6.56    1.06 
  -1   2  -7   45.07    2.41 
  -1   2  -7   48.49    2.22 
   1  -2   7   46.64    2.37 
  -2   2  -7   10.67    1.10 
  -2   2  -7   11.06    1.48 
   2  -2   7    8.56    1.25 
  -3   2  -7   18.98    1.65 
  -3   2  -7   17.53    1.43 
   3  -2   7   18.26    1.50 
  -4   2  -7   32.02    2.22 
  -4   2  -7   32.51    2.06 
   4  -2   7   32.02    1.99 
  -5   2  -7   21.08    1.84 
  -5   2  -7   21.55    1.76 
   5  -2   7   21.76    1.65 
  -6   2  -7    0.69    0.43 
  -6   2  -7   -0.46    0.26 
   6  -2   7    0.24    0.23 
  -7   2  -7    0.04    0.27 
  -7   2  -7    0.62    0.47 
   7  -2   7    0.19    0.19 
  -8   2  -7    1.37    0.42 
  -8   2  -7    1.41    0.56 
  -9   2  -7    1.29    0.60 
  -9   2  -7    2.65    0.79 
  -7  -1   7    2.76    1.00 
  -7  -1   7    3.07    1.01 
  -6  -1   7   12.09    2.02 
  -6  -1   7   17.52    2.43 
  -5  -1   7   16.16    1.66 
  -5  -1   7   12.46    1.91 
   4   1  -7    6.35    1.28 
  -4  -1   7    5.73    1.21 
  -4  -1   7    5.73    0.90 
  -4  -1   7    8.16    1.49 
   3   1  -7    0.47    0.33 
  -3  -1   7   -0.06    0.31 
  -3  -1   7   -0.11    0.17 
  -3  -1   7   -0.47    0.20 
   2   1  -7   13.87    1.37 
  -2  -1   7   13.25    1.16 
  -2  -1   7   14.28    1.44 
   1   1  -7   48.22    2.36 
   1   1  -7   46.53    2.42 
  -1  -1   7   48.64    2.33 
  -1  -1   7   47.82    2.57 
   0   1  -7    4.10    0.85 
   0   1  -7    4.08    0.87 
   0  -1   7    4.08    0.85 
  -1   1  -7   10.29    1.31 
  -1   1  -7   10.25    1.39 
   1  -1   7   10.78    1.33 
  -2   1  -7   37.63    2.03 
  -2   1  -7   39.90    2.19 
   2  -1   7   37.39    2.12 
  -3   1  -7   60.06    2.80 
  -3   1  -7   59.33    2.67 
   3  -1   7   63.38    2.81 
  -4   1  -7   15.72    1.46 
  -4   1  -7   18.04    1.55 
   4  -1   7   17.74    1.48 
  -5   1  -7    2.28    0.73 
  -5   1  -7    1.40    0.63 
   5  -1   7    1.37    0.51 
  -6   1  -7    3.08    0.89 
  -6   1  -7    5.07    1.17 
   6  -1   7    3.65    0.83 
  -7   1  -7    3.78    1.01 
  -7   1  -7    4.57    1.06 
   7  -1   7    5.50    1.03 
  -8   1  -7    0.88    0.67 
  -8   1  -7    1.04    0.61 
  -9   1  -7    5.89    1.30 
  -9   1  -7    8.72    1.67 
 -10   1  -7    2.60    0.59 
 -10   1  -7    4.03    1.05 
  -7   0   7   -0.18    0.53 
  -7   0   7   -0.62    0.41 
  -6   0   7   12.56    2.15 
  -6   0   7   12.87    2.20 
   5   0  -7    5.56    1.27 
  -5   0   7    5.82    1.34 
  -5   0   7    4.93    1.20 
   4   0  -7    6.41    1.33 
  -4   0   7    6.10    1.29 
  -4   0   7    9.77    1.66 
  -4   0   7    5.91    0.83 
   3   0  -7    3.60    0.94 
  -3   0   7    2.08    0.74 
  -3   0   7    3.74    0.74 
  -3   0   7    3.36    0.91 
   2   0  -7    3.04    0.88 
  -2   0   7    3.71    0.70 
  -2   0   7    3.87    0.97 
   1   0  -7    2.84    0.82 
  -1   0   7    3.40    0.85 
  -1   0   7    2.09    0.59 
   0   0  -7    2.58    0.70 
   0   0  -7    2.58    0.69 
   0   0   7    3.01    0.84 
   0   0   7    2.68    0.71 
  -1   0  -7    1.56    0.60 
  -1   0  -7    1.47    0.50 
   1   0   7    1.43    0.52 
  -2   0  -7   46.48    2.33 
  -2   0  -7   46.97    2.37 
   2   0   7   45.47    2.31 
  -3   0  -7    3.56    0.87 
  -3   0  -7    3.99    0.89 
   3   0   7    3.08    0.77 
  -4   0  -7   63.39    2.98 
  -4   0  -7   63.87    2.90 
   4   0   7   62.11    2.82 
  -5   0  -7    0.50    0.34 
  -5   0  -7   -0.23    0.38 
   5   0   7    0.04    0.25 
  -6   0  -7    2.90    0.91 
  -6   0  -7    4.09    0.98 
   6   0   7    3.40    0.80 
  -7   0  -7    0.09    0.32 
  -7   0  -7    0.23    0.39 
   7   0   7    1.93    0.57 
  -8   0  -7    5.01    1.09 
  -8   0  -7    5.17    1.24 
   8   0   7    6.05    1.03 
  -9   0  -7    3.81    1.10 
  -9   0  -7    2.54    0.68 
 -10   0  -7    5.95    1.24 
 -10   0  -7    5.58    1.27 
  -7   1   7    0.17    0.40 
  -7   1   7   -0.95    0.48 
   6  -1  -7    5.69    1.37 
  -6   1   7    2.43    0.90 
  -6   1   7    5.86    1.47 
   5  -1  -7    9.69    1.82 
  -5   1   7    7.97    1.56 
  -5   1   7    7.06    1.44 
   4  -1  -7   19.32    2.45 
  -4   1   7   20.26    2.03 
  -4   1   7   21.25    2.02 
   3  -1  -7    5.67    1.20 
  -3   1   7    4.90    1.13 
  -3   1   7    4.51    1.07 
  -3   1   7    4.15    0.71 
   2  -1  -7    3.29    0.93 
  -2   1   7    1.78    0.52 
  -2   1   7    0.65    0.47 
   1  -1  -7   22.66    1.79 
  -1   1   7   20.73    1.75 
  -1   1   7   20.30    1.47 
   0  -1  -7   -0.21    0.25 
   0   1   7   -0.19    0.24 
   0   1   7    0.82    0.49 
  -1  -1  -7    4.76    0.88 
  -1  -1  -7    3.64    0.86 
   1   1   7    5.34    0.96 
  -2  -1  -7   60.03    2.73 
  -2  -1  -7   55.17    2.49 
  -3  -1  -7    8.09    1.27 
  -3  -1  -7    8.18    1.23 
   3   1   7    7.75    1.19 
  -4  -1  -7    1.43    0.52 
  -4  -1  -7    1.23    0.55 
   4   1   7    0.82    0.49 
  -5  -1  -7   28.80    1.94 
  -5  -1  -7   25.49    2.00 
   5   1   7   24.26    1.79 
  -6  -1  -7   31.63    2.33 
  -6  -1  -7   27.77    2.00 
   6   1   7   28.52    1.97 
  -7  -1  -7   -0.05    0.25 
  -7  -1  -7    0.32    0.31 
   7   1   7    0.68    0.37 
  -8  -1  -7   19.86    2.57 
  -8  -1  -7   21.72    1.88 
   8   1   7   17.76    1.57 
  -9  -1  -7    5.37    1.29 
  -9  -1  -7    7.59    1.41 
 -10  -1  -7    1.14    0.39 
 -10  -1  -7    1.79    0.74 
   6  -2  -7   -0.01    0.43 
  -6   2   7    2.11    0.72 
  -6   2   7    0.49    0.41 
   5  -2  -7    0.31    0.29 
  -5   2   7    0.65    0.41 
  -5   2   7   -0.16    0.37 
   4  -2  -7    0.75    0.39 
  -4   2   7   -0.34    0.31 
  -4   2   7    1.35    0.53 
   3  -2  -7    0.35    0.28 
  -3   2   7    1.10    0.54 
  -3   2   7   -0.04    0.15 
   2  -2  -7    1.41    0.61 
  -2   2   7    1.25    0.47 
  -2   2   7    0.51    0.32 
   1  -2  -7    4.48    0.98 
  -1   2   7    4.64    1.06 
  -1   2   7    3.62    0.73 
   0  -2  -7   12.01    1.55 
   0   2   7   13.06    1.68 
   0   2   7   11.39    1.10 
  -1  -2  -7   47.37    2.51 
  -1  -2  -7   46.35    2.20 
   1   2   7   46.36    2.28 
   1   2   7   44.94    2.40 
  -2  -2  -7    4.53    0.84 
  -2  -2  -7    3.90    0.87 
   2   2   7    4.19    0.86 
  -3  -2  -7   11.70    1.20 
  -3  -2  -7   14.49    1.43 
   3   2   7   14.23    1.33 
  -4  -2  -7   11.18    1.14 
  -4  -2  -7   13.22    1.67 
   4   2   7   11.06    1.46 
  -5  -2  -7    3.85    0.84 
  -5  -2  -7    4.45    1.02 
   5   2   7    3.97    0.97 
  -6  -2  -7   20.86    1.95 
  -6  -2  -7   25.13    1.76 
   6   2   7   24.47    1.87 
  -7  -2  -7    0.28    0.36 
  -7  -2  -7   -0.60    0.22 
   7   2   7   -0.19    0.17 
  -8  -2  -7   20.05    2.07 
  -8  -2  -7   23.56    1.88 
   8   2   7   21.14    1.73 
  -9  -2  -7    6.08    1.17 
  -9  -2  -7    6.32    1.54 
 -10  -2  -7    1.10    0.39 
 -10  -2  -7    2.25    0.83 
   6  -3  -7    0.49    0.49 
  -6   3   7    0.81    0.37 
  -6   3   7    0.11    0.53 
   5  -3  -7    1.58    0.61 
  -5   3   7    1.50    0.53 
  -5   3   7    2.35    0.89 
   4  -3  -7    6.13    1.37 
  -4   3   7    6.27    1.47 
  -4   3   7    6.18    1.39 
   3  -3  -7    7.57    1.43 
  -3   3   7    5.91    0.79 
  -3   3   7    8.13    1.51 
   2  -3  -7    1.24    0.51 
  -2   3   7    1.12    0.60 
  -2   3   7    1.37    0.40 
   1  -3  -7    9.03    1.39 
  -1   3   7   11.42    1.36 
  -1   3   7    7.77    1.36 
   0  -3  -7    0.78    0.40 
   0   3   7    0.68    0.31 
   0   3   7    0.29    0.39 
  -1  -3  -7    4.56    0.94 
   1   3   7    4.38    0.86 
   1   3   7    5.00    1.08 
  -2  -3  -7    0.57    0.42 
  -2  -3  -7    0.16    0.27 
   2   3   7    0.17    0.27 
  -3  -3  -7   10.23    1.06 
  -3  -3  -7    9.67    1.38 
   3   3   7   11.13    1.41 
  -4  -3  -7    2.54    0.66 
  -4  -3  -7    2.88    0.78 
   4   3   7    1.93    0.64 
  -5  -3  -7   22.48    1.91 
  -5  -3  -7   20.67    1.51 
   5   3   7   19.92    1.70 
  -6  -3  -7    1.02    0.33 
  -6  -3  -7    0.32    0.35 
   6   3   7   -0.26    0.20 
  -7  -3  -7   27.54    1.88 
  -7  -3  -7   26.91    2.32 
   7   3   7   32.16    2.24 
  -8  -3  -7    0.78    0.51 
  -8  -3  -7    0.85    0.30 
   8   3   7    0.97    0.44 
  -9  -3  -7   11.13    2.09 
  -9  -3  -7    9.33    1.45 
   9   3   7   13.25    1.78 
 -10  -3  -7    4.21    1.24 
   6  -4  -7    0.90    0.46 
  -6   4   7    0.90    0.54 
  -6   4   7    1.40    0.47 
   5  -4  -7    6.77    1.58 
  -5   4   7    4.47    1.27 
  -5   4   7    8.70    1.82 
   4  -4  -7   44.80    3.12 
  -4   4   7   43.66    3.19 
   3  -4  -7    1.60    0.68 
  -3   4   7    1.10    0.58 
   2  -4  -7    2.79    0.80 
  -2   4   7    2.56    0.75 
  -2   4   7    0.95    0.34 
   1  -4  -7   20.81    1.80 
  -1   4   7   23.19    1.53 
  -1   4   7   22.63    1.96 
   0  -4  -7   -0.18    0.17 
   0   4   7   -0.04    0.27 
   0   4   7    0.26    0.18 
  -1  -4  -7    0.02    0.17 
   1   4   7    0.10    0.30 
   1   4   7   -0.19    0.15 
  -2  -4  -7   -0.07    0.27 
  -2  -4  -7   -0.10    0.20 
   2   4   7    0.43    0.35 
   2   4   7    0.12    0.31 
  -3  -4  -7   -0.06    0.17 
  -3  -4  -7   -0.04    0.25 
   3   4   7    0.22    0.32 
  -4  -4  -7    4.33    0.82 
  -4  -4  -7    4.51    0.98 
   4   4   7    4.96    1.03 
  -5  -4  -7    7.77    1.34 
  -5  -4  -7    7.20    1.04 
   5   4   7   10.66    1.57 
  -6  -4  -7   12.76    1.15 
  -6  -4  -7   15.08    2.04 
   6   4   7   17.31    2.11 
  -7  -4  -7   13.23    1.22 
  -7  -4  -7   14.57    2.04 
   7   4   7   14.65    1.93 
  -8  -4  -7    5.03    0.92 
  -8  -4  -7    5.46    1.27 
   8   4   7    5.44    1.17 
  -9  -4  -7    2.14    0.89 
   9   4   7    0.58    0.50 
 -10  -4  -7    0.53    0.67 
   5  -5  -7    0.98    0.44 
  -5   5   7    1.00    0.45 
   4  -5  -7   -0.37    0.29 
  -4   5   7    0.59    0.49 
   3  -5  -7   20.93    2.00 
  -3   5   7   20.28    2.63 
   2  -5  -7    0.24    0.34 
  -2   5   7    0.29    0.49 
  -2   5   7    0.20    0.16 
   1  -5  -7    5.20    1.13 
  -1   5   7    3.59    0.72 
  -1   5   7    3.51    0.97 
   0  -5  -7    0.56    0.38 
   0   5   7    0.63    0.38 
   0   5   7   -0.37    0.22 
  -1  -5  -7   18.19    1.65 
   1   5   7   17.05    1.48 
   1   5   7   15.44    1.49 
  -2  -5  -7    0.65    0.44 
   2   5   7    0.42    0.23 
   2   5   7    0.22    0.33 
  -3  -5  -7   13.09    1.09 
  -3  -5  -7   13.97    1.43 
   3   5   7   13.95    1.73 
  -4  -5  -7    0.70    0.43 
  -4  -5  -7    1.05    0.36 
   4   5   7    0.60    0.41 
  -5  -5  -7    1.07    0.59 
  -5  -5  -7    0.29    0.21 
   5   5   7   -0.58    0.24 
  -6  -5  -7   12.87    1.83 
  -6  -5  -7   11.53    1.03 
   6   5   7   11.51    1.68 
  -7  -5  -7    7.49    1.44 
  -7  -5  -7    7.33    1.07 
   7   5   7    5.76    1.24 
  -8  -5  -7   -0.31    0.39 
   8   5   7    0.70    0.32 
  -9  -5  -7    0.98    0.80 
   9   5   7    0.36    0.37 
 -10  -5  -7    2.53    1.01 
   5  -6  -7   -0.07    0.35 
   4  -6  -7    0.73    0.51 
  -4   6   7    0.70    0.41 
   3  -6  -7    0.37    0.35 
  -3   6   7    1.20    0.45 
   2  -6  -7   33.15    2.50 
  -2   6   7   30.72    2.51 
   1  -6  -7   11.23    1.66 
  -1   6   7   11.11    1.78 
  -1   6   7   11.14    1.44 
   0  -6  -7   33.76    2.37 
   0   6   7   31.32    2.07 
   0   6   7   28.90    2.22 
  -1  -6  -7    0.13    0.47 
   1   6   7    1.04    0.45 
   1   6   7    0.63    0.43 
  -2  -6  -7   18.24    1.66 
   2   6   7   14.43    1.36 
   2   6   7   18.69    1.63 
  -3  -6  -7    0.51    0.48 
  -3  -6  -7    1.46    0.43 
   3   6   7    1.72    0.55 
  -4  -6  -7    2.03    0.66 
  -4  -6  -7    1.68    0.49 
   4   6   7    2.68    0.77 
  -5  -6  -7    4.29    1.05 
  -5  -6  -7    4.80    0.81 
   5   6   7    3.51    0.94 
  -6  -6  -7   -0.19    0.36 
   6   6   7    0.13    0.31 
  -7  -6  -7   14.85    2.15 
   7   6   7   18.00    2.30 
  -8  -6  -7    0.46    0.30 
   8   6   7    1.18    0.44 
  -9  -6  -7    0.22    0.40 
   9   6   7    0.49    0.29 
 -10  -6  -7    0.58    0.59 
  10   6   7    0.04    0.41 
   4  -7  -7    4.45    1.12 
  -4   7   7    6.65    1.29 
   3  -7  -7    3.36    1.06 
  -3   7   7    1.26    0.40 
   2  -7  -7   -0.47    0.27 
  -2   7   7    0.22    0.41 
   1  -7  -7   -0.46    0.19 
  -1   7   7    0.29    0.22 
  -1   7   7   -0.68    0.25 
   0  -7  -7    4.66    1.04 
   0   7   7    6.15    1.10 
   0   7   7    5.15    1.16 
  -1  -7  -7    3.32    0.86 
   1   7   7    3.56    0.89 
   1   7   7    4.79    1.04 
  -2  -7  -7    0.48    0.36 
   2   7   7    0.22    0.18 
   2   7   7    0.30    0.34 
  -3  -7  -7    0.71    0.30 
  -3  -7  -7    0.45    0.42 
   3   7   7    0.16    0.26 
   3   7   7    0.41    0.27 
  -4  -7  -7    1.63    0.67 
   4   7   7    2.47    0.67 
  -5  -7  -7   15.05    2.00 
   5   7   7   12.58    1.88 
  -6  -7  -7    4.45    1.02 
   6   7   7    3.89    1.03 
  -7  -7  -7    4.34    1.05 
   7   7   7    2.92    0.94 
  -8  -7  -7    0.65    0.33 
   8   7   7    0.66    0.44 
  -9  -7  -7    5.86    1.35 
   9   7   7    4.97    1.12 
 -10  -7  -7   -0.70    0.45 
  10   7   7    0.39    0.33 
   3  -8  -7    0.31    0.34 
  -3   8   7    0.26    0.36 
   2  -8  -7    0.46    0.44 
  -2   8   7    1.71    0.53 
   1  -8  -7    4.85    1.18 
  -1   8   7    4.72    1.04 
   0  -8  -7    0.26    0.28 
   0   8   7   -0.18    0.26 
   0   8   7   -0.15    0.22 
  -1  -8  -7    2.79    0.89 
   1   8   7    2.68    0.65 
   1   8   7    4.09    0.98 
  -2  -8  -7    0.25    0.30 
   2   8   7    0.97    0.35 
   2   8   7   -0.22    0.23 
  -3  -8  -7    7.80    1.39 
  -3  -8  -7    7.66    1.09 
   3   8   7    6.82    1.37 
   3   8   7    7.10    1.17 
  -4  -8  -7   27.43    2.12 
   4   8   7   31.09    2.40 
  -5  -8  -7    2.06    0.60 
   5   8   7    1.69    0.67 
  -6  -8  -7    6.57    1.33 
   6   8   7    6.98    1.42 
  -7  -8  -7    2.97    0.79 
   7   8   7    3.77    0.96 
  -8  -8  -7    2.22    0.76 
   8   8   7    1.53    0.49 
  -9  -8  -7    1.28    0.61 
   9   8   7    1.40    0.72 
   2  -9  -7    4.45    0.87 
  -2   9   7    4.23    0.91 
   1  -9  -7    5.28    1.30 
  -1   9   7    5.73    1.30 
   0  -9  -7    0.21    0.27 
   0   9   7   -0.01    0.27 
   0   9   7   -0.07    0.33 
  -1  -9  -7    0.06    0.31 
   1   9   7    0.47    0.31 
   1   9   7   -0.18    0.26 
  -2  -9  -7    1.10    0.43 
   2   9   7    0.31    0.35 
  -3  -9  -7    5.14    1.08 
   3   9   7    5.22    1.22 
  -4  -9  -7   16.69    1.59 
   4   9   7   15.69    2.19 
  -5  -9  -7    2.36    0.82 
   5   9   7    2.55    0.80 
  -6  -9  -7    0.42    0.31 
   6   9   7    0.24    0.30 
  -7  -9  -7    2.05    0.65 
   7   9   7    0.55    0.30 
  -8  -9  -7    2.57    0.82 
   8   9   7    6.04    1.32 
  -9  -9  -7    2.92    0.60 
   9   9   7    3.72    1.01 
  -1  10   7    0.38    0.41 
   0  10   7    0.18    0.37 
   0  10   7    0.28    0.38 
  -1 -10  -7   -0.19    0.26 
   1  10   7    0.74    0.36 
  -2 -10  -7    1.48    0.30 
   2  10   7    3.80    1.04 
  -3 -10  -7    1.27    0.34 
   3  10   7    0.89    0.44 
  -4 -10  -7    2.20    0.62 
   4  10   7    2.76    0.99 
   5  10   7    1.42    0.61 
  -6 -10  -7    5.99    1.22 
   6  10   7    7.57    1.60 
  -7 -10  -7    1.06    0.43 
   7  10   7    0.15    0.30 
  -8 -10  -7    2.33    0.41 
   8  10   7    1.64    0.71 
   1  11   7    3.28    0.64 
   2  11   7   -0.13    0.46 
   3  11   7    6.69    1.44 
   4  11   7    0.09    0.40 
   5  11   7    0.70    0.45 
   6  11   7   -0.50    0.42 
   7  11   7    6.20    1.59 
   2  11  -8   -0.37    0.30 
   1  11  -8    0.73    0.49 
   0  11  -8   10.61    1.94 
  -1  11  -8    1.55    0.67 
   4  10  -8   -0.50    0.33 
   3  10  -8    1.35    0.51 
   2  10  -8   -0.04    0.35 
   1  10  -8    0.00    0.52 
   0  10  -8    8.73    1.60 
  -1  10  -8   16.76    2.36 
  -1  10  -8   13.16    1.93 
  -2  10  -8    2.03    0.62 
  -2  10  -8    2.82    0.62 
  -3  10  -8    3.53    0.89 
  -3  10  -8    3.97    0.81 
   5   9  -8    4.09    0.85 
   4   9  -8   -0.07    0.38 
   3   9  -8    0.81    0.36 
   2   9  -8    2.84    0.81 
   1   9  -8   -0.09    0.29 
   1   9  -8    0.21    0.33 
   0   9  -8    1.07    0.67 
   0   9  -8    0.30    0.43 
  -1   9  -8    0.42    0.34 
  -1   9  -8   -0.10    0.30 
  -2   9  -8    1.09    0.48 
  -2   9  -8    1.60    0.41 
  -3   9  -8    0.02    0.34 
  -3   9  -8   -0.21    0.28 
  -4   9  -8   -0.37    0.35 
  -4   9  -8    0.85    0.37 
  -5   9  -8    3.87    0.81 
   5   8  -8    1.90    0.70 
   4   8  -8    2.38    0.73 
   3   8  -8    0.03    0.31 
   2   8  -8   18.31    1.57 
   2   8  -8   19.22    2.46 
   1   8  -8   -0.06    0.28 
   1   8  -8   -0.30    0.28 
   0   8  -8    9.35    1.53 
   0   8  -8    8.75    1.59 
   0  -8   8   10.78    1.79 
  -1   8  -8    0.90    0.44 
  -1   8  -8   -0.28    0.26 
   1  -8   8    0.54    0.24 
  -2   8  -8    5.24    1.35 
  -2   8  -8    6.49    1.32 
   2  -8   8    7.13    1.43 
  -3   8  -8    1.69    0.49 
  -3   8  -8    2.88    0.86 
   3  -8   8    2.46    0.74 
  -4   8  -8   -0.45    0.37 
  -4   8  -8    0.40    0.29 
   4  -8   8   -0.51    0.23 
  -5   8  -8    3.95    1.05 
  -5   8  -8    8.03    0.78 
   5  -8   8    4.38    0.81 
  -6   8  -8    1.82    0.74 
   6   7  -8    0.18    0.29 
   5   7  -8    6.24    1.32 
   4   7  -8    0.63    0.26 
   3   7  -8    4.09    1.05 
   3   7  -8    5.78    1.10 
   2   7  -8   -0.23    0.25 
   2   7  -8    0.34    0.25 
  -2  -7   8    0.13    0.35 
   1   7  -8    0.49    0.32 
   1   7  -8    0.31    0.29 
  -1  -7   8    0.21    0.37 
   0   7  -8    3.94    0.96 
   0   7  -8    4.55    1.11 
   0  -7   8    4.22    1.10 
  -1   7  -8   -0.08    0.29 
  -1   7  -8    0.38    0.29 
   1  -7   8    0.35    0.32 
  -2   7  -8    7.28    1.41 
   2  -7   8    9.01    1.52 
  -3   7  -8    0.71    0.43 
   3  -7   8    0.61    0.34 
  -4   7  -8    8.15    1.63 
   4  -7   8    5.61    1.16 
  -5   7  -8   -0.01    0.26 
  -5   7  -8    0.91    0.56 
   5  -7   8    1.10    0.42 
  -6   7  -8    0.41    0.51 
  -7   7  -8    1.95    0.58 
   6   6  -8    1.77    0.39 
  -6  -6   8    0.21    0.32 
   5   6  -8    0.92    0.42 
   5   6  -8    1.88    0.52 
  -5  -6   8    1.17    0.38 
   4   6  -8    7.70    1.30 
   4   6  -8    7.02    1.29 
   3   6  -8   11.45    1.13 
   3   6  -8   11.52    1.72 
   3   6  -8   10.13    1.56 
  -3  -6   8   13.33    1.90 
   2   6  -8   20.52    1.70 
   2   6  -8   19.76    1.84 
   2   6  -8   21.23    1.49 
  -2  -6   8   22.51    2.01 
   1   6  -8    2.18    0.76 
  -1  -6   8    1.53    0.61 
   0   6  -8    0.17    0.42 
   0   6  -8    0.14    0.19 
   0  -6   8    0.40    0.39 
  -1   6  -8    6.14    1.28 
   1  -6   8    6.76    1.31 
  -2   6  -8    1.93    0.80 
   2  -6   8    0.99    0.47 
  -3   6  -8    8.41    1.61 
   3  -6   8   10.12    1.62 
  -4   6  -8    3.98    1.22 
   4  -6   8    3.54    0.86 
  -5   6  -8   10.67    1.94 
   5  -6   8    8.14    1.38 
  -6   6  -8   22.19    2.98 
  -7   6  -8    4.01    0.98 
   6   5  -8    1.50    0.60 
   6   5  -8    1.99    0.76 
  -6  -5   8    2.15    0.40 
  -6  -5   8    1.79    0.61 
   5   5  -8   13.33    1.74 
   5   5  -8   14.34    2.01 
   5   5  -8   15.21    1.47 
  -5  -5   8   10.08    1.73 
   4   5  -8   -0.23    0.20 
   4   5  -8   -0.07    0.19 
   4   5  -8    0.25    0.24 
   3   5  -8   -0.21    0.18 
   3   5  -8    0.15    0.20 
   3   5  -8    0.08    0.16 
  -3  -5   8    0.30    0.32 
   2   5  -8   23.58    1.64 
   2   5  -8   21.39    1.79 
  -2  -5   8   23.31    1.89 
   1   5  -8    5.92    0.95 
   1   5  -8    8.11    1.39 
  -1  -5   8    6.25    1.20 
   0   5  -8    4.05    0.77 
   0   5  -8    5.29    1.16 
   0  -5   8    3.81    0.93 
  -1   5  -8    1.02    0.39 
  -1   5  -8    0.31    0.36 
   1  -5   8    0.54    0.36 
  -2   5  -8    0.49    0.31 
  -2   5  -8    0.68    0.49 
   2  -5   8    0.85    0.45 
  -3   5  -8   23.44    2.08 
  -3   5  -8   21.84    1.52 
   3  -5   8   20.30    1.86 
  -4   5  -8    0.01    0.23 
  -4   5  -8   -0.47    0.37 
  -5   5  -8   -0.32    0.32 
  -5   5  -8    0.43    0.28 
   5  -5   8   -0.43    0.21 
  -6   5  -8    3.22    0.99 
  -6   5  -8    3.51    0.79 
   6  -5   8    3.13    0.83 
  -7   5  -8    6.89    1.25 
  -7   5  -8    5.85    1.56 
  -8   5  -8   -0.08    0.53 
   7   4  -8    0.70    0.39 
  -7  -4   8    0.93    0.40 
  -7  -4   8    0.07    0.42 
   6   4  -8    3.72    1.00 
  -6  -4   8    2.21    0.53 
  -6  -4   8    4.48    1.15 
   5   4  -8    1.97    0.73 
   5   4  -8    2.11    0.76 
   5   4  -8    1.46    0.50 
  -5  -4   8    1.12    0.38 
  -5  -4   8    1.26    0.43 
   4   4  -8   38.97    2.43 
   4   4  -8   40.93    2.61 
   4   4  -8   38.87    2.40 
  -4  -4   8   39.32    2.60 
  -4  -4   8   36.87    2.36 
  -4  -4   8   40.84    2.70 
   3   4  -8   23.95    1.86 
   3   4  -8   26.88    1.92 
  -3  -4   8   22.40    1.79 
   2   4  -8   29.60    1.94 
   2   4  -8   29.70    1.96 
  -2  -4   8   29.68    2.11 
   1   4  -8   12.07    1.65 
   1   4  -8   12.42    1.17 
  -1  -4   8   11.23    1.58 
   0   4  -8    0.21    0.21 
   0   4  -8    1.47    0.56 
   0  -4   8    0.21    0.27 
  -1   4  -8   10.69    1.02 
  -1   4  -8   11.59    1.66 
   1  -4   8   12.47    1.67 
  -2   4  -8    2.35    0.77 
  -2   4  -8    2.41    0.65 
   2  -4   8    3.16    0.80 
  -3   4  -8   14.14    1.27 
  -3   4  -8   13.15    1.86 
   3  -4   8   15.34    1.48 
  -4   4  -8    3.25    0.78 
  -4   4  -8    3.17    1.05 
   4  -4   8    3.67    0.89 
  -5   4  -8    1.24    0.59 
  -5   4  -8    0.26    0.29 
   5  -4   8    0.08    0.21 
  -6   4  -8    0.50    0.39 
  -6   4  -8    2.06    0.69 
   6  -4   8    1.00    0.43 
  -7   4  -8   -0.13    0.29 
  -7   4  -8    0.46    0.60 
  -8   4  -8   -0.38    0.44 
  -8   4  -8    0.24    0.30 
   7   3  -8    3.10    0.82 
  -7  -3   8    3.35    0.93 
  -7  -3   8    2.34    0.63 
   6   3  -8    0.51    0.26 
  -6  -3   8    1.55    0.50 
  -6  -3   8   -0.08    0.45 
   5   3  -8    1.77    0.80 
  -5  -3   8    2.93    0.68 
  -5  -3   8    3.54    0.90 
   4   3  -8    3.73    0.88 
   4   3  -8    2.62    0.82 
  -4  -3   8    4.02    1.06 
  -4  -3   8    2.43    0.78 
  -4  -3   8    3.37    0.83 
   3   3  -8   16.91    1.59 
   3   3  -8   15.35    1.80 
  -3  -3   8   15.67    2.08 
  -3  -3   8   17.94    1.55 
   2   3  -8    1.39    0.49 
   2   3  -8    1.65    0.50 
  -2  -3   8    2.89    0.73 
   1   3  -8   14.47    1.63 
   1   3  -8   13.19    1.27 
  -1  -3   8   13.14    1.71 
   0   3  -8    0.94    0.42 
   0   3  -8    2.76    0.87 
   0  -3   8    1.49    0.53 
  -1   3  -8   24.14    1.85 
  -1   3  -8   22.53    1.57 
   1  -3   8   20.73    1.72 
  -2   3  -8    8.24    1.17 
  -2   3  -8    8.33    1.44 
   2  -3   8    8.94    1.40 
  -3   3  -8    0.76    0.42 
  -3   3  -8    1.50    0.65 
   3  -3   8    1.23    0.61 
  -4   3  -8   -0.23    0.25 
  -4   3  -8    1.09    0.58 
   4  -3   8    0.23    0.37 
  -5   3  -8    1.45    0.62 
  -5   3  -8    0.34    0.37 
   5  -3   8    0.00    0.25 
  -6   3  -8    3.61    0.93 
  -6   3  -8    3.76    1.12 
   6  -3   8    4.67    0.92 
  -7   3  -8    0.97    0.59 
  -7   3  -8    1.69    0.66 
   7  -3   8    0.53    0.35 
  -8   3  -8    0.01    0.31 
  -8   3  -8    0.30    0.67 
  -9   3  -8    0.27    0.35 
  -9   3  -8    0.50    0.49 
   7   2  -8    2.00    0.69 
  -7  -2   8    0.35    0.43 
  -7  -2   8    0.63    0.56 
   6   2  -8    2.32    0.87 
  -6  -2   8    1.24    0.52 
  -6  -2   8    1.35    0.69 
   5   2  -8   31.00    2.56 
  -5  -2   8   31.88    2.63 
  -5  -2   8   30.37    2.47 
   4   2  -8    0.20    0.27 
  -4  -2   8    0.30    0.19 
  -4  -2   8    0.19    0.33 
  -4  -2   8    0.04    0.24 
   3   2  -8   14.08    1.90 
  -3  -2   8   12.21    1.79 
  -3  -2   8   13.77    1.31 
   2   2  -8    0.20    0.23 
   2   2  -8   -0.04    0.27 
  -2  -2   8    0.32    0.27 
  -2  -2   8    0.34    0.31 
   1   2  -8    0.69    0.43 
   1   2  -8    0.51    0.37 
  -1  -2   8    1.76    0.60 
   0   2  -8   10.04    1.33 
   0  -2   8    9.69    1.38 
  -1   2  -8    0.63    0.31 
  -1   2  -8   -0.14    0.32 
   1  -2   8    0.20    0.26 
  -2   2  -8   26.34    1.93 
  -2   2  -8   26.40    1.74 
   2  -2   8   26.61    1.90 
  -3   2  -8    0.43    0.37 
  -3   2  -8   -0.15    0.33 
   3  -2   8    0.56    0.41 
  -4   2  -8    5.96    1.07 
  -4   2  -8    4.71    1.08 
   4  -2   8    3.82    0.89 
  -5   2  -8    0.27    0.40 
  -5   2  -8    0.59    0.43 
   5  -2   8   -0.24    0.29 
  -6   2  -8    3.77    1.01 
  -6   2  -8    2.86    0.89 
   6  -2   8    2.62    0.75 
  -7   2  -8    7.20    1.44 
  -7   2  -8    6.39    1.43 
   7  -2   8    6.89    1.16 
  -8   2  -8    4.33    1.24 
  -8   2  -8    4.26    0.96 
  -9   2  -8    0.86    0.51 
  -9   2  -8    1.28    0.56 
   7   1  -8   -0.45    0.30 
  -7  -1   8    1.98    0.52 
  -7  -1   8   -0.24    0.45 
   6   1  -8    0.68    0.44 
  -6  -1   8    0.45    0.50 
  -6  -1   8   -0.28    0.57 
   5   1  -8   -0.12    0.29 
  -5  -1   8    0.41    0.29 
  -5  -1   8   -0.16    0.34 
   4   1  -8   -0.10    0.24 
  -4  -1   8    0.76    0.27 
  -4  -1   8    1.09    0.24 
  -4  -1   8    0.58    0.40 
   3   1  -8    0.76    0.49 
  -3  -1   8    1.18    0.54 
  -3  -1   8    1.04    0.45 
   2   1  -8    0.54    0.31 
  -2  -1   8    0.40    0.44 
  -2  -1   8    0.49    0.27 
   1   1  -8   -0.31    0.16 
   1   1  -8    0.29    0.42 
  -1  -1   8    0.29    0.30 
  -1  -1   8    0.26    0.30 
   0   1  -8   11.98    1.58 
   0   1  -8    8.06    1.19 
   0  -1   8    9.36    1.27 
  -1   1  -8    2.16    0.63 
  -1   1  -8    2.43    0.80 
   1  -1   8    1.79    0.57 
  -2   1  -8   10.51    1.38 
  -2   1  -8   12.67    1.29 
   2  -1   8   11.33    1.52 
  -3   1  -8   14.83    1.43 
  -3   1  -8   15.79    1.50 
   3  -1   8   15.84    1.50 
  -4   1  -8   12.05    1.71 
  -4   1  -8   14.32    1.45 
   4  -1   8   10.82    1.54 
  -5   1  -8    2.12    0.71 
  -5   1  -8    1.03    0.57 
   5  -1   8    1.27    0.59 
  -6   1  -8    3.80    0.97 
  -6   1  -8    5.04    1.14 
   6  -1   8    3.50    0.88 
  -7   1  -8    1.96    0.76 
  -7   1  -8    1.60    0.58 
   7  -1   8    3.10    0.84 
  -8   1  -8   -0.30    0.29 
  -8   1  -8    0.26    0.35 
   8  -1   8    1.16    0.51 
  -9   1  -8    1.79    0.60 
  -9   1  -8    2.18    0.61 
 -10   1  -8    1.19    0.46 
 -10   1  -8    0.74    0.36 
   6   0  -8   -0.21    0.31 
  -6   0   8   -0.33    0.48 
  -6   0   8    0.23    0.42 
   5   0  -8    5.63    1.32 
  -5   0   8   10.63    1.94 
  -5   0   8    3.51    0.97 
   4   0  -8    0.46    0.46 
  -4   0   8    0.99    0.46 
  -4   0   8    0.01    0.37 
   3   0  -8   12.07    1.85 
  -3   0   8   11.17    1.74 
  -3   0   8   12.07    1.12 
   2   0  -8    2.80    0.85 
  -2   0   8    4.98    1.07 
  -2   0   8    2.96    0.66 
   1   0  -8    2.23    0.70 
  -1   0   8    2.67    0.76 
  -1   0   8    1.73    0.56 
   0   0  -8    9.59    1.27 
   0   0  -8    8.82    1.38 
   0   0   8   11.00    1.62 
   0   0   8    9.33    1.28 
  -1   0  -8   -0.08    0.26 
  -1   0  -8    0.21    0.35 
   1   0   8    0.20    0.26 
  -2   0  -8   20.78    1.70 
  -2   0  -8   20.77    1.66 
   2   0   8   20.78    1.64 
  -3   0  -8   41.85    2.44 
  -3   0  -8   43.02    2.41 
   3   0   8   43.53    2.44 
  -4   0  -8    1.41    0.62 
  -4   0  -8    3.14    0.80 
   4   0   8    2.13    0.66 
  -5   0  -8    0.40    0.48 
  -5   0  -8    2.00    0.65 
   5   0   8    2.14    0.69 
  -6   0  -8    2.96    0.89 
  -6   0  -8    2.85    0.89 
   6   0   8    3.34    0.86 
  -7   0  -8    1.79    0.70 
  -7   0  -8    1.07    0.53 
   7   0   8    2.28    0.73 
  -8   0  -8    7.92    1.54 
  -8   0  -8    8.64    1.54 
   8   0   8    8.64    1.38 
  -9   0  -8    1.54    0.50 
  -9   0  -8    1.73    0.58 
 -10   0  -8    3.40    1.00 
 -10   0  -8    4.44    0.82 
   6  -1  -8    1.60    0.57 
  -6   1   8    3.83    1.26 
  -6   1   8    2.24    0.88 
   5  -1  -8   -0.04    0.21 
  -5   1   8   -1.03    0.34 
  -5   1   8    0.33    0.37 
   4  -1  -8    0.35    0.35 
  -4   1   8    0.17    0.38 
   3  -1  -8   -0.28    0.18 
  -3   1   8   -0.03    0.31 
  -3   1   8   -0.34    0.15 
   2  -1  -8    0.01    0.25 
  -2   1   8    0.44    0.25 
  -2   1   8    0.66    0.36 
   1  -1  -8    7.89    1.35 
  -1   1   8    6.94    1.08 
  -1   1   8    7.31    1.34 
   0  -1  -8    9.23    1.30 
   0  -1  -8    8.71    1.36 
   0   1   8   10.38    1.38 
   0   1   8   10.27    1.62 
  -1  -1  -8    3.08    0.78 
  -1  -1  -8    2.34    0.75 
   1   1   8    3.24    0.79 
  -2  -1  -8    3.48    0.88 
   2   1   8    3.24    0.80 
  -3  -1  -8   14.89    1.50 
  -3  -1  -8   12.78    1.28 
   3   1   8   12.67    1.61 
  -4  -1  -8   14.89    1.52 
  -4  -1  -8   16.41    1.46 
   4   1   8   13.10    1.66 
  -5  -1  -8   22.42    1.92 
  -5  -1  -8   22.81    1.79 
   5   1   8   24.47    1.90 
  -6  -1  -8    4.86    1.08 
  -6  -1  -8    4.26    1.09 
   6   1   8    5.80    1.15 
  -7  -1  -8   15.92    2.06 
  -7  -1  -8   12.02    1.87 
   7   1   8   15.58    1.95 
  -8  -1  -8   13.34    1.89 
  -8  -1  -8   14.75    2.24 
   8   1   8   13.77    1.81 
  -9  -1  -8    0.18    0.41 
  -9  -1  -8   -0.14    0.37 
 -10  -1  -8    3.70    0.79 
 -10  -1  -8    7.08    1.55 
   6  -2  -8    0.48    0.51 
  -6   2   8    1.55    0.61 
  -6   2   8   -0.09    0.34 
   5  -2  -8    0.44    0.48 
  -5   2   8   -0.78    0.45 
  -5   2   8    0.46    0.35 
   4  -2  -8    4.57    1.12 
  -4   2   8    6.08    1.31 
   3  -2  -8    2.08    0.83 
  -3   2   8    1.48    0.36 
  -3   2   8    0.05    0.31 
   2  -2  -8    0.68    0.41 
  -2   2   8    0.49    0.37 
  -2   2   8    0.48    0.28 
   1  -2  -8    4.11    0.99 
  -1   2   8    3.58    0.71 
  -1   2   8    3.48    0.99 
   0  -2  -8    8.93    1.47 
   0   2   8    9.26    1.26 
   0   2   8    8.92    1.44 
  -1  -2  -8    0.47    0.36 
  -1  -2  -8    0.10    0.24 
   1   2   8    0.31    0.39 
   1   2   8   -0.06    0.21 
  -2  -2  -8   49.26    2.36 
  -2  -2  -8   48.64    2.65 
   2   2   8   48.02    2.51 
  -3  -2  -8    1.81    0.65 
  -3  -2  -8    1.84    0.61 
   3   2   8    1.38    0.62 
  -4  -2  -8   22.96    1.89 
  -4  -2  -8   23.39    1.68 
   4   2   8   23.72    1.85 
  -5  -2  -8   11.08    1.50 
  -5  -2  -8    9.52    1.53 
   5   2   8   10.24    1.52 
  -6  -2  -8    1.46    0.55 
  -6  -2  -8    1.52    0.74 
   6   2   8    1.26    0.55 
  -7  -2  -8    2.56    0.74 
  -7  -2  -8    1.76    0.69 
   7   2   8    1.52    0.53 
  -8  -2  -8    7.94    1.35 
  -8  -2  -8    7.83    1.63 
   8   2   8    8.39    1.40 
  -9  -2  -8    6.47    1.48 
  -9  -2  -8    7.41    1.32 
   9   2   8    8.38    1.42 
 -10  -2  -8    0.15    0.33 
 -10  -2  -8    0.58    0.35 
   5  -3  -8    0.15    0.44 
  -5   3   8    1.64    0.60 
   4  -3  -8    6.63    1.49 
  -4   3   8    8.32    1.70 
   3  -3  -8    4.24    1.12 
  -3   3   8    4.09    1.14 
   2  -3  -8    3.77    0.95 
  -2   3   8    4.59    1.14 
  -2   3   8    6.28    0.99 
   1  -3  -8    2.25    0.66 
  -1   3   8    1.76    0.61 
  -1   3   8    2.09    0.65 
   0  -3  -8    3.11    0.85 
   0   3   8    2.61    0.84 
   0   3   8    3.19    0.73 
  -1  -3  -8   10.42    1.53 
   1   3   8   12.16    1.71 
   1   3   8   10.01    1.34 
  -2  -3  -8   16.72    1.58 
  -2  -3  -8   16.31    1.36 
   2   3   8   16.14    1.48 
  -3  -3  -8    2.50    0.69 
  -3  -3  -8    1.47    0.59 
   3   3   8    2.84    0.73 
  -4  -3  -8   29.18    2.19 
  -4  -3  -8   28.79    1.81 
   4   3   8   27.87    2.07 
  -5  -3  -8    6.20    1.25 
  -5  -3  -8    5.23    0.97 
   5   3   8    5.83    1.19 
  -6  -3  -8    4.92    1.00 
  -6  -3  -8    5.34    1.21 
   6   3   8    6.27    1.25 
  -7  -3  -8    6.19    1.45 
  -7  -3  -8    5.58    1.13 
   7   3   8    5.61    1.13 
  -8  -3  -8    1.23    0.54 
  -8  -3  -8    0.95    0.42 
   8   3   8    0.70    0.45 
  -9  -3  -8    9.50    1.45 
  -9  -3  -8   12.56    2.13 
   9   3   8   14.47    1.90 
 -10  -3  -8   11.67    2.03 
   5  -4  -8   -0.21    0.33 
  -5   4   8   -0.72    0.41 
   4  -4  -8    2.88    0.92 
  -4   4   8    1.54    0.68 
   3  -4  -8   10.37    1.87 
  -3   4   8    9.29    1.84 
   2  -4  -8   16.71    2.22 
  -2   4   8   16.59    2.30 
  -2   4   8   17.00    1.31 
  -1   4   8    1.43    0.62 
  -1   4   8    0.96    0.37 
   0  -4  -8    3.75    0.88 
   0   4   8    3.53    0.81 
   0   4   8    3.86    1.05 
  -1  -4  -8    0.65    0.39 
   1   4   8    0.88    0.52 
   1   4   8    1.35    0.51 
  -2  -4  -8    5.89    0.98 
  -2  -4  -8    4.66    1.08 
   2   4   8    3.32    0.86 
   2   4   8    3.85    0.88 
  -3  -4  -8    1.46    0.47 
  -3  -4  -8    0.66    0.43 
   3   4   8    0.37    0.27 
  -4  -4  -8    1.08    0.37 
  -4  -4  -8    1.53    0.62 
   4   4   8    0.63    0.30 
  -5  -4  -8   31.76    1.92 
  -5  -4  -8   30.16    2.26 
   5   4   8   33.82    2.36 
  -6  -4  -8    5.04    0.96 
  -6  -4  -8    4.86    1.17 
   6   4   8    4.26    1.03 
  -7  -4  -8   61.60    3.63 
  -7  -4  -8   61.64    2.86 
   7   4   8   62.64    3.41 
  -8  -4  -8    8.94    1.70 
  -8  -4  -8    6.51    1.11 
   8   4   8    7.78    1.40 
  -9  -4  -8   16.07    2.37 
   9   4   8   18.62    2.35 
 -10  -4  -8    0.38    0.64 
   5  -5  -8    3.39    0.91 
  -5   5   8    3.61    1.04 
   4  -5  -8    2.95    0.96 
  -4   5   8    3.07    0.96 
   3  -5  -8    1.98    0.81 
  -3   5   8    2.05    0.73 
   2  -5  -8   -0.89    0.94 
  -2   5   8   -0.27    0.33 
   1  -5  -8    0.95    0.47 
  -1   5   8    1.41    0.58 
  -1   5   8    1.10    0.29 
   0  -5  -8   17.99    1.75 
   0   5   8   18.07    1.82 
   0   5   8   21.01    1.67 
  -1  -5  -8   14.57    1.93 
   1   5   8   14.14    1.37 
   1   5   8   15.19    1.97 
  -2  -5  -8   12.17    1.49 
  -2  -5  -8    9.91    1.54 
   2   5   8   11.90    1.63 
   2   5   8   14.10    1.82 
  -3  -5  -8    0.45    0.34 
  -3  -5  -8    0.22    0.24 
   3   5   8    0.49    0.30 
  -4  -5  -8    2.00    0.52 
  -4  -5  -8    2.60    0.78 
   4   5   8    3.14    0.85 
  -5  -5  -8    8.28    1.43 
  -5  -5  -8    7.02    1.07 
   5   5   8    5.91    1.17 
  -6  -5  -8    1.62    0.67 
  -6  -5  -8    2.01    0.52 
   6   5   8    2.12    0.72 
  -7  -5  -8    1.64    0.63 
  -7  -5  -8    0.33    0.29 
   7   5   8    0.22    0.38 
  -8  -5  -8    0.89    0.55 
   8   5   8    1.44    0.54 
  -9  -5  -8    4.98    1.40 
   9   5   8    3.87    0.88 
 -10  -5  -8   -0.84    0.44 
  10   5   8    0.12    0.30 
   4  -6  -8    4.57    1.25 
  -4   6   8    4.58    1.17 
   3  -6  -8    3.87    1.09 
  -3   6   8    4.09    1.01 
   2  -6  -8   47.03    3.11 
  -2   6   8   52.14    3.42 
   1  -6  -8    2.94    0.86 
  -1   6   8    2.38    0.91 
  -1   6   8    1.84    0.55 
   0  -6  -8   53.32    3.16 
   0   6   8   48.04    2.64 
   0   6   8   46.96    2.97 
  -1  -6  -8    0.15    0.35 
   1   6   8    0.38    0.37 
   1   6   8   -0.18    0.24 
  -2  -6  -8   12.11    1.76 
   2   6   8   11.66    1.68 
   2   6   8   13.26    1.75 
  -3  -6  -8    8.22    1.39 
  -3  -6  -8    7.13    1.04 
   3   6   8    7.31    1.30 
  -4  -6  -8   -0.11    0.26 
  -4  -6  -8    0.16    0.19 
   4   6   8    0.60    0.38 
  -5  -6  -8   64.86    3.46 
  -5  -6  -8   65.79    2.67 
   5   6   8   69.31    3.65 
  -6  -6  -8    2.06    0.88 
   6   6   8    1.07    0.42 
  -7  -6  -8   28.19    2.42 
   7   6   8   31.42    2.51 
  -8  -6  -8    0.64    0.37 
   8   6   8    0.93    0.43 
  -9  -6  -8    0.58    0.54 
   9   6   8    0.74    0.37 
 -10  -6  -8    0.13    0.42 
  10   6   8    0.21    0.37 
   3  -7  -8    0.24    0.39 
  -3   7   8    0.70    0.55 
   2  -7  -8    2.84    0.99 
  -2   7   8    3.75    1.21 
   1  -7  -8   11.32    1.84 
  -1   7   8    9.98    0.97 
  -1   7   8   12.91    2.08 
   0  -7  -8    0.97    0.41 
   0   7   8    2.08    0.60 
   0   7   8    2.46    0.71 
  -1  -7  -8    8.22    1.47 
   1   7   8    8.46    1.50 
   1   7   8    7.02    1.23 
  -2  -7  -8    0.80    0.42 
   2   7   8    1.03    0.40 
   2   7   8    0.68    0.44 
  -3  -7  -8   12.16    1.42 
  -3  -7  -8   12.54    1.82 
   3   7   8   12.02    1.60 
   3   7   8   13.20    1.84 
  -4  -7  -8    5.77    1.23 
   4   7   8    3.35    0.86 
  -5  -7  -8   15.50    2.05 
   5   7   8   13.60    1.97 
  -6  -7  -8    1.87    0.74 
   6   7   8    3.33    1.01 
  -7  -7  -8    3.16    0.95 
   7   7   8    4.76    1.23 
  -8  -7  -8    1.79    0.66 
   8   7   8   -0.19    0.30 
  -9  -7  -8    0.89    0.65 
   9   7   8    0.90    0.34 
   2  -8  -8    2.71    0.89 
  -2   8   8    2.43    0.76 
   1  -8  -8   16.80    2.30 
  -1   8   8   18.21    2.58 
   0  -8  -8    2.78    0.89 
   0   8   8    1.52    0.60 
   0   8   8    1.79    0.58 
  -1  -8  -8    0.20    0.29 
   1   8   8    0.05    0.30 
   1   8   8   -0.43    0.26 
  -2  -8  -8   -0.57    0.25 
   2   8   8    0.11    0.25 
   2   8   8    0.30    0.26 
  -3  -8  -8    0.08    0.25 
  -3  -8  -8   -0.10    0.19 
   3   8   8    0.20    0.24 
   3   8   8    0.37    0.28 
  -4  -8  -8   20.38    1.90 
   4   8   8   21.17    2.04 
  -5  -8  -8    9.58    1.57 
   5   8   8   10.90    1.90 
  -6  -8  -8    1.83    0.70 
   6   8   8    2.14    0.82 
  -7  -8  -8    1.69    0.66 
   7   8   8    0.82    0.37 
  -8  -8  -8    0.88    0.42 
   8   8   8    0.21    0.37 
  -9  -8  -8    1.29    0.44 
   9   8   8   -0.19    0.33 
   1  -9  -8    0.90    0.40 
  -1   9   8    1.19    0.51 
   0  -9  -8    0.79    0.33 
   0   9   8   -0.21    0.34 
   0   9   8    0.39    0.29 
  -1  -9  -8    1.24    0.45 
   1   9   8    1.70    0.69 
   1   9   8    0.94    0.36 
  -2  -9  -8    0.70    0.31 
   2   9   8    1.13    0.46 
  -3  -9  -8   -0.55    0.27 
   3   9   8   -0.01    0.33 
  -4  -9  -8    2.28    0.67 
   4   9   8    2.73    0.87 
  -5  -9  -8    0.44    0.28 
   5   9   8    0.69    0.38 
  -6  -9  -8    1.56    0.62 
   6   9   8    0.59    0.30 
  -7  -9  -8   -0.67    0.30 
   7   9   8    0.16    0.39 
  -8  -9  -8   -0.26    0.43 
   8   9   8   -0.47    0.37 
   0 -10  -8    0.34    0.37 
  -1 -10  -8   -0.74    0.30 
   1  10   8   -0.14    0.33 
  -2 -10  -8   -0.95    0.29 
   2  10   8   -0.33    0.33 
  -3 -10  -8    1.19    0.44 
   3  10   8    1.46    0.52 
  -4 -10  -8    0.84    0.42 
   4  10   8    1.91    0.85 
  -5 -10  -8    1.51    0.56 
   5  10   8    1.04    0.52 
  -6 -10  -8    3.32    0.78 
   6  10   8    3.44    1.21 
  -7 -10  -8    0.15    0.32 
   7  10   8    0.92    0.43 
   8  10   8    0.35    0.34 
   2  11   8    0.63    0.50 
   3  11   8    1.11    0.70 
   4  11   8   -0.22    0.46 
   5  11   8    0.97    0.60 
   6  11   8    0.46    0.50 
   3  10  -9    1.74    0.45 
   2  10  -9    1.12    0.41 
   1  10  -9    4.85    1.33 
   0  10  -9    2.21    0.78 
  -1  10  -9    0.19    0.42 
  -1  10  -9   -0.88    0.35 
  -2  10  -9    0.02    0.40 
  -2  10  -9    0.72    0.47 
  -3  10  -9    0.63    0.39 
   4   9  -9    3.95    1.03 
   3   9  -9   -0.80    0.26 
   2   9  -9    0.55    0.35 
   1   9  -9    1.81    0.67 
   1   9  -9    4.34    1.12 
   0   9  -9   12.33    1.87 
   0   9  -9   10.62    1.82 
  -1   9  -9    2.01    0.53 
  -1   9  -9    1.22    0.68 
  -2   9  -9    1.01    0.45 
  -2   9  -9   -0.09    0.28 
  -3   9  -9    0.59    0.38 
  -3   9  -9    1.42    0.46 
  -4   9  -9   -0.44    0.34 
  -4   9  -9   -0.35    0.39 
   5   8  -9    0.40    0.33 
   4   8  -9    0.92    0.29 
   3   8  -9    0.23    0.35 
   2   8  -9    4.07    1.01 
   2   8  -9    4.71    1.19 
   1   8  -9    0.50    0.27 
   1   8  -9    0.22    0.33 
  -1  -8   9    1.05    0.45 
   0   8  -9   -0.02    0.37 
   0   8  -9    0.56    0.36 
   0  -8   9   -0.50    0.33 
  -1   8  -9    1.46    0.57 
  -1   8  -9    0.95    0.56 
   1  -8   9    1.13    0.47 
  -2   8  -9   -0.02    0.25 
  -2   8  -9    0.92    0.55 
   2  -8   9    1.18    0.38 
  -3   8  -9    3.16    0.84 
  -3   8  -9    4.22    1.00 
   3  -8   9    3.87    1.01 
  -4   8  -9    1.28    0.47 
  -4   8  -9    1.11    0.38 
   4  -8   9    0.64    0.46 
  -5   8  -9    7.37    1.50 
  -5   8  -9    5.65    0.99 
   5  -8   9    7.91    1.34 
   5   7  -9    4.80    1.10 
   4   7  -9    0.09    0.25 
   3   7  -9    1.84    0.53 
   3   7  -9    3.02    0.99 
   2   7  -9    0.05    0.26 
   2   7  -9    0.14    0.24 
  -2  -7   9    0.37    0.29 
   1   7  -9    0.93    0.50 
   1   7  -9    1.30    0.56 
  -1  -7   9    2.89    0.90 
   0   7  -9    5.63    1.14 
   0   7  -9    4.70    1.14 
   0  -7   9    4.26    1.08 
  -1   7  -9    1.24    0.46 
   1  -7   9    1.60    0.67 
  -2   7  -9    3.49    1.01 
   2  -7   9    2.76    0.86 
  -3   7  -9   17.61    2.43 
   3  -7   9   14.24    2.02 
  -4   7  -9    3.71    1.00 
   4  -7   9    6.19    1.30 
  -5   7  -9    0.96    0.61 
   5  -7   9    1.76    0.45 
  -6   7  -9    2.53    0.81 
   5   6  -9    1.49    0.46 
   4   6  -9    0.61    0.26 
   3   6  -9    0.37    0.30 
   3   6  -9    0.53    0.31 
  -3  -6   9   -0.37    0.26 
   2   6  -9    4.60    1.11 
   2   6  -9    5.44    1.13 
  -2  -6   9    4.92    1.16 
   1   6  -9    2.18    0.72 
  -1  -6   9    5.99    1.23 
   0   6  -9   11.78    1.75 
   0  -6   9   11.08    1.73 
  -1   6  -9    0.91    0.61 
   1  -6   9    2.01    0.69 
  -2   6  -9    0.75    0.44 
   2  -6   9    1.59    0.64 
  -3   6  -9   20.15    2.05 
   3  -6   9   19.89    1.91 
  -4   6  -9    4.07    1.22 
   4  -6   9    3.67    0.98 
  -5   6  -9    5.40    1.41 
   5  -6   9    3.83    0.95 
  -6   6  -9    2.59    0.98 
   6  -6   9    3.96    0.93 
  -7   6  -9    0.08    0.49 
   6   5  -9   -0.05    0.29 
  -6  -5   9    1.29    0.47 
  -6  -5   9   -0.16    0.43 
   5   5  -9    3.09    0.78 
   5   5  -9    2.23    0.63 
   5   5  -9    2.65    0.85 
   4   5  -9    2.85    0.78 
   4   5  -9    3.45    0.81 
   4   5  -9    1.41    0.39 
  -4  -5   9    5.41    1.07 
   3   5  -9    7.24    1.20 
   3   5  -9    6.67    1.17 
   3   5  -9   11.22    1.69 
  -3  -5   9    5.34    1.14 
   2   5  -9    1.32    0.53 
   2   5  -9   -0.05    0.40 
  -2  -5   9    1.22    0.50 
   1   5  -9    5.24    0.94 
   1   5  -9    4.80    1.12 
  -1  -5   9    6.59    1.25 
   0   5  -9    5.03    1.13 
   0   5  -9    4.42    0.78 
   0  -5   9    5.20    1.15 
  -1   5  -9    0.86    0.52 
  -1   5  -9    1.77    0.52 
   1  -5   9    3.37    1.01 
  -2   5  -9   13.66    1.96 
  -2   5  -9   15.75    1.29 
   2  -5   9   14.78    2.03 
  -3   5  -9    0.34    0.50 
  -3   5  -9   -0.02    0.21 
   3  -5   9    0.24    0.36 
  -4   5  -9    1.16    0.45 
  -4   5  -9    1.35    0.60 
   4  -5   9   -0.17    0.28 
  -5   5  -9    4.15    0.95 
  -5   5  -9    3.93    1.15 
   5  -5   9    3.64    0.93 
  -6   5  -9    4.93    0.97 
  -6   5  -9    5.83    1.42 
   6  -5   9    6.15    1.10 
  -7   5  -9    5.48    1.37 
  -8   5  -9   11.32    2.13 
   6   4  -9    2.65    0.71 
   6   4  -9    2.13    0.65 
  -6  -4   9    2.48    0.55 
  -6  -4   9    2.22    0.62 
   5   4  -9    0.91    0.48 
   5   4  -9    0.98    0.39 
  -5  -4   9    0.78    0.34 
   4   4  -9   -0.25    0.18 
   4   4  -9   -0.17    0.21 
   4   4  -9    0.33    0.22 
  -4  -4   9   -0.23    0.26 
   3   4  -9   28.08    2.10 
   3   4  -9   27.19    2.02 
  -3  -4   9   27.66    2.08 
   2   4  -9   -0.01    0.18 
   2   4  -9   -0.07    0.18 
  -2  -4   9    0.33    0.29 
   1   4  -9    1.97    0.63 
   1   4  -9    2.79    0.87 
  -1  -4   9    1.94    0.64 
   0   4  -9    6.65    1.27 
   0   4  -9    5.30    0.98 
   0  -4   9    8.17    1.41 
  -1   4  -9   25.44    1.71 
  -1   4  -9   20.46    1.85 
   1  -4   9   23.38    1.97 
  -2   4  -9    4.53    1.13 
  -2   4  -9    3.52    0.77 
   2  -4   9    3.27    0.90 
  -3   4  -9    8.28    1.26 
  -3   4  -9   10.45    1.77 
   3  -4   9    9.02    1.51 
  -4   4  -9    5.95    1.39 
  -4   4  -9    5.79    1.08 
   4  -4   9    5.54    1.15 
  -5   4  -9    1.62    0.56 
  -5   4  -9    2.28    0.81 
   5  -4   9    1.83    0.61 
  -6   4  -9    1.70    0.74 
  -6   4  -9    2.24    0.72 
   6  -4   9    1.80    0.61 
  -7   4  -9    0.18    0.41 
  -7   4  -9   -0.16    0.26 
   7  -4   9   -0.09    0.24 
  -8   4  -9    1.75    1.00 
  -8   4  -9    0.57    0.37 
   6   3  -9    3.65    0.93 
  -6  -3   9    2.98    0.99 
  -6  -3   9    4.95    1.13 
   5   3  -9   -0.64    0.25 
  -5  -3   9    0.27    0.27 
  -5  -3   9    0.30    0.36 
   4   3  -9   14.90    2.06 
   4   3  -9   18.58    1.59 
   4   3  -9   20.07    1.86 
  -4  -3   9   20.15    1.62 
  -4  -3   9   19.27    1.93 
   3   3  -9   23.04    1.90 
   3   3  -9   23.92    2.00 
  -3  -3   9   24.41    2.05 
  -3  -3   9   23.04    1.85 
   2   3  -9   44.48    2.65 
   2   3  -9   39.71    2.46 
  -2  -3   9   42.13    2.59 
   1   3  -9   36.06    2.23 
   1   3  -9   38.50    2.32 
  -1  -3   9   33.28    2.27 
   0   3  -9   32.72    2.29 
   0   3  -9   27.70    1.90 
   0  -3   9   28.44    2.08 
  -1   3  -9    4.56    1.11 
  -1   3  -9    6.03    1.08 
   1  -3   9    6.23    1.19 
  -2   3  -9   15.24    2.00 
  -2   3  -9   16.18    1.43 
   2  -3   9   14.08    1.81 
  -3   3  -9    8.92    1.59 
  -3   3  -9    6.84    1.21 
   3  -3   9    9.64    1.52 
  -4   3  -9    1.83    0.82 
  -4   3  -9    4.28    0.97 
   4  -3   9    3.88    1.02 
  -5   3  -9    4.54    1.19 
  -5   3  -9    4.45    0.99 
   5  -3   9    4.94    1.09 
  -6   3  -9    8.19    1.67 
  -6   3  -9    7.95    1.38 
   6  -3   9    8.45    1.38 
  -7   3  -9    1.56    0.78 
  -7   3  -9    0.64    0.39 
   7  -3   9    0.94    0.40 
  -8   3  -9   -0.55    0.43 
  -8   3  -9   -0.12    0.27 
  -9   3  -9    0.77    0.39 
  -9   3  -9    0.41    0.49 
   6   2  -9    0.73    0.48 
  -6  -2   9    1.38    0.67 
  -6  -2   9    0.16    0.52 
   5   2  -9   12.73    2.05 
  -5  -2   9    9.76    1.78 
  -5  -2   9    9.57    1.83 
   4   2  -9    1.77    0.72 
  -4  -2   9    3.22    0.72 
  -4  -2   9    2.98    0.76 
   3   2  -9    1.22    0.56 
   3   2  -9    1.12    0.44 
  -3  -2   9    3.49    0.92 
  -3  -2   9    2.36    0.65 
   2   2  -9    0.33    0.36 
   2   2  -9   -0.52    0.17 
  -2  -2   9    0.15    0.27 
  -2  -2   9   -0.50    0.18 
   1   2  -9    3.68    0.90 
   1   2  -9    3.82    0.94 
  -1  -2   9    3.58    0.84 
   0   2  -9    3.18    0.80 
   0  -2   9    4.55    1.02 
  -1   2  -9   29.11    2.13 
  -1   2  -9   29.85    2.00 
   1  -2   9   30.46    2.11 
  -2   2  -9   22.02    1.86 
  -2   2  -9   20.38    1.63 
   2  -2   9   19.21    1.70 
  -3   2  -9    0.61    0.43 
  -3   2  -9    0.26    0.45 
   3  -2   9    1.14    0.54 
  -4   2  -9    0.03    0.37 
  -4   2  -9   -0.22    0.27 
   4  -2   9   -0.22    0.21 
  -5   2  -9    1.43    0.61 
  -5   2  -9    0.34    0.56 
   5  -2   9    1.85    0.64 
  -6   2  -9    0.46    0.40 
  -6   2  -9    0.25    0.36 
   6  -2   9    0.37    0.25 
  -7   2  -9   -0.86    0.35 
  -7   2  -9    0.08    0.28 
   7  -2   9    0.01    0.29 
  -8   2  -9    2.83    0.95 
  -8   2  -9    3.23    1.13 
  -9   2  -9    0.28    0.53 
  -9   2  -9   -0.19    0.37 
   6   1  -9   -0.08    0.27 
  -6  -1   9   -0.56    0.37 
  -6  -1   9    0.84    0.47 
   5   1  -9    0.26    0.28 
  -5  -1   9    0.00    0.39 
  -5  -1   9    0.06    0.39 
   4   1  -9    6.38    1.38 
  -4  -1   9    6.77    1.07 
  -4  -1   9    6.16    1.25 
   3   1  -9    1.63    0.76 
  -3  -1   9    1.36    0.46 
  -3  -1   9    1.80    0.59 
   2   1  -9   11.40    1.72 
  -2  -1   9   12.75    1.85 
  -2  -1   9   11.09    1.50 
   1   1  -9    4.69    1.08 
   1   1  -9    4.02    0.93 
  -1  -1   9    4.20    0.91 
  -1  -1   9    4.01    1.01 
   0   1  -9    0.73    0.47 
   0   1  -9    1.26    0.51 
   0  -1   9    0.54    0.33 
  -1   1  -9   20.09    1.73 
  -1   1  -9   18.70    1.62 
   1  -1   9   19.97    1.66 
  -2   1  -9   20.94    1.76 
  -2   1  -9   18.80    1.64 
   2  -1   9   23.21    1.81 
  -3   1  -9   17.17    1.62 
  -3   1  -9   18.23    1.65 
   3  -1   9   18.06    1.66 
  -4   1  -9    0.22    0.30 
  -4   1  -9   -0.22    0.35 
   4  -1   9    0.11    0.31 
  -5   1  -9   11.71    1.75 
  -5   1  -9    9.66    1.57 
   5  -1   9   10.53    1.58 
  -6   1  -9    2.60    0.81 
  -6   1  -9    3.35    0.97 
   6  -1   9    3.20    0.86 
  -7   1  -9    4.39    1.18 
  -7   1  -9    3.80    1.05 
   7  -1   9    5.72    1.17 
  -8   1  -9    4.76    1.19 
  -8   1  -9    3.77    1.05 
   8  -1   9    3.74    0.79 
  -9   1  -9   -0.41    0.48 
  -9   1  -9   -0.22    0.32 
   6   0  -9    2.09    0.90 
  -6   0   9    1.83    0.86 
  -6   0   9    1.38    0.59 
   5   0  -9    0.46    0.40 
  -5   0   9   -1.26    0.40 
   4   0  -9    0.44    0.36 
  -4   0   9    0.40    0.43 
   3   0  -9   -0.10    0.22 
  -3   0   9    0.63    0.34 
  -3   0   9   -0.06    0.19 
   2   0  -9   -0.40    0.25 
  -2   0   9   -0.13    0.37 
  -2   0   9   -0.19    0.19 
   1   0  -9    0.55    0.40 
   1   0  -9    0.16    0.42 
  -1   0   9    1.27    0.45 
  -1   0   9    1.43    0.45 
   0   0  -9    3.14    0.85 
   0   0  -9    3.71    0.87 
   0   0   9    3.43    0.81 
  -1   0  -9    1.71    0.57 
  -1   0  -9    3.11    0.83 
   1   0   9    1.33    0.43 
  -2   0  -9   11.73    1.65 
  -2   0  -9   13.46    1.79 
   2   0   9   10.27    1.46 
  -3   0  -9    3.28    0.93 
  -3   0  -9    1.32    0.54 
   3   0   9    2.13    0.71 
  -4   0  -9    0.60    0.53 
  -4   0  -9    1.27    0.54 
   4   0   9    1.33    0.55 
  -5   0  -9    1.52    0.62 
  -5   0  -9    1.08    0.61 
   5   0   9    1.01    0.59 
  -6   0  -9    7.64    1.41 
  -6   0  -9    9.17    1.67 
   6   0   9    9.62    1.51 
  -7   0  -9    0.31    0.37 
  -7   0  -9    1.88    0.78 
   7   0   9    0.45    0.31 
  -8   0  -9   -0.18    0.28 
  -8   0  -9    1.35    0.65 
   8   0   9    0.89    0.32 
  -9   0  -9    9.42    1.68 
  -9   0  -9    8.01    1.60 
 -10   0  -9    0.65    0.37 
 -10   0  -9    0.08    0.40 
   6  -1  -9    0.41    0.43 
  -6   1   9    0.69    0.50 
   5  -1  -9    0.25    0.46 
  -5   1   9    0.42    0.59 
   4  -1  -9   18.45    2.56 
  -4   1   9   18.37    2.59 
   3  -1  -9    1.71    0.66 
  -3   1   9    4.01    1.17 
  -3   1   9    2.00    0.52 
   2  -1  -9   13.93    1.96 
  -2   1   9   16.78    2.29 
  -2   1   9   13.62    1.24 
   1  -1  -9    0.58    0.41 
  -1   1   9    1.54    0.60 
  -1   1   9    2.86    0.68 
   0  -1  -9    0.24    0.35 
   0  -1  -9    0.67    0.46 
   0   1   9    0.51    0.34 
   0   1   9    0.39    0.27 
  -1  -1  -9    1.33    0.62 
  -1  -1  -9    2.27    0.67 
   1   1   9    2.39    0.74 
  -2  -1  -9    6.26    1.19 
   2   1   9    7.75    1.32 
  -3  -1  -9   30.88    2.10 
  -3  -1  -9   32.55    2.25 
   3   1   9   34.14    2.27 
  -4  -1  -9    2.77    0.79 
  -4  -1  -9    3.49    0.94 
   4   1   9    1.64    0.62 
  -5  -1  -9    4.09    1.08 
  -5  -1  -9    4.61    1.00 
   5   1   9    5.08    1.10 
  -6  -1  -9    1.69    0.84 
  -6  -1  -9    2.37    0.75 
   6   1   9    0.81    0.42 
  -7  -1  -9    3.92    1.12 
  -7  -1  -9    2.77    0.94 
   7   1   9    3.39    0.92 
  -8  -1  -9    4.90    1.22 
  -8  -1  -9    4.72    1.11 
   8   1   9    3.33    0.87 
  -9  -1  -9    2.40    0.73 
  -9  -1  -9    2.75    0.82 
   9   1   9    3.25    0.82 
 -10  -1  -9    1.05    0.47 
 -10  -1  -9    1.02    0.42 
   5  -2  -9    1.18    0.61 
  -5   2   9    0.35    0.47 
   4  -2  -9    2.83    0.90 
  -4   2   9    5.17    1.30 
   3  -2  -9   -0.28    0.21 
  -3   2   9   -0.61    0.33 
   2  -2  -9    0.50    0.33 
  -2   2   9    0.52    0.27 
  -2   2   9    0.28    0.36 
   1  -2  -9    1.61    0.59 
  -1   2   9    1.25    0.53 
  -1   2   9    1.54    0.45 
   0  -2  -9   13.38    1.84 
   0   2   9   16.42    1.48 
   0   2   9   16.17    1.65 
  -1  -2  -9   10.23    1.40 
  -1  -2  -9   11.09    1.68 
   1   2   9    9.44    1.42 
   1   2   9    9.41    1.54 
  -2  -2  -9    0.85    0.54 
  -2  -2  -9    1.35    0.52 
   2   2   9    1.65    0.60 
  -3  -2  -9    4.11    0.96 
  -3  -2  -9    2.97    0.88 
   3   2   9    3.92    0.93 
  -4  -2  -9   11.23    1.61 
  -4  -2  -9    7.82    1.37 
   4   2   9    8.43    1.43 
  -5  -2  -9    6.71    1.19 
  -5  -2  -9    5.87    1.32 
   5   2   9    7.07    1.27 
  -6  -2  -9   -0.06    0.31 
  -6  -2  -9    0.36    0.39 
   6   2   9   -0.19    0.24 
  -7  -2  -9    3.47    1.08 
  -7  -2  -9    4.02    1.07 
   7   2   9    4.18    1.21 
  -8  -2  -9    1.30    0.44 
  -8  -2  -9    1.10    0.57 
   8   2   9    2.52    0.75 
  -9  -2  -9    3.19    0.81 
  -9  -2  -9    4.39    1.31 
   9   2   9    2.15    0.64 
 -10  -2  -9    1.46    0.34 
 -10  -2  -9    0.06    0.41 
   5  -3  -9    0.04    0.44 
  -5   3   9    1.31    0.79 
   4  -3  -9    0.94    0.51 
  -4   3   9    0.11    0.50 
   3  -3  -9    7.25    1.58 
  -3   3   9    5.79    1.31 
  -2   3   9    1.22    0.35 
  -2   3   9    1.90    0.80 
   1  -3  -9    0.64    0.34 
  -1   3   9    0.18    0.21 
  -1   3   9   -0.07    0.30 
   0  -3  -9    0.07    0.27 
   0   3   9    0.05    0.25 
   0   3   9    0.63    0.49 
  -1  -3  -9    0.73    0.34 
  -1  -3  -9    0.04    0.36 
   1   3   9   -0.27    0.30 
   1   3   9   -0.08    0.16 
  -2  -3  -9    0.97    0.49 
  -2  -3  -9    0.99    0.55 
   2   3   9    1.62    0.61 
  -3  -3  -9    1.03    0.53 
  -3  -3  -9    0.51    0.34 
   3   3   9    1.21    0.52 
  -4  -3  -9   -0.14    0.23 
  -4  -3  -9    0.51    0.37 
   4   3   9   -0.12    0.21 
  -5  -3  -9   15.48    2.03 
  -5  -3  -9   14.64    1.40 
   5   3   9   12.74    1.81 
  -6  -3  -9    1.36    0.46 
  -6  -3  -9    1.86    0.80 
   6   3   9    1.00    0.49 
  -7  -3  -9    1.58    0.72 
  -7  -3  -9    2.59    0.79 
   7   3   9    3.26    0.95 
  -8  -3  -9    3.84    0.93 
  -8  -3  -9    3.33    1.03 
   8   3   9    3.81    0.99 
  -9  -3  -9    3.38    1.04 
  -9  -3  -9    1.75    0.45 
   9   3   9    2.02    0.53 
 -10  -3  -9    9.44    1.96 
   4  -4  -9    3.12    0.92 
  -4   4   9    1.41    0.71 
   3  -4  -9    4.73    1.27 
  -3   4   9    3.40    1.08 
   2  -4  -9    3.94    1.00 
  -2   4   9    4.35    1.24 
  -2   4   9    4.27    0.84 
   1  -4  -9   25.91    2.24 
  -1   4   9   21.52    2.07 
  -1   4   9   24.55    1.78 
   0  -4  -9    5.09    1.14 
   0   4   9    5.81    1.37 
   0   4   9    5.03    0.96 
  -1  -4  -9   10.91    1.71 
   1   4   9   10.98    1.70 
   1   4   9    9.97    1.46 
  -2  -4  -9   40.34    2.30 
  -2  -4  -9   39.35    2.62 
   2   4   9   42.45    2.59 
   2   4   9   40.06    2.54 
  -3  -4  -9   35.63    2.08 
  -3  -4  -9   35.64    2.49 
   3   4   9   38.88    2.51 
  -4  -4  -9    7.38    1.24 
  -4  -4  -9    6.57    1.33 
   4   4   9    7.07    1.30 
  -5  -4  -9   37.64    2.61 
  -5  -4  -9   40.03    2.28 
   5   4   9   37.09    2.59 
  -6  -4  -9   38.70    2.81 
  -6  -4  -9   42.57    2.38 
   6   4   9   39.87    2.75 
  -7  -4  -9    2.99    1.04 
  -7  -4  -9    2.49    0.72 
   7   4   9    3.67    1.08 
  -8  -4  -9    0.98    0.29 
  -8  -4  -9    1.86    0.74 
   8   4   9    1.57    0.59 
  -9  -4  -9    4.00    1.31 
   9   4   9    5.70    1.17 
 -10  -4  -9    7.76    1.91 
  10   4   9    7.35    1.10 
   4  -5  -9   -0.70    0.41 
  -4   5   9    0.43    0.41 
   3  -5  -9    2.49    0.92 
  -3   5   9    1.16    0.43 
   2  -5  -9    7.70    1.57 
   1  -5  -9   29.06    2.40 
  -1   5   9   25.47    2.31 
  -1   5   9   28.42    1.96 
   0  -5  -9   20.63    1.97 
   0   5   9   19.31    1.64 
   0   5   9   20.20    1.94 
  -1  -5  -9   13.74    2.01 
   1   5   9   12.21    1.91 
   1   5   9   14.26    1.85 
  -2  -5  -9    8.14    1.30 
  -2  -5  -9    8.53    1.53 
   2   5   9    8.47    1.45 
   2   5   9    6.66    1.24 
  -3  -5  -9   15.91    2.11 
  -3  -5  -9   13.86    1.29 
   3   5   9   18.17    1.69 
  -4  -5  -9    3.57    0.83 
  -4  -5  -9    3.60    0.96 
   4   5   9    2.95    0.84 
  -5  -5  -9    3.00    0.84 
  -5  -5  -9    2.54    0.63 
   5   5   9    2.34    0.80 
  -6  -5  -9   10.55    1.09 
  -6  -5  -9   12.57    1.94 
   6   5   9   11.20    1.76 
  -7  -5  -9    2.24    0.65 
  -7  -5  -9    5.13    1.28 
   7   5   9    1.86    0.56 
  -8  -5  -9    6.65    1.53 
   8   5   9    8.25    1.58 
  -9  -5  -9    2.28    0.94 
   9   5   9    1.43    0.51 
 -10  -5  -9   18.88    2.83 
  10   5   9   18.38    2.39 
   3  -6  -9    0.33    0.49 
  -3   6   9    0.68    0.41 
   2  -6  -9    1.74    0.63 
  -2   6   9    1.13    0.55 
   1  -6  -9   14.93    2.23 
  -1   6   9   12.29    1.19 
  -1   6   9   13.04    2.05 
   0  -6  -9   11.62    1.85 
   0   6   9    8.61    1.58 
   0   6   9    9.10    1.41 
  -1  -6  -9    0.11    0.36 
   1   6   9    0.00    0.29 
   1   6   9    0.31    0.33 
  -2  -6  -9    8.10    1.44 
  -2  -6  -9    8.09    1.31 
   2   6   9   10.30    1.64 
   2   6   9    9.46    1.52 
  -3  -6  -9    8.15    1.24 
  -3  -6  -9    6.82    1.35 
   3   6   9    7.79    1.42 
  -4  -6  -9    0.80    0.41 
  -4  -6  -9    1.53    0.43 
   4   6   9    0.85    0.41 
  -5  -6  -9   36.31    2.05 
  -5  -6  -9   37.66    2.68 
   5   6   9   34.79    2.63 
  -6  -6  -9    2.49    0.80 
  -6  -6  -9    2.84    0.85 
   6   6   9    3.89    1.01 
  -7  -6  -9    2.94    0.97 
   7   6   9    1.93    0.64 
  -8  -6  -9   -0.23    0.46 
   8   6   9   -0.51    0.25 
  -9  -6  -9    0.81    0.57 
   9   6   9    0.51    0.37 
 -10  -6  -9   -0.64    0.41 
  10   6   9    1.09    0.35 
   3  -7  -9   -0.33    0.33 
   2  -7  -9    3.97    1.16 
  -2   7   9    4.83    1.20 
   1  -7  -9   15.66    2.36 
  -1   7   9   14.39    2.17 
   0  -7  -9    4.10    1.05 
   0   7   9    4.25    1.15 
   0   7   9    4.69    0.94 
  -1  -7  -9   23.18    2.11 
   1   7   9   22.12    1.99 
   1   7   9   23.03    1.91 
  -2  -7  -9    2.50    0.76 
   2   7   9    5.41    1.17 
   2   7   9    2.96    0.90 
  -3  -7  -9    0.87    0.37 
  -3  -7  -9    1.66    0.61 
   3   7   9    0.92    0.41 
  -4  -7  -9    1.72    0.77 
   4   7   9    1.93    0.68 
  -5  -7  -9   -0.27    0.28 
   5   7   9    0.34    0.43 
  -6  -7  -9    2.37    0.60 
   6   7   9    0.35    0.40 
  -7  -7  -9    8.78    1.72 
   7   7   9    7.88    1.66 
  -8  -7  -9    4.07    1.14 
   8   7   9    4.98    1.19 
  -9  -7  -9    0.15    0.42 
   9   7   9   -0.64    0.36 
   2  -8  -9    1.05    0.41 
  -2   8   9    0.76    0.45 
   1  -8  -9    0.94    0.43 
  -1   8   9    0.33    0.36 
   0  -8  -9    4.24    1.13 
   0   8   9    3.83    0.93 
   0   8   9    3.66    0.66 
  -1  -8  -9   -0.10    0.40 
   1   8   9   -0.20    0.30 
   1   8   9    0.27    0.34 
  -2  -8  -9   -0.55    0.26 
   2   8   9   -0.42    0.24 
   2   8   9   -0.47    0.27 
  -3  -8  -9    0.91    0.41 
  -3  -8  -9    0.82    0.52 
   3   8   9    1.66    0.57 
   3   8   9    0.36    0.43 
  -4  -8  -9    1.61    0.66 
   4   8   9    1.43    0.70 
  -5  -8  -9    0.39    0.44 
   5   8   9    0.66    0.50 
  -6  -8  -9    0.69    0.49 
   6   8   9    0.58    0.37 
  -7  -8  -9    3.39    1.04 
   7   8   9    4.52    1.14 
  -8  -8  -9    1.13    0.76 
   8   8   9   -0.02    0.36 
  -9  -8  -9    0.12    0.45 
   9   8   9    0.75    0.35 
   0  -9  -9    0.90    0.48 
   0   9   9    3.08    0.61 
  -1  -9  -9    0.50    0.39 
   1   9   9    1.37    0.38 
   1   9   9    0.55    0.42 
  -2  -9  -9    0.86    0.43 
   2   9   9    1.65    0.61 
  -3  -9  -9   10.04    1.78 
   3   9   9    6.62    1.48 
  -4  -9  -9   19.06    1.95 
   4   9   9   17.93    2.47 
  -5  -9  -9    2.17    0.69 
   5   9   9    0.79    0.48 
  -6  -9  -9    3.56    0.98 
   6   9   9    1.87    0.81 
  -7  -9  -9    0.88    0.66 
   7   9   9   -0.10    0.33 
  -8  -9  -9    1.75    0.39 
   8   9   9    1.38    0.46 
  -1 -10  -9    0.22    0.32 
   1  10   9   -0.98    0.35 
  -2 -10  -9    3.55    1.00 
   2  10   9    4.34    1.04 
  -3 -10  -9    2.78    0.65 
   3  10   9    1.86    0.74 
  -4 -10  -9    2.62    0.72 
   4  10   9    1.28    0.52 
  -5 -10  -9    0.02    0.34 
   5  10   9    0.49    0.46 
  -6 -10  -9   -0.40    0.33 
   6  10   9   -0.11    0.49 
  -7 -10  -9    0.07    0.38 
   7  10   9    1.14    0.47 
   4  11   9    1.30    0.68 
   1  10 -10    1.08    0.37 
   0  10 -10    5.00    1.20 
  -1  10 -10    8.98    1.65 
  -1  10 -10    8.37    1.49 
   3   9 -10   -0.73    0.32 
   2   9 -10   -0.09    0.30 
   1   9 -10    2.37    0.64 
   0   9 -10    0.06    0.35 
   0   9 -10    0.21    0.39 
  -1   9 -10   10.92    1.89 
  -1   9 -10    9.13    1.63 
   1  -9  10   10.51    1.89 
  -2   9 -10   -0.46    0.33 
  -2   9 -10    0.34    0.39 
   2  -9  10   -0.32    0.28 
  -3   9 -10    4.17    1.17 
  -3   9 -10    5.58    1.22 
   3  -9  10    4.81    1.20 
  -4   9 -10    1.07    0.38 
   4   8 -10    1.28    0.41 
   3   8 -10    0.47    0.32 
   2   8 -10   -0.52    0.29 
   2   8 -10    0.31    0.43 
   1   8 -10    0.03    0.33 
   1   8 -10   -0.02    0.30 
  -1  -8  10    1.09    0.48 
   0   8 -10    1.21    0.40 
   0   8 -10   -0.22    0.26 
   0  -8  10    0.33    0.31 
  -1   8 -10    2.91    0.98 
  -1   8 -10    4.57    1.15 
   1  -8  10    2.02    0.64 
  -2   8 -10    3.80    1.01 
  -2   8 -10    3.65    1.04 
   2  -8  10    4.35    1.09 
  -3   8 -10    4.52    1.14 
  -3   8 -10    6.72    1.40 
   3  -8  10    7.21    1.51 
  -4   8 -10    1.69    0.83 
  -4   8 -10    3.19    0.98 
   4  -8  10    2.62    0.79 
  -5   8 -10    3.74    0.68 
  -5   8 -10    3.43    1.08 
   5  -8  10    2.16    0.53 
   4   7 -10    0.40    0.33 
   3   7 -10   -0.29    0.29 
   3   7 -10    0.14    0.27 
   2   7 -10    6.14    1.22 
   2   7 -10    5.36    1.32 
  -2  -7  10    5.49    1.38 
   1   7 -10    3.43    0.93 
   1   7 -10    1.60    0.72 
  -1  -7  10    2.06    0.69 
   0   7 -10   17.93    1.79 
   0  -7  10   18.32    2.39 
  -1   7 -10    1.99    0.65 
   1  -7  10    1.49    0.58 
  -2   7 -10    1.15    0.45 
   2  -7  10   -0.76    0.23 
  -3   7 -10   -0.98    0.33 
   3  -7  10    0.21    0.27 
  -4   7 -10    0.54    0.45 
   4  -7  10   -0.41    0.27 
  -5   7 -10    0.75    0.45 
   5  -7  10    0.14    0.24 
  -6   7 -10    1.51    0.54 
   5   6 -10    1.04    0.41 
   4   6 -10   -0.04    0.30 
   4   6 -10    0.82    0.35 
   3   6 -10   -0.21    0.28 
   3   6 -10   -0.28    0.25 
  -3  -6  10   -0.91    0.27 
   2   6 -10    4.44    1.12 
   2   6 -10    4.66    1.10 
  -2  -6  10    3.02    0.86 
   1   6 -10    0.10    0.27 
  -1  -6  10   -0.22    0.33 
   0   6 -10    0.00    0.35 
   0  -6  10   -0.38    0.28 
  -1   6 -10    2.19    0.76 
   1  -6  10    1.26    0.64 
  -2   6 -10    0.83    0.54 
   2  -6  10    0.53    0.33 
  -3   6 -10    4.31    1.31 
   3  -6  10    2.84    0.96 
  -4   6 -10   14.19    2.24 
   4  -6  10   15.27    2.14 
  -5   6 -10    0.00    0.41 
   5  -6  10   -0.17    0.28 
  -6   6 -10    2.03    0.61 
   6  -6  10    1.52    0.41 
  -7   6 -10    0.37    0.44 
   5   5 -10    5.71    1.15 
   5   5 -10    5.99    1.16 
   4   5 -10    2.38    0.64 
   4   5 -10    1.77    0.48 
   4   5 -10    1.32    0.41 
  -4  -5  10    2.58    0.63 
   3   5 -10    0.53    0.38 
   3   5 -10    1.40    0.48 
  -3  -5  10    0.25    0.34 
   2   5 -10   10.74    1.55 
   2   5 -10    9.03    1.54 
  -2  -5  10    8.94    1.54 
   1   5 -10    0.72    0.39 
   1   5 -10    0.31    0.27 
  -1  -5  10    0.48    0.30 
   0   5 -10    1.17    0.60 
   0   5 -10    1.71    0.46 
   0  -5  10    0.87    0.46 
  -1   5 -10   28.38    1.86 
  -1   5 -10   31.42    2.44 
   1  -5  10   28.03    2.33 
  -2   5 -10    0.74    0.38 
  -2   5 -10    1.47    0.66 
   2  -5  10    0.17    0.29 
  -3   5 -10   42.94    2.99 
  -3   5 -10   38.99    2.23 
   3  -5  10   42.06    2.83 
  -4   5 -10   17.67    1.53 
  -4   5 -10   16.52    2.41 
   4  -5  10   21.46    2.54 
  -5   5 -10    3.63    1.07 
   5  -5  10    3.70    0.92 
  -6   5 -10    5.20    1.29 
   6  -5  10    4.05    0.97 
  -7   5 -10   11.63    2.17 
   5   4 -10    4.73    1.07 
   5   4 -10    4.56    1.20 
  -5  -4  10    3.04    0.89 
   4   4 -10    2.77    0.60 
   4   4 -10    2.94    0.76 
   4   4 -10    3.77    0.91 
  -4  -4  10    5.06    1.07 
   3   4 -10    2.15    0.61 
   3   4 -10    1.58    0.62 
  -3  -4  10    3.35    0.76 
   2   4 -10   21.59    1.83 
  -2  -4  10   17.81    1.73 
   1   4 -10    7.15    1.23 
   1   4 -10    8.43    1.56 
  -1  -4  10    8.06    1.40 
   0   4 -10   45.58    2.51 
   0   4 -10   41.65    2.73 
   0  -4  10   43.08    2.78 
  -1   4 -10   20.97    1.64 
  -1   4 -10   20.76    1.95 
   1  -4  10   18.89    1.80 
  -2   4 -10    0.48    0.35 
  -2   4 -10   -0.04    0.42 
   2  -4  10    0.69    0.47 
  -3   4 -10    3.99    0.89 
  -3   4 -10    2.55    0.86 
   3  -4  10    2.45    0.84 
  -4   4 -10    0.89    0.51 
  -4   4 -10    1.35    0.50 
   4  -4  10    0.80    0.45 
  -5   4 -10    4.99    1.34 
  -5   4 -10    6.02    1.23 
   5  -4  10    4.65    1.07 
  -6   4 -10   -0.32    0.41 
  -6   4 -10    0.69    0.44 
   6  -4  10    0.10    0.28 
  -7   4 -10    0.44    0.37 
  -7   4 -10    0.12    0.41 
   7  -4  10    0.18    0.26 
  -8   4 -10    3.89    1.10 
  -8   4 -10    1.51    0.38 
   5   3 -10    0.42    0.31 
  -5  -3  10    0.12    0.35 
   4   3 -10    4.78    1.11 
   4   3 -10    2.09    0.66 
  -4  -3  10    2.01    0.59 
  -4  -3  10    3.70    0.94 
   3   3 -10    2.49    0.79 
   3   3 -10    4.31    1.02 
  -3  -3  10    3.44    0.76 
   2   3 -10   75.18    3.64 
   2   3 -10   77.99    3.72 
  -2  -3  10   81.77    3.85 
   1   3 -10   -0.06    0.21 
  -1  -3  10   -0.20    0.19 
   0   3 -10   57.70    2.97 
   0   3 -10   57.50    3.24 
   0  -3  10   57.06    3.13 
  -1   3 -10    7.56    1.28 
  -1   3 -10    6.53    1.32 
   1  -3  10    6.47    1.25 
  -2   3 -10   12.78    1.84 
  -2   3 -10   14.36    1.43 
   2  -3  10   15.08    2.02 
  -3   3 -10   11.66    1.65 
  -3   3 -10   14.93    2.09 
   3  -3  10   13.69    1.90 
  -4   3 -10    2.85    0.94 
  -4   3 -10    2.79    0.83 
   4  -3  10    3.70    0.96 
  -5   3 -10   57.83    3.18 
  -5   3 -10   55.34    3.43 
   5  -3  10   51.80    3.09 
  -6   3 -10    0.20    0.29 
  -6   3 -10    0.47    0.39 
   6  -3  10   -0.23    0.24 
  -7   3 -10   15.46    2.12 
  -7   3 -10   14.40    2.47 
   7  -3  10   17.16    1.67 
  -8   3 -10    1.86    0.63 
  -8   3 -10    1.01    0.39 
   5   2 -10    2.11    0.70 
  -5  -2  10    3.09    0.80 
   4   2 -10    1.32    0.57 
  -4  -2  10    2.00    0.68 
  -4  -2  10    1.03    0.23 
   3   2 -10   12.73    1.95 
   3   2 -10   10.06    1.64 
  -3  -2  10   13.31    2.12 
  -3  -2  10    8.50    1.36 
   2   2 -10    0.84    0.36 
   2   2 -10    2.75    0.83 
  -2  -2  10    1.30    0.51 
   1   2 -10   21.73    1.88 
   1   2 -10   27.49    2.10 
  -1  -2  10   25.88    2.01 
   0   2 -10   19.13    1.71 
   0  -2  10   21.52    1.83 
  -1   2 -10    1.31    0.68 
  -1   2 -10    2.92    0.87 
   1  -2  10    4.11    1.00 
  -2   2 -10   11.59    1.79 
  -2   2 -10   10.77    1.53 
   2  -2  10   10.43    1.60 
  -3   2 -10   26.29    2.03 
  -3   2 -10   26.71    2.20 
   3  -2  10   26.94    2.15 
  -4   2 -10   -0.11    0.29 
  -4   2 -10   -0.69    0.30 
   4  -2  10    0.25    0.26 
  -5   2 -10   -0.17    0.31 
  -5   2 -10    0.72    0.50 
   5  -2  10    0.25    0.37 
  -6   2 -10    0.53    0.39 
  -6   2 -10    0.49    0.68 
   6  -2  10    0.90    0.41 
  -7   2 -10   -0.55    0.28 
  -7   2 -10    0.40    0.57 
   7  -2  10    0.79    0.33 
  -8   2 -10    2.50    0.74 
  -8   2 -10    1.23    0.75 
   8  -2  10    1.78    0.53 
  -9   2 -10   -0.04    0.39 
  -9   2 -10   -0.64    0.36 
   5   1 -10    0.77    0.50 
  -5  -1  10    2.22    0.75 
   4   1 -10   13.95    2.24 
  -4  -1  10   12.90    2.10 
   3   1 -10    2.61    0.92 
  -3  -1  10    5.39    1.22 
  -3  -1  10    3.56    0.80 
   2   1 -10    1.81    0.66 
   2   1 -10    2.18    0.86 
  -2  -1  10    2.84    0.74 
  -2  -1  10    1.08    0.42 
   1   1 -10    5.17    1.13 
   1   1 -10    4.58    1.12 
  -1  -1  10    5.32    1.05 
   0   1 -10    1.18    0.53 
   0   1 -10    1.75    0.68 
   0  -1  10    2.36    0.65 
  -1   1 -10    6.10    1.19 
  -1   1 -10    8.51    1.53 
   1  -1  10    7.44    1.30 
  -2   1 -10   21.91    1.88 
  -2   1 -10   23.66    1.98 
   2  -1  10   24.32    1.94 
  -3   1 -10    0.24    0.33 
  -3   1 -10   -0.31    0.28 
   3  -1  10    0.48    0.41 
  -4   1 -10    8.55    1.44 
  -4   1 -10    8.78    1.55 
   4  -1  10    8.96    1.53 
  -5   1 -10    3.15    1.00 
  -5   1 -10    2.74    0.80 
   5  -1  10    1.74    0.70 
  -6   1 -10   16.57    2.19 
  -6   1 -10   17.38    2.35 
   6  -1  10   15.62    2.04 
  -7   1 -10   -0.16    0.31 
  -7   1 -10    0.61    0.49 
   7  -1  10   -0.09    0.27 
  -8   1 -10    2.77    0.79 
  -8   1 -10    3.63    0.98 
   8  -1  10    3.63    0.91 
  -9   1 -10    2.90    0.91 
  -9   1 -10    2.76    0.95 
   5   0 -10    1.83    0.54 
  -5   0  10    2.32    0.89 
   4   0 -10   -0.50    0.24 
  -4   0  10   -0.02    0.38 
   3   0 -10    2.40    0.80 
  -3   0  10    3.85    1.12 
  -3   0  10    2.09    0.55 
   2   0 -10    0.07    0.37 
  -2   0  10    0.12    0.39 
  -2   0  10    0.84    0.34 
   1   0 -10    2.75    0.83 
   1   0 -10    3.34    0.97 
  -1   0  10    4.38    1.05 
  -1   0  10    3.05    0.77 
   0   0 -10   17.36    1.64 
   0   0 -10   14.50    1.93 
   0   0  10   16.74    1.57 
  -1   0 -10    0.64    0.43 
  -1   0 -10    1.06    0.53 
   1   0  10    0.02    0.19 
  -2   0 -10    2.16    0.78 
  -2   0 -10    3.22    0.87 
   2   0  10    3.08    0.82 
  -3   0 -10   46.71    2.74 
  -3   0 -10   44.60    2.73 
   3   0  10   45.48    2.76 
  -4   0 -10    1.59    0.68 
  -4   0 -10    3.75    0.98 
   4   0  10    2.30    0.78 
  -5   0 -10    3.06    1.02 
  -5   0 -10    3.03    0.91 
   5   0  10    2.83    0.83 
  -6   0 -10    1.15    0.55 
  -6   0 -10    0.42    0.40 
   6   0  10    0.60    0.45 
  -7   0 -10    2.78    0.78 
  -7   0 -10    1.34    0.67 
   7   0  10    1.97    0.69 
  -8   0 -10    1.44    0.64 
  -8   0 -10    0.91    0.51 
   8   0  10    0.08    0.26 
  -9   0 -10    2.84    0.83 
  -9   0 -10    3.80    1.10 
   5  -1 -10    0.56    0.38 
  -5   1  10   -0.27    0.48 
   4  -1 -10    4.04    1.02 
  -4   1  10    2.97    1.10 
   3  -1 -10    0.23    0.30 
  -3   1  10   -0.19    0.40 
   2  -1 -10    0.53    0.35 
  -2   1  10    0.56    0.34 
  -2   1  10    0.55    0.31 
   1  -1 -10    4.80    1.22 
  -1   1  10    5.37    1.09 
  -1   1  10    3.39    0.99 
   0  -1 -10   14.18    1.97 
   0  -1 -10   18.74    1.73 
   0   1  10   18.20    1.86 
   0   1  10   20.03    1.73 
  -1  -1 -10    5.60    1.05 
  -1  -1 -10    5.10    1.17 
   1   1  10    5.27    1.02 
  -2  -1 -10    2.49    0.86 
   2   1  10    2.68    0.78 
  -3  -1 -10   17.16    1.72 
  -3  -1 -10   16.39    1.60 
   3   1  10   18.39    1.72 
  -4  -1 -10   -0.61    0.21 
  -4  -1 -10    0.17    0.21 
   4   1  10    0.29    0.42 
  -5  -1 -10    1.99    0.79 
  -5  -1 -10    1.05    0.45 
   5   1  10    0.93    0.51 
  -6  -1 -10    0.49    0.33 
  -6  -1 -10    0.99    0.59 
   6   1  10    0.52    0.36 
  -7  -1 -10    0.29    0.45 
  -7  -1 -10    0.02    0.30 
   7   1  10    0.40    0.25 
  -8  -1 -10    0.67    0.44 
   8   1  10    0.15    0.26 
  -9  -1 -10    0.34    0.32 
  -9  -1 -10    1.13    0.44 
   9   1  10   -0.69    0.27 
 -10  -1 -10    3.75    0.69 
 -10  -1 -10    2.98    0.84 
   5  -2 -10    2.57    0.80 
  -5   2  10    2.10    0.62 
   4  -2 -10    0.46    0.34 
  -4   2  10   -0.35    0.50 
  -3   2  10    3.42    1.25 
   2  -2 -10    0.44    0.45 
  -2   2  10    0.01    0.46 
  -2   2  10    0.18    0.22 
   1  -2 -10    0.23    0.40 
  -1   2  10    0.93    0.30 
  -1   2  10    0.64    0.57 
   0  -2 -10    2.62    0.91 
   0  -2 -10    3.10    1.00 
   0   2  10    2.04    0.74 
   0   2  10    1.78    0.61 
  -1  -2 -10    0.52    0.31 
  -1  -2 -10    0.33    0.25 
   1   2  10    0.53    0.32 
  -2  -2 -10   11.17    1.75 
  -2  -2 -10   10.57    1.45 
   2   2  10   13.57    1.81 
  -3  -2 -10    0.86    0.46 
  -3  -2 -10   -0.18    0.35 
   3   2  10   -0.17    0.19 
  -4  -2 -10    1.67    0.60 
  -4  -2 -10    1.70    0.71 
   4   2  10    1.64    0.64 
  -5  -2 -10    0.46    0.31 
  -5  -2 -10    0.22    0.36 
   5   2  10    1.32    0.60 
  -6  -2 -10    0.41    0.51 
  -6  -2 -10    0.67    0.33 
   6   2  10   -0.12    0.25 
  -7  -2 -10   15.64    2.14 
  -7  -2 -10   12.09    2.07 
   7   2  10   13.99    1.97 
  -8  -2 -10    0.78    0.38 
  -8  -2 -10    0.02    0.36 
   8   2  10    0.67    0.29 
  -9  -2 -10    0.59    0.46 
  -9  -2 -10    0.48    0.38 
   9   2  10    0.75    0.35 
 -10  -2 -10    1.42    0.41 
 -10  -2 -10    0.61    0.37 
   4  -3 -10    2.50    0.91 
  -4   3  10    2.20    1.02 
   3  -3 -10    3.04    1.02 
  -3   3  10    2.36    0.83 
   2  -3 -10    0.61    0.50 
  -2   3  10    2.26    0.76 
  -2   3  10    0.06    0.21 
   1  -3 -10    0.36    0.30 
  -1   3  10   -0.34    0.39 
  -1   3  10    1.34    0.45 
   0  -3 -10    7.85    1.47 
   0   3  10    7.31    1.48 
   0   3  10   10.92    1.56 
  -1  -3 -10    3.51    0.88 
  -1  -3 -10    3.77    0.99 
   1   3  10    1.65    0.74 
   1   3  10    3.13    0.78 
  -2  -3 -10   31.68    2.12 
  -2  -3 -10   30.86    2.41 
   2   3  10   31.38    2.25 
  -3  -3 -10   39.88    2.74 
  -3  -3 -10   36.85    2.37 
   3   3  10   40.97    2.61 
  -4  -3 -10   21.51    1.79 
  -4  -3 -10   18.37    1.90 
   4   3  10   20.50    1.90 
  -5  -3 -10   -0.40    0.23 
  -5  -3 -10   -0.06    0.41 
   5   3  10    0.39    0.31 
  -6  -3 -10   11.12    1.62 
  -6  -3 -10   10.17    1.87 
   6   3  10    9.48    1.67 
  -7  -3 -10   14.84    2.27 
  -7  -3 -10   13.66    1.93 
   7   3  10   14.41    2.02 
  -8  -3 -10    1.54    0.46 
  -8  -3 -10    1.19    0.50 
   8   3  10    1.23    0.46 
  -9  -3 -10    0.29    0.44 
  -9  -3 -10    0.51    0.31 
   9   3  10    0.14    0.32 
 -10  -3 -10    6.17    1.45 
   4  -4 -10    3.25    1.06 
  -4   4  10    1.32    0.57 
   3  -4 -10    3.41    1.00 
  -3   4  10    2.24    0.76 
   2  -4 -10    1.95    0.65 
  -2   4  10    1.41    0.74 
   1  -4 -10    5.92    1.32 
  -1   4  10    5.52    1.30 
  -1   4  10    7.53    1.26 
   0  -4 -10    1.39    0.50 
   0   4  10    1.62    0.68 
   0   4  10    0.87    0.36 
  -1  -4 -10    0.82    0.51 
  -1  -4 -10    1.53    0.55 
   1   4  10    0.70    0.37 
   1   4  10    0.92    0.60 
  -2  -4 -10   17.76    1.59 
  -2  -4 -10   16.79    2.22 
   2   4  10   15.62    1.99 
  -3  -4 -10   17.93    1.51 
  -3  -4 -10   17.20    1.78 
   3   4  10   16.76    2.13 
  -4  -4 -10    7.47    1.44 
  -4  -4 -10   10.25    1.55 
   4   4  10    8.98    1.51 
  -5  -4 -10   11.20    1.63 
  -5  -4 -10    8.15    1.54 
   5   4  10   11.94    1.87 
  -6  -4 -10    0.63    0.39 
  -6  -4 -10    1.10    0.64 
   6   4  10    0.54    0.46 
  -7  -4 -10   18.69    1.71 
  -7  -4 -10   19.94    2.69 
   7   4  10   17.87    2.42 
  -8  -4 -10    0.05    0.27 
  -8  -4 -10   -0.35    0.42 
   8   4  10   -0.45    0.26 
  -9  -4 -10    1.61    0.96 
   9   4  10    4.51    1.06 
 -10  -4 -10    6.26    1.71 
  10   4  10    5.99    1.30 
   3  -5 -10    3.05    1.08 
  -3   5  10    4.51    1.00 
   2  -5 -10    4.35    1.24 
  -2   5  10    3.36    1.10 
   1  -5 -10    0.56    0.39 
  -1   5  10   -0.27    0.22 
  -1   5  10    0.01    0.31 
   0  -5 -10   18.20    2.43 
   0   5  10   18.80    2.52 
   0   5  10   16.68    1.54 
  -1  -5 -10    0.19    0.23 
   1   5  10    1.01    0.32 
   1   5  10   -0.24    0.29 
  -2  -5 -10    1.09    0.44 
  -2  -5 -10    1.31    0.52 
   2   5  10    1.85    0.69 
   2   5  10    1.06    0.38 
  -3  -5 -10    6.59    1.39 
  -3  -5 -10    6.18    1.16 
   3   5  10    6.68    1.30 
  -4  -5 -10    0.91    0.45 
  -4  -5 -10    0.64    0.41 
   4   5  10    0.23    0.24 
  -5  -5 -10   13.13    1.72 
  -5  -5 -10   12.68    1.96 
   5   5  10   13.59    1.98 
  -6  -5 -10   20.77    1.67 
  -6  -5 -10   20.26    2.08 
   6   5  10   20.88    2.04 
  -7  -5 -10    5.30    1.01 
  -7  -5 -10    3.11    1.12 
   7   5  10    2.36    0.78 
  -8  -5 -10   10.82    2.00 
   8   5  10   10.31    1.88 
  -9  -5 -10    5.37    1.50 
   9   5  10    3.35    0.87 
   3  -6 -10    1.67    0.62 
   2  -6 -10   -0.07    0.44 
  -2   6  10   -0.89    0.35 
   1  -6 -10    2.50    0.89 
  -1   6  10    3.42    1.07 
   0  -6 -10    7.43    1.49 
   0   6  10    5.94    1.07 
   0   6  10    7.70    1.46 
  -1  -6 -10    5.87    1.27 
   1   6  10    6.86    1.30 
   1   6  10    5.61    1.22 
  -2  -6 -10   59.70    3.57 
  -2  -6 -10   66.72    3.24 
   2   6  10   58.80    3.34 
   2   6  10   64.65    3.47 
  -3  -6 -10   67.72    3.80 
  -3  -6 -10   71.13    3.22 
   3   6  10   68.11    3.67 
  -4  -6 -10   35.56    2.21 
  -4  -6 -10   27.31    2.40 
   4   6  10   28.99    2.38 
  -5  -6 -10   15.76    2.19 
  -5  -6 -10   14.69    1.31 
   5   6  10   14.25    2.09 
  -6  -6 -10    1.08    0.57 
   6   6  10    1.10    0.52 
  -7  -6 -10   -0.37    0.44 
   7   6  10   -0.71    0.28 
  -8  -6 -10    4.51    1.21 
   8   6  10    4.88    1.02 
  -9  -6 -10    0.07    0.42 
   9   6  10    0.84    0.40 
   2  -7 -10    0.09    0.41 
  -2   7  10    0.66    0.45 
   1  -7 -10    2.25    0.74 
  -1   7  10    2.13    0.88 
   0  -7 -10   22.12    2.19 
   0   7  10   18.46    2.57 
   0   7  10   15.08    1.98 
  -1  -7 -10    3.81    1.02 
   1   7  10    4.42    1.01 
   1   7  10    4.87    1.05 
  -2  -7 -10    5.90    1.23 
  -2  -7 -10    7.70    1.35 
   2   7  10    9.60    1.56 
   2   7  10    8.60    1.50 
  -3  -7 -10    5.51    1.04 
  -3  -7 -10    6.28    1.29 
   3   7  10    5.41    1.19 
  -4  -7 -10    7.94    1.53 
   4   7  10    8.60    1.61 
  -5  -7 -10    6.18    1.41 
   5   7  10    7.25    1.49 
  -6  -7 -10    4.03    1.14 
   6   7  10    2.08    0.70 
  -7  -7 -10    2.89    1.05 
   7   7  10    1.95    0.63 
  -8  -7 -10   -0.49    0.35 
   8   7  10    0.58    0.32 
  -9  -7 -10    2.10    0.81 
   9   7  10    3.78    0.91 
   1  -8 -10    0.78    0.43 
  -1   8  10   -0.73    0.44 
   0  -8 -10   -0.18    0.44 
   0   8  10    0.39    0.42 
  -1  -8 -10   -0.38    0.30 
   1   8  10    0.90    0.34 
   1   8  10    0.18    0.34 
  -2  -8 -10    9.69    1.77 
   2   8  10    9.35    1.59 
   2   8  10   10.81    1.79 
  -3  -8 -10   14.04    2.10 
  -3  -8 -10   10.15    1.43 
   3   8  10   12.49    1.83 
  -4  -8 -10   31.91    2.62 
   4   8  10   28.81    2.54 
  -5  -8 -10    7.17    1.55 
   5   8  10    4.59    1.25 
  -6  -8 -10    9.18    1.82 
   6   8  10    5.29    1.32 
  -7  -8 -10    0.43    0.57 
   7   8  10    0.73    0.45 
  -8  -8 -10   -0.26    0.37 
   8   8  10   -0.10    0.31 
  -1  -9 -10    1.46    0.57 
   1   9  10    2.54    0.58 
   1   9  10    1.77    0.50 
  -2  -9 -10   12.86    2.17 
   2   9  10    9.43    1.73 
  -3  -9 -10   13.39    2.08 
   3   9  10   11.40    2.03 
  -4  -9 -10    2.87    0.88 
   4   9  10    1.61    0.77 
  -5  -9 -10    0.35    0.54 
   5   9  10    1.05    0.67 
  -6  -9 -10    4.34    1.15 
   6   9  10    5.22    1.49 
  -7  -9 -10    0.79    0.66 
   7   9  10    1.29    0.61 
  -2 -10 -10    1.01    0.47 
   2  10  10    2.07    0.60 
  -3 -10 -10   11.78    1.89 
   3  10  10   10.21    1.77 
  -4 -10 -10    0.10    0.38 
   4  10  10    0.33    0.35 
  -5 -10 -10   -0.46    0.34 
   5  10  10   -0.47    0.37 
  -6 -10 -10    1.75    0.58 
   6  10  10   -0.47    0.37 
   1   9 -11    5.28    1.32 
   0   9 -11    1.79    0.80 
   0   9 -11    0.39    0.39 
   0  -9  11   -0.10    0.34 
  -1   9 -11    2.51    0.71 
  -1   9 -11    3.19    1.16 
   1  -9  11    2.79    0.73 
  -2   9 -11   13.17    2.09 
  -2   9 -11   11.77    2.02 
   2  -9  11   10.60    1.94 
   3   8 -11    1.48    0.61 
   2   8 -11    0.19    0.28 
  -2  -8  11   -0.13    0.33 
   1   8 -11    1.35    0.44 
   1   8 -11    2.07    0.52 
  -1  -8  11    1.66    0.54 
   0   8 -11    0.60    0.40 
   0   8 -11   -0.66    0.34 
   0  -8  11    1.20    0.38 
  -1   8 -11    0.05    0.38 
  -1   8 -11    0.14    0.36 
   1  -8  11    0.15    0.31 
  -2   8 -11   13.36    2.16 
   2  -8  11   10.93    1.83 
  -3   8 -11    0.92    0.40 
   3  -8  11   -0.05    0.32 
  -4   8 -11    1.00    0.48 
   4  -8  11   -0.30    0.31 
   3   7 -11   -0.41    0.33 
   3   7 -11    0.11    0.31 
  -3  -7  11   -0.05    0.44 
   2   7 -11    0.15    0.34 
   2   7 -11    0.55    0.31 
  -2  -7  11   -0.01    0.45 
   1   7 -11    0.26    0.35 
   1   7 -11    0.31    0.38 
  -1  -7  11   -0.32    0.32 
   0   7 -11   -0.10    0.26 
  -1   7 -11    2.70    0.85 
   1  -7  11    0.52    0.60 
  -2   7 -11    0.85    0.40 
   2  -7  11    0.57    0.35 
  -3   7 -11    0.33    0.37 
   3  -7  11    0.28    0.27 
  -4   7 -11    1.14    0.62 
   4  -7  11    0.31    0.28 
  -5   7 -11    1.02    0.54 
   5  -7  11    0.59    0.31 
   4   6 -11    1.17    0.34 
   4   6 -11    2.04    0.38 
   3   6 -11    1.41    0.49 
   3   6 -11    1.27    0.41 
  -3  -6  11    2.53    0.79 
   2   6 -11    0.26    0.34 
  -2  -6  11    0.32    0.33 
   1   6 -11    8.31    1.57 
  -1  -6  11    9.13    1.69 
   0   6 -11    3.63    1.02 
   0  -6  11    3.88    1.07 
  -1   6 -11   14.56    2.17 
   1  -6  11    9.35    1.72 
  -2   6 -11   10.60    1.92 
   2  -6  11    9.23    1.68 
  -3   6 -11   21.65    2.86 
   3  -6  11   18.58    2.46 
  -4   6 -11   11.81    2.01 
   4  -6  11    8.25    1.55 
  -5   6 -11    4.28    1.18 
   5  -6  11    3.20    0.92 
  -6   6 -11   -0.70    0.47 
   6  -6  11    1.11    0.42 
   4   5 -11   -0.89    0.32 
   4   5 -11    0.16    0.28 
   4   5 -11   -0.15    0.29 
  -4  -5  11    1.10    0.46 
   3   5 -11    0.19    0.24 
   3   5 -11    0.79    0.37 
  -3  -5  11   -0.12    0.24 
   2   5 -11    0.05    0.30 
   2   5 -11   -0.01    0.21 
  -2  -5  11    0.21    0.50 
   1   5 -11    6.88    1.43 
   1   5 -11    6.50    1.15 
  -1  -5  11    6.13    1.39 
   0   5 -11    5.60    1.06 
   0   5 -11    4.95    1.27 
   0  -5  11    4.42    1.10 
  -1   5 -11    6.86    1.15 
  -1   5 -11    9.38    1.71 
   1  -5  11    7.16    1.45 
  -2   5 -11   28.66    2.45 
  -2   5 -11   31.75    2.82 
   2  -5  11   24.91    2.26 
  -3   5 -11    6.91    1.53 
   3  -5  11    8.50    1.59 
  -4   5 -11    4.26    1.17 
   4  -5  11    1.44    0.60 
  -5   5 -11   14.26    2.28 
   5  -5  11   14.73    2.17 
  -6   5 -11   18.53    2.76 
   6  -5  11   19.84    2.47 
  -7   5 -11    9.92    2.12 
   7  -5  11    8.39    1.41 
   5   4 -11    2.68    0.87 
   4   4 -11    2.98    0.82 
   4   4 -11    1.77    0.43 
   4   4 -11    1.66    0.50 
  -4  -4  11    3.11    0.64 
   3   4 -11    0.31    0.39 
   3   4 -11    1.40    0.49 
  -3  -4  11    0.54    0.30 
   2   4 -11   -0.12    0.24 
  -2  -4  11    0.12    0.24 
   1   4 -11   13.58    2.14 
   1   4 -11   10.39    1.60 
  -1  -4  11   11.04    1.79 
   0   4 -11   12.12    1.67 
   0   4 -11   13.39    2.07 
   0  -4  11   10.10    1.79 
  -1   4 -11    2.01    0.74 
  -1   4 -11    1.70    0.50 
  -2   4 -11   19.87    1.74 
  -2   4 -11   23.30    2.18 
   2  -4  11   19.95    2.45 
  -3   4 -11   12.99    1.71 
  -3   4 -11   16.68    2.33 
   3  -4  11   12.00    1.87 
  -4   4 -11    3.87    1.12 
  -4   4 -11    1.86    0.53 
   4  -4  11    3.14    0.86 
  -5   4 -11    0.25    0.50 
  -5   4 -11   -0.17    0.27 
   5  -4  11   -0.15    0.20 
  -6   4 -11    3.67    1.09 
  -6   4 -11    6.54    1.26 
   6  -4  11    4.35    1.05 
  -7   4 -11    1.17    0.80 
  -7   4 -11    1.84    0.43 
   7  -4  11    1.67    0.49 
  -8   4 -11   14.98    2.43 
  -8   4 -11   14.90    2.51 
   5   3 -11    4.50    1.11 
   5   3 -11    2.79    0.84 
  -5  -3  11    1.88    0.52 
   4   3 -11   10.75    1.73 
   4   3 -11   10.27    1.77 
  -4  -3  11   11.07    2.03 
  -4  -3  11   10.40    0.90 
   3   3 -11    1.29    0.56 
   3   3 -11    4.33    1.12 
  -3  -3  11    3.12    0.83 
   2   3 -11   26.77    2.21 
   2   3 -11   25.96    2.15 
  -2  -3  11   27.20    2.23 
   1   3 -11    6.00    1.22 
  -1  -3  11    5.82    1.25 
   0   3 -11    4.56    0.96 
   0   3 -11    4.58    1.16 
   0  -3  11    8.21    1.50 
  -1   3 -11   54.98    3.26 
  -1   3 -11   54.71    2.99 
   1  -3  11   55.26    3.23 
  -2   3 -11   32.58    2.52 
  -2   3 -11   32.05    2.24 
   2  -3  11   30.64    2.39 
  -3   3 -11  134.02    5.44 
  -3   3 -11  135.23    4.87 
   3  -3  11  128.92    5.19 
  -4   3 -11   12.34    1.73 
  -4   3 -11   16.18    2.35 
   4  -3  11   13.85    1.95 
  -5   3 -11   13.91    2.22 
  -5   3 -11   12.49    1.91 
   5  -3  11   13.69    2.03 
  -6   3 -11    1.44    0.52 
  -6   3 -11    1.37    0.67 
   6  -3  11    1.67    0.68 
  -7   3 -11    1.01    0.43 
  -7   3 -11    1.35    0.78 
   7  -3  11   -0.36    0.31 
  -8   3 -11    4.58    1.31 
  -8   3 -11    1.61    0.69 
   5   2 -11    0.87    0.34 
  -5  -2  11   -0.18    0.47 
   4   2 -11    3.09    0.96 
   4   2 -11    2.23    0.66 
  -4  -2  11    1.06    0.64 
   3   2 -11    0.44    0.44 
   3   2 -11    0.46    0.30 
  -3  -2  11   -1.04    0.34 
  -3  -2  11    0.72    0.28 
   2   2 -11   17.72    1.81 
   2   2 -11   20.89    1.95 
  -2  -2  11   16.82    2.11 
   1   2 -11   16.90    1.74 
   1   2 -11   20.52    1.91 
  -1  -2  11   19.53    1.77 
   0   2 -11   10.57    1.65 
   0  -2  11   10.12    1.61 
  -1   2 -11   12.28    1.81 
  -1   2 -11   12.75    1.94 
   1  -2  11   13.23    1.88 
  -2   2 -11    4.06    1.06 
  -2   2 -11    6.74    1.29 
   2  -2  11    6.87    1.36 
  -3   2 -11   37.51    2.55 
  -3   2 -11   34.84    2.63 
   3  -2  11   34.78    2.52 
  -4   2 -11    0.24    0.41 
  -4   2 -11    0.58    0.39 
   4  -2  11   -0.08    0.27 
  -5   2 -11    3.77    1.08 
  -5   2 -11    2.50    0.80 
  -6   2 -11    0.35    0.35 
  -6   2 -11   -0.44    0.37 
   6  -2  11    0.37    0.22 
  -7   2 -11    4.60    1.10 
  -7   2 -11    3.47    1.10 
   7  -2  11    4.61    1.03 
  -8   2 -11    7.37    1.63 
  -8   2 -11    4.40    1.14 
   8  -2  11    5.03    1.09 
  -9   2 -11   -0.08    0.40 
   5   1 -11    2.64    1.00 
  -5  -1  11    2.42    1.15 
   4   1 -11    1.21    0.61 
  -4  -1  11   -1.17    0.35 
   3   1 -11    0.26    0.31 
   3   1 -11    0.76    0.61 
  -3  -1  11    0.02    0.47 
  -3  -1  11    0.69    0.50 
   2   1 -11    1.38    0.65 
   2   1 -11    1.27    0.55 
  -2  -1  11    2.48    0.55 
  -2  -1  11    2.79    0.75 
   1   1 -11    1.07    0.42 
   1   1 -11    1.22    0.51 
  -1  -1  11    0.63    0.26 
   0   1 -11    1.16    0.64 
   0   1 -11    1.58    0.65 
   0  -1  11    1.08    0.42 
  -1   1 -11    2.91    0.88 
  -1   1 -11    2.43    0.87 
   1  -1  11    1.34    0.52 
  -2   1 -11   50.58    3.10 
  -2   1 -11   54.73    3.15 
   2  -1  11   53.79    3.11 
  -3   1 -11   39.12    2.69 
  -3   1 -11   39.35    2.66 
   3  -1  11   38.27    2.65 
  -4   1 -11    0.20    0.50 
  -4   1 -11    1.21    0.51 
   4  -1  11    1.58    0.69 
  -5   1 -11    1.52    0.52 
  -5   1 -11   -0.06    0.30 
   5  -1  11    0.28    0.34 
  -6   1 -11    0.59    0.53 
  -6   1 -11    0.92    0.70 
   6  -1  11    1.34    0.49 
  -7   1 -11    0.62    0.37 
  -7   1 -11    1.08    0.66 
   7  -1  11    1.45    0.42 
  -8   1 -11    0.43    0.44 
  -8   1 -11    1.86    0.61 
   8  -1  11    1.62    0.57 
  -9   1 -11    3.99    1.25 
  -9   1 -11    3.61    1.06 
  -4   0  11    2.63    0.94 
   3   0 -11    9.87    1.85 
  -3   0  11   13.22    2.33 
   2   0 -11   -0.16    0.39 
   2   0 -11    0.42    0.32 
  -2   0  11    0.13    0.51 
  -2   0  11    0.81    0.31 
   1   0 -11    5.42    1.21 
   1   0 -11    3.57    1.01 
  -1   0  11    5.54    1.18 
  -1   0  11    5.74    1.31 
   0   0 -11    0.02    0.26 
   0   0 -11    0.07    0.21 
   0   0  11    0.37    0.22 
  -1   0 -11   32.25    2.43 
  -1   0 -11   35.58    2.41 
   1   0  11   36.51    2.49 
  -2   0 -11    7.98    1.47 
  -2   0 -11    5.91    1.30 
   2   0  11    5.83    1.24 
  -3   0 -11   36.92    2.61 
  -3   0 -11   40.72    2.68 
   3   0  11   43.41    2.82 
  -4   0 -11    4.32    1.16 
  -4   0 -11    4.48    1.07 
   4   0  11    5.06    1.18 
  -5   0 -11    2.76    0.87 
  -5   0 -11    1.13    0.62 
   5   0  11    0.94    0.51 
  -6   0 -11    3.88    1.13 
  -6   0 -11    3.52    1.11 
   6   0  11    3.01    0.88 
  -7   0 -11    0.28    0.28 
  -7   0 -11    1.54    0.62 
   7   0  11   -0.14    0.23 
  -8   0 -11    3.41    0.98 
  -8   0 -11    5.74    1.33 
   8   0  11    2.79    0.83 
  -9   0 -11    1.14    0.62 
  -9   0 -11    1.60    0.62 
   9   0  11    0.14    0.30 
   4  -1 -11   -0.17    0.30 
  -4   1  11    1.01    0.61 
   3  -1 -11    1.41    0.76 
  -3   1  11    2.18    0.84 
   2  -1 -11    2.80    1.01 
  -2   1  11    2.24    0.52 
  -2   1  11    1.58    0.67 
   1  -1 -11    5.81    1.30 
   1  -1 -11    5.91    1.39 
  -1   1  11    8.47    1.37 
  -1   1  11    6.51    1.37 
   0  -1 -11    1.96    0.77 
   0  -1 -11    1.86    0.69 
   0   1  11    3.03    0.78 
  -1  -1 -11    0.53    0.45 
  -1  -1 -11    0.12    0.22 
   1   1  11    0.19    0.25 
  -2  -1 -11   18.77    1.89 
   2   1  11   20.40    1.88 
  -3  -1 -11   10.36    1.70 
  -3  -1 -11    8.37    1.55 
   3   1  11   10.41    1.70 
  -4  -1 -11    1.92    0.81 
  -4  -1 -11    0.69    0.50 
   4   1  11    0.58    0.39 
  -5  -1 -11    5.14    1.19 
  -5  -1 -11    7.92    1.54 
   5   1  11    4.97    1.20 
  -6  -1 -11    0.64    0.53 
  -6  -1 -11    0.56    0.62 
   6   1  11    0.64    0.40 
  -7  -1 -11    1.10    0.57 
  -7  -1 -11    1.08    0.68 
   7   1  11    2.32    0.69 
  -8  -1 -11    1.15    0.42 
  -8  -1 -11   -0.35    0.27 
   8   1  11    0.36    0.31 
  -9  -1 -11    0.12    0.33 
  -9  -1 -11    0.70    0.40 
   9   1  11    0.29    0.33 
   4  -2 -11    2.64    0.84 
  -4   2  11    1.13    1.00 
   3  -2 -11    4.91    1.07 
  -3   2  11   12.21    2.23 
   2  -2 -11    4.93    1.27 
  -2   2  11    7.28    1.57 
  -2   2  11    4.05    0.90 
   1  -2 -11   20.19    2.63 
  -1   2  11   21.50    2.79 
  -1   2  11   19.11    1.68 
   0  -2 -11    0.77    0.51 
   0  -2 -11    2.00    0.77 
   0   2  11    1.49    0.43 
   0   2  11    1.58    0.71 
  -1  -2 -11    0.17    0.28 
  -1  -2 -11    1.06    0.59 
   1   2  11    0.23    0.25 
  -2  -2 -11   21.59    2.08 
  -2  -2 -11   22.43    1.84 
   2   2  11   20.38    1.85 
  -3  -2 -11   28.28    2.36 
  -3  -2 -11   27.51    2.15 
   3   2  11   25.36    2.12 
  -4  -2 -11    0.85    0.41 
  -4  -2 -11    1.66    0.71 
   4   2  11    0.34    0.37 
  -5  -2 -11   -0.36    0.31 
  -5  -2 -11    0.50    0.33 
   5   2  11    0.04    0.36 
  -6  -2 -11   25.38    2.39 
  -6  -2 -11   22.86    2.01 
   6   2  11   27.50    2.34 
  -7  -2 -11    1.82    0.55 
  -7  -2 -11    1.17    0.53 
   7   2  11    1.18    0.47 
  -8  -2 -11    4.25    1.05 
  -8  -2 -11    6.43    1.52 
   8   2  11    7.49    1.42 
  -9  -2 -11    0.74    0.34 
  -9  -2 -11    1.43    0.53 
   9   2  11    1.10    0.41 
   3  -3 -11    1.66    0.78 
  -3   3  11    1.35    0.66 
   2  -3 -11    3.87    1.14 
  -2   3  11    5.10    1.16 
   1  -3 -11    3.16    1.04 
  -1   3  11    2.24    0.84 
  -1   3  11    1.18    0.48 
   0  -3 -11    1.37    0.53 
   0  -3 -11    0.45    0.49 
   0   3  11   -0.12    0.39 
   0   3  11    0.35    0.39 
  -1  -3 -11   -0.48    0.32 
  -1  -3 -11    0.13    0.24 
   1   3  11    0.79    0.39 
   1   3  11    0.41    0.44 
  -2  -3 -11   -0.14    0.29 
  -2  -3 -11    1.70    0.61 
   2   3  11    1.00    0.47 
  -3  -3 -11   20.05    1.79 
  -3  -3 -11   17.10    2.30 
   3   3  11   18.38    1.80 
  -4  -3 -11    0.99    0.48 
  -4  -3 -11    0.78    0.66 
   4   3  11    0.16    0.38 
  -5  -3 -11    2.99    0.84 
  -5  -3 -11    2.90    0.96 
   5   3  11    3.07    0.93 
  -6  -3 -11    0.86    0.52 
  -6  -3 -11    0.15    0.32 
   6   3  11    1.39    0.47 
  -7  -3 -11   -0.35    0.28 
  -7  -3 -11    0.08    0.29 
   7   3  11    0.12    0.25 
  -8  -3 -11    2.12    0.74 
  -8  -3 -11    3.43    0.90 
   8   3  11    3.39    0.89 
  -9  -3 -11   -0.32    0.31 
  -9  -3 -11   -0.21    0.33 
   9   3  11    0.10    0.33 
   3  -4 -11    5.82    1.67 
  -3   4  11    6.41    1.38 
   2  -4 -11    2.51    0.83 
  -2   4  11    2.15    0.63 
   1  -4 -11    1.93    0.80 
  -1   4  11    2.36    0.61 
  -1   4  11    4.46    1.13 
   0  -4 -11    3.89    1.10 
   0   4  11    2.42    0.64 
   0   4  11    2.20    0.75 
  -1  -4 -11    6.42    1.30 
  -1  -4 -11    4.85    1.26 
   1   4  11    4.51    1.09 
   1   4  11    3.98    0.94 
  -2  -4 -11   18.24    1.66 
  -2  -4 -11   14.84    2.18 
   2   4  11   16.32    2.12 
  -3  -4 -11    4.72    1.15 
  -3  -4 -11    4.44    0.96 
   3   4  11    6.14    1.30 
  -4  -4 -11    2.91    0.73 
  -4  -4 -11    2.22    0.86 
   4   4  11    4.38    1.00 
  -5  -4 -11    4.01    1.14 
  -5  -4 -11    2.91    0.79 
   5   4  11    3.39    0.97 
  -6  -4 -11   12.34    2.10 
  -6  -4 -11   10.55    1.69 
   6   4  11   10.47    1.78 
  -7  -4 -11   -0.04    0.42 
  -7  -4 -11    0.72    0.48 
   7   4  11    0.95    0.45 
  -8  -4 -11    1.17    0.62 
  -8  -4 -11    1.21    0.47 
   8   4  11    0.69    0.40 
  -9  -4 -11   -0.35    0.53 
   9   4  11   -0.80    0.27 
   2  -5 -11    0.16    0.48 
  -2   5  11    1.51    0.47 
   1  -5 -11    0.78    0.44 
  -1   5  11    0.48    0.50 
   0  -5 -11    1.18    0.75 
   0   5  11    1.78    0.58 
   0   5  11    2.15    0.42 
  -1  -5 -11    2.11    0.74 
  -1  -5 -11    2.84    0.95 
   1   5  11    1.98    0.66 
   1   5  11    0.82    0.46 
  -2  -5 -11    7.57    1.34 
  -2  -5 -11    7.29    1.55 
   2   5  11    8.15    1.43 
  -3  -5 -11   -0.34    0.21 
  -3  -5 -11   -0.44    0.19 
   3   5  11   -0.25    0.24 
  -4  -5 -11    5.61    1.24 
  -4  -5 -11    5.32    1.30 
   4   5  11    4.05    1.09 
  -5  -5 -11   10.22    1.49 
  -5  -5 -11    9.30    1.84 
   5   5  11    8.16    1.54 
  -6  -5 -11    2.20    0.51 
  -6  -5 -11    0.76    0.56 
   6   5  11    2.89    0.90 
  -7  -5 -11   10.80    1.11 
  -7  -5 -11   13.78    2.27 
   7   5  11   11.97    1.98 
  -8  -5 -11    3.11    1.05 
   8   5  11    2.18    0.93 
  -9  -5 -11   18.65    2.95 
   9   5  11   20.07    2.77 
   2  -6 -11    1.12    0.41 
  -2   6  11   -0.35    0.40 
   1  -6 -11    6.39    1.53 
  -1   6  11    9.36    1.84 
   0  -6 -11    0.73    0.43 
   0   6  11    2.36    0.64 
   0   6  11    1.92    0.50 
  -1  -6 -11    5.96    1.42 
   1   6  11    7.20    1.51 
   1   6  11    8.12    1.48 
  -2  -6 -11   11.10    1.89 
  -2  -6 -11    9.24    1.43 
   2   6  11    9.49    1.63 
   2   6  11   10.20    1.77 
  -3  -6 -11   13.21    1.70 
  -3  -6 -11   14.06    2.16 
   3   6  11   11.08    1.80 
  -4  -6 -11    0.18    0.26 
  -4  -6 -11   -0.02    0.39 
   4   6  11   -0.19    0.37 
  -5  -6 -11    1.82    0.83 
  -5  -6 -11    1.39    0.46 
   5   6  11    2.29    0.83 
  -6  -6 -11    0.85    0.58 
   6   6  11   -0.55    0.34 
  -7  -6 -11    1.85    0.79 
   7   6  11    1.84    0.68 
  -8  -6 -11    0.69    0.55 
   8   6  11    0.67    0.33 
  -9  -6 -11    0.68    0.57 
   9   6  11    0.07    0.42 
   1  -7 -11    0.03    0.45 
  -1   7  11    0.10    0.45 
   0  -7 -11    0.86    0.54 
   0   7  11    1.11    0.44 
   0   7  11    0.89    0.30 
  -1  -7 -11    1.70    0.68 
   1   7  11    0.46    0.46 
   1   7  11    2.57    0.74 
  -2  -7 -11    9.09    1.56 
  -2  -7 -11    8.30    1.73 
   2   7  11    9.30    1.63 
   2   7  11    5.19    1.27 
  -3  -7 -11    8.41    1.32 
  -3  -7 -11    8.41    1.62 
   3   7  11    7.88    1.59 
  -4  -7 -11   -0.32    0.34 
   4   7  11    1.10    0.61 
  -5  -7 -11   20.82    3.00 
   5   7  11   22.19    2.19 
  -6  -7 -11   15.62    2.44 
   6   7  11   15.33    2.24 
  -7  -7 -11    8.99    1.76 
   7   7  11    9.18    1.83 
  -8  -7 -11    1.70    0.65 
   8   7  11    1.19    0.39 
   0  -8 -11    0.23    0.40 
   0   8  11   -0.50    0.42 
  -1  -8 -11    7.70    1.65 
   1   8  11    8.55    1.60 
   1   8  11    9.51    1.46 
  -2  -8 -11    2.13    0.80 
  -2  -8 -11    2.55    0.76 
   2   8  11    2.66    0.77 
   2   8  11    1.48    0.48 
  -3  -8 -11   16.59    1.43 
  -3  -8 -11   21.75    2.22 
   3   8  11   15.08    2.27 
  -4  -8 -11    4.49    1.09 
   4   8  11    2.19    0.94 
  -5  -8 -11    5.05    1.36 
   5   8  11    4.04    1.13 
  -6  -8 -11    3.86    1.13 
   6   8  11    0.84    0.68 
  -7  -8 -11   -0.19    0.42 
   7   8  11    0.01    0.40 
  -8  -8 -11    5.51    1.44 
  -2  -9 -11    0.25    0.38 
   2   9  11    0.56    0.51 
  -3  -9 -11    3.13    1.09 
   3   9  11    1.06    0.67 
  -4  -9 -11    2.61    0.76 
   4   9  11    3.61    1.02 
  -5  -9 -11    4.57    1.17 
   5   9  11    4.53    1.27 
  -6  -9 -11    1.96    0.73 
   6   9  11    0.76    0.75 
   7   9  11    0.44    0.36 
   1   8 -12    0.00    0.39 
   1   8 -12    1.17    0.40 
  -1  -8  12   -0.32    0.33 
   0   8 -12    1.04    0.48 
   0   8 -12    0.64    0.36 
   0  -8  12    0.39    0.70 
  -1   8 -12    0.56    0.45 
   1  -8  12    0.85    0.41 
  -2   8 -12    5.24    1.13 
   2  -8  12    2.69    0.72 
  -3   8 -12   -0.47    0.43 
   3  -8  12    0.36    0.34 
   2   7 -12    0.01    0.34 
   2   7 -12    0.72    0.37 
  -2  -7  12    0.60    0.64 
   1   7 -12    4.39    1.04 
  -1  -7  12    2.94    0.95 
   0   7 -12   -0.22    0.33 
   0  -7  12    0.27    0.41 
  -1   7 -12   11.58    2.02 
   1  -7  12   10.57    1.95 
  -2   7 -12    1.02    0.65 
   2  -7  12    2.19    0.68 
  -3   7 -12    1.76    0.71 
   3  -7  12    2.74    0.84 
  -4   7 -12    0.57    0.68 
   4  -7  12    0.08    0.30 
   5  -7  12   10.75    1.77 
   3   6 -12   -0.45    0.28 
   3   6 -12    0.42    0.37 
  -3  -6  12    0.43    0.36 
   2   6 -12    5.55    1.26 
  -2  -6  12    4.41    1.17 
   1   6 -12    0.52    0.36 
  -1  -6  12    0.88    0.63 
   0   6 -12    0.50    0.39 
   0  -6  12    1.04    0.54 
  -1   6 -12   -0.82    0.37 
   1  -6  12   -0.53    0.24 
  -2   6 -12   20.37    2.71 
   2  -6  12   15.73    2.33 
  -3   6 -12    2.96    0.83 
   3  -6  12    5.15    1.33 
  -4   6 -12    4.27    1.41 
   4  -6  12    6.68    1.52 
  -5   6 -12    0.06    0.41 
   5  -6  12    0.21    0.31 
  -6   6 -12    0.57    0.54 
   6  -6  12    0.80    0.34 
   3   5 -12    0.52    0.34 
  -3  -5  12   -0.08    0.34 
   2   5 -12    1.82    0.72 
  -2  -5  12    4.92    1.24 
   1   5 -12    5.42    1.20 
  -1  -5  12    5.19    1.30 
   0   5 -12   -0.08    0.32 
   0  -5  12   -0.09    0.37 
  -1   5 -12   10.12    1.75 
   1  -5  12    7.55    1.49 
  -2   5 -12    2.88    0.97 
   2  -5  12    1.27    0.59 
  -3   5 -12    1.31    0.64 
   3  -5  12    4.00    1.07 
  -4   5 -12    1.54    0.67 
   4  -5  12    0.88    0.37 
  -5   5 -12   18.08    2.64 
   5  -5  12   21.80    2.08 
  -6   5 -12    0.29    0.48 
   6  -5  12    0.94    0.35 
   4   4 -12    1.65    0.56 
   4   4 -12    0.84    0.34 
  -4  -4  12    0.48    0.35 
   3   4 -12    2.59    0.81 
   3   4 -12    2.24    0.63 
  -3  -4  12    2.89    0.87 
   2   4 -12   -0.05    0.25 
  -2  -4  12    0.95    0.40 
   1   4 -12    2.80    0.82 
   1   4 -12    5.28    1.11 
  -1  -4  12    1.10    0.53 
   0   4 -12    7.87    1.41 
   0   4 -12    7.75    1.65 
   0  -4  12   10.17    1.78 
  -1   4 -12    1.36    0.49 
   1  -4  12    1.61    0.56 
  -2   4 -12   -0.20    0.25 
   2  -4  12    0.24    0.35 
  -3   4 -12    4.26    1.19 
  -3   4 -12    3.24    0.87 
   3  -4  12    1.58    0.63 
  -4   4 -12    2.47    0.87 
  -4   4 -12    2.82    0.81 
   4  -4  12    4.19    1.08 
  -5   4 -12   12.18    1.80 
  -5   4 -12   11.46    2.00 
   5  -4  12   12.25    1.97 
  -6   4 -12    7.29    1.32 
  -6   4 -12   10.02    2.01 
   6  -4  12    9.70    1.75 
  -7   4 -12    1.84    1.16 
   7  -4  12    2.41    0.44 
   4   3 -12    1.15    0.39 
   4   3 -12    0.74    0.43 
   3   3 -12    0.29    0.33 
   3   3 -12    1.45    0.36 
  -3  -3  12   -0.14    0.30 
   2   3 -12   -0.03    0.35 
   2   3 -12    0.22    0.31 
  -2  -3  12   -0.30    0.39 
   1   3 -12   -0.25    0.25 
  -1  -3  12   -0.61    0.22 
   0   3 -12    4.49    1.04 
   0   3 -12    5.99    1.35 
   0  -3  12    6.13    1.36 
  -1   3 -12   11.74    1.98 
  -1   3 -12   11.56    1.77 
   1  -3  12    9.41    1.70 
  -2   3 -12   14.08    2.14 
  -2   3 -12   18.16    1.72 
   2  -3  12   18.81    2.42 
  -3   3 -12    0.96    0.47 
  -3   3 -12    1.29    0.64 
   3  -3  12    1.66    0.72 
  -4   3 -12   14.43    2.24 
  -4   3 -12   14.95    2.03 
   4  -3  12   14.52    2.13 
  -5   3 -12   12.19    1.89 
  -5   3 -12   13.06    2.21 
   5  -3  12   12.59    1.99 
  -6   3 -12   -0.72    0.38 
  -6   3 -12    0.36    0.39 
   6  -3  12   -0.55    0.26 
  -7   3 -12    1.75    0.52 
  -7   3 -12    1.15    0.81 
  -8   3 -12    0.06    0.42 
  -8   3 -12    1.24    0.33 
   8  -3  12    0.92    0.32 
   4   2 -12   -0.18    0.40 
   4   2 -12    1.08    0.39 
  -4  -2  12    0.16    0.55 
   3   2 -12    1.32    0.49 
   3   2 -12   -0.55    0.28 
  -3  -2  12    0.32    0.27 
   2   2 -12    0.22    0.31 
   2   2 -12    0.81    0.34 
  -2  -2  12    0.15    0.37 
   1   2 -12    3.39    0.92 
   1   2 -12    3.71    0.94 
  -1  -2  12    4.78    1.14 
   0   2 -12   21.61    2.01 
   0   2 -12   19.91    2.01 
   0  -2  12   18.51    1.83 
  -1   2 -12   10.77    1.75 
  -1   2 -12   15.16    2.25 
   1  -2  12   11.99    1.83 
  -2   2 -12   71.41    3.88 
  -2   2 -12   67.67    3.60 
   2  -2  12   72.59    3.86 
  -3   2 -12   14.12    2.11 
  -3   2 -12   10.57    1.66 
   3  -2  12   15.36    2.20 
  -4   2 -12    4.27    1.28 
  -4   2 -12    3.67    1.04 
   4  -2  12    3.60    0.97 
  -5   2 -12   -0.03    0.34 
   5  -2  12    0.73    0.43 
  -6   2 -12   17.29    2.66 
  -6   2 -12   15.61    2.25 
   6  -2  12   17.27    2.34 
  -7   2 -12    2.21    1.05 
  -7   2 -12    2.10    0.85 
   7  -2  12    2.02    0.69 
  -8   2 -12    3.57    0.95 
  -8   2 -12    4.67    1.34 
   8  -2  12    4.54    0.92 
   4   1 -12    0.39    0.51 
   4   1 -12    0.19    0.45 
  -4  -1  12    1.20    0.53 
   3   1 -12    0.52    0.39 
   3   1 -12    1.36    0.56 
  -3  -1  12    1.30    0.49 
  -3  -1  12    1.47    0.87 
   2   1 -12   -0.23    0.26 
   2   1 -12    0.22    0.36 
  -2  -1  12   -0.50    0.26 
   1   1 -12   -0.09    0.27 
   1   1 -12   -0.25    0.27 
  -1  -1  12   -0.14    0.24 
   0   1 -12   10.41    1.76 
   0   1 -12    9.90    1.60 
   0  -1  12   10.85    1.74 
  -1   1 -12    9.25    1.76 
  -1   1 -12   10.29    1.73 
   1  -1  12    9.00    1.55 
  -2   1 -12   10.81    1.93 
  -2   1 -12    9.29    1.67 
   2  -1  12    9.17    1.59 
  -3   1 -12   18.15    1.86 
  -3   1 -12   18.06    2.46 
   3  -1  12   18.35    2.34 
  -4   1 -12    9.92    1.73 
  -4   1 -12   10.86    1.91 
   4  -1  12   11.30    1.88 
  -5   1 -12    2.06    0.95 
  -5   1 -12    2.62    0.87 
   5  -1  12    3.28    0.91 
  -6   1 -12    1.07    0.47 
  -6   1 -12    1.96    0.79 
   6  -1  12    1.09    0.39 
  -7   1 -12    0.41    0.34 
  -7   1 -12    1.00    0.78 
   7  -1  12    0.28    0.32 
  -8   1 -12    0.59    0.55 
  -8   1 -12   -0.44    0.41 
   8  -1  12    0.00    0.29 
  -4   0  12    2.50    0.73 
   3   0 -12    0.24    0.54 
   3   0 -12   -0.57    0.28 
  -3   0  12   -0.50    0.41 
   2   0 -12    8.03    1.61 
   2   0 -12    8.98    1.70 
  -2   0  12    9.17    1.43 
  -2   0  12    8.50    1.72 
   1   0 -12   18.26    2.56 
   1   0 -12   20.25    2.51 
  -1   0  12   18.52    1.73 
   0   0 -12   16.56    2.29 
   0   0 -12   18.39    2.27 
   0   0  12   17.77    1.71 
  -1   0 -12    0.89    0.48 
  -2   0 -12   14.62    2.14 
  -2   0 -12   10.43    1.79 
   2   0  12   14.02    1.97 
  -3   0 -12   -0.09    0.33 
  -3   0 -12    0.06    0.35 
   3   0  12   -0.21    0.25 
  -4   0 -12    2.95    0.96 
  -4   0 -12    2.62    0.77 
   4   0  12    2.81    0.90 
  -5   0 -12    0.14    0.42 
  -5   0 -12    0.44    0.35 
   5   0  12    0.57    0.34 
  -6   0 -12    1.14    0.51 
  -6   0 -12    0.64    0.55 
   6   0  12    1.84    0.75 
  -7   0 -12    1.68    0.80 
  -7   0 -12    2.20    0.82 
   7   0  12    2.48    0.77 
  -8   0 -12    0.45    0.33 
  -8   0 -12    2.04    0.67 
   8   0  12    0.83    0.41 
  -9   0 -12   -0.25    0.35 
  -9   0 -12    0.04    0.43 
   9   0  12   -0.21    0.34 
   3  -1 -12    0.25    0.33 
  -3   1  12   -1.15    0.51 
   2  -1 -12    5.21    1.35 
   2  -1 -12    3.06    1.14 
  -2   1  12    1.87    0.87 
  -2   1  12    3.17    0.59 
   1  -1 -12    4.35    1.14 
   1  -1 -12    5.34    1.21 
  -1   1  12    5.06    1.25 
  -1   1  12    5.14    1.08 
   0  -1 -12   12.93    1.88 
   0  -1 -12   13.13    2.03 
   0   1  12   15.44    2.03 
  -1  -1 -12    4.72    1.12 
  -1  -1 -12    6.12    1.37 
   1   1  12    7.49    1.44 
  -2  -1 -12   19.72    2.04 
  -2  -1 -12   21.42    1.98 
   2   1  12   21.22    1.98 
  -3  -1 -12    9.61    1.73 
  -3  -1 -12   14.03    2.04 
   3   1  12   12.57    1.93 
  -4  -1 -12   -0.55    0.25 
  -4  -1 -12    0.26    0.33 
   4   1  12    0.02    0.21 
  -5  -1 -12    0.15    0.27 
  -5  -1 -12   -0.49    0.30 
   5   1  12    0.27    0.36 
  -6  -1 -12    2.34    0.78 
  -6  -1 -12    3.21    1.03 
   6   1  12    1.14    0.64 
  -7  -1 -12    1.98    0.65 
  -7  -1 -12    0.50    0.54 
   7   1  12    2.71    0.67 
  -8  -1 -12    1.06    0.40 
  -8  -1 -12    1.68    0.61 
   8   1  12    3.31    0.96 
  -9  -1 -12    2.84    0.79 
  -9  -1 -12    0.42    0.41 
   9   1  12    1.92    0.59 
   3  -2 -12    2.69    0.99 
  -3   2  12    1.59    0.86 
   2  -2 -12    7.84    1.66 
  -2   2  12    6.33    1.46 
   1  -2 -12    0.28    0.42 
   1  -2 -12    1.20    0.60 
  -1   2  12    0.79    0.39 
  -1   2  12   -0.03    0.37 
   0  -2 -12    1.79    0.82 
   0  -2 -12    0.72    0.51 
   0   2  12    0.87    0.41 
   0   2  12    0.76    0.30 
  -1  -2 -12    1.70    0.66 
  -1  -2 -12    1.33    0.66 
   1   2  12    0.63    0.37 
  -2  -2 -12    0.66    0.41 
  -2  -2 -12    1.90    0.80 
   2   2  12    1.60    0.65 
  -3  -2 -12   13.75    2.02 
  -3  -2 -12   12.40    2.04 
   3   2  12   12.13    1.82 
  -4  -2 -12    0.32    0.33 
  -4  -2 -12    1.00    0.59 
   4   2  12    0.09    0.28 
  -5  -2 -12    5.13    1.29 
  -5  -2 -12    4.77    1.20 
   5   2  12    5.37    1.29 
  -6  -2 -12    6.07    1.44 
  -6  -2 -12    5.70    1.37 
   6   2  12    6.93    1.57 
  -7  -2 -12    0.89    0.67 
  -7  -2 -12    0.64    0.41 
   7   2  12   -0.42    0.24 
  -8  -2 -12    0.34    0.51 
  -8  -2 -12   -0.19    0.36 
   8   2  12    0.14    0.44 
  -9  -2 -12    0.46    0.36 
  -9  -2 -12    1.28    0.44 
   9   2  12   -0.41    0.29 
   3  -3 -12    0.26    0.40 
  -3   3  12   -0.25    0.45 
   2  -3 -12    1.07    0.55 
  -2   3  12    0.91    0.55 
   1  -3 -12    2.63    0.80 
  -1   3  12    3.18    0.86 
  -1   3  12    3.15    1.10 
   0  -3 -12    3.01    1.05 
   0  -3 -12    3.49    1.00 
   0   3  12    1.94    0.57 
   0   3  12    2.63    0.94 
  -1  -3 -12    5.25    1.32 
  -1  -3 -12    5.68    1.22 
   1   3  12    4.10    1.01 
  -2  -3 -12    5.56    1.34 
  -2  -3 -12    6.19    1.31 
   2   3  12    4.87    1.25 
  -3  -3 -12   -0.35    0.22 
  -3  -3 -12    0.66    0.32 
  -4  -3 -12    0.02    0.46 
  -4  -3 -12   -0.05    0.28 
   4   3  12    1.45    0.65 
  -5  -3 -12    6.74    1.46 
  -5  -3 -12    6.17    1.27 
   5   3  12    6.62    1.41 
  -6  -3 -12    3.42    1.09 
  -6  -3 -12    1.90    0.60 
   6   3  12    2.48    0.88 
  -7  -3 -12    4.73    1.07 
  -7  -3 -12    4.53    1.21 
   7   3  12    3.81    1.06 
  -8  -3 -12    0.27    0.34 
  -8  -3 -12    1.44    0.54 
   8   3  12    0.44    0.44 
  -9  -3 -12   -0.23    0.35 
  -9  -3 -12    1.44    0.65 
   9   3  12    1.42    0.40 
   2  -4 -12    1.00    0.65 
  -2   4  12    1.10    0.42 
   1  -4 -12    1.01    0.48 
  -1   4  12    0.54    0.46 
  -1   4  12   -0.05    0.46 
   0  -4 -12    0.31    0.32 
   0  -4 -12    0.43    0.71 
   0   4  12   -0.90    0.28 
   0   4  12    0.67    0.41 
  -1  -4 -12    1.17    0.55 
  -1  -4 -12    0.73    0.52 
   1   4  12    0.87    0.37 
   1   4  12    0.79    0.42 
  -2  -4 -12    8.67    1.71 
  -2  -4 -12   10.91    1.63 
   2   4  12   10.06    1.78 
  -3  -4 -12    1.24    0.54 
   3   4  12    0.57    0.36 
  -4  -4 -12    0.11    0.25 
  -4  -4 -12   -0.07    0.45 
   4   4  12    0.39    0.38 
  -5  -4 -12    4.70    1.17 
  -5  -4 -12    4.71    1.31 
   5   4  12    3.89    1.03 
  -6  -4 -12    2.39    0.88 
  -6  -4 -12    1.77    0.82 
   6   4  12    2.53    0.86 
  -7  -4 -12   -0.88    0.29 
  -7  -4 -12    0.03    0.44 
   7   4  12    0.90    0.44 
  -8  -4 -12   -0.41    0.31 
  -8  -4 -12   -0.17    0.32 
   8   4  12    0.15    0.39 
  -9  -4 -12    2.59    1.02 
   1  -5 -12    6.58    1.65 
  -1   5  12   10.47    1.91 
   0  -5 -12    0.19    0.47 
   0   5  12    0.36    0.29 
   0   5  12    0.34    0.35 
  -1  -5 -12    1.24    0.74 
  -1  -5 -12    2.17    0.82 
   1   5  12    0.43    0.37 
   1   5  12    2.69    0.80 
  -2  -5 -12   10.81    1.74 
  -2  -5 -12    8.45    1.74 
   2   5  12   11.48    1.82 
  -3  -5 -12    7.05    1.58 
  -3  -5 -12    5.31    1.09 
   3   5  12    5.74    1.22 
  -4  -5 -12   16.98    2.47 
  -4  -5 -12   15.05    1.55 
   4   5  12   17.03    2.31 
  -5  -5 -12    3.42    0.99 
  -5  -5 -12    2.59    0.90 
   5   5  12    3.52    1.05 
  -6  -5 -12   -0.77    0.42 
  -6  -5 -12    0.17    0.40 
   6   5  12    1.07    0.40 
  -7  -5 -12    4.61    1.13 
  -7  -5 -12    7.41    1.68 
   7   5  12   10.31    2.00 
  -8  -5 -12    3.76    1.28 
   8   5  12    2.68    0.89 
  -9  -5 -12    2.83    0.83 
   1  -6 -12   -0.21    0.44 
  -1   6  12    0.09    0.50 
   0  -6 -12   -0.49    0.35 
   0   6  12   -0.37    0.42 
   0   6  12   -0.16    0.31 
  -1  -6 -12    1.52    0.82 
  -1  -6 -12    2.71    0.93 
   1   6  12    1.25    0.53 
   1   6  12    1.24    0.39 
  -2  -6 -12   25.70    2.14 
  -2  -6 -12   20.59    2.74 
   2   6  12   26.34    2.27 
  -3  -6 -12    0.86    0.67 
  -3  -6 -12    3.41    0.85 
   3   6  12    1.27    0.72 
  -4  -6 -12   19.19    1.73 
  -4  -6 -12   20.40    2.72 
   4   6  12   20.13    2.71 
  -5  -6 -12    2.98    1.02 
  -5  -6 -12    1.25    0.44 
   5   6  12    1.36    0.58 
  -6  -6 -12    0.11    0.55 
   6   6  12    0.58    0.39 
  -7  -6 -12   -0.31    0.58 
   7   6  12    0.39    0.32 
  -8  -6 -12    0.05    0.53 
   8   6  12   -0.27    0.33 
   0  -7 -12    0.71    0.47 
   0   7  12    0.39    0.39 
  -1  -7 -12    1.85    0.75 
   1   7  12    1.15    0.34 
   1   7  12    1.28    0.48 
  -2  -7 -12    1.67    0.69 
  -2  -7 -12    0.91    0.50 
   2   7  12    1.22    0.47 
   2   7  12    1.10    0.41 
  -3  -7 -12    5.53    1.09 
  -3  -7 -12    3.86    1.12 
   3   7  12    5.01    1.22 
  -4  -7 -12    0.68    0.46 
   4   7  12    0.11    0.30 
  -5  -7 -12    3.27    1.05 
   5   7  12    4.11    1.08 
  -6  -7 -12    6.56    1.45 
   6   7  12    5.42    1.45 
  -7  -7 -12    4.79    1.36 
   7   7  12    6.35    1.49 
  -8  -7 -12    1.95    0.67 
   8   7  12    1.57    0.49 
  -2  -8 -12    7.73    1.34 
  -2  -8 -12    3.43    1.01 
   2   8  12    6.29    1.43 
   2   8  12    5.76    1.24 
  -3  -8 -12    0.63    0.47 
  -3  -8 -12    2.18    0.82 
   3   8  12    2.67    0.65 
  -4  -8 -12    1.59    0.87 
   4   8  12    3.20    0.96 
  -5  -8 -12    0.47    0.67 
   5   8  12    0.31    0.41 
  -6  -8 -12    1.10    0.78 
   6   8  12    2.08    0.97 
  -7  -8 -12    5.20    1.45 
   7   8  12    5.93    1.39 
  -1  -7  13    1.23    0.60 
   0   7 -13    2.17    0.89 
   0  -7  13    2.16    0.79 
  -1   7 -13    1.14    0.51 
   1  -7  13    1.20    0.46 
   2  -7  13    3.84    1.12 
  -3   7 -13    3.95    1.12 
   2   6 -13    2.50    0.68 
  -2  -6  13    1.18    0.37 
   1   6 -13    1.60    0.40 
  -1  -6  13    0.76    0.44 
   0   6 -13    0.75    0.43 
   0  -6  13    0.16    0.58 
  -1   6 -13    1.10    0.68 
   1  -6  13    1.51    0.69 
  -2   6 -13   -0.47    0.43 
   2  -6  13    0.35    0.36 
  -3   6 -13    1.23    0.50 
   3  -6  13    0.74    0.32 
  -4   6 -13   -0.27    0.39 
   4  -6  13    1.01    0.37 
  -5   6 -13    0.97    0.48 
   5  -6  13    1.69    0.51 
   2   5 -13   -0.58    0.38 
  -2  -5  13   -0.60    0.38 
   1   5 -13    0.64    0.43 
  -1  -5  13    0.11    0.59 
   0   5 -13    0.73    0.45 
   0  -5  13   -0.89    0.33 
  -1   5 -13   11.41    1.87 
   1  -5  13   11.23    1.93 
  -2   5 -13    0.00    0.37 
   2  -5  13    0.37    0.31 
  -3   5 -13    4.73    1.38 
   3  -5  13    4.85    1.23 
  -4   5 -13    0.37    0.40 
   4  -5  13   -0.24    0.32 
  -5   5 -13   -0.30    0.47 
   5  -5  13   -0.62    0.32 
  -6   5 -13   -0.10    0.37 
   6  -5  13    0.49    0.30 
   2   4 -13    2.58    0.65 
   2   4 -13    3.41    0.90 
  -2  -4  13    2.00    0.76 
   1   4 -13    2.17    0.72 
   1   4 -13    0.20    0.27 
  -1  -4  13    0.44    0.49 
   0   4 -13    1.04    0.42 
   0   4 -13    0.25    0.29 
   0  -4  13    1.57    0.72 
  -1   4 -13    6.36    1.44 
  -1   4 -13    5.42    1.08 
   1  -4  13    5.57    1.30 
  -2   4 -13    1.25    0.57 
  -2   4 -13    0.28    0.28 
   2  -4  13   -0.16    0.38 
  -3   4 -13   25.23    2.05 
  -3   4 -13   21.72    2.88 
   3  -4  13   23.16    2.26 
  -4   4 -13    1.01    0.36 
  -4   4 -13   -0.06    0.29 
   4  -4  13   -0.07    0.27 
  -5   4 -13    5.11    1.43 
   5  -4  13    5.19    1.33 
  -6   4 -13    3.32    1.40 
   6  -4  13    3.28    0.88 
   3   3 -13    0.71    0.37 
   3   3 -13    0.83    0.36 
  -3  -3  13   -0.37    0.33 
   2   3 -13    0.22    0.35 
   2   3 -13    0.39    0.41 
  -2  -3  13   -0.33    0.35 
   1   3 -13    1.32    0.48 
   1   3 -13    0.94    0.40 
  -1  -3  13   -0.40    0.35 
   0   3 -13    0.19    0.57 
   0   3 -13    0.12    0.31 
   0  -3  13   -0.09    0.36 
  -1   3 -13    7.58    1.59 
  -1   3 -13    8.22    1.52 
   1  -3  13    8.97    1.69 
  -2   3 -13    0.66    0.42 
  -2   3 -13   -0.53    0.34 
   2  -3  13   -0.30    0.25 
  -3   3 -13    5.91    1.32 
  -3   3 -13    5.66    1.32 
   3  -3  13    5.25    1.21 
  -4   3 -13    0.85    0.53 
  -4   3 -13    0.80    0.34 
   4  -3  13    2.50    0.80 
  -5   3 -13    0.48    0.29 
  -5   3 -13    1.33    0.76 
   5  -3  13   -0.66    0.30 
  -6   3 -13   -1.51    0.42 
  -6   3 -13    0.47    0.36 
   6  -3  13    0.57    0.33 
  -7   3 -13   -0.69    0.59 
  -7   3 -13    0.33    0.39 
   7  -3  13    0.37    0.30 
   3   2 -13    2.24    0.73 
   3   2 -13    2.29    0.68 
   2   2 -13    0.31    0.35 
   2   2 -13    0.10    0.26 
  -2  -2  13    0.71    0.31 
   1   2 -13    1.38    0.57 
   1   2 -13    0.56    0.39 
   0   2 -13    6.03    1.33 
   0   2 -13    7.52    1.59 
   0  -2  13    6.06    1.41 
  -1   2 -13    0.03    0.39 
  -1   2 -13   -0.30    0.24 
   1  -2  13    0.42    0.44 
  -2   2 -13    6.62    1.40 
  -2   2 -13    7.09    1.54 
   2  -2  13    9.91    1.82 
  -3   2 -13    5.24    1.25 
  -3   2 -13    7.24    1.65 
   3  -2  13    5.05    1.19 
  -4   2 -13    8.90    1.60 
  -4   2 -13    5.57    1.39 
   4  -2  13    7.18    1.53 
  -5   2 -13   11.60    1.90 
  -5   2 -13   10.20    1.89 
   5  -2  13   11.22    1.92 
  -6   2 -13    6.25    1.33 
  -6   2 -13    8.27    1.90 
   6  -2  13    8.40    1.63 
  -7   2 -13    3.42    1.01 
  -7   2 -13    4.85    1.23 
   7  -2  13    4.46    1.02 
  -8   2 -13    0.13    0.43 
   8  -2  13   -0.10    0.33 
   3   1 -13    0.04    0.40 
   3   1 -13    0.99    0.43 
  -3  -1  13    0.97    0.72 
   2   1 -13    0.30    0.28 
   2   1 -13   -0.53    0.30 
  -2  -1  13    1.34    0.35 
   1   1 -13    5.84    1.31 
   1   1 -13    5.58    1.38 
  -1  -1  13    6.91    1.32 
   0   1 -13    6.05    1.27 
   0   1 -13    4.75    1.19 
   0  -1  13    6.66    1.41 
  -1   1 -13    0.23    0.29 
  -1   1 -13   -0.30    0.37 
   1  -1  13    0.43    0.36 
  -2   1 -13    1.30    0.71 
  -2   1 -13    1.48    0.61 
   2  -1  13    3.50    1.07 
  -3   1 -13    9.43    1.74 
  -3   1 -13    9.38    1.71 
   3  -1  13    7.59    1.49 
  -4   1 -13    1.57    0.72 
  -4   1 -13    0.56    0.41 
   4  -1  13    0.79    0.43 
  -5   1 -13    0.49    0.54 
  -5   1 -13    1.94    0.65 
   5  -1  13    0.03    0.30 
  -6   1 -13    1.09    0.41 
  -6   1 -13    1.06    0.68 
   6  -1  13    1.50    0.77 
  -7   1 -13    1.02    0.37 
  -7   1 -13   -0.43    0.40 
   7  -1  13    0.63    0.40 
  -8   1 -13    1.91    0.50 
   8  -1  13    1.70    0.65 
   3   0 -13   -0.23    0.30 
   3   0 -13    0.79    0.54 
  -3   0  13    0.60    0.59 
   2   0 -13    0.56    0.49 
   2   0 -13    0.17    0.31 
  -2   0  13   -0.17    0.49 
   1   0 -13    7.61    1.57 
   1   0 -13    6.79    1.41 
  -1   0  13    5.44    1.23 
   0   0 -13    3.22    0.99 
   0   0 -13    2.36    0.79 
   0   0  13    3.12    0.82 
  -1   0 -13    2.29    0.84 
   1   0  13    2.42    0.84 
  -2   0 -13    2.67    0.90 
  -2   0 -13    2.07    0.87 
   2   0  13    1.50    0.60 
  -3   0 -13    2.48    0.93 
  -3   0 -13    2.61    0.89 
   3   0  13    0.82    0.40 
  -4   0 -13    0.23    0.45 
  -4   0 -13    0.66    0.47 
   4   0  13   -0.56    0.23 
  -5   0 -13    5.91    1.35 
  -5   0 -13    7.35    1.56 
   5   0  13    7.47    1.55 
  -6   0 -13    1.01    0.49 
  -6   0 -13    2.77    1.02 
   6   0  13    2.84    0.76 
  -7   0 -13    3.33    1.07 
  -7   0 -13    1.94    0.71 
   7   0  13    1.20    0.54 
  -8   0 -13    0.40    0.49 
  -8   0 -13    0.32    0.39 
   8   0  13   -0.66    0.34 
   2  -1 -13    0.87    0.39 
   2  -1 -13    0.89    0.44 
  -2   1  13    1.01    0.85 
   1  -1 -13   -0.19    0.35 
   1  -1 -13    0.14    0.38 
  -1   1  13    0.48    0.32 
  -1   1  13   -0.31    0.34 
   0  -1 -13   -0.41    0.23 
   0  -1 -13   -0.06    0.30 
   0   1  13    1.08    0.37 
  -1  -1 -13    1.32    0.63 
  -1  -1 -13    0.66    0.50 
   1   1  13    1.78    0.49 
  -2  -1 -13    6.34    1.49 
  -2  -1 -13    5.89    1.50 
   2   1  13    6.17    1.31 
  -3  -1 -13    0.05    0.26 
  -3  -1 -13   -0.69    0.29 
   3   1  13    1.38    0.48 
  -4  -1 -13    2.65    0.92 
  -4  -1 -13    3.87    1.09 
   4   1  13    5.21    1.24 
  -5  -1 -13    1.01    0.46 
  -5  -1 -13    1.56    0.59 
   5   1  13    0.61    0.41 
  -6  -1 -13   -0.19    0.30 
  -6  -1 -13    0.73    0.52 
   6   1  13    0.91    0.33 
  -7  -1 -13    0.46    0.53 
  -7  -1 -13   -0.35    0.34 
   7   1  13    0.83    0.44 
  -8  -1 -13    2.50    0.88 
  -8  -1 -13    1.46    0.67 
   8   1  13    1.31    0.39 
   2  -2 -13    1.64    0.79 
   2  -2 -13    0.34    0.39 
  -2   2  13    2.42    0.76 
   1  -2 -13    3.56    1.22 
   1  -2 -13    2.70    1.05 
  -1   2  13    5.01    1.21 
  -1   2  13    3.91    1.01 
   0  -2 -13    0.49    0.52 
   0  -2 -13   -0.01    0.30 
   0   2  13    0.56    0.43 
  -1  -2 -13    0.72    0.48 
  -1  -2 -13   -0.08    0.34 
   1   2  13    0.55    1.05 
  -2  -2 -13    0.95    0.56 
   2   2  13    0.03    0.44 
  -3  -2 -13    4.62    1.12 
  -3  -2 -13    3.11    1.04 
   3   2  13    3.29    1.00 
  -4  -2 -13    4.57    1.28 
  -4  -2 -13    5.09    1.25 
   4   2  13    4.13    1.09 
  -5  -2 -13    3.33    1.12 
  -5  -2 -13    2.08    0.69 
   5   2  13    4.03    1.14 
  -6  -2 -13    4.25    1.24 
  -6  -2 -13    4.10    1.15 
   6   2  13    4.12    1.12 
  -7  -2 -13    0.34    0.51 
  -7  -2 -13    0.62    0.57 
   7   2  13    0.56    0.29 
  -8  -2 -13    0.67    0.40 
  -8  -2 -13    0.83    0.41 
   8   2  13    0.27    0.33 
   2  -3 -13   -0.59    0.35 
  -2   3  13   -0.07    0.44 
   1  -3 -13    5.28    1.40 
   1  -3 -13   10.45    2.00 
  -1   3  13    8.16    1.65 
  -1   3  13    7.02    1.03 
   0  -3 -13   -0.05    0.43 
   0  -3 -13   -0.38    0.26 
   0   3  13    0.36    0.32 
   0   3  13    0.20    0.40 
  -1  -3 -13    2.82    1.04 
  -1  -3 -13    3.70    1.11 
   1   3  13    6.01    1.21 
  -2  -3 -13    5.98    1.23 
  -2  -3 -13    4.99    1.29 
   2   3  13    4.88    1.09 
  -3  -3 -13   -0.18    0.26 
  -3  -3 -13   -0.67    0.29 
   3   3  13    0.43    0.44 
  -4  -3 -13    4.78    1.27 
  -4  -3 -13    4.65    1.30 
   4   3  13    3.87    1.02 
  -5  -3 -13   -0.26    0.25 
  -5  -3 -13   -0.17    0.33 
   5   3  13    0.27    0.30 
  -6  -3 -13   -0.18    0.44 
  -6  -3 -13   -0.54    0.34 
   6   3  13    0.03    0.33 
  -7  -3 -13    0.36    0.41 
  -7  -3 -13    0.28    0.36 
   7   3  13   -0.41    0.27 
  -8  -3 -13    1.47    0.61 
  -8  -3 -13    2.76    0.74 
   8   3  13    2.72    0.90 
   1  -4 -13   11.90    2.34 
  -1   4  13   12.03    2.19 
   0  -4 -13    1.79    0.80 
   0  -4 -13    1.69    0.81 
   0   4  13    2.74    0.61 
   0   4  13    0.62    0.35 
  -1  -4 -13    0.37    0.41 
   1   4  13    0.12    0.33 
  -2  -4 -13    0.68    0.34 
  -2  -4 -13   -0.15    0.30 
   2   4  13    0.49    0.40 
  -3  -4 -13   10.11    1.91 
   3   4  13    7.98    1.63 
  -4  -4 -13   -0.18    0.41 
  -4  -4 -13    0.93    0.49 
   4   4  13    0.88    0.67 
  -5  -4 -13    3.90    1.12 
  -5  -4 -13    3.13    0.88 
   5   4  13    2.96    0.93 
  -6  -4 -13    0.05    0.33 
  -6  -4 -13    0.25    0.49 
   6   4  13   -0.12    0.28 
  -7  -4 -13    0.09    0.38 
  -7  -4 -13   -0.94    0.33 
   7   4  13    0.85    0.32 
  -8  -4 -13    9.97    2.01 
  -8  -4 -13    6.83    1.02 
   8   4  13    9.07    1.71 
   0  -5 -13    0.78    0.66 
   0  -5 -13   -0.28    0.44 
   0   5  13    1.25    0.32 
   0   5  13    0.38    0.48 
  -1  -5 -13    3.52    1.12 
  -1  -5 -13    3.37    1.24 
   1   5  13    2.53    0.79 
  -2  -5 -13   -0.75    0.34 
  -2  -5 -13    0.06    0.37 
   2   5  13   -0.30    0.32 
  -3  -5 -13    0.65    0.53 
  -3  -5 -13    1.53    0.72 
   3   5  13    2.29    0.74 
  -4  -5 -13    3.22    0.84 
  -4  -5 -13    4.31    1.17 
   4   5  13    3.51    1.14 
  -5  -5 -13   -0.18    0.44 
  -5  -5 -13    0.90    0.38 
   5   5  13    1.33    0.67 
  -6  -5 -13    0.38    0.61 
  -6  -5 -13   -0.05    0.32 
   6   5  13    0.27    0.30 
  -7  -5 -13    1.12    0.79 
   7   5  13    0.29    0.36 
  -8  -5 -13   -0.02    0.63 
   8   5  13    0.57    0.33 
  -1  -6 -13    1.71    0.74 
  -1  -6 -13    3.48    1.11 
   1   6  13    2.58    0.39 
   1   6  13    3.59    0.90 
  -2  -6 -13    2.29    0.98 
  -2  -6 -13    3.33    1.00 
   2   6  13    2.90    0.55 
  -3  -6 -13    1.67    0.71 
  -3  -6 -13   -0.20    0.36 
   3   6  13    0.97    0.63 
  -4  -6 -13    1.41    0.76 
  -4  -6 -13    3.62    0.86 
   4   6  13    3.72    1.14 
  -5  -6 -13   10.70    1.63 
  -5  -6 -13    9.06    1.93 
   5   6  13   12.39    2.19 
  -6  -6 -13   -0.86    0.33 
   6   6  13    0.19    0.48 
  -7  -6 -13    2.35    1.14 
   7   6  13    2.82    0.75 
  -2  -7 -13    1.83    0.69 
  -2  -7 -13    1.31    0.59 
   2   7  13    1.66    0.33 
  -3  -7 -13    0.19    0.31 
  -3  -7 -13   -0.29    0.44 
   3   7  13    1.06    0.39 
  -4  -7 -13    3.10    1.11 
   4   7  13    2.07    0.70 
  -5  -7 -13    9.32    1.97 
   5   7  13    6.36    1.53 
  -6  -7 -13    6.83    1.72 
   6   7  13   10.39    2.11 
   7   7  13    0.93    0.38 
  -1   6 -14    3.95    1.17 
   1  -6  14    2.89    1.16 
  -2   6 -14   -0.08    0.46 
   2  -6  14    0.89    0.35 
  -3   6 -14    0.59    0.44 
   3  -6  14    0.76    0.33 
   1   5 -14    0.31    0.42 
  -1  -5  14   -0.43    0.76 
   0   5 -14   -0.19    0.37 
   0  -5  14    0.42    0.51 
  -1   5 -14   -0.72    0.41 
   1  -5  14   -0.10    0.54 
  -2   5 -14   -0.22    0.40 
   2  -5  14    0.75    0.39 
  -3   5 -14    3.96    1.22 
   3  -5  14    5.61    1.30 
  -4   5 -14    0.06    0.44 
   5  -5  14    6.03    1.53 
   1   4 -14    0.00    0.30 
   1   4 -14   -0.66    0.41 
  -1  -4  14    0.49    0.53 
   0   4 -14    1.35    0.53 
   0   4 -14    0.40    0.29 
   0  -4  14    2.43    0.86 
  -1   4 -14    1.78    0.76 
  -1   4 -14    2.08    0.45 
   1  -4  14    2.43    0.85 
   2  -4  14    0.02    0.37 
  -3   4 -14    0.41    0.73 
   3  -4  14   -0.36    0.31 
  -4   4 -14   -0.03    0.44 
   4  -4  14   -0.83    0.27 
  -5   4 -14    0.32    0.46 
   5  -4  14   -0.55    0.28 
   1   3 -14    0.32    0.53 
   1   3 -14    0.88    0.32 
  -1  -3  14    1.11    0.53 
   0   3 -14    0.95    0.56 
   0   3 -14    1.94    0.70 
   0  -3  14    2.77    0.84 
  -1   3 -14    3.55    1.02 
  -1   3 -14    5.40    1.20 
   1  -3  14    4.34    1.08 
  -2   3 -14    0.54    0.56 
  -2   3 -14    0.43    0.30 
   2  -3  14    0.42    0.58 
  -3   3 -14    0.18    0.35 
  -3   3 -14    1.62    0.60 
   3  -3  14    0.40    0.38 
  -4   3 -14   10.00    1.76 
  -4   3 -14   11.92    2.25 
   4  -3  14   12.05    2.13 
  -5   3 -14    0.89    0.85 
  -5   3 -14    0.33    0.36 
   5  -3  14   -0.50    0.33 
  -6   3 -14    1.87    1.03 
  -6   3 -14    1.02    0.32 
   6  -3  14    1.71    0.59 
   2   2 -14    0.80    0.34 
   2   2 -14    0.15    0.34 
  -2  -2  14   -0.62    0.35 
   1   2 -14    8.77    1.76 
  -1  -2  14    7.17    1.33 
   0   2 -14    4.89    1.18 
   0   2 -14    3.50    1.04 
   0  -2  14    5.17    1.29 
  -1   2 -14    1.59    0.68 
  -1   2 -14    1.84    0.56 
   1  -2  14    0.99    0.46 
  -2   2 -14    2.00    0.72 
  -2   2 -14    1.03    0.49 
   2  -2  14    2.22    0.91 
  -3   2 -14    1.58    0.66 
  -3   2 -14    1.35    0.60 
   3  -2  14    2.43    0.83 
  -4   2 -14    8.55    1.73 
  -4   2 -14    4.69    1.22 
   4  -2  14    4.30    1.16 
  -5   2 -14   26.24    2.62 
  -5   2 -14   25.36    2.36 
   5  -2  14   30.18    2.67 
  -6   2 -14    1.61    0.74 
  -6   2 -14    2.30    0.90 
   6  -2  14    2.19    0.65 
  -7   2 -14    0.81    0.58 
  -7   2 -14    2.09    0.57 
   7  -2  14    0.97    0.36 
   2   1 -14    3.62    0.87 
   1   1 -14   -0.78    0.30 
   1   1 -14   -1.13    0.30 
  -1  -1  14    0.42    0.29 
   0   1 -14    1.59    0.74 
   0  -1  14    1.20    0.48 
  -1   1 -14    0.78    0.42 
  -1   1 -14    0.28    0.35 
   1  -1  14    1.10    0.78 
  -2   1 -14    0.07    0.29 
  -2   1 -14    0.35    0.44 
   2  -1  14    1.08    0.43 
  -3   1 -14    0.70    0.40 
  -3   1 -14    0.48    0.57 
   3  -1  14    0.19    0.47 
  -4   1 -14    4.38    1.05 
  -4   1 -14    3.11    1.18 
   4  -1  14    2.48    0.84 
  -5   1 -14    5.06    1.64 
  -5   1 -14    4.45    1.15 
   5  -1  14    5.15    1.20 
  -6   1 -14    0.77    0.34 
  -6   1 -14    0.29    0.60 
   6  -1  14   -0.48    0.34 
  -7   1 -14    6.36    1.36 
  -7   1 -14    5.50    1.53 
   7  -1  14    4.88    1.00 
   1   0 -14    0.39    0.39 
   1   0 -14    0.31    0.45 
  -1   0  14    0.88    0.35 
   0   0 -14    5.29    1.37 
   0   0 -14    5.12    1.13 
   0   0  14    3.28    0.95 
  -1   0 -14    1.14    0.40 
  -1   0 -14    0.71    0.47 
   1   0  14    1.59    0.45 
  -2   0 -14    5.12    1.35 
  -2   0 -14    3.89    1.16 
   2   0  14    4.19    0.99 
  -3   0 -14   -0.17    0.32 
  -3   0 -14    0.94    0.55 
   3   0  14   -1.00    0.35 
  -4   0 -14   11.97    2.10 
  -4   0 -14    8.83    1.71 
   4   0  14   11.55    1.96 
  -5   0 -14    7.75    1.65 
  -5   0 -14    7.85    1.72 
   5   0  14    7.22    1.56 
  -6   0 -14    0.07    0.30 
  -6   0 -14    0.12    0.40 
   6   0  14    0.60    0.30 
  -7   0 -14   -0.22    0.34 
   7   0  14    1.54    0.46 
   1  -1 -14    1.10    0.55 
   1  -1 -14    0.33    0.36 
  -1   1  14    0.58    0.34 
   0  -1 -14    2.12    0.89 
   0  -1 -14    2.04    0.76 
   0   1  14    4.12    1.06 
  -1  -1 -14    0.21    0.37 
  -1  -1 -14    0.63    0.35 
   1   1  14    0.64    0.38 
  -2  -1 -14    2.10    0.94 
  -2  -1 -14    1.31    0.67 
   2   1  14    2.81    0.83 
  -3  -1 -14    9.40    1.86 
  -3  -1 -14    8.33    1.76 
   3   1  14    9.65    1.83 
  -4  -1 -14    0.01    0.33 
  -4  -1 -14   -0.82    0.36 
   4   1  14   -0.09    0.36 
  -5  -1 -14   10.85    2.00 
  -5  -1 -14    8.89    1.72 
   5   1  14   10.84    1.86 
  -6  -1 -14    1.77    0.56 
  -6  -1 -14    1.40    0.47 
   6   1  14    0.42    0.47 
  -7  -1 -14    0.14    0.39 
  -7  -1 -14   -0.59    0.41 
   7   1  14    0.17    0.36 
  -8  -1 -14    0.83    0.51 
  -8  -1 -14    2.34    0.74 
   8   1  14    2.69    0.65 
   1  -2 -14   -0.39    0.29 
   1  -2 -14   -0.54    0.35 
  -1   2  14    0.16    0.33 
  -1   2  14   -0.47    0.43 
   0  -2 -14    9.74    1.90 
   0  -2 -14    7.86    1.74 
   0   2  14    9.90    1.67 
  -1  -2 -14    0.22    0.41 
  -1  -2 -14    0.43    0.50 
   1   2  14    0.37    0.38 
  -2  -2 -14    2.96    1.22 
   2   2  14    3.76    1.02 
  -3  -2 -14    0.26    0.29 
  -3  -2 -14   -0.70    0.35 
   3   2  14   -0.91    0.45 
  -4  -2 -14    0.41    0.45 
  -4  -2 -14    0.45    0.40 
   4   2  14    0.57    0.43 
  -5  -2 -14    0.06    0.40 
  -5  -2 -14    0.67    0.50 
   5   2  14    0.32    0.31 
  -6  -2 -14    1.28    0.71 
  -6  -2 -14    2.44    0.83 
   6   2  14    1.45    0.64 
  -7  -2 -14    0.13    0.43 
  -7  -2 -14   -1.20    0.35 
   7   2  14    0.74    0.39 
  -8  -2 -14   -0.30    0.40 
  -8  -2 -14   -0.68    0.42 
   8   2  14    0.53    0.46 
   0  -3 -14   -0.40    0.33 
   0   3  14   -0.18    0.33 
  -1  -3 -14    1.40    0.77 
  -1  -3 -14    0.67    0.44 
   1   3  14    1.50    0.56 
  -2  -3 -14    1.82    0.78 
  -2  -3 -14    2.63    1.00 
   2   3  14    0.81    0.47 
  -3  -3 -14    1.02    0.37 
  -3  -3 -14    0.71    0.61 
   3   3  14    0.42    0.48 
  -4  -3 -14    1.52    0.56 
  -4  -3 -14    0.22    0.34 
   4   3  14    0.32    0.57 
  -5  -3 -14   -0.02    0.43 
  -5  -3 -14   -0.12    0.33 
   5   3  14    0.24    0.41 
  -6  -3 -14    0.16    0.57 
  -6  -3 -14    0.73    0.44 
   6   3  14    1.90    0.53 
  -7  -3 -14   -0.62    0.35 
  -7  -3 -14    1.03    0.62 
   7   3  14    0.82    0.33 
  -8  -3 -14   -0.57    0.35 
  -8  -3 -14   -0.25    0.47 
   8   3  14    0.13    0.33 
   0  -4 -14    0.38    0.50 
   0  -4 -14    0.10    0.49 
   0   4  14   -0.09    0.36 
   0   4  14    1.17    0.53 
  -1  -4 -14   -0.02    0.33 
  -1  -4 -14    0.68    0.40 
   1   4  14    1.78    0.43 
  -2  -4 -14    0.74    0.39 
  -2  -4 -14    1.00    0.50 
   2   4  14    0.90    0.58 
  -3  -4 -14    1.45    0.52 
  -3  -4 -14    1.65    0.76 
   3   4  14    1.93    0.61 
  -4  -4 -14    0.18    0.38 
  -4  -4 -14   -0.27    0.31 
   4   4  14   -0.61    0.43 
  -5  -4 -14    1.43    0.60 
  -5  -4 -14    0.34    0.42 
   5   4  14   -0.42    0.38 
  -6  -4 -14    0.76    0.65 
  -6  -4 -14    0.22    0.36 
   6   4  14    0.45    0.31 
  -7  -4 -14    1.03    0.42 
  -7  -4 -14    1.32    0.54 
   7   4  14    0.89    0.39 
  -1  -5 -14    1.14    0.59 
  -1  -5 -14    0.07    0.38 
   1   5  14    0.55    0.39 
  -2  -5 -14   -0.17    0.28 
  -2  -5 -14   -0.18    0.47 
   2   5  14   -0.26    0.35 
  -3  -5 -14    0.09    0.61 
   3   5  14    0.09    0.48 
  -4  -5 -14    1.89    0.91 
  -4  -5 -14    1.23    0.49 
   4   5  14    1.69    0.61 
  -5  -5 -14    5.79    1.25 
  -5  -5 -14    2.85    1.28 
   5   5  14    5.42    1.44 
  -6  -5 -14   -0.03    0.58 
  -6  -5 -14    0.89    0.35 
   6   5  14    1.88    0.61 
  -7  -5 -14    4.65    1.37 
   7   5  14    5.15    1.12 
   2   6  14    0.27    0.38 
  -3  -6 -14   -0.29    0.41 
  -3  -6 -14   -0.02    0.32 
   3   6  14   -0.27    0.39 
  -4  -6 -14    0.50    0.38 
  -4  -6 -14    0.21    0.52 
   4   6  14    0.22    0.51 
  -5  -6 -14   -0.61    0.35 
  -5  -6 -14    0.90    0.76 
   5   6  14    1.07    0.55 
  -6  -6 -14   -0.43    0.44 
   6   6  14    1.10    0.58 
  -1   4 -15    4.98    1.40 
   1  -4  15    4.06    0.93 
  -2   4 -15    2.11    0.71 
   2  -4  15   -0.05    0.49 
  -3   4 -15   -0.02    0.45 
   3  -4  15   -0.23    0.32 
  -4   4 -15    0.44    0.44 
   4  -4  15   -0.20    0.34 
   0   3 -15    0.35    0.35 
   0   3 -15   -0.07    0.35 
   0  -3  15    0.07    0.39 
  -1   3 -15    2.17    0.69 
  -1   3 -15    3.67    0.77 
   1  -3  15    3.30    0.99 
  -2   3 -15    3.20    0.89 
  -2   3 -15    2.77    0.81 
   2  -3  15    1.10    0.65 
  -3   3 -15    0.27    0.44 
  -3   3 -15    0.29    0.39 
   3  -3  15    0.93    0.50 
  -4   3 -15   -0.18    0.34 
  -4   3 -15   -0.02    0.46 
   4  -3  15    1.39    0.35 
  -5   3 -15    1.12    0.46 
  -5   3 -15    0.29    0.61 
   5  -3  15    2.16    0.65 
   0   2 -15    6.48    1.39 
   0   2 -15    4.56    1.41 
   0  -2  15    5.31    1.28 
  -1   2 -15   -0.43    0.42 
  -1   2 -15    0.35    0.34 
   1  -2  15    0.39    0.49 
  -2   2 -15   -0.22    0.50 
  -2   2 -15    1.34    0.52 
   2  -2  15   -0.54    0.41 
  -3   2 -15    0.70    0.44 
  -3   2 -15    0.84    0.47 
   3  -2  15   -0.18    0.48 
  -4   2 -15    0.24    0.64 
  -4   2 -15    0.79    0.45 
   4  -2  15    0.01    0.34 
  -5   2 -15   12.62    2.36 
  -5   2 -15   11.46    1.96 
   5  -2  15   11.63    2.00 
  -6   2 -15   -0.31    0.57 
  -6   2 -15    1.05    0.46 
   6  -2  15    1.06    0.34 
   0   1 -15    2.48    0.63 
   0   1 -15    0.24    0.50 
   0  -1  15   -0.46    0.32 
  -1   1 -15   -0.37    0.40 
  -1   1 -15   -0.61    0.34 
   1  -1  15    0.01    0.35 
  -2   1 -15   -0.72    0.44 
  -2   1 -15    0.43    0.32 
   2  -1  15    0.60    0.38 
  -3   1 -15   -0.08    0.47 
  -3   1 -15    0.10    0.39 
   3  -1  15    0.21    0.50 
  -4   1 -15    4.63    1.14 
  -4   1 -15    5.55    1.32 
   4  -1  15    5.60    1.51 
  -5   1 -15    0.59    0.41 
  -5   1 -15    0.54    0.47 
   5  -1  15    0.45    0.50 
  -6   1 -15   16.27    2.56 
  -6   1 -15   15.26    2.58 
   6  -1  15   13.40    2.29 
   0   0 -15    1.53    0.44 
   0   0 -15    0.53    0.43 
   0   0  15    0.82    0.42 
  -1   0 -15    5.11    1.27 
  -1   0 -15    4.31    1.30 
   1   0  15    3.65    1.08 
  -2   0 -15    0.48    0.61 
  -2   0 -15    0.75    0.42 
   2   0  15    0.72    0.57 
  -3   0 -15    0.36    0.37 
  -3   0 -15   -0.09    0.39 
   3   0  15   -0.90    0.40 
  -4   0 -15    0.44    0.34 
  -4   0 -15    0.93    0.82 
   4   0  15    0.12    0.50 
  -5   0 -15    0.69    0.46 
  -5   0 -15    0.35    0.49 
   5   0  15    0.35    0.32 
  -6   0 -15    0.95    0.41 
  -6   0 -15    1.34    0.69 
   6   0  15    0.21    0.40 
   0  -1 -15   -0.02    0.31 
   0  -1 -15    1.14    0.56 
   0   1  15    0.60    0.38 
  -1  -1 -15    6.11    1.48 
   1   1  15    6.61    1.35 
  -2  -1 -15    0.65    0.65 
  -2  -1 -15    1.22    0.55 
   2   1  15    1.73    0.75 
  -3  -1 -15    9.00    1.73 
  -3  -1 -15   11.99    2.18 
   3   1  15   10.94    2.02 
  -4  -1 -15    0.78    0.52 
  -4  -1 -15    0.28    0.60 
   4   1  15    0.21    0.48 
  -5  -1 -15    7.63    1.75 
  -5  -1 -15    6.95    1.59 
   5   1  15    7.00    1.59 
  -6  -1 -15    7.45    1.76 
  -6  -1 -15    4.83    1.23 
   6   1  15    5.31    1.23 
   7   1  15    3.61    0.90 
  -1  -2 -15    3.68    1.02 
  -1  -2 -15    6.24    1.45 
   1   2  15    4.35    0.90 
  -2  -2 -15    1.92    0.53 
  -2  -2 -15    0.16    0.37 
   2   2  15    0.61    0.50 
  -3  -2 -15    4.35    1.19 
  -3  -2 -15    3.91    0.97 
   3   2  15    4.33    1.19 
  -4  -2 -15    0.34    0.45 
  -4  -2 -15    0.24    0.43 
   4   2  15    0.11    0.53 
  -5  -2 -15    0.15    0.36 
  -5  -2 -15   -0.70    0.33 
   5   2  15    0.22    0.50 
  -6  -2 -15    4.57    1.17 
  -6  -2 -15    9.35    1.98 
   6   2  15    5.04    1.30 
   7   2  15    0.10    0.35 
  -1  -3 -15    0.31    0.42 
  -1  -3 -15    0.34    0.49 
   1   3  15    0.54    0.33 
  -2  -3 -15   -0.68    0.35 
   2   3  15   -0.09    0.32 
  -3  -3 -15   -0.20    0.52 
   3   3  15   -0.54    0.41 
  -4  -3 -15    0.02    0.40 
  -4  -3 -15    0.09    0.30 
   4   3  15    0.81    0.49 
  -5  -3 -15    0.03    0.58 
  -5  -3 -15    0.45    0.33 
   5   3  15   -0.10    0.67 
  -6  -3 -15    0.19    0.39 
  -6  -3 -15   -0.86    0.30 
   6   3  15   -0.67    0.35 
  -2  -4 -15    1.20    0.46 
  -2  -4 -15   -0.16    0.34 
   2   4  15   -0.22    0.37 
  -3  -4 -15    1.76    0.57 
  -3  -4 -15    0.73    0.45 
   3   4  15   -0.67    0.34 
  -4  -4 -15   -1.18    0.36 
  -4  -4 -15    0.72    0.46 
   4   4  15   -0.48    0.34 
  -5  -4 -15   -0.24    0.32 
  -5  -4 -15   -0.26    0.30 
   5   4  15    1.37    0.72 
  -6  -4 -15    0.21    0.33 
  -6  -4 -15    0.47    0.40 
   6   4  15    0.84    0.36 
   4   5  15    1.31    0.45 
  -3   1 -16    0.08    0.44 
  -3   1 -16    0.22    0.30 
   3  -1  16    0.23    0.54 
  -4   1 -16   -0.24    0.43 
   4  -1  16   -0.16    0.34 
  -3   0 -16    0.47    0.39 
  -3   0 -16    0.56    0.40 
   3   0  16    0.64    0.51 
  -4   0 -16   -0.44    0.44 
  -4   0 -16    0.48    0.35 
   4   0  16   -0.57    0.35 
  -3  -1 -16    0.37    0.34 
   3   1  16   -0.20    0.34 
  -4  -1 -16    0.01    0.48 
  -4  -1 -16    0.86    0.40 
   4   1  16    0.69    0.43 
   0   0   0    0.00    0.00 
; 
_shelx_hkl_checksum   35489 
  
